# Supplementary material
Source: publisher site journal article supplement (https://www.degruyterbrill.com/publication/isbn/9783111577173/downloadAsset/9783111577173_Transkription%20Gebetbuch.pdf)
Supplement: Supplementary file 1 [file 9783111577173_Transkription%20Gebetbuch.pdf]

Wort – Bild – Zeit.  
Studien zum Gebetbuch für Margaretha von Kappel

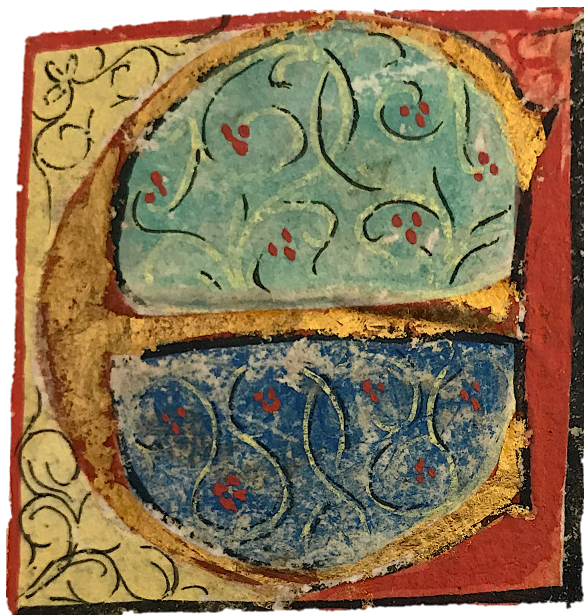

Anhang: Arbeitstranskription des Gebetbuches (mit Abbildungen)

## **Inhaltsverzeichnis**

|                                                              |   |
|--------------------------------------------------------------|---|
| Transkriptionsrichtlinien .....                              | 2 |
| Arbeitstranskription des Gebetbuches (mit Abbildungen) ..... | 4 |



## **Transkriptionsrichtlinien**

Die Arbeitstranskription der im Gebetbuch der Margarethe enthaltenen Texte ist der Untersuchung als Rohfassung im Anhang beigegeben. In diesem finden sich überdies Abbildungen der Miniaturen sowie des weiteren Buchschmucks des Gebetbuches, die in der Ordnung ihres Vorkommens an der entsprechenden Position innerhalb der Handschrift in die Arbeitstranskription eingefügt wurden. Dies soll das Hinzuziehen der Texte und Miniaturen während der Lektüre der Studie erleichtern und zugleich den Umfang der Arbeit schmälern.

Bei der vorliegenden Arbeitstranskription handelt sich um eine Rohfassung und keine Edition. Sie macht die im Gebetbuch der Margarethe von Kappel enthaltenen Texte zugänglich und hält sich weitestgehend buchstabengetreu an die Vorgaben der Handschrift. Die wenigen editorischen Eingriffe dienen der Lesehilfe sowie der erleichterten Orientierung der Leser.

Interpunktion und Textgliederung:

- Die handschriftliche Interpunktion wurde originalgetreu erfasst. Das gilt auch für Unterstreichungen sowie die Groß- und Kleinschreibung.
- Die Getrennt- und Zusammenschreibung einzelner Wörter erfolgt handschriftengetreu.
- Redaktionelle Zusätze, Anmerkungen und Seitenzahlen sind in eckige Klammern gesetzt [ ... ].
- Das Gliederungssystem der Handschrift wurde übernommen. Rubrizierungen werden in roter Farbe und blaue Majuskeln, Initialen oder Lombarden in blauer Farbe wiedergegeben. Majuskeln, Initialen und Lombarden werden alle als farbige Großbuchstaben dargestellt. Darüber hinaus werden sie nicht im Einzelnen unterschieden.
- Wo dies die Rezeption der Texte erleichtert, wurde eine Sinngliederung einzelner Textabschnitte durch eingefügte Absätze vorgenommen (dies gilt in erster Linie für Absätze nach Rubriken oder bei Aufzählungen).
- Offenkundige Schreibfehler sowie Korrekturen werden in der Transkription korrigiert bzw. übernommen und in den Fußnoten angemerkt.

Vokalismus und Konsonantismus:

- Die Buchstaben *u* und *v* wurden gemäß ihrem Lautwert normalisiert.
- Schaft-*s* und Rund-*s* wurden nicht unterschieden, sondern beide als Rund-*s* transkribiert.

- Die Graphie *sz* wird als *ß* und das geschwänzte-*z* als *z* wiedergegeben.
- Diakritika und Superskripte wurden entsprechend der Handschrift übernommen. Senkrechte oder schräge Striche über Vokalen werden durch die Überschreibung der entsprechenden Vokale mit einem Schrägstrich markiert (bspw. *gekündet*, *künfftig*, *fünff*, S. 1). Feine oder grobe Punkte über Vokalen werden durch die Überschreibung der Vokale mit zwei Punkten gekennzeichnet (bspw. *(an)rüffen*, *messyas*, *fröden*, S. 1).
- Dialektale Eigenheiten, wie sie bspw. das sog. alemannische Dehnungs-*u* als *u* nach einem Vokal oder *v* über einem Vokal darstellen (vgl. *den gewauren messyas / von der schöss sins vatters*, S. 1), wurden beibehalten.

#### Abbiaviaturen:

- Abbiaviaturen sowohl deutscher als auch lateinischer Wörter werden aufgelöst und in runde Klammern gesetzt ( ... ).

Die in den Fußnoten angegebenen lateinischen Texte der liturgischen Gesänge und Bibelverse sowie die weiteren Angaben und Informationen zu den entsprechenden liturgischen Texten entstammen der Cantus-Database for Latin Ecclesiastical Chant (<https://cantus.uwaterloo.ca/>) und der Datenbank lateinischer Gesänge des gregorianischen Mess- und Stundengebetsrepertoires (<https://gregorien.info/>). Die biblischen Verse werden zitiert nach der Vulgata.<sup>1</sup> Die verwendeten Abkürzungen entsprechen denen der Untersuchung des Gebetbuches.

---

<sup>1</sup> Weber, Robert, Gryson, Roger (Hrsg.): Biblia Sacra Vulgata, 5. Auflage, Stuttgart 2007 (Deutsche Bibelgesellschaft Stuttgart), online abrufbar unter <https://www.bibelwissenschaft.de/online-bibeln/biblia-sacra-vulgata/lesen-im-bibeltext/>.

## Arbeitstranskription des Gebetbuches (mit Abbildungen)

**H**ie nach sind geschriben die hohzit únsers lieben herren ihū xpī von dem als die hailigen patriarchen und propheten in haind us gekúndet den gewauren messyas kúnfftig und das selb ewig wort des vätterlichen hertzen us ist gangen von der schöss sins vatters. **A**b gangen von dem himel und kom(m)en in diss welt untz das er wider um(b) mit fröden ist wider keren in siner erlichen uf fart zū sinem hymelschen vatter **D**o er alles das hat volbracht volkomenlich darum(b) er in gesennt hat in dis welt uns aller der welt zū hail und zū ainer erlösung **U**nd ist iegliches zit ze begond ordenlich und andächterlich als darzū gehört un(d) es die hailig cristenhait vor [2] ir hat

### der advent

**D**Es ersten begät man das zit das da haisset der advent die vier zū kunfften oder die vier **S**unnentag vor wyhennächt **D**en(n) sol ain ieglicher cristenlicher mensch sin hertz und sin gemüt uff erheben zū gott und sol flyssenclichen war nem(m)en. wie mit so in hitziger begird und hertzlichem belangen die hailgen vatter in der alten **E**e **D**ie wirdigen patriarchen und propheten haind begert **D**er zū kunfft unsers lieben herren und wie menig innicliches rüffen un(d) gebett sy haind geton zū got dem ewigen vatter daß er inen und uns santi sinen ain gebornen sun **A**ch des edlen zites der gnaden des sy mit so großem iomer begertent und baitetent und inen doch nit werden mocht wie hailig sy wärent **U**nd wir súndi[3]gen menschen des edlen zites der gnaden so gnüg und volkomenlichen haind und so eß so úbel und so un nutzenclich und so unfruchtbarlichem anlegent das müß den minneclichen gott yemer erbarmen und im geclagt sin **U**nd daß sol och der mensch mit ainem rúwigen hertzen tūn so er diese ding also an sicht **E**r sol och sunderlich bedencken wie menig lieplich gesicht sy habent gesehen in dem hailigen gaist **D**er so menig süß wort durch sy hat gesprochen von der edlen menschait ihū xpī und besunder als er empfangen und geboren wart **D**er zit sy me denn fúnff tusent iār mit grössem belangen hatten gebaitet **U**nd besunder der wirdig prophet ysayas ist dieser dingen ain gewärer zúg und us kúnder gewesen in siner wis sagung und ouch die andren hailgen propheten **A**ls hie nach von yeglichem ain wenig [4] geschriben stät **U**nd darumb sol och der mensch der da gern wil cristenlich un(d) selenclich leben in disem zit des adventes. mit sundrigem gebett an got begeren das er in bereit mit allen tugenden ze enpfahen **D**en costbarlichen schatz sinen geminten sun unsern lieben herren ihesum xpī an dem hoch gelobten hohzit sins gebürtlichen tags **S**o er ist kom(m)en und erschinen in menschlicher natur **U**nd uff disen edlen gast sol er sich mit den hailigen

propheten von gantze(n) herten fröwen. recht als ob er noch erst geboren sölle werden ¶ Und der mensch sol alles sin gebett das er än das tut und alle sine gütte werch hier in(n) richten und ordnen in dieser Minn mainung und begird So wirt es gott gefellig

An dem ersten Son(n)entag Adve(n)t

AN dem Sambstag des ersten Sonnentags in dem advent [5] vächet man an singen und lesen in der hailgen Cristenhait von der wis sagung der propheten und sind die sprüch under schaiden und getailt durch den gantzen advent Und fähent an also

Antiffen

NEment war es komet der nam des herren von Vernuß und sin clarhait erfüllt den umbkrais des ertrichs<sup>2</sup> Aspiciens a longe. Also sah der prophet und wis sait und sprach Nement war Ich sich den gewalt gottes kom(m)en und mit ainem nebel das gantz ertrich bedecken. gond im us engegen und sprechent zü im Verkünd uns ob du es selber sygist der du richsnent bist in dem volk ysrahel<sup>3</sup> V(ersus) Tünt uff ir fürsten úwer porten und heben uff úwri ewige tor das in gang der kúng der eren<sup>4</sup> Aber ain propheci Ich sah in der gesicht der nacht un(d) nement war in den wol[6]ken des him(m)els kam des mensche(n) sun und im wart geben das rich und er und alles ertrich und alles volk und geschlächet und zungen die werdent im dienen<sup>5</sup> Sin gewalt ist ain ewiger gewalt der nit von im genomen wirt Und sin rich dz wirt nit zerstört<sup>6</sup> Och singt die hailig kilch also an dem anfang der metti och in der ersten nacht des adventes also Koment her wir söllent an betten den künftigen kúng<sup>7</sup> Nement war der obrest kung komet das er wil behalten sin volck<sup>8</sup> Aber sprichet ain prophet in unsers herren person Nement war Ich kum(n) schier und min lon mit mir

<sup>2</sup> Vgl. Ecce nomen domini venit de longinquo et claritas ejus replet orbem terrarum. Dom. 1 Adventus, First Vespers, Antiphon, Cantus ID 002527.

<sup>3</sup> Vgl. Aspiciens a longe ecce video dei potentiam venientem et nebulam totam terram tegentem ite obviam ei et dicite nuntia nobis si tu es ipse qui regnaturus es in populo Israel. Dom. 1 Adventus, Matins, Responsory, Cantus ID 006129.

<sup>4</sup> Vgl. Tollite portas principes vestras et elevamini portae aeternales et introibit. Dom. 1 Adventus, Matins, Responsory verse, Cantus ID 006129c; Außerdem: Ps 23, 7.

<sup>5</sup> Vgl. Aspicebam in visu noctis et ecce in nubibus caeli filius hominis venit et datum est ei regnum et honor et omnis populus tribus et linguae servient ei. Dom. 1 Adventus, Matins, Responsory, Cantus ID 006128.

<sup>6</sup> Vgl. Potestas ejus potestas aeterna quae non auferetur et regnum ejus quod non corrumpetur. Dom. 1 Adventus, Matins, Responsory verse, Cantus ID 006128b.

<sup>7</sup> Vgl. Regem venturum dominum venite adoremus. Dom. 1 Adventus, Matins, Invitatory antiphon, Cantus ID 001149.

<sup>8</sup> Vgl. Veniet ecce rex excelsus cum cum potestate magna ad salvandas gentes. Dom. 1 Adeventus, Matins, Antiphon, Cantus ID 205133.

spricht der herr **U**nd wil yeclichem geben nah sinen wercken also spricht die hailig kilch **C**ristus unser kung kom(m)et den iohannes hat. us gebrediget ze sin ain kúnfftiges lamb ¶ **A**ber ain prophet spricht [7] also begirlich **A**n dem tag da maint er siner zü kunfft in siner gebürt so werdent die berg tropffen von süssikait und die búhel fliessent honig und milch alleluia.<sup>9</sup> **F**röw dich du tochter von syon bis gnüg hüglich tochter von iherusalem<sup>10</sup> **W**en nement war der herr kun(n)t und alle sin hailgen mit im und es wirt an dem tag ain grösses liecht des lobent gott<sup>11</sup> **a**n(tifon) **A**lle die da türstig sind die komint zu dem wasser. süchent den herren die wil ir in finden mugent.<sup>12</sup> **D**avit spricht in dem **S**alter **M**in sel türstet zü gott dem lebenden brun(n)en **O** wen(n) sol ich kom(m)en und erschynen vor dem anlút gottes<sup>13</sup> **U**ber dis propheten un(d) wissagen all vermanet úns der hailig apostel **S**anctus paul(us) **U**nd sprichet och als wir singent in der metti **R**(esponsorium) **W**ir söllent baiten únsers behalters ihū xpī der [8] da wider bilden wil den lib úns der demütikait und wil in verclären un(d) gelichen dem lib siner clarhait<sup>14</sup> dārum(b) söllent wir mässenclich und gerechtenclich und miltenclich leben in dieser welt **U**nd söllent baiten der sáligen züversicht und der eren des größen gottes<sup>15</sup> ¶ **N**un underwist úns aber in disem hailge(n) zit ain hailig bāpst der haist leo und vermanet úns wie wir úns in disem hailigen zit des adventes söllent halten und sprichet also als man list in der metti **S**ermo

**A**ller liebsten kind das hailig und begirlich **D**as erwirdig und sunderlich hochzit **D**as ist der gebürtlich tag unsers lieben herren und únsers behalters den söllent wir mit grösser andächt **U**nd mit aller begird emfāhen und sond úns mit gantzen krefftē. mit siner hilff dar zü beraite(n) [9] und all gebresten úns sel fließenclichen an sehen das enkain sünd in úns verborgen sy die úns der gewissne

<sup>9</sup> Vgl. In illa die stillabunt montes dulcedinem et colles fluent lac et mel alleluia. Dom. 1 Adventus, Lauds, Antiphon, Cantus ID 003244.

<sup>10</sup> Vgl. *Jucundare filia Sion exsulta satis filia Jerusalem alleluia*. Dom. 1 Adventus, Lauds, Antiphon, Cantus ID 003509.

<sup>11</sup> Vgl. Ecce dominus veniet et omnes sancti ejus cum eo et erit in die illa lux magna alleluia. Dom. 1 Adventus, Lauds, Antiphon, Cantus ID 002509.

<sup>12</sup> Vgl. Omnes sitientes venite ad aquas quaerite dominum dum inveniri potest alleluia. Dom. 1 Adventus, Lauds, Antiphon, Cantus ID 004133.

<sup>13</sup> Vgl. Ps 41, 3: Sitivit anima mea ad Deum fortem, vivum; quando veniam, et apparebo ante faciem Dei?

<sup>14</sup> Vgl. Salvatorem exspectamus dominum Jesum Christum qui reformavit corpus humilitatis nostrae configuratum corpori claritatis suae. Dom. 1 Adventus, Matins, Responsory, Cantus ID 007562.

<sup>15</sup> Vgl. Sobrie et juste et pie vivamus in hoc saeculo exspectantes beatam spem et adventum gloriae magni die. Dom. 1 Adventus, Matins, Responsory verse, Cantus ID 007562b.

mug töden und entraingen **U**nd die ogen der götlichen maienstät mug erzürnen ¶ **W**on xpūs únser her(r) nah sinem liden urstendi und uffart als es ze merckent ist so wil er flysenclichen an sehen **W**ie sich ain yeclicher mensch in disem hailgen zit des adventes hab gehalten än gitikait än zorn än hoffart än luterkait und sich also hab berait gegen dem erlichen hochzit siner gebürt und nach dem als er ainen ieklichen glöbigen menschen vindet geschickt un(d) berait **D**arnach wil er im sin gnad und erbarmhertzikait mit tailen **U**nd welen menschen xpūs also sicht geziert mit güten sitten und mit dem edlen gestain der erbarmhertzikait und in sicht kúnsch.<sup>16</sup> **D**emütig gütig. mässig und wacker **W**e[10]len er alsus beken(n)t dem wil er sinen hailigen fronlichnam nit zü ainem urtail besunder zü ainer ärtzney durch die dienstbarkait der priester mittailen **S**icht er aber yeman der e brechig ist oder truncken. gittig oder hohferti so fürcht ich dz er zü dem gesprochen werd das in dem **E**wangelio geschriben stat **F**rúnd wie bist du her in kom(m)en und hattest nit ain hohzitlich claid an und das dar nach folget **B**indent im hend und füss und werffent in in die ussren finsternus da wirt wainen und grissgrâmen der zenen **S**ehent und nement war aller liebsten wie ain hert urtail denen nah volget die da än rúw und än bicht unberait und ungeziert mit tugenden koment zü dem hohzitlichen tag der gebürt unsers herren ihū xpī **N**un merckent für bas in dem [11] advent sind vier sunnentag daby sind bezaichnet vier zü kúnfften únsers herren **B**y dem ersten sunnentag ist bezaichnet die zü kunfft als únser herr mensch wart hie uff ertrich **A**lso ist er kom(m)en in ainem liechten wolken **A**ls ysaʔas hat gesprochen von im z<sup>17</sup> die zü kunfft hat er getan von minnen und darumb sollent wir in wider minnen und söllent wegen sine werch die er durch uns geton hât das der größ klain ist worden un(d) der rich arm und das leben tötlich ist worden das solt du wegen un(d) solt erkennen dinen nutz der dir **D**a von ist kom(m)en das die natur veraingot ist mit got das sy erhaben ist úber die nún chör der engel und das du sin erb besitzen solt das solt du erkennen und solt anfahen gott ze loben an dem ersten **S**unnentag umb das güt [12] das er dir hat geton und lob in dūrch die wuchen alle mit sunder bett<sup>18</sup> **I**n der wuchen sind sechs tag die sol ain gaistlich mensch fasten **D**en ersten tag solt du fasten **A**ls únser herr ward verkündet unser frowen **D**en andern **A**ls er gebören ward **D**en dritten **A**ls er gemartret ward **D**en vierten **A**ls er ze der hell für **D**en fünfften **A**ls er von dem tod erstünd **D**en sechsten **A**ls er ze himel. für

---

<sup>16</sup> Alemannisch für *kusch*.

<sup>17</sup> Schreibfehler?

<sup>18</sup> *mit sunder bett* wurde von späterer Hand nachgetragen und ragt über den Schriftspiegel hinaus.

und als er den hailigen gaist san(n)t sinen iungern **A**lso solt du gott loben der  
ersten zü kunfft das er mensch ist worden. **H**ie solt du got an rúffen. mit den  
hailgen alt vättern und solt in dieser ersten advent wuchen. all tag sprechen diß  
gebett. als och die hailig cristenhait bettet **U**nd sprich denn also mit andächt  
und mit innigem hertzen [13]



[Miniatur: ‚Dreifaltigkeit mit Christus als Schmerzensmann‘]

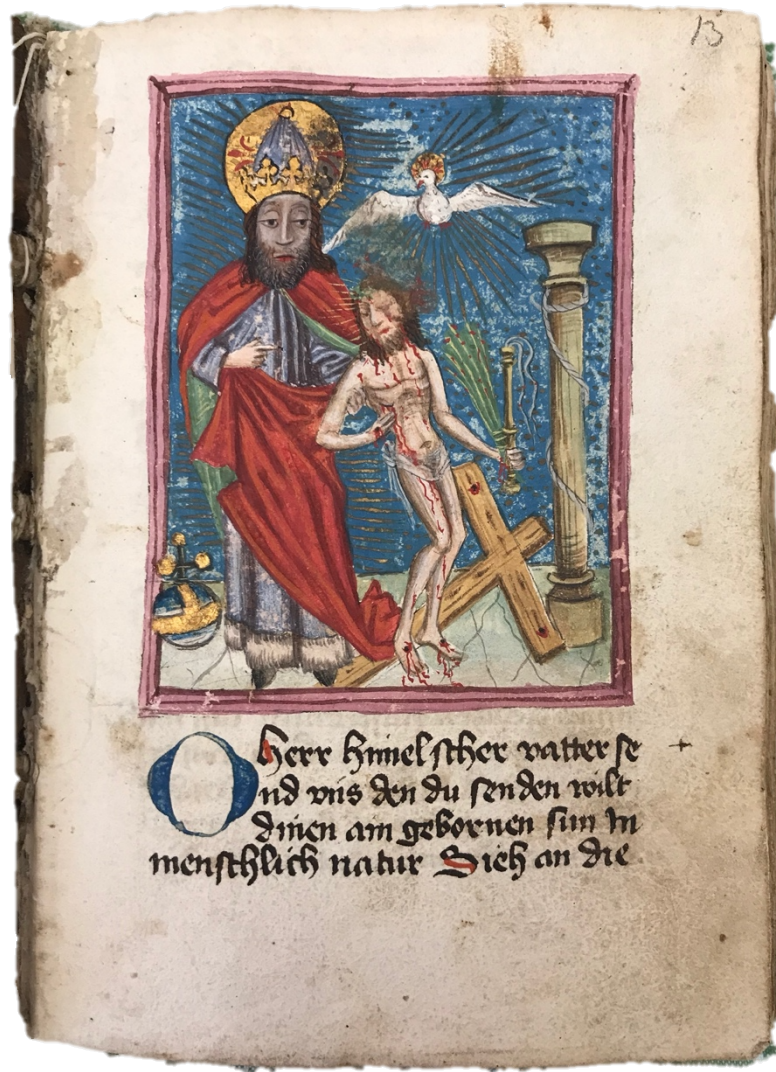



○ Herr himelscher vatter send úns den du senden wilt dinen ain gebornen sun in menschlich natur Sich an die<sup>19</sup> [14] betrüpnus dins volks. kum und erlös uns von unsren sünden als du úns verhaissen hast herr erweck dinen gewalt und kum das wir von den nöten únsrer anligenden sünden gerúchint von dinem schirm erlöst und behalten werden ○ herr erweck unsrer hertzen in inhitziger götlicher minn und liebi ze beraiten den weg dinem ain gebornen sun Also das wir durch sin hailgen zü kunft dir gerúchint mit lutrem gemüt dienen da durch du gelobet werdist in zit unnd in ewikait

ain güt gebett

○ Himelscher kúnig und ruher milter vatter ○ ewiges liecht kum(m) und erlúcht mins hertzen finsternus. lass mich nit lenger vergen. kum(m) wiser artzat und salb min wunden der sünden. mit dem öl diner grundlosen erbarmhertzikait Tillg [15] und verstrich in mir die schuld miner grössen sünd ○ We miner toerechten begirden. wie haind ir mich so lang betrogen ○ begird miner ewigen sálikait wie bist du so spat kom(m)en ○ wie sind min begirden so blind gewesen. wie bin ich so krúmen weg gegangen Ach darumb minnricher ewiger gott so bitt ich dich durch das inneclich gruntlich an rúffen diner hailgen patriarchen und propheten Und dúrch ir grös begird so sy hattent nach diner hailgen lieplichen gegenwertikait das du min blinden begird uff tugist und mit diner gnaudrichen zü kunft min láwes kaltes hertz entzündist Und nach dir begirig machist in inbrúnstikait diner götlichen liebi das in mir erlösch und torri alles das an mir missfellig sig Amen

An dem Sambstag [16]

An dem Samstag der andren wuchen in dem advent singt man zü dem Magnificat. also Als aber ain hailiger prophet rúfft zü gott. und spricht also Kum(m) her(r) und gesieh uns in dem frid das wir úns vor dir fröwint mit vollkommen hertzen<sup>20</sup> Aber Spricht ain prophet Nement war der herr kunt und all sin hailgen mit im und sy gond us von iherusalem als die rainen wasser und der herr wirt richßnen uber alle geschlácht<sup>21</sup> Der herr kunt mit krafft und hat das rich in siner hand und gewalt und fürsten túm<sup>22</sup>

Das Erst Responsorium

---

<sup>19</sup> die steht in der Handschrift zweimal.

<sup>20</sup> Vgl. *Veni domine visitare nos in pace ut laetemur coram te corde perfecto*. Dom. 2 Adventus, First Vespers, Antiphon, Cantus ID 005321.

<sup>21</sup> Vgl. *Ecce dominus veniet et omnes sancti ejus cum eo et erit in illa lux magna et exibunt de Jerusalem sicut aqua munda et regnabit dominus in aeternum super omnes gentes*. Dom. 2 Adventus, Matins, Responsory, Cantus ID 006586.

<sup>22</sup> Vgl. *Ecce dominus cum virtute veniet et regnum in manu ejus et potestas et imperium*. Dom. 2. Adventus, Matins, Responsory verse, Cantus ID 006586b.

IHerusalem du statt gottes Du solt nit wainen won der herr hat ain mittliden dir und wil von dir hin nem(m)en alle betrüpnus<sup>23</sup> Nement war der herr úns beschirmer der hailig ysrahel und hat die Cron [17] des richs uff sinem hopt<sup>24</sup> und er wirt richsnen ewenlich Also spricht Ain prophet in unsers herren person Als die müter tröstet ire kind also wil ich úch trösten spricht der herr Und von der statt iherusalem Die ich erwelt hab komet úch trost und fröd<sup>25</sup> V(ersus) Und ir werdent es gesehen un(d) úwer hertz das wirt sich fröwen V(ersus) Ich gib das hail in syon und in iherusalem min gúnlich<sup>26</sup> Dis sah david an. mit größer danckberkait und sprach in dem Salter Herr ich minnen dich won du bist min stercki. Min festnung Min erlöser Min helffer. min beschirmer<sup>27</sup> Durch dieser minn willen gottes und siner lieben fründen Die so unmässenlich groß ist. so begät man die zü kunft unsers herren ihū xpī Und ist das selb zit gar gnadenrich Won in der alten E [18] wärent unser hailgen altvätter die patriarchen die propheten Die kúng die wissagen und alles volk gar in grosser begird und belangen nah der zü kunft des gewären messyas Darum(b) sy och tag und nacht gar mit inbrúnstiger minn und senender qual gebirlich uff rúftent zü gott dem himelschen vatter úns ze senden sinen ain gebornen sun der inen doch gelopt was Durch die propheten die da von gar süssenlich wissagetent un(d) us kuntent dem volk das er welti komen und sy lösen von iro gefancknus das was der ewig tot in dem sy und alles menschlich geschlácht wärent gefallen von der ungehorsami adams und also in des fygentes gewalt lagent gebunden wol fúnf tusent iår und nit enwistent wen(n) ir arbeit ain end solt haben Won sich das zit also verlengt hatt dár[19]um(b) rúfftent sy in der vorhell und och uff dem ertrich emßiclich uff ze gott um(b) erlösung Sy bekan(n)ten nit noch wie vil zites dar was das er komen sölt Sy wistent aber wol in welem zit des iars er komen und geborn solt werden un(d) das selb zit lágent sy inn und mit fasten und mit wachen und mit grosser kestgung irs lips begiengent sy die zü kunfft unsers her(r)en ihū xpī Wie und in weler wis die

---

<sup>23</sup> Vgl. *Civitas Jerusalem noli flere quoniam doluit dominus super te et auferet a te omnem tribulationem.* Dom. 2 Adventus, Matins, Responsory, Cantus ID 006290.

<sup>24</sup> Vgl. *Ecce veniet dominus protector noster sanctus Israel coronam regni habens in capite suo.* Dom. 2 Adventus, Matins, Responsory, Cantus ID 006613.

<sup>25</sup> Vgl. *Sicut mater consolatur filios suos ita consolabor vos dicit dominus et de Jerusalem civitate quam elegi veniet vobis auxilium et videbitis et gaudebit cor vestrum.* Dom. 2 Adventus, Matins, Responsory, Cantus ID 007660.

<sup>26</sup> Vgl. *Dabo in Sion salutem et in Jerusalem gloriam meam.* Dom. 2 Adventus, Matins, Responsory verse, Cantus ID 007660b.

<sup>27</sup> Vgl. *Diligam te domine virtus mea dominus firmamentum meum et refugium meum,* Dom. per annum, Matins, Responsory, Cantus ID 006453.

solt beschehen. als sy das durch den hailgen gaist bekantent und och wissagetent. Hierum(b) hat die hailig cristenhait geordnet das selb zit och ze begon. mit singen und mit lesen die zü kunfft unsers herren Und darum(b) sol der mensch das selb zit och halten mit fasten oder suss mit hailger übung und ie ettwas abbrechen im selbs und da mit so bereit [20] und schickt sich der mensch zü der wirdigen hohzit des minneclichen gebürtlichen tags unsers lieben herren ihū xpī

By dem andern sonnentag in dem advent ist och bezaichnet die zü kunft alß got der herr kom(m)et togenlich das ist haimlich in des menschen hertze(n) und gemüt und komet mit sinen gnaden als ain senftes tow Won als das tow fruchtber machet dz ertrich also wirt der mensch fruchtbar an allen tugenden an dir(r) zü kunfft zöget er sin erbärmd als er tett an zacheo und an matheo und an sancto paulo Und an allen denen die er ie gezoh mit siner erbärmd von irem süntlichen leben zü gütem leben Won nun sin erbärmd so groß ist So hab gantz zü versicht das sy dich niemer geläß. ob du ir mit flyß [21] begerest und an rüffest Dich ze ziehen von sünden ze gütem leben. Darnach soltu din leben richten in der wuchen sind sechs tag an denen solt du gott loben und fasten Den ersten tag fast und bitt gott das er dich rainge von dinen sünden Den andern fast das er dich tail haftig mache der siblen hailikaiten die er der cristenhait gegeben hat Den dritten vast und bitt gott das er dir geb die siblen gäben des hailigen gaistes die dich hailig machint Den vierden vast das er dir geb die siblen hopt tugenden an die nieman hailig mag werden Den fünfften tag fast dz er dir geb die acht sälligkaiten. Den sechsten tag fast das er wär machi an dir die siblen gebett die man bittet in dem pater noster.

Nun sprich die gantzen wuchen all tag diss gebett [22]

O Hymelscher vatter ewiger got Ich bitt dich durch das größ belangen und durch das in(n)eclich anrücken diner der hailgen patriarchen und propheten das du komen wellist in min sündig hertz un(d) in aller menschen hertzen der glöbigen. das wir bekert werdint von unsren sünden in denen wir ligent gefangen in den banden der bösen gaisten. und das din gnädigi erbarmhertzikait uns miltenclich well empfaen Und durch die zü kunfft dins ain gebornen suns uns wellist erlösen und durch rúw Und durch luter bicht uns bereitist das wir empfenglich werdint der gnadrichen zü kunfft dins geminnten suns unsers lieben herren ihesu xpī

○ Du unerschöpfenliche göti Sich mich herr an in der minn und in der liebi in der [23] ich uss dinem vätterlichen hertzen geflossen bin ○ du wallender ursprung aller götlichen gnaden durch gúß herr min türres hertz mit dinem süssen mayen tow diner götlichen gnaden das min sel grün und fruchtbar werd an allen tugenden. Herr in dem gericht diner gnaden so sieh mich an un(d) sieh mich nit an nach mine(n) werchen. me nach diner grundlosen erbarmhertzikait

Gib mir kintliche vorcht und wäre rúw um(b) all min súnd. Herr um(b) vah mich mit dem rechten arm diner erbärmd Won ich waiss wol das mich kain gerechtikait behalten mag me es mús tün das werch diner grundlosen erbarmhertzikait

#### Der dritt Son(n)entag im Adve(n)t

An dem dritten Sunnentag in dem advent so singt aber die hailig Cristenhait un(d) [24] ladet den herren frölich mit disem gesang an dem anfang der metti un(d) ist also Herr wir fordrent und begerent diner zü kunfft das du schir komist und entletgist das ioch unser gefancknus<sup>28</sup> Und ain hailger wissag wil úns aber trösten der spricht also Nement war der herr kunt und mit im vil menig tusent hailge(n) Und er hât an sinem claid und an sinem som geschriben Er ist ain kúng aller kúngen und ain herr aller herren<sup>29</sup> Und aber spricht ain prophet Bethleem Du statt des obrosten gottes uss dir wirt us gon der da herschet über ysrahel und sin us gang ist von dem anvang der ewigen tagen und er wirt gegrösset enmitten uff allem ertrich. Un(d) es wirt frid in unserm land wenn er komet<sup>30</sup> ¶ Er wirt frid reden zu den geschlächten und sin gewalt ist von dem mer zü dem mer.<sup>31</sup> Aber [25] sait uns ainer gar güte mâr und spricht ¶ Das zit ist nach das der herr komen wil und wenn er kunt so wil er all unser súnd werffen in die tieffi des mers Och wirt in sinen tagen uff gon die gerechtikait und über flüssiger frid Und in werdent anbetten all kúng der erd. alle geschläch die dienen im Och spricht davit der wirdig prophet in dem salter. O herr Min sel türstet nach dir<sup>32</sup> dem lebenden brun(n)en Wer ist diser brun(n) von dem yheremias der wissag spricht Sy habent dich lebende(n) brun(n)en verlassen und habent inen selbs systemen graben die in inen selber kain wasser mugent beheben<sup>33</sup> Wer ist noch dirr brun(n) der von im selb sprichet in der togni bûch Ich gib denen die da türstet das wasser des lebenden brun(n)en ¶ Dieser brun(n) was fünff tusent iâr versperrt un(d) me das er sich dehainen menschen [26] wie

---

<sup>28</sup> Vgl. Domine praestolamur adventum tuum ut cito venias et dissolvas jugum captivitatis nostrae. Dom. 3 Adventus, Matins, Invitatory antiphon, Cantus ID 001063.

<sup>29</sup> Vgl. Ecce apparebit dominus super nubem candidam et cum eo sanctorum milia habens in vestimento et in femore suo scriptum rex regum et dominus dominantium. Dom. 3 Adventus, Matins, Responsory, Cantus ID 006578.

<sup>30</sup> Vgl. Bethleem civitas dei summi ex te exiet dominator Israel et egressus ejus sicut a principio dierum aeternitatis et magnificabitur in medio universae terrae et pax erit in terra nostra dum venerit. Dom. 3 Adventus, Matins, Responsory, Cantus ID 006254.

<sup>31</sup> Vgl. *Loquetur pacem in gentibus et potestas eius a mari usque ad mare*. Dom. 3 Adventus, Matins, Responsory verse, Cantus ID 006254c.

<sup>32</sup> Vgl. Ps 41, 3: Sitivit anima mea ad Deum fortem, vivum [...].

<sup>33</sup> Vgl. Ier 2, 13: duo enim mala fecit populus meus me dereliquerunt fontem aquae vivae ut foderent sibi cisternas cisternas dissipatas quae continere non valent aquas.

hailig er was nie gemainsamet als er ietz tüt besunder die er aller höchst trösten  
 wolt denen gelopt er das er disen brun(n)en ettwen offnen welt **D**iss gelúpt  
 enbot er sinen kinden zü ainem trost by sinem wyssagen zacharias und sprach  
 also ¶ **E**s komet ain tag an dem ain brun(n) geoffnet wirt her davides gesind  
 das maint alle die die da recht rúw haind umb iro súnd als herr david hatt.  
**W**eles ist aber der tag an dem dirr brun(n) geoffnet wart das ist der hailig  
 karfritag **A**n dem diser brun(n) gegraben wart an fúnff stetten sin lips in siner  
 menschait. nach diser gelúpt durst die hailigen propheten und die wissagen also  
 ser das sy aller widerstreit schruwent und rúffent zu gott **U**nd sprach ir ainer  
**W**elti gott das du die himel zerzartist und her ab kemist [27] zü uns **U**nd aber  
 rúfft ir ainer mit ungedultigem belangen und spricht herr du hast den him(m)el  
 gespannen als ains kalbshut **A**ls ob er sprach der him(m)el stecket vola gnaden  
 un(d) kýmet doch ain tropff nit her ab ze úns in dis iämer tal **D**is geschray und  
 dise senliche clag und diser begirlicher durst. erbarmet got den vater und  
 sprach zü sinem sun als geschriben stät **S**un läß dinen brun(n)en us fliessen  
 und tail dine wasser an den strässen **D**o sprach der sun mit gehorsamem willen  
 als er darnach sprach in der menschait **V**atter din will werd und kam her ab  
**U**nd tailt sich nach des vatters gebott an den strässen. **W**on er vor dem tor ze  
 iherusale(m) die marter laid und den tod un(d) nit erstarb er in der statt.  
 besunder da vor an der sträss **D**arum(b) das er der lebent brun(n) offen und  
 gemain[28]lich wär allen denen die siner gnad begertint **D**iss sind die sprúch  
 un(d) die wis sagungen der hailgen propheten und der fründen gottes  
**N**un in diser dritten wuchen des adventes **S**o begät man das edel zit der  
 fronfasten **D**as man sol begon mit grösser andächt. mit betten mit fasten und  
 mit allen tugenden. als man hie nach geschriben(n) findt  
**O** **H**oher allmächtiger ewiger lebendiger gott du us geberendi krafft aller  
 vätterlichait uss dinem innresten abgründ bist du geberen dinen sun und wider  
 geberen dich in im uss diser gebürt ustringent und quilt úwer baiden  
 unbegriffenlicher lust in spilender fröd der hailig gaist der da ist die min(n)  
 úwer baiden in ainem **D**u selbs wesentlicher gott und usfluß aller gütí ich din  
 arme creatur naig mich [29] hútt demüteclich für din hohen wirdekait und  
 loben dich hohe allmächtige wesentliche drívaltikait drý personen in ainikait  
 ainiger ewiger gott ain leben ain ursprung **U**nd end aller dingen **I**ch lobe(n)  
 dich der minnsamen ansichtberlichait din selbs bild mit lust uns ze schöpfen  
 und nach dir ze bilden und durch dich úns wider in dich ze laiten in ewiger  
 ursprunglichhait und ainfaltiger gelichait die sich zwúschent diner hohen  
 göttlichait vergiecht in unser geschaffenhait hierum(b) wir din geschaffnen  
 creaturen dich vatter allmächtiger verichent und anrúffent **A**ch ewiger  
 allmächtiger vatter nun verschmäch nit mich din creatur dich unbekanten got  
 an ze betten und din vätterliche gnad mir und allen menschen ze fordren und

begeren hírumb ich [30] mich mit ernst und begird naig für din hohen wirdikait  
 da us schmilztet din grundlose erbarmhertzikait die ich an rüff und begeren  
 Das du dich vätterlich wellist erbarmen über mich und über alle menschen und  
 úns gnädenlich vergebist das wir so unbekanntlich und blintlich und lawelich  
 wandlent in dem zit der gnäde(n) das du úns so vätterlich verlihest darumb ze  
 erwerbent Unnd ze gewinnen unser ersten feyghait die frödrichen glou die du  
 úns darnach berait hast Und wir dich so mit manger grösser schwärer súnd so  
 schwaurlich enteret und din vätterliches hertz erzürnet on underläß. ach und  
 wir so clain oder nüt enachtent der hohen Und der wirdigen gaben un(d)  
 gnaden so du nun so rihlich un(d) vätterlich úns gegeben ist und [31] wir der  
 so unempfunglich sind und du úns doch darzu hast geschaffen von diner fryen  
 güti aller diner gnad und gaben ze wartent und ze empfhent in frödenreicher  
 niesung Ach und wir úns hier in so undanckberlich gegen dir haltent und  
 grössenlich gegen diner gnad verschulden mit unsern súntlichen gedencken  
 Worten und wercken mit sel und mit lib mit únsren obren und indren krefft  
 mit ussren und indren sinnen mit allen creaturen die du úns ze nutz un(d) frucht  
 geschaffen hast die niessent und bruchent wir súntlich unordenlich und  
 undanckberlich Und mit allem dem das wir sind und haind und niessent und  
 besitzent das wir alles billich in danckberkait in dinem lob soltent uff trage(n)  
 Da mit verschuldent wir úns großenlich gegen dinem götlichen lob [32] das  
 wir manigvalteclich enterent und da mit wir din vätterlichen hulde soltent  
 erwerben Da mit beholent wir dinen zorn. Hierumb ist unser ellend groß und  
 unser krankhait und gemessenlichait. so ist doch din barmhertzikait  
 unerschöpfenlich die ich mit ernst an rüffe und bitt dich hoher gott  
 demüteclich Das du úns hütt dinen armen diener und dienerin wellist gnädig  
 sin und ablässig únsrer súnd da mit wir úns gegen din(er) gnad on underlās  
 verschuldent Eya ewiger vatter tû hütt uff die schöß diner erbärmd un(d)  
 empfeh uns rúwenden gnädenlich entschluß uff din vätterliches hertz und läß  
 herab towen in dis wainend tal úns dinen armen krancken schuldnere gnad und  
 vätterliche miltekait. Gib úns ewiger vatter bekantnús [33] dich ainigen gott  
 warlich ze beken(n)en und inbrúnstenlich vor allen dingen ze minnend und  
 festenlich im globen im an ze hastent Ach sterck úns mit diner crafft in unser  
 grössen kranckhait alle súnd ze vermeiden und din lob ze volbringent und alles  
 unser leben nach dinem götlichen gefelligen willen ze vollenden O himelscher  
 vatter won ich nu hie in disem iomertal in grösser kranckhait miner gebrechen  
 inschuldigen lig Darum(b) ich mich gegen dir nütz vermag für mich und den  
 menschen in kainer danckberkait aller diner gaben und gnaden. Hierum(b) rüff  
 ich hütt an die himelschen kúniginnen marien die bri(n)nenden seraphin die  
 minnenden cherubin die durchlúchtenden gaist aller engel und menschen die  
 vor diner angesicht stond in unussprechenlichem yemer weren dem lob und

glori diner hö[34]hen maiestät das sy dich ewigen vatter hütt danckberlich lobint und erint für úns armen und vermugen umb alle **D**in gnäd miltekait und güte und grundlosen erbarmhertzikait so du úns on underlās erzögest und úns enthaltest in gesunthait und in kranckhait úns sterckst in vernunfft und in beschaidenhait úns behütest und úns únsere nottürfft in allen dingen zü fügest **U**nd únß in únsere blintlichen leben so wissenlich für kumest und so vätterlich úns yegliches besorgest nah dem besten und úns ze cristenlichem globen hast gerüft und gemeinsamet alles dins güttes **D**as wir rúw gnad und ablas mugent vinden wen(n) wir es begerent und mit ernst sůche(n)t und du úns so lang und so milteclich enthaltest in únsere sůnden und so gütlich und langsam baitest únsere bekerung und ob allen dingen [35] sig dir lob und eer gesait das du uns dinen ain gebornen sun hāst gesen(n)t uns ze erlōsent durch den **U**nd in dem tragent wir úns uf in din vätterliches hertz alles unser vermugen alles lobs und danckberkait aller diner götlichen gāben un(d) gnāden in im und durch in gegen dir ze verwesen und gantz aller únsere schuld und gebrechen nach dem gefelligosten dins vätterlichen hertzen für úns gnüg ze tůnd in allem lob un(d) glori **A**ch ewige hohe drivaltikait ich loben dich von allen krefftē miner sel dry personen in ainigkait ainiger und ewiger got ain leben ain ursprung ain uffenthalt aller creaturen **I**ch bitt dich du lebender brun(n) durch das überflüssig ewig güt das du in dir selber bist und usgiessen bist allen creature(n) das du mich und allen menschen luterlich adellich werdechlich und vol[36]komechlich wider in laitist in unsern ersten ursprung in dich und úns wider bringist als wir dir ewige hohe dryvaltikait aller bast gevalent un(d) als du ains bist dry personen in ainer gothait das du úns gebist das wir von gnaden ains mit dir werdint un(d) in der gnad úns gebist das wir ewenlich bestāt werdint **A**men

**A**n dem fritag der fronvasten soltu mit grössem andächt un(d) begird das wirdig liden únsere lieben herren betrachten und üben mit gebett mit vermanungen mit fasten mit wachen mit allem dem das dich zü andächt geraitzen mag und gefürdren und darin ain begirlich dankberlich uff tragen haben des wírdigen lidens uns sterbens und costbaren verdienens ihū xpī und dich mit min(n) und begird darin sencken und der hohen edlen frucht begeren für dich un(d) alle menschen lebent und tod ze ge[37]mainsamend nach aller minn als er úns das begert und maint und gegeben hāt nah aller rilicher volkomenhait an dem tag sins todes un(d) ellenden hinschaidens das die frucht wārllich ernúwret werd da durch wir alle únsere schuld bezalint und ewenlich mit im veraint werdint<sup>34</sup>

---

<sup>34</sup> Es folgt eine leergebliebene Zeile.

O Du abgrüntliches ewiges güt und du ursprung aller wesenheit wie ist die tieffi diner wyßhait so unbegriffenlich wie ist din würcken so verborgenlich und din weg so unbekanntlich O us geberendi krafft des vatters wie hast du dich us geborn und so milteclich gebraitet durch din ewiges wort in alle geschaffenhait O du ursprüngliches ewiges wort geborn von dem vatter wider in den vatter in ewiger ain geborner sünlichkeit O du uffbrechendes morgenrot und du durch [38] schinender glanz der ewigen sun(n)en wie hast du dich mit dinem claren schín us glestet und durch schynen alle ding in rihlicher min(n) fliessender gnad und süss mütikait dins götlichen gaistes Owe tieffi wyßhait wie wislich du hast alle ding an gesehen ze schaffent ze machen und yeclichs uff sin höchsten gelichhait zebringen. besunder die irrenden verwornen menschait die under aller geschöpfft von ir nächsten gelichait aller ferrest gevallen un(d) verwornen was Ach die häst du nu mit diner ewigen fürsichtigen wyßhait aller adelichost und zierlichest wider uff erhaben und getriben in ir nächsten und höchsten gelichait ob allen creatures Eya disem hohen über treffenlichen min(n) túren würcken du ewiges wort dich häst ergeben willeclich das ze volbringen in der brunst der minne in der du dich [39] so tieff hast genaigt und Verraint mit únsere menschait in der du alle únsere kranckhait uf dich und an dich nempt die ze sterken und ze wider bringen und úns ze laiten in únsere ersten fryhait. Ach tieffe min(n) wie bist du so unergrüntlich das du dich hoher adel so tieff sancktest in únsere unwirdigen schnödekait die du doch nit verschmähest dich zú úns ze gesellend Diese tüffe demütikait du úns wol bewytest in dem ersten in gang in dis welt diner gebúrt die hoh über natürlich edel und wúrdig was und wunderlich fröden richlich beschach und doch in tieffer armút in verworffner Demüt in unbekanntnem ellend und gelassenhait aller der dinen was erschýnen Und doch als gott und mensch erzögen und das selb in allem dinem leben in kinthait in wachsen[40]hait in alter manigvalteclich wárt liden und senffteclich tragen us wendige arbeit emsige dienstberkait un(d) zufellige ungelichait von aller menschen unbekanntthait und unverstandenhait us der sy dich gar pinlichen durch áchtend trucktent und verschmächtent und alles din lieplich gnadenrich würcken nah grim(m)ekait in figentschafft irs hertzen in alles unrecht so bärlich verkertent Ach gemin(n)ter herr und. du dar wider gegen inen dich so min(n) samclich wárt erbietten nottürfteclichen in allen sachen inen hilfflich ze sind mit dinen loblichen wunderbaren zaichen die manigvaltigen gebresten und kranckhait der menschen so gnädeclich hailest und wider bracht und ernúwrot und erkicktest in sel und in lib Owe aller getrúwester herr und miltester vatter wie [41] hast du es gesehen on alles Volbringen úns zú so grösser nutz und dir zú so pinlichem schwörem us tragen Ach und wir dz nun so úndanckberlich an sehent und so wenig enachtent der grössen unzalichen minn gegen úns Owe



únsrer grössen blintheit und groben unverstandenhait in der und mit der und  
 usser der wir dich so dick us tribent uss unsrer hertzen und gemüt wie dick du  
 dich úns mit diner gegenwirtigen gnäd erbietest und únsers gunstes und willen  
 begerst **D**as wir diner minnsamen fordrung versiechst und alle únsrer  
 gedencckwort und werck min(n) und mainung inwendig und uswendig wirt  
 alles natúrlich und creatúrlich zitlich und zergenglich in wandelbarer  
 manigvaltikhait volbrächt und din und aller diner min(n) vergessen **O** aller  
 getrúwetestes [42] hertz und du uns so tieff in dir hast getragen mit emsigem  
 an sehen ain iecliches als ob wir do ze mal gegen wirteclich vor dir und by dir  
 wärint gesin also häst du iegcluchs besunder und och uns alle gemainlich  
 geminnet **U**nd gemaint in allem dinem würcken und volbingen des selben glich  
 únsrer iegcluchs schuldig ist im besunder für sich selb. dir aller diner minn  
 danckber ze sind nah allem únsrem vermugen in lib in sel mit allen únsren  
 krefft inwendig und uswendig **A**ber hier in gebristet únsrer kranckhait und  
 unachtsamkait unzallichen vil gegen dinem wirdigen volbringen darum(b) wir  
 och schädlich verderbent und vil und dick **H**ier us belibent das wir aller diner  
 costbaren gnäden und gäben und hohgültiges und wirdiges verdienen [43] nit  
 empfanglich mugent gesin **A**ch darum(b) du abgrüntliche tieffe minn. mins  
 getrúwen herren ihū xpī. brich hütt uf von dem abgründ dins vätterlichen  
 hertzen und läß dich milteclich vergiessen über úns din arme kind die du doch  
 so sur erarnet häst **U**nd verzih úns milter vatter únsrer grössen schwären enteren  
 so wir on underlās tünd mit únsren sünden und únsrer undanckberkait und  
 verrüchtsamkait aller diner unmässige(n) min(n) gegen úns **A**ch getrúwes hertz  
**V**ergib úns das wir dich so vil erzürnent und únsrer hertz und gemüt von dir  
 kerent und mit unserm gunst und willen úns wider dich und alle din gebott und  
 rát setzent mit únsrem súnlichen leben und dich aller höchstes güt so bärlich  
 lāssent **A**ch das [44] din edels getrúwes hertz wol bekent und an gesehen hat  
 von úns und dir pinlichen schmerzen bracht **E**ya gemin(n)ter sieh an diss únsrer  
 grössen blintheit und erlucht úns mit dines gaistes liechtrichen bekantnus **D**as  
 wir dich hohes ewiges güt als únsrer ursprung und schöpffer bekennint un(d)  
 als únsren ainigen got und her(r)en allain anbettint und verichint un(d) als  
 únsren milten vatter und erlöser von gantzem hertzen min(n)t **O** edle gotriche  
 minnende sel ihū xpē **W**ie so uss grösser minn und hitziger begird du dich für  
 úns geben un(d) geopffret häst so über treffenliches schwäres liden in dem du  
 on underlās wärt von dem ersten nun diner geschöpfft in mütter lib bis in din  
 bitter sterben **O**we wie besintlich du alles liden ansächt das din lutre menscheit  
 und zarten lib solt zü fallen mit menger strengen [45] not die du soltest und  
 würdest mit im liden **A**ch darum(b) so rüff ich mit hertzclichem bitten und  
 flehen von dem grund mins hertzen zü dir ainiges ewiges wort und ain geborner  
 sun des himelschen vatters **D**as du die selben hohen din ungemessen ewigen

minn úns gnädenlich wellist mittailen und ze frucht und ze statten lăssist  
 kom(m)en năch der begird in ainung in der du sy úns gewürckt und volbrăcht  
 hast. **B**is únsêr getrúwer verweser gegen dinem himelschen vatter **O**we lieber  
 herr vergiss nit also gar úns diner geschöpfft und armen hand getăt erzög dich  
 gnädenlich sieh úns an in der liebi in der du durch unsern willen mensch bist  
 worden und geborn in diss welt und für úns und durch úns gelitten und  
 gestorben bist **A**ch opffer dich hútt mitt allem dinem wirdigen fruchtbaren [46]  
 leben. gedencken worten und werchen und mit dem notlidenden emsigen  
 getrang alles inwendigen lidens diner minnsamen sel und uswendigen  
 unmăssigen schmerzen aller tieffen wunden und blút vergiesse(n) dins zarten  
 libs und mit dinem hailigen tod dinem himelschen vatter für mich und alle  
 menschen un(d) für alle únsêr sünd mit denen wir dich so schwărlich enterent  
 und úber sehen **O** we grundlose liebîn empfah úns hútt in dasselb wirdig liden  
 und opfer in dem du dich in allem dinem liden und sterben opffrestest für úns  
**O** ewiger himelscher vatter empfah hútt dinen ain gebornen sun mit allem  
 min(n) túren kostbaren verdienen für úns menschlichs geschlăcht **A**ch únsêr  
 kranckhait und unwirdige schnödikait ist so vil das wir úns vor dinem hohen  
 adel un(d) almăchtikait und herschafft nit [47] getürent erzögen den in durch  
 in und mit im getruwent wir wider in ze koment in dinem vătterlichen gunst in  
 dem wir begerent gegen úns armen cristenen versünt ze werdent alles dins  
 zornes **O**we milter vatter enthalt uff das schwert dins grim(m)en zornes und  
 lăss ab die grim(m)en plaugen in denen und mit denen wir so pinlich und  
 mengvalteclich getrukt und dűrch ächt werdent und ellenlich in únsêrn sünden  
 verderbent **A**ch alle angstlichen notlidenden arbeit in tieffer arműt. in ellend in  
 hunger in tűrst in kranckhait in frost in hitz in grössem gepresten und mangel  
 aller armen menschen und iunger unschuldigen kinder so sy tragent und lident  
 sig dir begirlich uff geopffret und lâß es ain schryen und ain rűffen sin zű diner  
 vătterlichen miltekait die ze bewegung gegen úns **O**we grundlose  
 erbarmhertzi[48]kait entschlűß dich uff gegen úns wann es nie so not getet **A**ch  
 erweck dinen gűtlichen gaist in den hertzen der verkerten ungelobigen die so  
 grűssenlich richsnent und lăss dinen hailigen nam(m)en nit also undergon  
 sterk die hand dines gűtlichen gewaltes úber din armen verwaisten cristenhait  
 die mit so grűssen plaugen und stricken an gestűrmp̃t und an gefochten wirt  
**A**ch gedenck das du sy so fur erarnet hast und mit dins hertzen blút so tűr erkof̃t  
 und dir selbs wider geporn zű ewiger gemahelschaft **E**ya hohe allmăchtikait  
 gib gewalt crafft sterke wyßhait liebi und gunst aller gaistlicher weltlicher  
 fűrstlicher und ritterlicher wirdikait sy beschirmen das úbel ze trucken das gűt  
 in veriehen din gűtlichen nam(m)en für ze bringen das in allen landen und  
 stetten der **C**ristenhait frid und gnad in [49] allen sachen versprochen gesetzt  
 und bestătiget werd in gantzer ainberkait aller lűt und land nottűrftenclich

zitlich und gaistlich **A**ch din hailig über wirdig costbaren verdienen sye alle zit in den hertze(n) der glöbigen fruchtigen úns von únsern sünden zebekeren und tugent ze übert aller únser gedenck wort und werck úns verdienlich und dir loblich ze machint nâch allem dinem göttlichen wol gevallenden willen also das wir mit allen englen und hailgen in iemer werender fröd und lustlicher wun(n) dich in götlicher maiestet werdin schowen da du richsnest mit got dem vatter und dem hailge(n) gaist von welt zü welt **A**men

**A**n dem Sambstag der fronvasten eret man got den hailigen gaist und der selb tag wirt im zü gelait darum(b) das [50] ampt der mess gar ordenlich ist an gesehen ze volbringen **D**arum(b) man singt und liset von wunderbaren wercken des hailgen gaistes das er durch die propheten in wissagung verkündet und gesprochen un(d) ouch volbrächt hât uff disen hailgen sabat werdent die siblen sacrament und die hailikaiten des hailigen altars ernúwret mit wihen der priester **D**er leviten der dyacon den töff und alles das zü dem ampt der hailgen mess und des götlichen dienstes gehört. **H**ier umb diss gaistlichen in dir ze volbringen so soltu mit hertzen un(d) mitt gemüt in din inwendikait **D**ich keren und gar aigenlichen an sehen wie du bist gesin un(d) den(n) ze mal standist wie vil du dich der gnäd des vermanung des hailigen gaistes underzogen und welhe sach dich dins götlichen würck[51]ens aller maist hab gehindert dz solt du mit rúw clagen und dich mit starcker züversicht zü siner milten güti keren und getruwen dir dar in alle din sünd ab ze lăssent won er ist allain der unentheblich richlich usfluss aller güti und erbärmd **A**ch die by núnti sich mag enthalten er müß er müs<sup>35</sup> sich geben denen die sin begerent besunder och uf das zit won was wir got den vatter haind an gerüfft und begert an sine hohen allmächtikait und an gott den sun in siner tieffen wyßhait. **A**ch das gússet und tailt us der hailig gaist mit siner vollen güti ieclichem nach siner begird nottürftenclich darum(b) sum dich nit rüff an got den hailigen gaist dich ze erlúchten ze sterken ze für komen mit den siblen gaben sins gaistes beger och mit ernst aller der frucht der siblen hailikaiten die uff den tag [52] besunder ernúwrot werden und gewihet und aller der frúchten so die gnad **D**es hailigen gaistes ie gewürckt in alter in núwer zit und noch iemer tüt in allen sinen us erwelten frúnden **D**as die hútt in dir gewihet und gehailget werd und in allen menschen leben den ze fruchtbarkait und den tóten zü ewiger rúw beger och gelútret ze werden und geraingot von allen mäsén und senck und truck dich mit allen dem das du bist mit allen dinen krefte(n) in die min(n)fluss siner gnaden das die krafft diner sel núw geschöpft werdint in ain formlichait sins gaistes und alle din übung wissen worten gesang und volbringen inwendig uswendig **D**aß bis dar in lawer kalt

---

<sup>35</sup> Doppelung; vermutlich ein Schreibfehler.

und vertrossner kalthait<sup>36</sup> traghait und wytschwaiffikait hast geton und volbracht Das das nun [53] mit dem für siner minn werd erhúzet das das nun alles fürbas von dir in minn in ernst mit flyß in lobricher danckberkait werd geton und volbracht und mit allen hailgen krefftigen worten und segen die des tags gesungen un(d) gesprochen werdent ob für ob wasser ob priestern ewangelier un(d) ob allem dem das des tags gehailget und gewihet wirt zü dem götlichen dienst in aller cristenhait das du och da mit gesegnot gewihot und gehailgot werdist gaistlich núw empfahen die gnad des hailgen gaistes in dir ze würckent nah sinem höchsten lob und götlichen dienst in crafft in stercke in gnadricher úbung bis an din end Amen

Och in dem zit der fronvaste(n) so list man das hailig ewangelium Als der wirdig engel [54] gabriel únsere lieben frowen Verkündt das ewig wort Darinn der cristenhait ze verstend wirt gegeben Wie got menschlich natur an sich nam in dem rainen iunckfrowlichen lib marien von dem list man also Do gott den vatter das ellend anrúffen siner gemin(n)ten frúnden in der alten e erbarmet als vor gesait ist Do wart got des in ain in dem rät der hailigen drivaltikait das die mittel person in der gothait das ewig wort mensch sölti werden Do sprach got der himelsch vatter ist ieman hie der mir den menschen erlös von sinem tieffen fal den ich geschaffen han nach minem götlichem bild Do antwürt das ewig wort des vätterlichen hertzen un(d) sprach Vatter ich wil gon in den tod und durch den tod umb das ich den menschen erlös von [55] dem ewigen tod Do sprach got der vatter zu sinem ain gebornen sun So wil ich das du haltist dise zwölff gebott von mir Das erst Ich wil das du gangist uss wirdikait un(d) uss fröd in armút und in verschmácht und menig ellent herberg un(d) das du an dich nemist das bild des sünders und in dem völlenlichen schinist Das ander Ich wil alles das. Das die wissagen von dir gewissaget haind und ich gesprochen han durch sy das das alles in dir erfüllt werd mit den werchen Das dritt Ich wil alles das ich bin mit dir. und du bist mit mir. das du. das glig<sup>37</sup> glich tailist den bösen und den gúten Das vierd Ich wil das din lösendi hand die geschöpfften hand nit zwing und ainen yeglichen lássist in der feyghait als ich in geschaffen han Das fünfft Ich wil dz unschuld [56] geschuldget werd umb das alle schuld geunschuldiget werd Das sechst Ich wil das du sygist ain kúng und haissist ain kúng und dir doch kúngliche ere niemer erbotten werd den(n) zü ainem mal und das beschah an dem balm tag Das sibent Ich wil das din götliche er sy under menschlicher er und din götlicher gewalt under

---

<sup>36</sup> Unterpungiert.

<sup>37</sup> Schreibfehler. Hier wurde sehr wahrscheinlich vergessen, das von *glig* zu *glich* korrigierte Wort nachträglich durchzustreichen.

menschlichem gewalt **Das** achtent **Ich** wil dich geben in der iuden gewalt und wil das sy an dir erfüllint allen iren gewalt und allen iren willen **Das** núnd **Ich** wil dz du ain bekennen habist alle zit diner martrer und dins todes um(b) das dir din tod dester bittre syg un(d) menschlichem geschläch dester nützer **Dz** zehent **Ich** wil das du din marter und dinen tod lidist on all himelsch helff **Das** ainlift **Ich** wil dir din leben abbrechen in der allen besten blüst da du iemer in kom(m) macht [57] das was by den vier und drissig iaren **Das** zwölfft **Ich** wil das din marter und din tod ain schloss und ain über gúlt sig aller töd und dir doch dins todes niemer gedancket werd **Därum(b)** sprach got wol durch des wissagen mund ysayas cläglichen zu menschlichem geschläch **O** mensch ich müss dinen sünden dienen und du hast mir gross arbeit gemacht mit diner ungerechtigkait und aber so spricht ysayas in der person únsers herren und clegt da úns erkanntus und úns undanckberkait und spricht **Ich** han um(b) suss gearbaitet und han min stercki uppeclich verzert<sup>38</sup> **O** das mocht er wol sprechen von denen an denen sin wirdiges túres verdienen liden und sterben ewenlich würd verloren werden

#### der dritt Sonnentag

By dem dritten Sonnentag [58] in dem advent ist bezaichnet die zü kunft als gott der herr kunt zü des menschen end. hie kunt er als in ainem sturm und schaidet die sel von dem lib und tailt das er da vindet **Den** lib git er der erd und den würlen **Das** güt lát er der zit und den frúnden **Die** sel git er den englen oder den bösen gaisten **Also** kunt er zü des menschen tod mit siner warhait und das úrtail das er über **Eva** gab das bewárt sich da **Won** wir alle von dem flúch tödemlich worden sind und in angsten sterben **Diss** sich an und betracht flissenclich und bewar din leben **Dz** du in gnaden funden werdist **Und** beger das er din end güt und sálig mache ¶ **In** der wuchen sind sechs tag die solt du fasten **Den** ersten tag fast das got zü dinem end kom **Den** andern. **Das** er dir [59] geb ain verstanden hertz un(d) ain bekan(n)ti sel **Den** dritten **Das** er dir geb wære rúw und lutri bicht **Den** vierden tag. **Das** er dir geb din súnd ze büssen und niemer me kain ze tünd **Den** fünfften tag. **Dz** er dir sinen hailgen fronlichnam geb. **Den** sechsten tag. **Das** er dir geb das hailig öl ¶ **Nun** sprich dis gebett all tag durch die wuche(n)

**O** Du uff brechendes wort des himelschen vatters **Wie** häst du dich so gar von überwal und unmässiger minn **So** ferr herab von der hohen diner gothait genaigt und gesenckt in die tieffesten nidri der menschhait **Als** du dich mit

---

<sup>38</sup> Vgl. Is 49, 4: Et ego dixi: In vacuum laboravi, sine causa et vane fortitudinem meam consumpsi [...].

geschaffne(r)<sup>39</sup> sel und wol geformeten lib gantz und gar veraintest. mitt der menschait in marien lib **D**is hohen werchs werchmaister wärt **D**u hailiger gaist **U**nd so [60] gar inbrúnstenelich mit dem haissen flam(m)en diner minn die sel dz hercz und gemüt marien wärt enzündē mit dinen unzallichen minn fliessenden gnaden und gäben mit denen sy versanck in dz götlich wesen

**Von der geminnten Sel cristi**

**O** **D**u vergöttendi hohe **E**dli wirdigi minnen sel únsers lieben herren ihū xpī **I**ch ermanen dich der bekantnus der gegenwürff alles dins kúnfftigen lidens so du hattest in diner wirdigen mûter lib ain stättes ansehen **U**nd dis alles din inwendigs und din ußwendigs liden solt un(d) würdi mit dem pinlichosten verschmächtesten tod des crützes volenden **A**ch wie mit so grösser begird du dich dar gegen so tieff naigtost in den willen dins himelschen vatters und dinen hailgen rug[61]gen demüteclich wärt darunder búgen **E**s alles durch úns un(d) für úns ze liden und ze tragen **E**ya du wirdiger gottes sun wie so us gröser minn du für úns gefangen un(d) in beschlossē ligest in dem zierlichen tabernakal und wonung des mägtlichen libs marie

**Von Marien**

**E**ya userwelti kungcliche dochter des himelschen vatters geschwangret von würckung des hailigen gaistes **D**u traist beschlossē in dir wonend und wachsend in blüyender zarthait den kúngclichen iúngling **D**es anvang und alter än end. ist nieman bekannt [62]

---

<sup>39</sup> In der Handschrift steht *geschaffnem* mit einem *r* über dem letzten *e*. Wahrscheinlich eine Korrektur, bei der die Radierung des *m* vergessen wurde.

[Miniatur: ‚Verkündigung‘, mit Nennung des Johannes Sattler: ANNO  
SALVTIS 1482. JOHUS SATLER PBR ME FECIT]

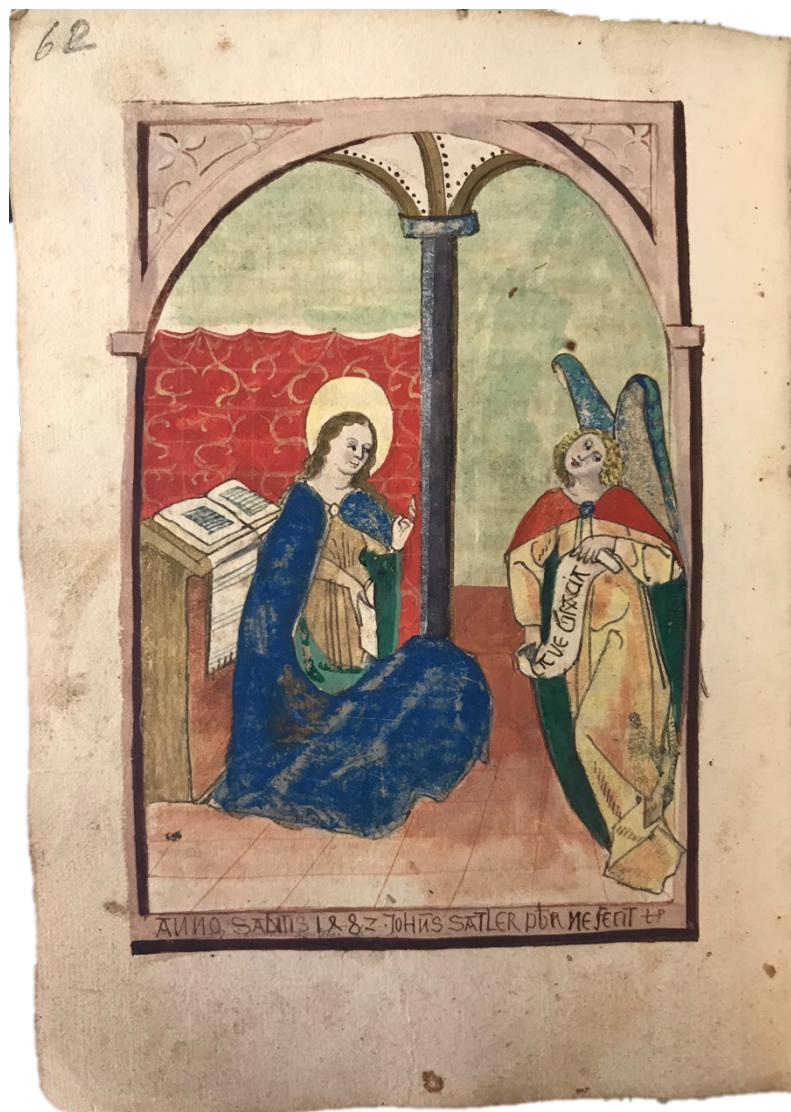



[63] **O** **G**ott himelscher vatter ich rúff hútt mit allen patriarchen und propheten zü diner vätterlichen miltekait die mir und allen menschen ze erzögen **A**ch din erbarmhertzigē ädren tügent sich uff un(d) fliessint mit gnaden in únsri hértē hertzen und gemüt die ze erwaichen in empfanglichait der zü kunfft dins ewigen wortes **D**as die in únsel kreft vind beraitschafft in gewarer luterkait und unschuld aller sünd das ewig wort sigint empfahen und mit inbrünstiger minn alle zit vor den ogen únsel bekantnus tragint un(d) mit volkomner übung der tugend in getrúwer dienstberkait úns dir ainges lieb und gemin(n)ter sun und in beschlossē gefangen kindli in mägtlichem lib also willēnlich erbietint das dich gelust begirlich by úns [64] ze wonen und in úns. mit diner gnadrichen gegenwirtikait von der und durch die únsel kreft hertz un(d) gemüt von kraft dins götlichen gaistes geschwangret und erfüllt werdint und darin(n) alle zit zü nemint un(d) wach sind in aller richait un(d) gnad in der wir mit dir veraint werdint ewēnlichen **A**men

#### An dem vierden Sonnentag

An dem vierden **S**un(n)entag in dem anfang der metti verkündet úns die hailig prophecy der propheten frölichī mār das der herr kom und ladet alle **C**ristenlichī menschen das sy im mit begírd engegen löffint und sprichet alsus **Invitatoriu(m)** **E**cce venit rex **N**ement war der kúng kunt **W**ir sölent engegen löffen únsrem behalter<sup>40</sup> **S**ingent das her(r) horn in syon. rúffent den haiden. verkündent dem volk und sprechent ne[65]ment war **G**ott únsel behalter des wir lang gebaitet habent der komet<sup>41</sup> **V(ersus)** **V**erkündent und tünt kunt redent und rúffent<sup>42</sup> **N**ement war **G**ott únsel behalter komet **A**ber so spricht ain prophet **A**in clainer wirt úns geboren und er wirt gehaissen der starck gott und er wirt richsnen und sin fürsten tūm ist im gelait **uff** sin achsel.<sup>43</sup> in im werdent gesegnet alle geschlācht der erden und all haiden werdent im dienen<sup>44</sup> und er

<sup>40</sup> Vgl. *Ecce venit rex occurramus obviam salvatori nostro*. Dom. 4 Adventus, Matins, Invitatory antiphon, Cantus ID 001074.

<sup>41</sup> Vgl. *Canite tuba in Sion vocate gentes annuntiate populi et dicite ecce deus salvator noster adveniet*. Dom. 4 Adventus, Matins, Responsory, Cantus ID 006265.

<sup>42</sup> Vgl. *Annuntiate et auditum facite loquimini et clamate*. Dom. 4 Adventus, Matins, Responsory verse, Cantus ID 006265c.

<sup>43</sup> uff sin achsel ist eingerahmt von zwei roten Zierstrichen. Vgl. Is 9, 6: *parvulus enim natus est nobis filius datus est nobis et factus est principatus super umerum eius et vocabitur nomen eius Admirabilis consiliarius Deus fortis Pater futuri saeculi Princeps pacis*. Vgl. *Nascetur nobis parvulus et vocabitur deus fortis ipse sedebit super thronum David patris sui et imperabit cujus potestas super humerum eius*. Dom. 4 Adventus, Matins, Responsory, Cantus ID 007195.

<sup>44</sup> Vgl. *In ipso benedicentur omnes tribus terrae omnes gentes servient ei*. Dom. 4 Adventus, Matins, Responsory verse, Cantus ID 007195b.



ist ain schön bild über aller menschen kind **V(ersus)** Sini ogen sind húpscher  
denn der win und sin zen wysser den(n) die milch<sup>45</sup> **A**ber sprichet ain sáliger  
wissag also **N**ement war es kom(m)et únsér herr der fúrst der kúngen der erden  
**S**álig sind die berait sind im engegen ze löffen<sup>46</sup> **hauriens** Schöpfpent wasser in  
fröden von dem brunnen<sup>47</sup> [66] **O**ch vermanet úns ain wyssag wie wir úns  
söllent glich uff beraiten uff die fart und sprichet also **Consurge** **Consurge**<sup>48</sup>  
**S**tand uff stand uff leg an die stercki des arms dz ist der stercki dins herren  
**E**levare **elevare**<sup>49</sup> das spricht wird uff erhept heb dich uff **S**tand uff iherusalem

---

<sup>45</sup> Vgl. *Pulchriores sunt oculi ejus vino et dentes ejus lacte candidiores*. Dom. 4 Adventus, Matins, Responsory verse, Cantus ID 007224a.

<sup>46</sup> Vgl. *Ecce veniet dominus princeps regum terrae beati qui parati sunt occurrere illi*. Fer. 2 Hebd. 4 Adventus, Lauds, Antiphon, Cantus ID 002550.

<sup>47</sup> Vgl. Is 12, 3: *Haurietis aquas in gaudio de fontibus salvatoris*; ebenso: *Haurietis aquas in gaudio de fontibus salvatoris*. Fer. 2 Hebd. 4 Adventus, Lauds, Antiphon, Cantus ID 003020.

<sup>48</sup> Einsiedeln, Codex 283, S. 66. Vgl. *Consurge consurge induere fortitudinem brachium domini*. Dom. 4 Adventus, Matins, Antiphon, Cantus ID 001904; Is 51, 9: *Consurge, consurge, induere fortitudinem, brachium Domini*.

<sup>49</sup> Einsiedeln, Codex 283, S. 66. Vgl. *Elevare elevare consurge Jerusalem solve vincla colli tui captiva filia Sion*. Dom. 4 Adventus, Matins, Antiphon, Cantus ID 002633; vgl. Ebenso: *Elevare elevare consurge Jerusalem solve vincla colli tui captiva filia Sion*. Fer. 3 Hebd. 3 Adventus, Second Vespers, Antiphon, Cantus ID 002633; Is 52, 1-2: [1] *Consurge, consurge, induere fortitudini tua, Sion! induere vestimentis gloriae tuae, Jerusalem, civitas Sancti, quia non adjiciet ultra ut pertranseat per te incircumcisis et immundus*. [2] *Excute de pulvere, consurge; sede, Jerusalem! Solve vincula colli tui, captiva filia Sion*.

66  
 Och vermanet vns an wiffag wie  
 wir vns sellent glich vff beraiten  
 vff die firt vnd sprichet also Con  
surge Consurge Stand vff stand  
 vff leg an die sterck des arms dz  
 ist der sterck dms Herren Eleuare  
eleuare Das spricht wird vff er  
 hept heb dich vff Stand vff iheru

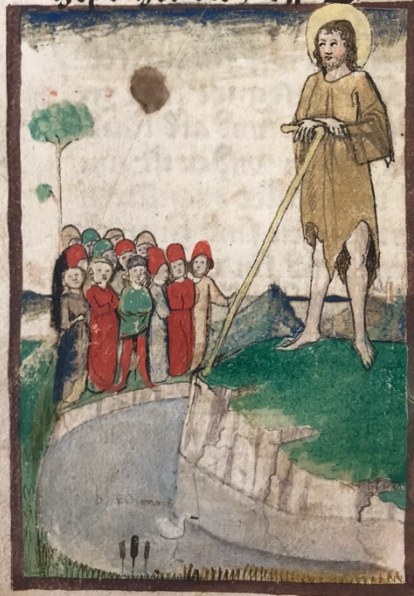

salem ent  
 ledig die  
 band dms  
 Halses du  
 gefangen  
 tochter von  
 syon Con  
solamin  
consolai  
 Also sp  
 richt got  
 durch des  
 wiffage  
 mund wer  
 dent ge

entledig die band dins halses du gefangin tochter von syon Consolamini consola(mini)<sup>50</sup> Also spricht got durch deß wyssage(n) mund Werdent ge[67]tröst werdent getröst Darum(b) sprichet er es zwürent Das wir getröst sond werden von siner gotthait und von siner menschait Won ich kum(m) schier und min lon mit mir und wil ieclichem geben nah sinen werchen

#### Der wyssag

Iecz komet ain gewisser bott der rüffet frölich und sprichet de syon veniet Von syon kunt der allmächtig gott Der her(r) Emanuel. gröss ist sin nam<sup>51</sup> Vigilate animo<sup>52</sup> Wachent an dem gemüt won in der náhi ist got únsér her(r). Nolite timere<sup>53</sup> Nit fürchtent úch won an dem fünfften tag komet zü úch gott únsér herr Die vili der wirdigen prophecien rüffent all mit fliß zú dem cristenlichen menschen und sprechent in adve(n)tu sumi regis In der zü kunft des obroste(n) kúngs söllent gerainget werden die hertzen der mensche(n) Dz wir [68] wirdenclich wandlint in sinem engegen löffen won er kunt und sumt sich nitt<sup>54</sup> By<sup>55</sup> dem vierden Sunnentag in dem advent ist och bezaichnet die zü kunft als got ze gericht komen sol So kom(m)et er wider den menschen won alle ir súnd stelt er gegen dem menschen das sy im den menschen helfint schelten und urteilen und fúrt sy denn der bös gaist in die hell Die engel sind och wider den menschen won sy schaident die bösen von den gúten und all creatures helffent in verurteilen zu dem gericht komet got in ainem fúr Da zógt er sin gerechtikait Dárum(b) soltu in fürchten und solt an dem vierden Sunnentag anfahe(n) gott bitten flissenclich daß er sich úber Dich erbarm und daß er dich hie also richt das du dórt enkains gerichtes bedürffist [69] Die wuchen solt du och fasten Den ersten tag solt du fasten den englen die da ze gericht koment das sy dir gnädig sygint Den andern tag fast den patriarchen und propheten Den dritten

---

<sup>50</sup> Vgl. Is 40, 1: Consolamini consolamini popule meus dicit deus vester; sowie ebenso: 52, 1f.: (1) consurge consurge induere fortitudine tua Sion induere vestimentis gloriae tuae Hierusalem civitas sancti quia non adiciet ultra ut pertranseat per te incircumciscus et immundus (2) excutere de pulvere consurge sede Hierusalem solve vincula colli tui captiva filia Sion; sowie Dom 4 Adventus, Matins, Antiphon, Cantus ID 001896.

<sup>51</sup> Vgl. *De Sion veniet qui regnaturus est dominus Emmanuel magnum nomen ejus*. Fer. 5 Hebd. 4 Adventus, Lauds, Antiphon, Cantus ID 002121. Vgl. auch Is, 7, 14.

<sup>52</sup> Vgl. *Vigilate animo in proximo est dominus deus noster*. Dom. 4 Adventus, Matins, Invitatory antiphon, Cantus ID 001182.

<sup>53</sup> Vgl. *Nolite timere quinta enim die veniet ad vos dominus vester*. Fer. 4 Hebd. 4 Adventus, Lauds, Antiphon, Cantus ID 003898.

<sup>54</sup> Vgl. In adventu summi regis mudentur corda hominum ut digne ambulemus in occursum illius quia ecce veniet et non tardabit. Dom. 1 Adventus, First Vespers, Antiphon, Cantus ID 202371.

<sup>55</sup> Am linken Rand ist von späterer Hand *Andren* ergänzt.

tag den zwölff botten die das gericht mit gott haltent **Den** vierden tag. allen martren **Den** fünfften den bichter den sechsten únsere lieben frowen und allen mägten.. **Hie** by ist úns bezaichnet die zú kunft die úns kúnfftig ist

**Nun** vah an mit allen hailgen vättern und mit allen minnenden hertzen in der alten un(d) in der núwen **Ee** mit gantzer begird un(d) lad im und rüff im herzü won er ist ietz uff der vart zú úns ze komen **Und** bitt in das er zú dir in ker in din hertz und gemüt **Und** sprich disi gebett die sibene tag vor den wihennächten [70] all tag

#### **Die Erst antiffen**

**O** Ewige wyßhait die da bist us gangen von dem mund des aller obrosten **Und** alle ding bist du begriffen und us richten starklich süssentlich von ainem end untz zú dem andren dem andren<sup>56</sup> end kum(m) und ler úns den weg der wyßhait<sup>57</sup>

#### **die aunder antiffen**

**O Adonay** **Du** hertzog und laiter des huses ysrahel du da moysi in dem flam(m)en des fúrenen böschen bist erschinen und im uff dem berg synay die gebott hást gegeben kum(m) und erledg úns mit dinem us gestreckten arm<sup>58</sup>

#### **die dritt an(tifon)**

**O Du** wúrtzel yesse **Du** da stást zú ainem zaichen des volks uff dem die kúng enthaltent iren mund **Den** die haiden an bettend kum úns ze erlösen und sum dich yetz nit me<sup>59</sup>

#### **die vierd antiffen**

**O** du schlüssel davides und du [71] zepter des hus von ysrahel du da uff túst das nieman mag beschliessen und beschlússest das nieman mag uff getún kum(m) und für us die gefangnen von dem kárker die da sitzent in der finsternus und in dem schatten des todes<sup>60</sup>

#### **die fünfft Antiffen**

---

<sup>56</sup> Doppelung; Schreibfehler?

<sup>57</sup> Vgl. O sapientia quae ex ore altissimi prodisti attingens a fine usque ad finem fortiter suaviter disponensque omnia veni ad docendum nos viam prudentiae. Antiphonae Majores, First Vespers, Antiphon, Cantus ID 004081.

<sup>58</sup> Vgl. O adonai et dux domus Israel qui Moysi in igne flammae rubi apparuisti et ei in Sina legem dedisti veni ad redimendum nos in brachio extento. Antiphonae Majores, First Vespers, Antiphon, Cantus ID 003988.

<sup>59</sup> Vgl. O radix Jesse qui stas in signum populorum super quem continebunt reges os suum quem gentes deprecabuntur veni ad liberandum nos jam noli tardare. Antiphonae Majores, First Vespers, Antiphon, Cantus ID 004075.

<sup>60</sup> Vgl. O clavis David et sceptrum domus Israel qui aperis et nemo claudit claudis et nemo aperit veni et educ vinctum de domo carceris sedentem in tenebris et umbra mortis. Antiphonae Majores, First Vespers, Antiphon, Cantus ID 004010.

O Du uff gander schÿn Des ewige(n) liechtes und du sum der gerechtikait kum(m) und erlúcht die sitzenden in der vinsternus und in dem schatten des todes<sup>61</sup>

die sechst an(tifon)

O Du kúng der haiden und ir begirlicher und du ortstain der du ze samen fügen bist die zwai volk ze komen in ains. kum(m) und behalt den menschen den du uss laim hast geschaffen<sup>62</sup>

die sibent antiffen

O Emanuel Du únser kúng un(d) gesetzt trager ain baitung der haiden und iro behalter. Kum(m) uns ze behalten gott unnser herr<sup>63</sup>

die Achtent von Marien [72]

---

<sup>61</sup> Vgl. O oriens splendor lucis aeternae et sol justitiae veni et illumina sedentes in tenebris et umbra mortis. Antiphonae Majores, First Vespers, Antiphon, Cantus ID 004050.

<sup>62</sup> Vgl. O rex gentium et desideratus earum lapisque angularis qui facis utraque unum veni salva hominem quem de limo formasti. Antiphonae Majores, First Vespers, Antiphon, Cantus ID 004078.

<sup>63</sup> Vgl. O Emmanuel rex et legifer noster exspectatio gentium et salvator earum veni ad salvandum nos domine deus noster. Antiphonae Majores, First Vespers, Antiphon, Cantus ID 004025.

[Miniatur: ‚Mondsichelmadonna mit Buch‘]

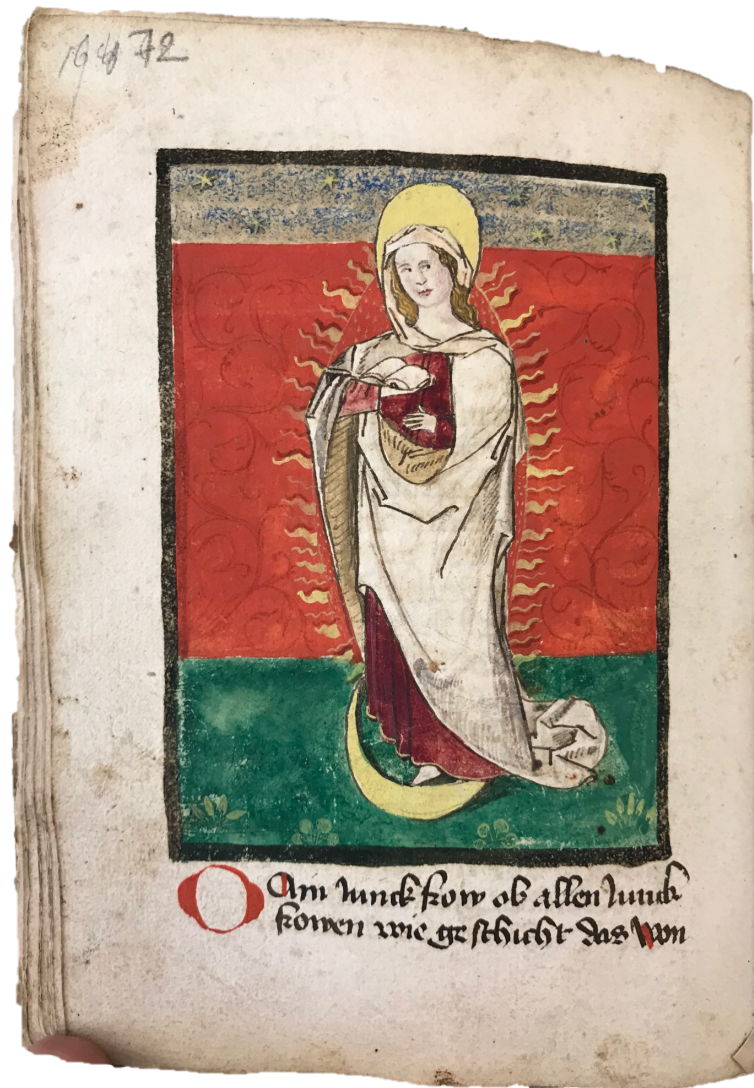



O Ain iunckfrow ob allen iunckfrowen wie geschicht das Won [73] kaine ist  
geschehen worden dir gelich weder vor noch nâch. ir tochtren von iherusalem  
nit verwundrent ûch an mir oder wes verwundrent ir ûch Es ist ain götliche  
haimlichait das ir an mir sehent<sup>64</sup>

die viiiij

O gabriel du bott der him(m)el der du bist in gegangen mit verschlossnen türen  
zü mir und hast mir verkündet das wort Du wirst empfaen und geben ainen  
sun der wirt gehaissen emanuel das spricht als vil als gott ist mitt unns<sup>65</sup>

die zehent antiffen

O Du fridlicher kûng und geboren vor aller der welt Gang uf durch das guldin  
tor und sùch haim die du erlöst hast und bring sy wider dahin dannen sy  
verstössen sint durch ir schuld<sup>66</sup>

Collect

O gott du bist der. Der uns iärlich bist erfrowen mit der baitung unser erlösung  
Verlih uns [74] gnadenclich das wir dinen ain gebornen sun den wir frölichen  
empfaent ze ainem erlöser. och sicherlich mit fröden werdint sehen zü ainem  
richter künfftig an dem Iungsten tag Der mit dir lept und richsnet in ainikait  
des hailgen gaistes iemer ewenlichen Amen

Am hailige(n) aube(n)t ze wihen(n)ächt

An dem hailg aubent ze wihennächt an dem anvang der metti so singt die halig  
cristenhait ain frölich. Hodie von der wyssagung als der wirdig iosue uns  
verkündet die gewären aller gewissesten bottschaft und rüffet frölich und  
spricht Hodie scietis Hütt söllent ir wissen dz der herr kunt Und frü so werdent  
ir sehen sin günliche<sup>67</sup> R(esponsorium) Werdent hütt gehailgot und sind bereit  
Won an dem morndrigen tag werden ir sehen die mayestat gottes [75] in ûch<sup>68</sup>

<sup>64</sup> Vgl. O virgo virginum quomodo fiet istud quia nec primam similem visa est nec habere sequentem filiae Jerusalem quid me admiramini divinum est mysterium hoc quod cernitis. Antiphonae Majores, First Vespers, Antiphon, Cantus ID 004091.

<sup>65</sup> Vgl. O Gabriel nuntius caelorum qui januis clausis ad me intrasti et verbum nuntiasti concipies et paries Emmanuel vocabitur. Antiphonae Majores, First Vespers, Antiphon, Cantus ID 004028.

<sup>66</sup> Vgl. O rex pacifice tu ante saecula nate per auream egredere portam redemptos tuos visita et eos illuc revoca unde ruerunt per culpam. Antiphonae Majores, First Vespers, Antiphon, Cantus ID 004080.

<sup>67</sup> Vgl. *Hodie scietis quia veniet dominus et mane videbitis gloriam ejus. Vigilia Nat. Domini*, Matins, Invitatory antiphon, Cantus ID 001084. Dieser Vers hat mehrere Verwendungen. Er ist sowohl ein Invitorium, eine Antiphon (Cantus ID 003119), ein Responsorium (Cantus ID 006865), Vers eines Responsoriums (Cantus ID 007594a), ein Versikel (Cantus ID 008089) als auch Introitus der Messe (Cantus ID g00535).

<sup>68</sup> Vgl. Sanctificamini hodie et estote parati quia die crastina videbitis maiestatem dei in vobis. Vigilia Nat. Domini, Matins, Responsoy, Cantus ID 007594.

Ir kind von ysrahel werdent gehailgot spricht der her(r) won an dem morndrigen tag gät ab der her(r) und er nimpt von úch allen siech tagen<sup>69</sup>  
**V(ersus)** Des morndrigen tags wirt getilget die boßhait der erd und es richsnet über úns der behalter der welt<sup>70</sup>

**zü der vesper an(tifon)**

Iudea und iherusalem ir söllent úch nit fürchten. gond morn us und der herr wirt mit úch sin alleluia<sup>71</sup> **Hodie scietis** **Hútt** wissent das der herr kunt und früg werdent ir sehen sin günliche<sup>72</sup> **an(tifon)** **Crastina die.** Des morndrigen tags so wirt getilget die boshait der erd und es richsnet über úns der behalter der welt<sup>73</sup> **an(tifon)** **Dominus veniet** Der her(r) kom(m)et löffent im engegen mit fröden un(d) sprechent **Du** bist ain grösser anvang **Du** bist ain grösser fürst und dins richs wirt nit endes [76] **Du** bist der starck gott und ain fürst des frides alleluia<sup>74</sup> **an(tifon)** **Crastina erit vobis salus.** Des mornrigen tags wirt úch hail beschehen sprichet der herr der geschlächten<sup>75</sup> **an(tifon)** **Orietur an(tifon)** Der behalter der welt wirt erschynen und er gät ab in den lib der iunckfrowen da erschynt er als die sun(n) und als der regen über daß gras und über den blümen<sup>76</sup>

**An** dem hailigen aubent ze wyhennächten zü der vesper so vacht an die hailig cristenhait mit fröden und mit iubel die antiffen **Rex**<sup>77</sup> **pacificus** **Die** spricht ze tútsch also **Der** fridsam kúng ist gegrosset des angesichtes begert alles ertrich<sup>78</sup> **an(tifon)** **magnificatus est et (cetera)** **G**egrösset ist der fridsam kúng

---

<sup>69</sup> Vgl. Sanctificamini filii Israel dicit dominus in die enim crastina descendet dominus et auferet a vobis omnem languorem. Vigilia Nat. Domini, Matins, Responsory, Cantus ID 007593.

<sup>70</sup> Vgl. Alleluia Crastina die delebitur iniquitas terrae et regnabit super nos Salvator mundi. Vigilia Nat. Domini, Alleluia, Cantus ID g00538.

<sup>71</sup> Vgl. Judaea et Jerusalem nolite timere cras egrediemini et dominus erit vobiscum alleluia. Vigilia Nat. Domini, Lauds, Antiphon, Cantus ID 003511.

<sup>72</sup> Vgl. *Hodie scietis quia veniet dominus et mane videbitis gloriam ejus.* Vigilia Nat. Domini, Lauds, Antiphon, Cantus ID 003119.

<sup>73</sup> Vgl. Crastina die delebitur iniquitas terrae et regnabit super nos salvator mundi. Vigilia Nat. Domini, Lauds, Antiphon, Cantus ID 001940.

<sup>74</sup> Vgl. Dominus veniet occurrere illi dicentes magnum principium et regni ejus non erit finis deus fortis dominator princeps pacis alleluia alleluia. Vigilia Nat. Domini, Lauds, Antiphon, Cantus ID 002423.

<sup>75</sup> Vgl. *Crastina erit vobis salus dicit dominus deus exercituum.* Vigilia Nat. Domini, Lauds, Antiphon, Cantus ID 001941.

<sup>76</sup> Vgl. Orietur sicut sol salvator mundi et descendet in uterum virginis sicut imber super gramen. Vigilia Nat. Domini, Lauds/First Vespers, Antiphon, Cantus ID 004195.

<sup>77</sup> Das ‚R‘ ist hier ein Großbuchstabe, aber nicht rubriziert.

<sup>78</sup> Vgl. *Rex pacificus magnificatus est cujus vultum desiderat universa terra.* Vigilia Nat. Domini, First Vespers, Antiphon, Cantus ID 004657.



über all kúng aller der welt<sup>79</sup> **an(tifon)** Completi sunt Die tag marien sind erfüllt  
das sy gebár iren erst gebornen sun<sup>80</sup> **an(tifon)** Scitote Ir [77] sond wissen das  
nah ist das rich gottes war sag ich úch er sumt sich nit me<sup>81</sup> **an(tifon)** levate  
capita vestra. Hebent uff úwri höpter won nement war úwer erlösung die  
nahet<sup>82</sup> **an(tifon)** zú magnificat Dum ortus fuerit So die sunn uff gät so werdent  
ir sehen den kúng der kúngen us gon von dem vatter als der brútgom von siner  
schläfkamer<sup>83</sup> ¶ Über disi wort spricht<sup>84</sup> der hailig apostel sannt paulus und  
spricht in de(n)

### Capitel

Die gütikait und die menschlichait únsers behalters ist úns erschýnen nit von  
den gúten werchen die wir getán habint besunder nach siner erbarmhertzikait  
hat er úns behalten Also vermanet úns sanctus paulus in disem capittel zú  
grösser dankberkait die wir sollent haben zú gott um(b) alle die güt tát so er  
[78] úns ie getett und án underlås all zit tút von sinen gnaden

<sup>79</sup> Vgl. *Magnificatus est rex pacificus super omnes reges universae terrae*. Vigilia Nat. Domini, First Vespers, Antiphon, Cantus ID 003670.

<sup>80</sup> Vgl. *Completi sunt dies Mariae ut pareret filium suum primogenitum*, Vigilia Nat. Domini, First Vespers, Antiphon, Cantus ID 001862.

<sup>81</sup> Vgl. *Scitote quia prope est regnum dei amen dico vobis quia non tardabit*, Vigilia Nat. Domini, First Vespers, Antiphon Cantus ID 004834.

<sup>82</sup> Vgl. *Levate capita vestra ecce appropinquabit redemptio vestra*. Vigilia Nat. Domini, First Vespers, Antiphon, Cantus ID 003608.

<sup>83</sup> Vgl. *Dum ortus fuerit sol de caelo videbitis regem regum procedentem a patre tamquam sponsus de thalamo suo*. Vigilia Nat. Domini, Second Vespers, Antiphon, Cantus ID 002462.

<sup>84</sup> Zu Beginn der nächsten Zeile wiederholt sich *spricht*. Schreibfehler.

[Miniatur: ‚Geburt Christi‘]

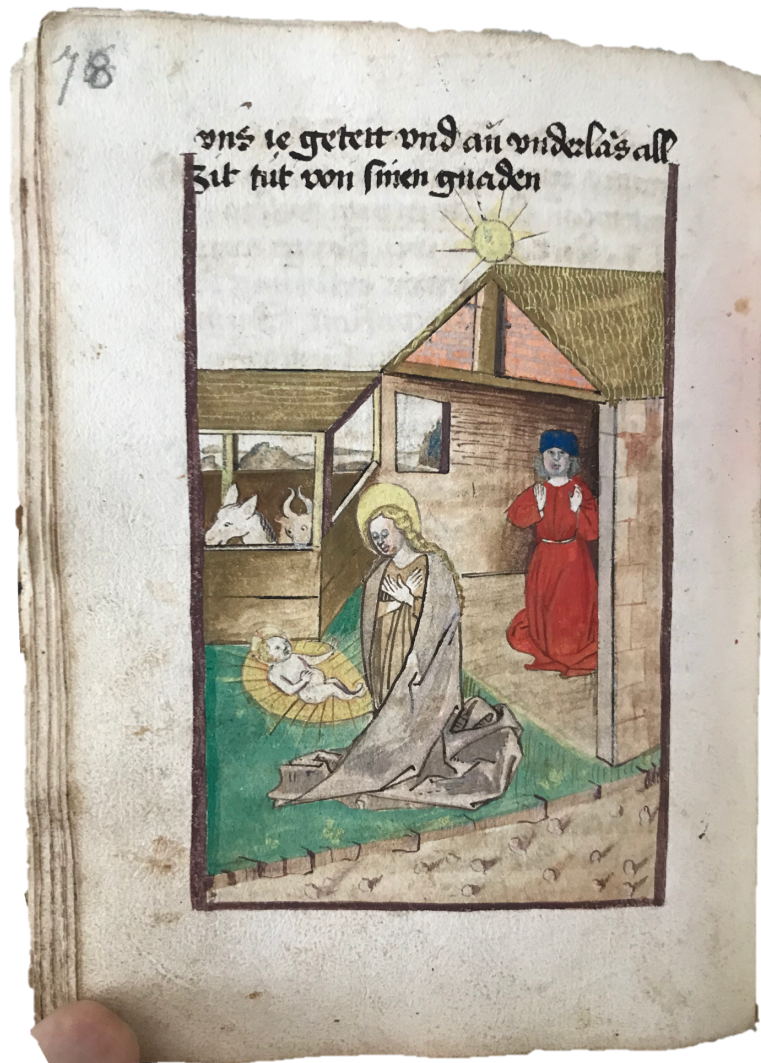

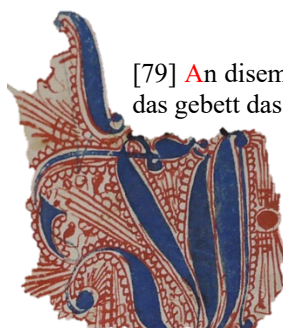

[79] An disem aubent der loblichen hochzit der wyhennächt so solt du betten das gebett das da vor stät in der dritten wuchen des adventes

der hailig tag zü wyhennächten et (cetera)

<sup>85</sup>n dem hohgelopten hohzitlichen tag zü wyhennächten in der hailigen nacht an dem anvan(n)g der Metti vacht an die hailig cristenhait und ladet alle menschen in der minn gottes das sy den gebornen herren ih̄m xp̄m mitt hertzen mit mund. und mit allen begirden lobint und erint Darum(b) singt man den(n) also **invitatorium** Cristus natus est Cristus ist úns geborn koment her Wir sond in anbette(n)<sup>86</sup> Hútt hat sich bewirdiget der himmelsch kúng von der [80] magt geboren ze werden umb dz er den verlornen menschen wider berúfti zú dem himelschen rich hútt frówt sich die schar der hailgen engel won allem menschliche(n) geschläch ist ewiges hail erschinen<sup>87</sup> **V(ersus)** Günüchi sy gott in der höhi und uff erd frid den menschen die ains gúten willen sind<sup>88</sup> Won allem menschlichen geschläch ist ewiges hail erschinen **R(esponsorium)** Hútt ist uns der gewär frid von dem himel herab gegangen. hútt sind durch die gantzen welt die himel honig flüssig worden<sup>89</sup> **an(tifon)** O magnu(m) misterium O Du größ hailikait und du wunderbares sacrament das die tierli gesehint den her(r)en Iacentem. ligend in der kripp Sälig ist die magt die da hat verdienet ze tragen den herren ih̄m xp̄m<sup>90</sup> **Respons(orium)** Sälig sind die ädren der gebere[81]rin gottes marien die da unberúret sind beliben die da haind verdienet ze tragen den herren xp̄m. Hútt hat sy geborn den behalter diser welt<sup>91</sup> **V(ersus)** Sälig ist sy das sy gelobt hat won es sind alle ding volbrächt. die zú ir gesprochen sind von dem herren<sup>92</sup> **R(esponsorium)** Sälig sind die

<sup>85</sup> Sechszellige Zierinitiale mit Kadellen vom oberen zum unteren Blattrand.

<sup>86</sup> Vgl. *Christus natus est nobis venite adoremus*, Nativitas Domini, Matins, Invitatory antiphon, Cantus ID 001055.

<sup>87</sup> Vgl. *Hodie nobis caelorum rex de virgine nasci dignatus est ut hominem perditum ad regna caelestia revocaret gaudet exercitus angelorum quia salus aeterna humano generi apparuit*. Nativitas Domini, Matins, Responsory, Cantus ID 006858.

<sup>88</sup> Vgl. *Gloria in excelsis deo et in terra pax hominibus bonae voluntatis*. Nativitas Domini, Matins, Responsory verse, Cantus ID 006858a.

<sup>89</sup> Vgl. *Hodie nobis de caelo pax vera descendit hodie per totum mundum melliflui facti sunt caeli*. Nativitas Domini, Matins, Responsory, Cantus ID 006859.

<sup>90</sup> Vgl. *O magnum mysterium et admirabile sacramentum ut animalia viderent dominum natum jacentem in praesepe beata virgo cujus viscera meruerunt portare dominum Christum*, Nativitas Domini, Matins, Responsory, Cantus ID 007274.

<sup>91</sup> Vgl. *Beata dei genetrix Maria cujus viscera intacta permanent hodie genuit salvatorem saeculi*. Nativitas Domini, Matins, Responsory, Cantus ID 006162.

<sup>92</sup> Vgl. *Beata quae credidit quoniam perfecta sunt omnia quae dicta sunt ei a domino*. Nativitas Domini, Matins, Responsory verse, Cantus ID 006162b.

audren der iunckfrowen marien die úns da haind brächt des ewigen vatters sun  
**Und** sällig sind die brúst die da gesögt haind cristum den herren **Won** hútt hāt  
er sich bewirdiget von der magt geborn ze werden<sup>93</sup> **V(ersus)** Der hailig tag hat  
úns gelúchtet koment ir haiden und bettent an den herren<sup>94</sup> da mit so maint man  
alle menschen **respo(nsorium)** **O** hailge unvermasgoti mägtlichait **Ich** wais nit  
was lops ich dir zü sol legen **Won** den die himel nit mugent begriffen **Den** hāst  
du in di[82]nem lib getragen<sup>95</sup> **V(ersus)** Gesegnet bist du ob allen frowen und  
gesegnet ist die frucht dins lips<sup>96</sup> **R(esponsorium)** **O** Maria ain frow der welt  
geboren us iunkfröwlichem stam(m)en **Uss** dinem lib ist nun xus us gangen als  
ain gespons von sinem brutbett **Der** lit in ainer krippen **Der** och regiert die  
sternen **Och** der höch fliegend adler **Sanctus** iohannes ewangelist spricht. als  
man och in der selben hailgen nacht singt und list **R(esponsorium)**. **Verbum**  
**caro factum est Respons(orium)**

**Das** wort ist flaisch worden und hāt in úns gewonet **Und** wir haind gesehen sin  
eer **Ain** eer als des erst gebornen von dem vatter voll gnaden und warhait<sup>97</sup>  
**V(ersus)** Alle ding sind durch inn gemachet und än in ist nütz gemachet<sup>98</sup>  
**prophecÿa**

**Och** der wirdig prophet ysaÿas hāt in siner prophecÿ die re[83]chten wārhait  
funden und das trostlich frölich wort us gekündet **Do** er sprach **Ain** clarer sun  
ist úns hútt geborn und er wirt gehaissen der starck gott alleluia des lobent alle  
gott **Och** spricht er in dem anvang der loblichen fron mess in dem **Introitus**  
**Puer**<sup>99</sup>

**Ain** kind ist úns geborn un(d) ain sun ist úns gegeben des fürsten tūm ist im  
geleit uf sin achsel und er wirt gehaissen oder genempt der engel von grössen

<sup>93</sup> Vgl. Beata viscera Mariae virginis quae portaverunt aeterni patris filium et beata ubera quae lactaverunt Christum dominum quia hodie pro salute mundi de virgine nasci dignatus est. Nativitas Domini, Matins, Responsory, Cantus ID 006171.

<sup>94</sup> Vgl. *Dies sanctificatus illuxit nobis venite gentes et adorete dominum*. Nativitas Domini, Matins, Responsory verse, Cantus ID 006171b.

<sup>95</sup> Sancta et immaculata virginitas quibus te laudibus referam nescio quia quem caeli capere non poterant tuo gremio contulisti. Nativitas Domini, Matins, Responsory, Cantus ID 007569.

<sup>96</sup> Vgl. *Benedicta tu in mulieribus et benedictus fructus ventris tui*. Nativitas Domini, Matins, Responsory verse, Cantus ID 007569a.

<sup>97</sup> Vgl. Verbum caro factum est et habitavit in nobis cujus gloriam vidimus quasi unigeniti a patre plenum gratia et veritate. Nativitas Domini, Matins, Responsory, Cantus ID 007840.

<sup>98</sup> Vgl. *Omnia per ipsum facta sunt et sine ipso factum est nihil*. Nativitas Domini, Matins, Responsory verse, Cantus ID 007840c.

<sup>99</sup> Vgl. ‚Introitus: Puer natus est nobis‘, <https://gregorien.info/de>, abgerufen am 13.08.2018.

rät<sup>100</sup> Darum(b) singent dem herren ain núwes gesang won er hât getân größi wunder<sup>101</sup>¶

Nun sprich an disem hailge(n) tag Und och diss gantz acht tag dis vermanungen und diss gebett

Bett<sup>102</sup>

O Du hochgelopter hort und schatz des götlichen richtums wie hast du dich ewiger gott in so tieffi armüt gesenket [84] das du nit allain richtum diser welt hast verschmähet ze haben noch hus noch hof ze besitzen wie du doch all creatures geschaffen hattest und och din aigen wärent Besunder och von allen menschen us getruckt und getrengt under ainen ellenden schopff der fíchlichen tiere in frömder herberg in krancker wät. Gesüchet und funden woltest werden Eya wie hast du dich gegen uns so milteclich nider gelassen und dich úns in ains iungen clainen gütigen kindlis wis gegeben in dem aller zorn und räch gegen úns ist vergessen O Du inwonender haimscher sun des vatterlichen hertzen wie erscheinest du úns in so grössem ellend an ainer verworffnen und in ainer verschmächten statt in tieffer armüt diner nackenden bloßhait O in strengi dins herr(r)ten geligers in der engen kripp uff dem ruhen höw [85] in scharpffer winterzit Do der grim(m) frost und kelti alle dine zarten gelidli so gar pinlich durch tranng das die befintlichen schmerzen dins zarten kintlichen lips mit fröstigem zittren wért liden Darum(b) din erster anblick in diss welt an diner gebürt durch trang alle din menschlichen krefft mit befintlichem schmerzen und liden

Eya du úber gúltes turtel túbli Ach wie hast du din wainliche stim(m) lassen hören mit lutem kintlichem geschraÿ und mit mengem bitterlichen trähnen die dine kintliche lutri ögli so betrüptenclich us gussent und uff dinen rosfarwen wenglinen von scharpffer kelti gefrurent O ir alle betrüpten rüffenden ilend her sehent und schowend unsern behalter. geboren in der menschait des ir so lang zit haind begert Nement war [86] der ist nun kom(m)en des fröwent úch und sind hüglich Och von der engel verkündung und iubilieren der fröd die hirtin inbrünstenclich enzündet würdent und da hin iltent da sy dich ewiges wort in núwer gebürt fundent und an bettetent des sag ich lob und e(e)r diner gúnliche O liechter glantz der ewigen clarhait gewaltiger herr yetz geboren ain kindli klein von mächtig din selbs hest din iungen zarten müter alle dine gelidli in windlen und binden. heben und legen wie sy welt nach ir müterlichen begírd

<sup>100</sup> Vgl. Puer natus est nobis et filius datus est nobis cujus imperium super humerum ejus et vocabitur nomen ejus magni consilii angelus. Nativitas Domini, Mass, Introit, Cantus ID g00553.

<sup>101</sup> Vgl. *Cantate domino canticum novum quoniam mirabilia fecit*. Nativitas Domini, Mass, Introit verse, Cantus ID g00553a.1.

<sup>102</sup> Die Rubrik steht hier am rechten Zeilenrand zwischen *hort* und *und*.

so nam(m) sy dich zartes gemin(n)tes kindli in ir mägtlichen schöß und sah  
dich claren lutren spiegel an mit spylander fröd Eya sy um(b) vieng dich dick  
und vil Ach wie mit hertzlich(er) begird truckt sy dich an ir mägtliches hertz  
als ir ainges hertzeli[87]ches liebli und kust dich an din honig süßes mündli  
An din rosfarwen wengli und an din glintzenden ögli und din durch lúchtendes  
angesicht mit begirlichem lust da von ir angesicht und ir lefftzen min(n) fürin  
un(d) durch glestent ward von der berürd un(d) handlung diner vergóttenden  
person  
Von Marien



[Miniatur: ‚Maria im Wochenbett‘]

87  
des liebli vnd kist dich an din ho-  
mig süßes mündli An din ros far-  
wen wengli vnd an din glühen-  
den ogli vnd din durch lüchten des  
angesicht mit begierlichem lust da  
von ir angesicht vnd ir leffen min-  
firm vñ durch ghestent ward von  
der herzd vñ hand lüng dinez ver-  
gottenden person **Von Marien**

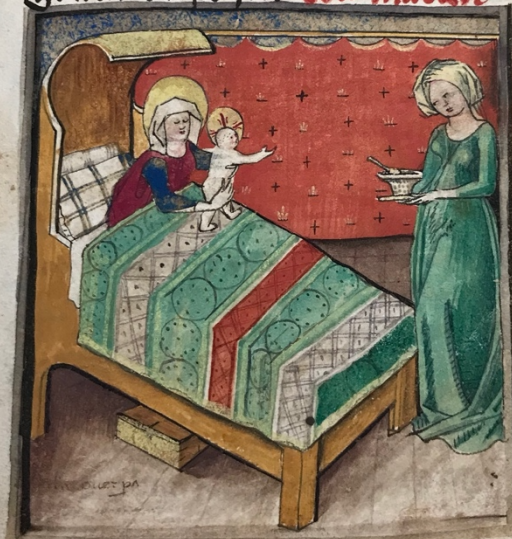

[88] O Du hohe himelsche edli kindbetterin maria Ich ermanen dich des unbegriffenlichen lustes und fröden so du hetttest in dem anblick dins núw gebornen zarten kindlis das du so dick wärt anblicken und dich so tieff für in naigen und din schönes antlit in sin vergöttetes angesicht wärt legen und das vil süssencklichen küssen un(d) an din mägtliches hertz trucken.

Eya wie mit so lieplicher wis so müterlich du den gewären gottes sun dinem zarten iungen kindli wärt bietten sini mägtliche brústli die so süssencklichen was sugent, mit kintlicher zarthait un(d) gebärden da von du edli magt un(d) hohi edli gebererin unmässigi fröd empfiengt Ach müter aller gnäden. ich naig mich demütencklich für din hohen erwirdikait Und begeren das du mich súndigen [89] menschen nit verschmahist dich edlen mägtlichen kaiserlichen müter des schönen Kindes mit hertzlicher begird ze grüssen O lieplichi zarti mägtliche müter gund mir und erlob mir ain schön iungs kindelin das zart liebli in diner müterlichen schös an ze sehen un(d) mit im ze kosen nach alles mins hertzen begird

Ain húpscher grutz von dem kindli ihesus



[Miniatur: „Fünf Wunden, mit Kreuz und Christuskind“]

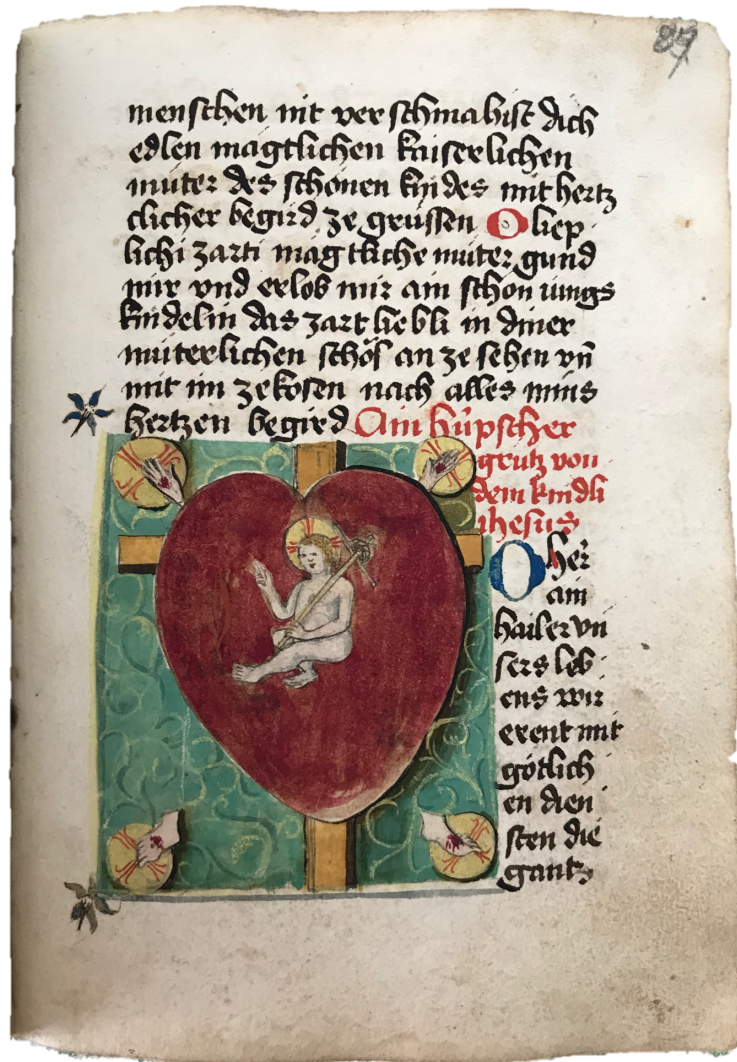

O Her(r) ain hailer unsers lebens wir erent mit götlichen diensten die gantz[90]hait und die luterkait diner kinthait in des uff gang únsere naturen wider brächt werdent Gegrüsset sygist du gesegnetes kindli ihesus. Eya wie bist du uss unsprechenlicher minn von der schöß des vatters ab gangen in den iunckfröwlichen lib marien ze únsere ewigen erlösung Gegrüsset sygist du erwirdiges liepliches kindli ihesus. als du durch den lib der unbefleckten iunckfrowen und gebererinen in diese welt us gangen bist. als ain gemahel von sinem schläffkemerlin Gegrüsset sygist du ain geborner sun des himelschen vatters selchich úns geborn an liplich empfangkhus. Gegrüsset sygist du erliches kind des gebürt it götlichen wundern und zaichen erlúchtet ward Gegrüsset sigist du aller hailigostes kind des uff gang der himelsch hof hat kund geton diser welt. [91] Gegrüsset sigist du adenliches zartes kindli ihesus in des hohen gebürt und uff gang ain núwer stern erschinen ist und die ersten frucht der haidnen hailsamlich entlam(m)et hat mit dem glantz sines liechtes Gegrüsset sigist du liepliches begirliches kindli ihesus Du bist süsser denn alle honig fliessende süssikait Gegrüsset sigist du usserweltes schönes kindli ih(esus) Als du bist genaigt in die krippen gewunden in die túchli. gesúcht von den hirtten. geert von den kúngen. mit bezaichenlichem globen und gaben Gegrüsset sigist du ain sun der gerechtikait durch dich ist das liecht uff gangen den gerechten hertzen Gegrüsset sigist du ain spis der engel mit des süssekait alle userwelten in ewig(er) sálikait gespist werdent Gegrüsset sygist du ain verborgen himel[92]brot von des aller süssesten wol geschmackten genuchtsami wider brächt werdent die gemüt die in dich gelobent Gegrútzet sigist du edli wirdigi frucht des lebens won durch dich haind die userwelten die süssikait der gnaden die uss dir entspringent in ewiger méssung Gegrútzet sigist du aller schönster iungling du aller süssester ihesus. geziert mit der vollung richait aller tugent sálikait Gegrútzet sigist du usserwelter gottes sun únsere hail und únsere ewige erlösung Gegrútzet sigist du ain offni tür und ain guldin tor des ewigen lebens Gegrútzet sigist du aller hóchsti geziert der englen Gegrútzet sigist du ain über treffenlichei fröd der patriarchen Gegrútzet sigist du ain fundament der propheten und der apostel Gegrútzet sigist du [93] ain über gelicher zaichen trager der martrer Gegrútzet sigist du ain er der hailgen bichter Gegrútzet sigist du ain kron der hailigen iunckfrowen Gegrútzet sigist du ain gemahel der hailgen cristenhait Gegrútzet sigist du ewige rúw frödriche niessung aller userwelten hailgen und alles himelschen hers von ewen zü ewen in dem ewigen leben Gegrútzet sigist du aller wisester iúngling mit des töff wir gewaschen sint und behalten werdent und des guldini ler úns geschenckt hât den süssen geschmack aller genuchtsami dârum(b) úns ist erzögt und uff geton die tür des ewigen lebens da hin so für mich nach disem ellenden leben das ich dich da ewenliche(n) werd schowen und messen in den ewigen fröden Durch

die grundlosen min(n) die dich grössen gott hāt machen [94] erscheinen ain  
claines unvermugendes kindelin **A**men

[Miniatur: ‚Beschneidung des Herrn‘]

erscheinen am claires vuerungen  
des Kindes **O**men

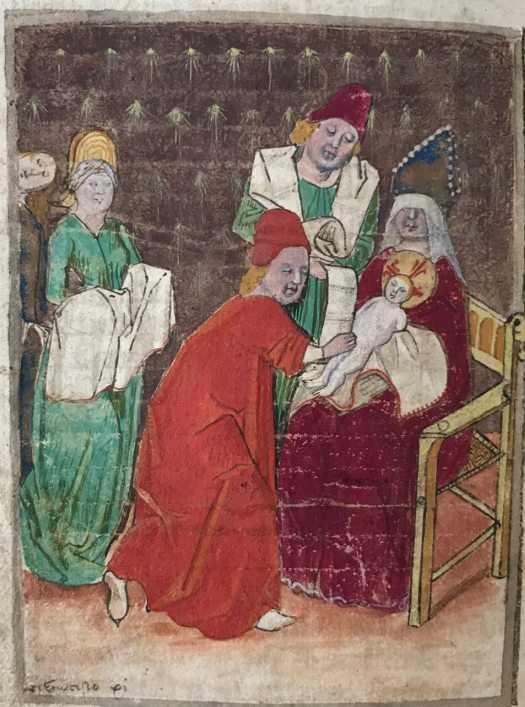

[95]

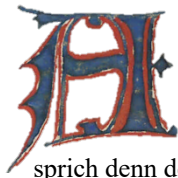

<sup>103</sup>**N** dem ingenden iär so begät die hailig cristenhait das wirdig hohzit als xus ihesus únsér ewiger behalter beschnitten wart und sin túres blút zü dem ersten mal verzert und vergöß von minnen dñrch únsérn willén und sin nam genempt ward. ihesus das ist als vil gesprochen als ain behalter **D**arumb so sprich denn des selben tags dis gebet

**O** du us blügendes wort des himelschen vatters geborn in menschlich natur in dis ellent iomertal **O**we min ungemessni trúw und liebi wie hást du dich hútt aber erzógt in besunder bezaichnung das du dich lutrer mágtlicher iúngling woltest lásen beschniden **O** du liepliches zartes kindli was mocht din iunges hertzli gedencken **D**o sich din wirdi[96]gi mütter maria und din schinender vatter ioseph frü sich uff mündretent und sich darzü beraítent und die erwarten und die darzü gehortent sácht kómen **E**ya wie mocht din iunges gemintes hertzli so mengen schrecken nemen **W**on dir alle ding bekant und wissent wárent **U**nd nüt verborgen als andren kinden **D**arum(b) alles liden und pin in dir dester pinlicher was **A**ber willénlich hest du dich uss der krippen nemen und entwinden und din schónes liepliches libli enplótzen und uff schónen wyssen tüchern wárent sy dich in die schöß legen und din hendli und füßli heftenclichen heben und liest dir din haimliches zartes gelidli süchen und berüren **O** und also knúwend vor dir in grösser erwirdigkait wárent sy dich beschniden. mit ainem staininen messer das darzü gemetzt [97] gehowen und gescherpt und beraít was. hut und flaisch an dem gelid úbriges ab ze trucken nah ordnung der gesetzt **E**ya hier in(n) dir gemintes kindli der honig süss erwirdig nam(m) ihesus dir uff gelait offenbarlich geben wart der von got vatter ewenlichen an gesehen und geordnet was und also vor diner geburt von dem engel diner lieben mütter verkúndet wart **O** usserwelter hort wie hast du dich hútt so rilich entgossen in dem us fliessen des blútes von dinem verwunten zarten gelidli **D**as erwirdenlich empfangen und behalten ward von marien diner kúngklichen mütter **O** **D**u süsser zipper trub du süsser ihesus **W**ie bist du hútt ab geschnitten und so scharpffenclich durch die scherppfi des messers ab getruckt das du edler roter zippen(er) win vóllenclich bist us fließen **O** **D**u [98] gemintes liepliches kindli ihesus was ungemessnen und verwunddeten sers du hattest an dinem zarten gelidli **A**ch da von alle dine kintliche natur so ser bewegt ward und durch trungen mit pinlichem besniden das din schónes lútsálges antlit sich da von entstalt das dine rosfarwen wengli blaichfarw und din honig süsses mündli blaw farw würdent und dine schóne clare ogen unzalich haiss trahen wainetent mit lutem kintlichem geschrai und wainlicher

<sup>103</sup> Fünfzeilige Initiale.

stim(m) mit úbel gehabender kintlicher gebärd das enkain zarten noch trütlen noch lieplichen wis und gebärd diner wirdigen müter nit enthalff **W**ie vil und dick si dich an ir mägtliches hertz truckt und trostlichi süssi wort mit dir redt. lieplichen dich um(b) vieng zartenclich dich küssent was und iri zarti brüstli die da voll wärent von dem himel **A**ls man in diser [99] nacht singt in der metti dinem honig süssen mündli bot ze sugen mit müterlicher zarthait da mit kund sy dich nit gestillen noch din bitterliches wainen geschwaigen da von irem müterlichen hertzen vil we beschach und in grössem mitliden und betrübt was und also wainent und ungetröst dich wider in din krippen was legen

**O** Du süsser trost únsere armen verworffnen sündere **I**ch ellendi sünderin il hin zu dir edlen costparen hort mit demütiger nigung **A**ch erzög mir hütt din wirdigen zarten lutren kinthait dich an ze betten in dem innigosten mins hertzen in gewärem mitliden hütt den tag dins schmerzlichen lidens in der scharpfen beschnidung **A**ch und begeren mir und allen menschen milteclich ze vergeben alle die sündlichen gedenck wort un(d) werch [100] die wir mit hertzen und gemüt mit flaischlichem gelust mit unlutren begirden in zerstörlichait des lips ie begangen und volbracht haind in grössem schwären enteren und übertreten und übersehen aller diner gebotten und gesetzten **A**ch du blügendes rosenzwy du schönes mayenris. erblick úns in diner zarten kinthait. ernúwer úns in dinem bittren schmerzen **W**äsch und tóff úns in dinem costbaren blüt vergiessen **A**lso das wir gelútret und gerainget werdint von allen únsren sünden und geziert werdint mit wärer minn und schinender luterkait das wir von dir ewenclich niem(er) geschaiden werdint **A**men

**Der zwölfft tag**

**A**n dem zwölfften tag so begät die hailig cristenhait wie der stern die hail[101]



[Miniatur: ‚Anbetung der Heiligen Drei Könige‘]

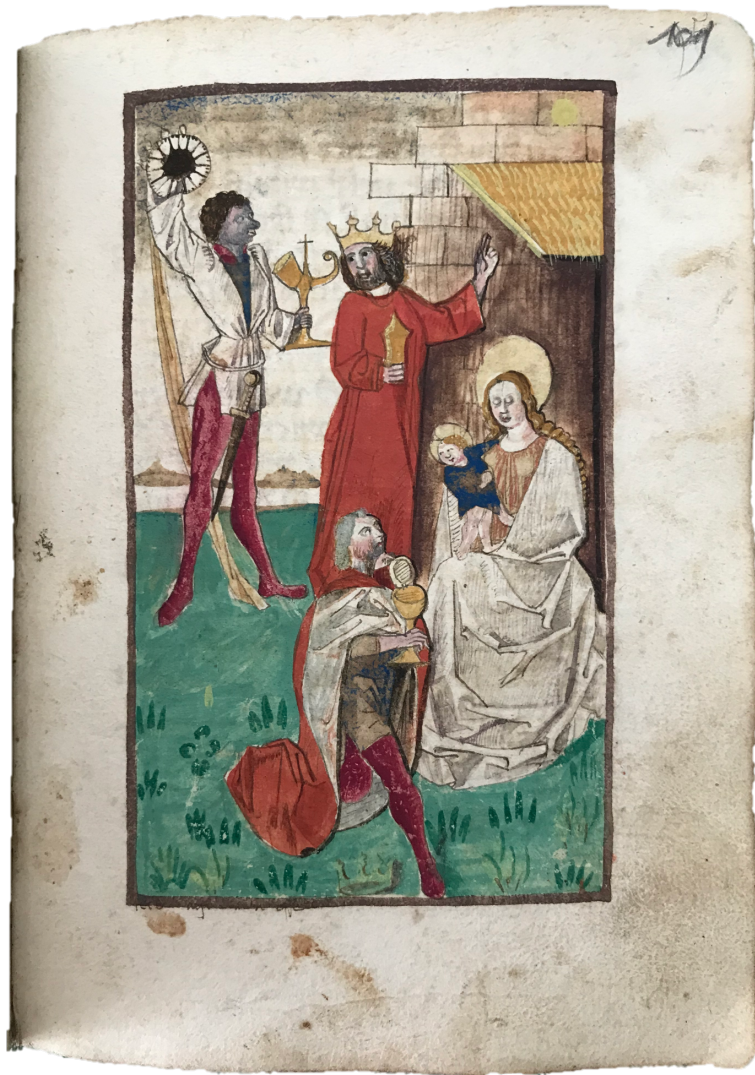



[102] gen dry kúng wist hin gen bethleem zü dem kindli her ihesus da sy im opffrotent gold wiroch und mirren Darumb so sprich diss gebett und vermanung an disem hoh gelopten tag und ouch die selben gantzen acht tag

#### Die dry kúng

O Du hoher ursprung aller lieblicher und wesenlicher dingen wie unergrüntlich sind din weg und die us flúss diner gnaden so rilich O du fürin minn des götlichen gaistes Wie hast du so inhitzenlich enzündt die hohen fürsten Die wirdigen hailgen dry kúng mit diner min(n) strál die so gar durch gangen hat ir hertz sel und gemút das sy dich gewarlich glóptent und in dem selben globen und hitziger min(n) dir nah zugent so us ferren frömden landen und in diser ilender hitziger begird sy do koment in das ge[103]lopt lannd und von diner besunder würkung do anfiel ain gröser nebel in dem sy zü ainandren zugent und von dinem götliche(n) gaist der sy erlúchtet hatte würdent sy ainander erkennen und uss was mainung ieklicher dar komen was die doch in inen allen gelich was Darum(b) sy enander frúntlichen grúztent und ainmüteclich in die statt iherusale(m) koment geritten mit unzalichem grössem volck Won der stern wz inen underzogen Do rúfftent sy all als usser ainem mund un(d) hertzen offenbarlich mit luten stim(m)en wo ist der geboren ist ain kúng der iuden und wärent sich erfaren under den gelerten wo er geborn wär und erfúnde(n)t sich in den sprúchen der propheten Das du xvs ihesus únsere lieber herr und behalter soltest gebore(n) [104] werden zü bethleem da hin do die edlen kúng gewist würdent O die do mit grössem schall uff bráchent in iherusalem und also sy den stern en sahent der inen vor underzogen was den sahent sy do aber in grösser clárhait Ach do würdent sy mit grösser fröde erfrowt und zugent hin dem stern nach der sich vil adenlich erschwang mit fürinen gnaiste(n) in den lüfften und sich herab ließ und still gestünd ob der statt da du ewiges wort in(n) geboren wärt in menschlicher natur Do sässent die edlen kúng ab und giengent ze füß Durch die gassen hin in das hus das was ain armer stal Do fundent sy dich hohen kúng und schöpffer himels und der erd by diner wirdigen mütter und magt marien O der unmässigen fröden die ir sel durch [105] gieng do sy dich schönnes liepliches kindli erst anblicktent Uff der schöß diner lieben mütter sitzent nackent entwunden vutz an die ärmli do wärent sy dich tieff naigen demüteclich für dich uff die erd die sy kustent dir zü wirdikait Ach wie sy do mit lutrer bekantnus mit festem globen dich wärent anbetten als iren ainigen gott und ainen gewaltigen kúng und herren aller der welt des die welt lange zit gebaitet hatt das sy von dir erlöst und in ains brächt solt werden Uss disem globen sy dich so vermenschlichen hattent gesúcht und so kostbarlichen sich berait mit rilichen schätze(n) und so adenlichen geziert mit kúniglicher wát Und guldinen kronen in der schönen kúniglichen wát und zierlichait Sich die kúniglichen herren Aber uff ire [106] knú tieff nider bogtent in das bächt und

pulver der erd in grösser erwidigkait für dich himelschen kúnig **A**ch und tättent uff ir schätz und opffretent dir iungen kúnig gold wirroch und mirren **D**es sy doch wenig müt hattent dir soliches ze geben. besunder größ schätz und rilich gaben dir ze opffren **E**ya do würdent sy von úbervölly götlicher gnad un(d) dins gaistes süssikait so gar úber flossen und truncken und in dich versenckt das sy um(b) sich selb nit vil wyßtent **D**arum(b) sy un gefärlich in die schätz griffent und das klainest geachtet dir gäbetent als es von dir ewe(n)lich was fürsehen und du es also gehept woltest haben **D**es sig dir lob und er gesait dis dinem adel[107]lichen würcken in disen hailgen drin kúngen und in allen dinen userwelten

#### **Das gebett**

**A**ch darum(b) allmächtiger got so rúff ich zú diner milten erbarmhertzikait und bitt dich das du lássist die gnaist diner minnbrunst herab fallen in min hertes kaltes hertz das es erhitz got werd in gewaurer götlicher min(n) und liebi zú dir minem got und herren. **R**icht mich uff den weg der warhait das ich mit ilender begírd mit den hailgen drin kúngen sig ziehen und faren durch alle wandelbarkait und manigfaltikait diser zit und alles liden und betrúpt gedultenlich sig emphauhen **A**lles lieb tröst und er in forchtsamer demütikait dir sig wider uff tragen und das ich dir mit andächt sig opffren. gold. wäre götliche minn **W**irróch [108] andächtiges gebett **M**irren bittri rúw um(b) all min súnd und alle güte werch und darin(n) ze vollharren untz an minen tod **A**men

#### **Diss ist das gebett**

**O** ir hailgen dry kúnig und ir kúngelichen fürsten **I**ch rúff zu úwer fürstlichen gnád mich armen súnderinen ze erhören des ich an úch beger **D**z ir mir erwerbint und allen menschen erlúchtung in únsrer blinthait in der wir bekennint únsrer súntlich leben und den grund der boßhait uff dem wir alle súnd volbringe(n)t **D**as wir die in wärer rúw und lutrer bicht und bús hie in dem zit der gnaden ablegint und mit siner götlichen gnad versünt werdint und von im uff den rechten weg gewist werdint **D**as wir in disem sorgelichen zit nit verderbint und von únsren figenden úber[109]wunden werdint **B**esunder koment úns gnädenlich ze hilff in allen angsten in allen nöten an sel und an lib won úch doch got enkainer bett verzicht **A**ch ir hohen edlen himel fürsten durch das wunderbarlich würcken so got durch sin güti mit úch gewürckt hat und sich selb úch gezögt **S**o sind úns erwerben craft stercki allen untugenden und unsren figenden ze angesigen und werch der tugenden ze volbringen un(d) das wir in dem liecht des globen och in fester züversicht un(d) rechter waurer minn an unsren lesten funden werdint **D**as wir das vätterlich erb des himelschen landes mit úch besitzint.

**A**men [110]

[Miniatur: ‚Darbringung im Tempel‘]

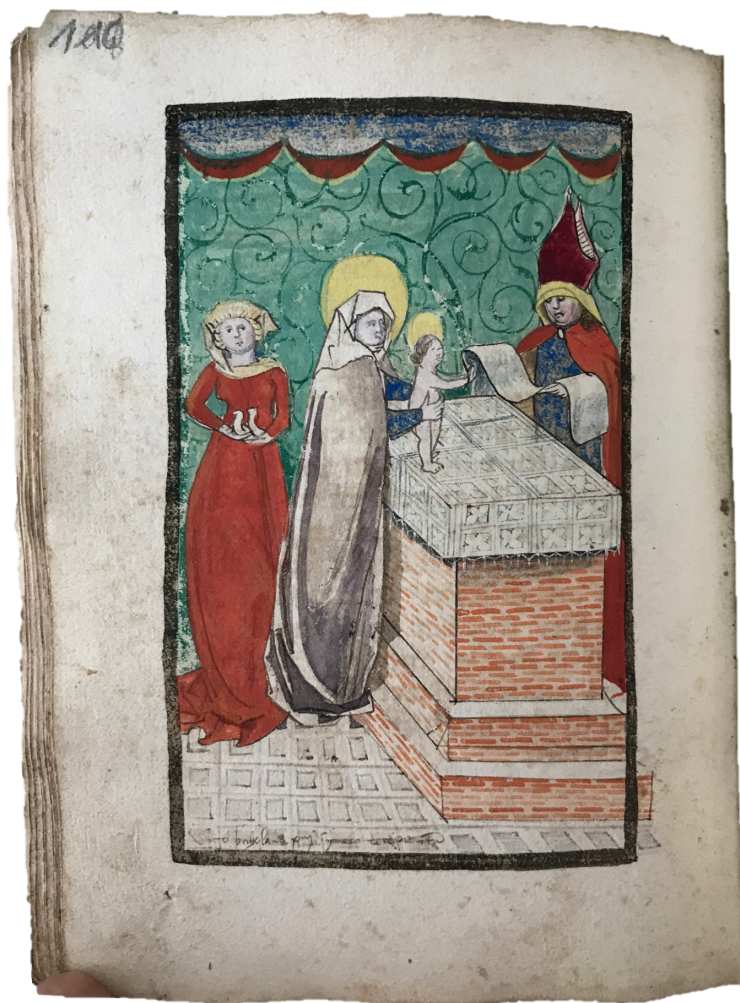

[111] An dem wirdigen tag zü der liechtmiß so begaut die hailig cristenhait wie die wirdig müter und magt ir liebs kind ihesus in den tempel opffret Darum(b) sprich den(n) dise vermanung

#### Vermanung

O du userwelter schatz un(d) ain geborner sun des himelsche(n) vatters und zartes liepliches kindli der kúnglichen gebererinen marien der magt erst geborner sun in der menschait Eya ich ermanen dich wie du besunder hútt uff disem loblichem tag dich aber in din schin únsere sundigen lips woltest erschinen und erzögen und Din edli luterkait verbergen Ach wie das der edel durchlucht prophet ysaías gewyssaget hat un(d) uskündt das din userwelter müter mägtlich dich liechtrichen schönen emanuel empfahe und geben [112] solt und och mägtlich beliben als och besunder ioseph din pfleger dis clarlich bekan(n)t und befand ob allen menschen und doch schinend din vatter in der erd gehaissen was und och in dem Sacrament der hailgen E maria diner wirdigen müter in gemahelschafft vertruwet. Ach und du kúngliches kindli sin schin(n)ender natúrlicher sun woltest haissen und in der e von im geborn angesehen sin Darumb er ouch mit vätterlicher trúw zu dir verbunden was dich hohen schatz ze behüten und ze besorgen in aller lieplicher nottürffikait als ain getrúwer vatter sin ainges liebes kind ze erziehen nah aller lieplichait in grösser erwirdikait alles bezaichenlich der gesetzt gnüg ze tünt Won wie du über natúrlich durch den hailgen gaist an mannes somen empfangen wirt [113] und mägtlich geborn Das solt un(d) müst beschehen in dem schon der E in erwirdikait des sacramentes ze für komen an dir und diner wirdigen müter Eya darum(b) du dich hútt woltest lassen antwürten in den tempel als den erst gebornen sun diner wirdigen müter schinend in sünden empfangen Ach was grösser min un(d) demütikait du hierin(n) úns hast bewist O wunnlicher glantz und lútsälger spiegel an mäsén in dem sich die ogen der himelschen gaisten erwittrent und das du zü den vermäßgoten sündern dich woltest gelichen der gesetzt der raingung

#### Von Marien

O Du hohi edli kaiserliche mägtliche kindbetterin Ich vermanen dich in miner betrachtung und sích als gegenwirt(n)clich wie du dich des tags hútt frü an dem morgen uff mundretest in der húli da du die [114] viertzig tag in(n) wárt beliben und din schönes liepliches kindli ihesus also schläffent usser sinem wiegli also in gewindelt wárt uf heben an din mägtlichen arm und mit ioseph dinem getrúwen gemahel dich wárt richten von bethleem gen iherusalem O des lieplichen tragens du iungs zartes mägtliches müterli noch nit gar voll wachsen dinen schonen wol gefüreten michel und faist wárt tragen und doch diner iungen zarthait der weg mit dem wol gesögten kindli dir ze ferr was Darum(b) ioseph din gemahel by wilent es och was tragen und ir baide mit grösser lust

und begird von gegen wirtikait deß kúngelichen húpschen kindlis frólichen giengent

**In dem tempel do be ward bracht opffer**

**O** Du uff gender ros von ihericho du wis schinender [115] **G**ilg aller luterkait von **D**em ewigen vatter uns gelopt ze senden dis din hohen zúkunft der alt durch lúcht wissag **S**ymeon wol bekan(n)t in sinem gaist und nach dir so gar bewirig was **D**as er mit mit súnfftzen mit trähnen än underlās uff rúft in senender qual tag und nacht niemer gerúwet bis er ain trostliche antwúrt von dinem götliche(n) gaist empfieng **D**as er dich únsern ewigen behalter in der menschait geborn vor sinem sterben sole sehen **A**ch da von er so behúgt wart das sin lib und kreft gesterckt würdent und wunderbarlich in siner alten kranckhait in grössem vermugen begirigem warten der gelúpt Die im verhaissen was den tag er kum erbaitet ze sehen in dem sin begird erfüllt ward **O** du durch lúchter wyser vatter **S**imeon mach dich her[116]us die schön lieplich kindbetterin maria kunt mit ir süssen frucht. gang us won dir nachtet din trost **A**ch wie mit so tieffer demütikait **E**r für dich nider fiel uff die erd do er din sichtbar ward und kust die erd vor dir und bettet dich hohen gott an in wárem lebendem globen ze sin da gegenwirtig in der menschait **E**r stúnd uff und sah dich lütsälgen spiegel und der anblick durch gieng alle sin kreft in unmässiger fród und mit grösser erwidigkait wz er dine zarte edle hendli un(d) füßli küssen **A**ch und du liepliches schönes kindli ihesus wie strebest du von diner müter arm in kintlicher wis gegen im **E**ya wie begirlich er dich ewiges wort do an sin arm empfieng und dich an sin hertz truckt mit mengem tieffen súnfftzen und haissen trähnen die er von hetziger begird und von unmässiger [117] fród wainet **O** **S**imeon **D**u hailiger vatter was eren was wirdikait dir ist fürsehen **W**on des all vätter kúng un(d) patriarchen haind begert und so lang begert gebaitet und all wissagen so clarlich us kúndet und prophetiert und doch inen allen ist versait den tag ze sehen in dem ir hail solt uff gon **A**ch und du das hast gelept ob in allen das du in an dinem armen hast wie du wilt **O** ihesus du lieplicher hort wie mit frólichen gebärden der lieb simeon dich in den tempel her und dar mit mengen süssen sprúchen und begirlich rúft er zú dinem ewigen vatter **A**ch her(r) nun läß mich dinen knecht in frid gon **W**on mine ogen haind gesehen din hail<sup>104</sup> **N**ah disem frólichen lob und danckberkait bot er dich gemintes kindli von im diner wirdigen müter marien an ir mägtlichen arm und von insprechen dins götlichen gaistes [118] prophetiert er von dir sprechent **D**iser ist gelait ze ainem fal und ze ainer urstendi vil volks in ysrahel und das das schwert des schmerzzen von dines todes not durch din wirdigen müter sölti gån **O** maria. kúngeliche müter **A**ch wie was von disen worten glich das

---

<sup>104</sup> Vgl. Lc 2, 29f.

schwert grundloses hertzlaid durch din sel tringen und die wort als ain fürini stral durch dich schüssen von unmässigem schrecken<sup>105</sup> Das die vergöttend sel hertz und gemüt dins zarten kindlis ligend an dine(n) arm und mägtlichen Brust da von och durch trungen und gepinget ward und das emßig ansehen sins todes in im ernúwret O du mägtliche kindbetterin Ach wie ist dir hütt geschenckt in dinen frölichen kilch gang Die scharpff wissagung da von din iungs müterliches hertz so ser erschrack das alle din [119] mägtlichen audren sich bewagtent und dine adelliche gelider erzittretend und din schönne glentzendi farw erblaichet Also wärt du din erst gebornen frucht setzen uff den altar und mit grösser inbrünstiger min(n) in uff opffren got dem himelschen vatter ze ainem gefelligen opffer für dich und für alle menschen O du kaiserlicher iüngling ihesu xpē Erwürdiger gottes sun Ach wie so ergebenlich du dich hütt opffrest dinem himelschen vatt(er) in der minn in der du mensch bist worden uns geboren Und für uns striten un(d) liden woltest und durch uns sterben und din vergötteti sel und din lutre zarte menschait mit aller costbarer verdienung uns fruchtberlich wider in ze laiten und ze fryen in unsren ersten höchsten adel Ach deß sag ich dir lob und er iemer ewe(n)clike(n).

dz gebett [120]

O lieber herr ihū xpē Ich bitt dich durch din hailgen opffrung und durch alle din minn und erbärmd so vergib mir und allen menschen die versumnus diner hailgen gebotten und räten und gesetzten usser der wir vil sind getreten mit ungehorsami mit übergon dins götlichen willens in súnlichen gedencken worten und werchen in ungeordnetem lust und fürung unsers libs und blütes Gib uns herr unsren sünden zewiderston und dine gebott und gesetzten mit underten(n)iger gehorsami ze volbringen Also das wir ernúwret werdint und geraingot von unser kranckhait und gebresten das wir gewirdiget werdint in ze génd in dem tempel dins Costbaren verdienens Da du dich ewiges wort dinem himelschen vatter für uns hast gegeben und alle zit und alle tag bist uff opffren. gib uns das unser sel und [121] hertz also darin versenckt werdint das unser gedenck wort und werch ain geselligs opffer werd dinem himelschen vatter Amen

Och uff disen hüttigen tag so gät man mit dem crütz und der Crützgang spricht also ze tútsch mit dem man grüzt unser lieben frowen

Die antiffen Ave gracia

GEgrüset sigist du voll gnad du edli magt gottes gebererin won uss dir so ist us gangen und erschýnen die sunn der gerechtikait die da erlúchtet die in der

---

<sup>105</sup> Vgl. Lc, 2, 34f.

vinsternus sint. fröw dich du gerechter alter symeon **Das** du empfahest an din armen den erlöser únsér selen der úns ist geben die urstendi<sup>106</sup>

**Antiffe(n)** Adorna thala. **Antiffen**

**S**yon du solt zieren din schläffkam(m)er und empfäch xp̄m den kúng du solt um(b)vahen mariam die da ist das himeltor **W**on sȳ[122] trait den kúng der eren **S**i bestāt ain iunckfrow und mit ainem núwen liecht fúrt sy den sun der da ist geborn vor dem tag sternen in iren henden den **S**imeon empfieng an sin armen und in us prediget dem volk das er wár ain herr des lebens und des todes un(d) ain behalter aller der welt<sup>107</sup> **an(tifon)** respōsu(rum)

**S**ymeon empfieng ain antwúrt von dem hailigen gaist das er nit sterben solt **E**r gesáh den(n) vor xp̄m den herren un(d) do sy das kind in gefúrtent in den tempel **D**o nam er in(n) an sin arm und gesegnet got und sprach. **N**un läß herr dinen knecht gon in frid<sup>108</sup> **an(tifon)** **Obtulerunt**

**S**y haind brácht für de herren ain par turtel túbli oder zway iungi túbli **A**ls geschriben ist in der gesetzt des herren<sup>109</sup> ¶ **N**achde(n) aber als erfüllt wärent die tag marie nach der gesetzt moysi do trúgent sy in(n) gen iherusalem [123] das sy in opffretint dem herren **A**ls geschriben ist in der gesatz<sup>110</sup>

**A**ber die collecten die man singt vor dem crútzgan(n)g die sprechent also **S**o man die kertzen wicht

**Collect**

---

<sup>106</sup> Vgl. Ave gracia plena dei genitrix virgo ex te enim ortus est sol justicie illuminans quae in tenebris sunt laetare tu senior juste suscipiens in ulnas liberatorem animarum nostrarum tonantem nobis et resurrectionem. Purificatio Mariae, Supplementary chants or uncertain usage, Responsory, Cantus ID 200456.

<sup>107</sup> Vgl. Adorna thalamum tuum Sion et suscipe regem Christum amplectere Mariam quae est caelestis porta ipsa enim portat regem gloriae novo lumine subsistit virgo adducens in manibus filium ante luciferum quem accipiens Simeon in ulnas suas praedicavit populis dominum eum esse vitae et mortis et salvatorem mundi. Purificatio Mariae, Supplementary chants or uncertain usage, Antiphon, Cantus ID g00068.

<sup>108</sup> Vgl. Responsum accepit Simeon a spiritu sancto non visurum se mortem nisi videret Christum domini et cum inducerent puerum in templum accepit eum in ulnas suas et benedixit deum et dixit nunc dimittis domine servum tuum in pace. Purificatio Mariae, Supplementary chants or uncertain usage, Antiphon, Cantus ID g00069.

<sup>109</sup> Vgl. Obtulerunt pro eo domino par turturum aut duos pullos columbarum sicut scriptum est in lege domini. Purificatio Mariae, Matins, Responsory, Cantus ID 007307.

<sup>110</sup> Vgl. Postquam impleti sunt dies purgationis ejus secundum legem Moysi tulerunt illum in Jerusalem ut sisterent eum domino sicut scriptum est in lege domini quia omne masculinum adaperiens vulvam sanctum domino vocabitur. Purificatio Mariae, Matins, Responsory, Cantus ID 007406.



**HErr** allmächtiger vatter ewiger gott du der alle ding usser nûti hast geschaffen und von dinem haissen durch das werch der imlinen zû dem fluss des wachs(es) hast geton komen un(d) der an dem hûttigen tag die begird des gerechten **Simeonis** hast erfüllt wir bittent dich demütenlich das du diss kertzen zû nutz der menschen und zû gesunthait der lib und der selen **Es** sig uff dem ertrich oder in dem wasser **Durch** die anrúffung dins aller hailgosten námen un(d) durch das gebett der sálgen ewigen magt marien und durch das gebett aller **Diner** hailgen so gerúch segnen un(d) hailgen dis kertzen die dis din volk [124] begert in iren henden ersamlich ze tragen **Erhör** die stim(m)en die dich lobent mit gesang oder mit gebett von dinem hailgen himel un(d) von dem stül diner maienstat. bis gnädig allen denen die dich anrúffent die du hást erlöst mit dem **Cosparen** blüt dins ain gebornen **Der** mit dir lebt un(d) richsnet ewenlich **Amen**

#### **Collect**

**Allmächtiger** ewiger gott der an dem hûttigen tag dinen ain gebornen sun in dinen hailgen tempel an die arm des hailgen simeonis hást geantwúrt **Wir** bittent demütenlich din gütikait das du diss kertzen die wir din diener und dienerinen in der grössi und er dins námen also enzúnt begerent ze tragen gerúchist segnen und hailgen un(d) mit dem liecht dins obresten segens enzünden **Also** das wir sy dir unsrem got werdechlich gerúchint opffren in den tem[125]pel diner gúnlich und das wir erhitzgot werdint in dem für diner aller süssesten minn da wir dir selchlich geantwurt werdint **Durch** den selben unsern herren ihesum xp̄m dinen sun **Amen**

**Die** andren collecten und segnen der kertzen sind och disem gebett gelich ¶ **Des** gelichen mit wychwasser mit röchen mit hailgen segnen und gebett so wicht man och die palmen an dem balmstag zû nutz der menschen und um(b) hail des libs und der sel **Also** wo die kertzen angezúnt und die gewichten palmen hin koment da von söllent un(d) müssent fliehen die gespenst der bösen gaisten vor dem behüt unns gott nun und iemer ewenlich **Amen**

**Das** erst hertzlaid was da die werde mûter maria opffret in dem tempel nah gewon[126]hait der gesatz zû der zit waß **Symeon** der gerecht in dem tempel und ain hailge witwe gena(n)t **Anna** die was ain wissagin die lobta das kind und erten got und **Symeon** vieng an und sprach

**Nun** lass herre dinen knecht nah dinem wort in fride **Wan(n)** mine ogen gesehen haben din hail **Das** du gemacht hast ze an gesicht dinem volk **Ain** liecht ze erlúchtung der dient un(d) ere dins volks von ysrahel **Die** ere sy dem vatter und dem sun und dem hailgen gaist **Als** er was in dem anvang und nun ist und all wegen in welt zû welt **Amen** **Unnd** do **Symeon** das lob also volbrácht do nam er das kind ihesum xp̄m an sine arme und sprach diss kind ist kom(m)en das hat got gesan(n)t zû ainem fall und zû ainer ufferstandung **Wann**

die verzag[127]ten sūnder wirt er ain fal die also gefunden werdent und den gerechten die got fürchtent ist er ain ufferstandung **A**ls das ewangelium spricht zu liechtmesse **W**ie wol der sūnder velt. stand nun wider uff und hab sich an das crütze ihū xpī so ist er gerecht das crütz betút die būsse und das büssent leben ist die sicherhait ewiger sálikait **S**ymeon sprach zū der rainen iunckfrowen und müter marie. frow min war ain swert wirt din sele und hertze durch schniden dis dines ihū crist wan(n) alles menschlich hail von im getröst solt werden **O**ch gecrútzget sterben und begraben **D**o erschrack die getrúw müter so sere das sy nie recht frölich was bis an ir end un(d) uffart und des máls verschnaid sy **S**ymeons schwert zum ersten do sy hort das ir liebes kind so [128] großlichen liden solt und das liden gieng ir durch ir hertze und sele als ain scharpffes swert

**M**aria müter und magt **I**ch bitt dich das du úns wellist erwerben gnad dines lieben kinds das wir alle mitliden mit dir tragen und das alles úns er werks ain genemes opfer sy in dem tempel únsers herren uff dem altar sines hailgen crützes in danckberkait das wir durch sin verdienen eweclich niemer von im geschaiden werde(n)

**M**aria ich ermanen dich des erschreckens den du empfiengt do der engel ioseph erschain und im sagt das er dich und din kind solt füren und flöchnen **I**n Egypten<sup>111</sup> land vor dem zorn **D**es kúns herodes als er din kind úns er herren getöttet wolt haben und sücht in under andern kinder **U**nd bitt dich kúngeliche mütter [129] maria frow voll aller gnaden und tugenden das du mich armen sūnder och wellest flöchnen vor dem zorn dines lieben Kindes an dem letzten gericht das ich der strengen räch miner manigvaltigen sünden icht gericht werde nach gerechtikait **S**under nach gnaden und barmhertzikait und dir und dinem lieben kind gedancken vil und menger ellenden herberge gebresten und mangel den ir hettent uff dem selben wege

**M**aria ich ermanen dich do du din kind drytag verloren hettest und in süchtest mit iämerlichem laid und wainenden ogen under dinen bekannten und fūnt an dem dritten tag sitzen under den maistern der iuden und in red und antwurt gab

**M**aria müter und magt erwirb úns gnad von dinem lieben kind ob wir in ie verloren haben mit úns er sünden tötlich oder täglich [130] das er sich welle lassen finden und den kreften úns er sele das er unsern fünff sinnen red und antwurt gebe **A**lso das ich und alle begerenden menschen in(n) vinden werden **A**men

**M**aria ich ermanen dich des grössen laides do dir san(n)t **I**ohanns sagt das die iuden din liebs kind gevangen hetten und fürten dz in der nacht in annas hus un(d) die iunger fluhen von im alle **D**as erbarmt din mütterlich hertze und du

---

<sup>111</sup> Großgeschriebener Anfangsbuchstabe, aber nicht rubriziert.

volgetest im nach wo er hin geführt wart und hett ain bittern grössen schmerzen von siner marter **D**u die ansächt und hetttest im gern geholffen do wolt dir des nieman gun(n)en

**M**aria betrübte müter un(d) magt erwirb uns gnad um(b) din kind das wir icht gevangen werden von unsern vigenden der welt des libs und des bösen gaistes **S**under die überwinden und das alle [131] únsér súnd und missetät von úns fliehen das únsér vygent icht mogen gesprechen sy haben úns angesigt

**M**aria ich ermanen dich der grössen betrúbnus dins hertzen do din lieber sun an dem crútze uff ward gericht mit zwain schächern un(d) din bitters liden der iomerigen gesicht dines suns tett im als we als sin liden das es hett an dem crútze

**O** **M**aria betrübte müter und martrerin **E**rwirb úns gnád dines lieben Kindes und das uns och din un(d) sin liden zü hertzen gang und dz wir das mit in(n)ekait und gantzer andächt betrachten und im und och dir des lob und ere sagen und das sin unschuldiger tod und sin bitter liden an úns armen súndern icht verloren werde **S**under die gnad des güten schächers mit getailt werde

**M**aria ich ermanen dich des [132] schmerzen do man dinem lieben sun von dem crútze nam und in für dich an die erde legt des iomerlichen gesichtes do du also totten und un gestalt sächt und sin lib als gar verwun(n)t und mit blüt berun(n)en was

**M**aria edle müter und martrerin durch dich gelittner rainer lib un sele iunckfröwlich art und müterlich ere **E**rwirb úns an dinem ain gebornen lieben kint das er nun alle ding überwunden hat das wir in den hailgen friden funden werden und mit dinem himelschen hofgesinde fröd und ewig wonung haben in dem ewige(n) leben **A**me(n)

**M**aria ich ermanen dich des iomers und lidens und grössen **S**chmertzens dins hertzen do din liebes kint in das grab gelait ward und bedeckt mit ainem stain und iohannes din lieber fründ dich dan(n)en fürt **D**em du demütenlich gehorsam wärt [133] **A**ls dich din liebes kind im enpfolhen hett an dem crútze **O** der ellende(n) tritt die du da tát mit menigen súnfftze(n) dines hertzen do du dich von im schiet

**O** maria kúngin aller eren **I**ch bitt dich das du dich von mir armen súnder nit wellest schaiden an minem letzten ende **S**under mir gnad erwerben von dinem kind und mich schírmen vor den bösen vygenden das ich icht begraben werde in der abgründ der helle **S**under bedeckt werde mit dem stain diner gnaden und dir und dinem lieben kind gehorsam syg in allen güten dingen das ich gediene das ich von úch niemer geschaiden werde **A**m(en)

**I**ch ermanen dich müter an das laid und an din bitter liden das dir in dem tempel ward gesait **A**in swert solt dich dúrch schniden din mägtlich hertz **O** bitter laid

behielt du in dim hertzen das dir her Symeon hat gesait din liden un(d) din Smertze(n) [134]

Das ander ser rüft ich gern an so bin ich laider gar ain tor und den schrecken den sy nam do sy ir liebes kind verlor mit zúchten cläglich sy da sprach Ach wo sol ich dich vinden. Owe laid und ungemach ir hend begund sy winden. Ich hab min liebes kind verlorn. und allen trost uff erden. Dz mich ze müter hat userkorn wes raut sol min nun werden

Des dritten sers ermanen ich dich maria das du vernempt din kind das wär gevangen Maria magdalena kam(m) Owe wie ist eß ergangen maria müter wo ist din sun min besunder fründ uff erden oder was hast du von im vernum(m)e(n) Sölt ich von laid nun sterben sprach die ellend müter sin. min kind das ist verrätten min hertz sait mir sin grössen pin das im die iuden tätent [135]

Des vierden ser ermanen ich dich Owe müter und raine magt do du din kind sächt iomerlich an dem crútz hangen mit zertonen armen ston in bitterlich nöten ze hilff wolt er sich vinden lon und für úns sich laussen tötten

Des fünfften laides erman ich dich magt O müter aller cristenhait du wärt an fröde(n) gar verzagt do dir din kind ward gelait ab dem crútz an dinen arm zü dinem rainen hertzen Won nun din bitterlaid erbarm den behutt vor allem Schmerzen O zarter lib wie bist du verwun(n)t din varwe ist dir entwichen Si kust ir kind an sinen mund der was so gar verblichen Owe muß ich von dir nu(n) gon und dich lon in der erden den man mir lebent nit wolt lon Wes rät sol min nun werden O gabriel du sprächt zü mir maria [136] Du bist gnaden vol was sol ich nun geloben dir ich wais von laid nit war ich sol Owe Symeon du hast war gesait min hertz ist wol durch schnitten Diss saitest du mir in dem tempel das ich han erlitten Owe müter und raini magt aller min trost lit an dir nim mich zü den henden din und behüt mich vor der helle pin

136

Du bist gnaden vol, was solich nun  
geloben dir, ich wais von laud mit  
war ich sol. O we Symeon du  
hast war gesait, min hertz ist  
wol durch schnitten. Ditt saitest  
du mir in dem tempel, das ich han  
erlitten. O we mütter und vamm  
magt, aller min trost sit an dir.  
Nim mich zu den henden din, und  
behut mich vor der helle pin.

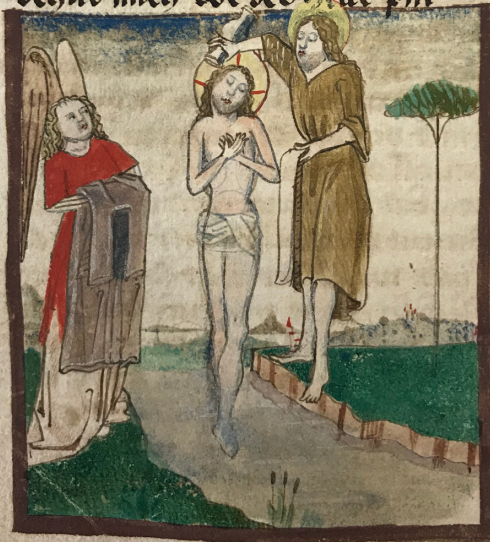

[137] **O** Hohi minn des edelsten mins herren ihū xpī **W**ie bist du dich fürbas  
 uswürken an dinen edlen min(n)zaichen. als du an dem trisgosten iar dins  
 lebens dich erzogtest an dem iordan **D**o dich iohannes din für löffer uskunt und  
 bredget allem volck un(d) mit sin selbs finger uff dich zogt und offenbart und  
 begirlich rüft do du gegen im giengt zü dem iordan das du das gewär lembli  
 gottes wärt **D**as uff im trüg all únsér súnd und der vertiefften demütikait das  
 du hoher lebendiger gottes sun in dem iordan von im getöffft woltest werden  
**E**ya was wonders hie beschach der himel tet sich uff **D**er hailig gaist ward  
 gesehen in ainer tuben gelichnus uff diner schaittel dich ze bezügen und die  
 vätterlich stim(m) rüft und veriach dich sinen [138] geminten sun in dem er ain  
 wol gefallen hat **A**ch in disem min(n)samen minnwürcken hast du úns mit dir  
 selbs vergöttenden person vor bereit gewicht und gesegnet das bädli den  
 hailgen töff der von dir und in dir gehailget und gewicht ist  
**O** gemin(n)ter gottes sun gib úns und verlih úns das wir in cristenlichem globen  
 funden werdint **U**nd in diner gewären luterkait gewaschen gerainget und  
 gelütret werdint von aller erbsúnd und gefrigt in únsér ersten unschuld und  
 wider in gelaitet in unser vätterlichen erbschaft **D**a wir dich ain geborner sun  
 únsér aller liebsten herren von dem wir alle gaben und gnaden so rilich  
 empfangen haind und alle zit empfhent da durch wider in gesenckt werdint  
 und geainget [139] in wärer gelychait dins götlichen bildes dinem minnenden  
 hertzen da wir dich ain geborner sun ewenlich werdint schowen und niessen  
 in ewiger glori **A**men



[Miniatur: „Sündenfall“]

139

in wäver gelichait Dins götlich  
en bildes Dinem minnenden hert  
en da wir dich om gebornee sun  
ewendich werdint schowen und  
messen in ewiger glori Amen

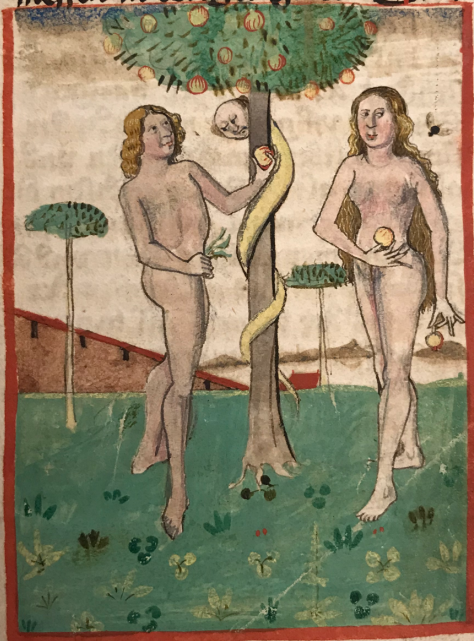



[140] O Du sälger cristenlich mensch der gern in dem willen gottes und nach sinem götlichen lob und ere leben wil Nim(m) flyssenclich war wie so zü größem nutz die müter der hailgen cristenhait dir das zit der hailgen fasten hat uff gesetzt in dem du din súnlich leben macht bússen und ablegen als du da vor an disem bûchli wol etwe vil geschriben findest an siner rechten statt und besunder durch das abbrechen der spis und des trancks all tag ze fasten ob du es vermacht Macht du aber nit liplich vasten so solt du aber den sünden und den untugenden fasten und absterben un(d) die selv fast ist die aller best Das aber din fasten es syg lieplich oder gaistlich und ander din übung die du besunder hast in dem zit der hail[141]gen fasten dem ewigen gott dester genemer und dester loblicher sig So schrib ich dir hie ain form und ain regel in weler mainu(n)g und minn du ainen ieclichen tag besunder die gantzen fasten. got zu lob und ze eren und diner sel zü nutz fasten und dich üben solt nach beschaidenhait won gott dem gefelt nit unbeschaidner dienst das der mensch tûg über das er vermug Darum(b) so spricht er durch den propheten in der epistel die man och list in der fasten Dis ist nit Das genem fasten dz der mensch sin hopt bezwing als ainen raiff Das ist die genem fast die ich erwelt hab Entledg die bürdi der unmittekait un(d) brich din brot Dem hungrigen un(d) die ellenden armen die für in din hus so du sichst ainen nackende(n) so beclaid in und verschmäch nit [142] din flaisch das maint dinen eben menschen ¶ Nun merck mit flyß wie du fasten sollest

DEr erst tag in der fasten den du fasten solt der ist die ästrig mickt Den vast un(d) üb alle güte werch die du vor dir hast in der minn und mainung allem dem liden das únsr lieber ihesus xvs unzallichen ie gelitten hat in den vier und trissig iaren in müter und uss müter lib in siner edlen wirdigen zarten geminten sel Des ist so unzallich vil das es nieman ergründen kan ¶ Den dornstag fast dem liden das er hatt von aller uner die gott sinem himelschen vatter ie erbotten was von aller menschen sünd und noch wúrd erbotten werden untz an den iungsten tag das doch sin alles gröstes liden was won er die e(e)r und das lob [143] gottes sins ewigen vatters min(n)et ob allen dingen ¶ Den fritag fast Dem aller grösten liden das er dár nach hatt das was das sin bitterer tod und alles sin cospar verdienen an so mengem menschen ewe(n)clich wúrd verloren werden ¶ An dem Sambstag so fast Dem unmässigen schmerzlichen liden das er in siner edlen sel trúg von dem grundlosen hertzlaid siner hertz lieben müter das er bekant kúnftig das sy mit im wúrd han in allem sinem liden DEr ersten Sun(n)entag in der fasten solt du dich üben in der minn un(d) mainung als únsr lieber her(r) mit bittrem liden an sah das im sin edels starcks leben wúrd abbrochen werden in der aller besti und blügendesti sins lebens Das was by den vier un(d) drissig iären ¶ Den mentag fast [144] allen sinen

verserten füs tritten won erzerter und empfindlicher was unden an siner solen  
 den(n) únsér aines in sinem og apffel und er den(n) luff von ainem land in das  
 ander trissig mil wit und brait da von er dick müd und heilig ward ¶ Den zinstag  
 fast allen sinen götlichen gedenken und hailgen Worten won er gedächt noch  
 rett nie wort. er mainte damit lob und er sins himelsche(n) vatters ¶ An der  
 mittwochen so fast allem sinem hunger un(d) túrst ¶ Den dornstag allem sinem  
 frost und hitz ¶ Den fritag allen sinen ellenden herbergen ¶ An dem sambstag  
 siner süssen ler und bitt in(n) das er die fruchtbar an dir machi  
 DE n andern Sun(n)entag üb dich in tugenden in der minn un(d) mainung aller  
 der wirdigen loblichen wirdigen zeichen so únsér lieber herr ihesus xpūs uff  
 ert[145]rich ie gewürckt hat und bitt in das er die gaistlich an dir volbring ¶ An  
 dem mentag so fast in der minn und mainung aller siner gedult in der er so  
 demüthenlich hat gelitten unzalich schmähi unwirdigi wort und werch der  
 iuden ¶ An dem zinstag fast als im die iuden dick uff sin leben sind gangen  
 Nun so woltent sy in fahen nun versteinen Nun über ainen hohen berg ze tod  
 ab erwerffen ¶ An der mittwochen so fast. als Cayphas den rät gab das besser  
 wär das ihesus stürb denn das gantz volck verdürb ¶ An dem dornstag fast als  
 in(n) an dem zinstag nach dem lidenden Sonnentag nieman herbergen wolt und  
 nachtes uf dem feld lag und betrüptenlich die wort sprach Die fuchs haind ir  
 húlinen und die vogel des him(m)els haind ire nestli Aber des men[146]schen  
 kind hat nit dar uff es sin hopt naig ¶ An dem fritag fast dz er an dem balmstag  
 so ellentlich uff den aubent von allen mensche(n) ward gelassen und allen  
 verrüft Also das im noch sinen lieben iungern nieman ainen mund voll brotes  
 gab das selb beschach im och dar nach an dem mentag und och an dem zinstag  
 und laid darzü größi versüchung und dür áchtung un(d) schmächait von den  
 iuden och in den selben tagen ¶ An dem samstag fast Als er darnach an der  
 mickten von iudas verräten und verkoft wart um(b) drissig pfenni(n)g und och  
 des selben tags so mit grosem iomer was by siner hertz lieben müter der er  
 alles sin liden vor hin seit  
 DE n dritten Sonnentag üb dich und betracht flissenlich das bitter ellend  
 schaiden [147] so únsér herr tritt. an dem grössen dornstag von siner lieben  
 müter und gedenck ouch mit grösser danckberkait wie er sich des selben  
 aubens hát gegeben in dem hailgen Sacrament sich och an mit inniclichem  
 mitliden wie er an dem selben ábent spät den blütigen schwaiß schwitzt an dem  
 ölberg ¶ An dem mentag so fast als er gevangen ward un(d) dem we so alle  
 sine zarten gelider empfiengent. Do sy in als ungestümclichen an fielent und  
 im sin haur uss sinem hopt und uss sinem bart röfftent und im so scharpfe band  
 an leitent ¶ An dem zinstag fast Als sy in verspüretent und im so  
 unmässeclichen we beschach von iren bösen áttum. do und och die gantzen  
 nacht und och den tag ¶ An der mittwoch fast Als die iunger von im all samen

fluhent und von allen menschen [148] ward gelassen und dem töt schrecken den únsere liebi frow empfieng do die armen iunger zü ir koment geloffen schryent und wainent und ir clagent das ir liebs kind und iro lieber herr und maister gevangen wär und nit enwistint ob er yetz tod oder lebet wär ¶ An dem dornstag fast als er für annas geführt ward und aller der not so er da laid und sunder von dem schmähen pinlichen strach so im geben ward an sin hailgeß zartes wang ¶ An dem fritag fast aller der angst und not so er laid vor Cayphas do er sin gewand zerraiß und über in(n) rüft zornlich und sprach Er hat got gescholten was dunkt úch güt und das volk alles úber in schray Er ist schuldig des todes und wie sy úber in wustend und im sin antlut verdacktent mit ainem sch[149]mekenden tüch ¶ An dem sambstag vast. als sy in schlügent uff sinen nack un(d) in hiessent räten Wer in hett geschlagen und des ersterbens das er do tett das er nit antwürt wer er wär als ob er es nit enwisti

AN dem Sunnentag der mittenfasten solt du din hertz uff erheben In ain gaistliche fröde von der unmässigen güti und mittikait des ewigen gottes Och won uff dem selben tag alle iär únsere hailger vatter der bapst den rosen der fröde um(b) treit zü ainem zeichen der fröde damit er alle sine kind der hailgen cristenhait die sich die gantzen fasten haind geübt mit fasten oder mit andern tugende(n) mit flyß nach allem irem vermügen des selben solt du och got dancken das er dar zü kraft un(d) macht hat verlihen und du solt in bitten [150] das er dir verlich das du dz übrig der hailgen fasten fürbas mugist volbringen nach sinem lob und nach diner sel hail Won das ist och únsere hailgen vatters des bapstes mainung der trost den er git sinen cristenlichen kinden um(b) das sy sich fürbas das hailig zit dester wilclicher lidint ¶ Des selben tags singt man och gar ain fröliche mess die vacht an letare iherusalem<sup>112</sup> Das spricht zr tútsch Fröw dich iherusalem das maint alle die hailgen cristenhait die sol sich denn besunder fröwen in got irem herren als úns das hailig ampt der mess betútet mit ainer núwen fröde ¶ An dem mentag nach mitterfasten so solt du fasten der gütikait und miltikait in der únsere lieber herr sant peter an sah mit sinen liplichen ougen Un(d) och mit den ougen siner erbärmd [151] do er sin verlognet hat und bitt in(n) das er dich mit den ougen siner gnaden an seh und dir all súnd vergeb ¶ An dem zinstag fast aller der haimlichen marter So er die gantzen nacht nach siner fancknus hatt erlitten der ist so vil das er bis an den iungsten tag villicht niemer me geoffenbaret wirt alles ¶ An der mittwochen fast als er für pylato ward geführt und da menge falsche lugi úber in gesprochen ward darzü er nüt antwürt also das sich pylatus selb verwundret von sinem schwigen ¶ An dem dornstag fast als er für herodes ward geführt vor dem und mit dem er ain wort zü sinem fragen im nüt antwürten wolt da von er groß

<sup>112</sup> Vgl. *Laetare Jerusalem*. Dom. 4 Quadragesimae, Mass, Introit, Cantus ID g00776.

verschmächt von im und von siner herschen knechten laid von worten und von werchen und besunder im ver[152]spottetent in dem wyssen claid da mit er in sant wider zü pylato ¶ An dem fritag fast dem grössen schrecken der er empfieng do in pylatus hieß gaislen un(d) er aller siner claiden entblözt ward da er sich ze grund erscha(n)t do er also nakent vor<sup>113</sup> inen stünd ¶ An dem Sambstag fast als er an die kalten sul gar scharpff und her(r)t gebunden ward und mit rüten un(d) gaislen aller sin hailger zarter lib zerschlagen und verhowen ward da von er mengen grim(m)en anchtzen ließ in im selber An dem lidenden Sonnentag solt du grüntlich betrachten wie menig töt mal und wie menig tieff wunden únsere lieber herr an der sul empfieng Also das von siner versinen untz an sin schaitteln unversert nüt als vil an im was beliben als [153] ain nadel spitz groß ist Und wie groß sin pin was so was er doch nit als vil gekert uff den schmerzen denn das er an underlās sin marter do und in andrer siner pin die er ie gelaid uff opffret sinem himelschen vatter für all únsere sünd und schuld ¶ An dem mentag nach dem lidenden sonnentag fast allem sinem hailgen blüt vergiessen von allen sinen tieffen schmerzlichen wunden. das im grösse kranckhait und änmächtikait machet zü sinem zarten herten und großen craftlosen in allen sinen gelidern und bitt in das er dich Dārin(n) wäsch von allen māsē diner sel ¶ An dem zinstag fast dem bittren schmerzen den er laid do man im die ruhen claiden über sin blütnassen serigen wunden anlait Die im glich darin(n) klebetent und verbachretent mit [154] bittrem we ¶ An der mittwochen fast als im die türmin kron in sin hailigs zartes hopt getruckt ward da von er tusent tötlicher wunden in empfieng und tusent rúnsenli flussent im über sin hailigs hopt und über sin versertes antlit ab O du kristenlicher mensch búg hie din hoffertig gemüt under disi scharpffi dürninkron ¶ An dem donstag fast der verschmächt als sy für in nider knúwetent und in spottlich grúztent und und sprachent. Gegrúztet sigist du ain kúng der iuden und in mit dem mer ror uff sin gekrönt hopt schlúgent das selb mer ror sy im in ainem gespött für ain kúngelich zepter in sin gerechten hannd gabent des hand was und ist allmächtig ¶ An dem fritag fast Als er zü dem hindresten māl für gericht ward [155] gefürt O mensch betracht die pinlichen fústritt die er gieng nah der gaislung und nāch der krönung Und bedenck och daby wie kraftloselich er stünd vor pylato und vor der grössen mengi des volks mit der türninenkron und mit dem purpur claid Und achtzig tusent man über in(n) rúfftent mit grúlichen luten stim(m)en Crútzge in crutzge in. mit solchen worten und deren gelich schruwent sy pylatu(m) an über in O der iomerlichen not do pylatus das iungst falsch urtail über in gab zü dem schamlichen tod des crützes Ach da von erschrack sin zartes hertz und erkaltet und erzittretent alle sine gelider von der

<sup>113</sup> In der Handschrift steht *von* mit einem ergänzten *r* über dem *o*.

forcht des bittren todes ¶ An dem sambstag fast dem tötlichen schrecken den aber sin hertz liebi müter empfieng do sy die iomerlichen urtail dūrch die [156] gantzen statt iherusalem hort us rüffen won sy och wol wist dz das uskūnden siner sel ain besunder sterben was. gedenck och daby an den grössen iomer den och all sin lieben frúnd hattent und bitterliches wainen umb das urtail das pylatus hatt gegeben úber das unschuldig blut

DEn Sonnentag des palmtags solt du mit grösser andacht volbringen und gar hertzlichen betrachten Das únsere lieber herr ihesus xpūs. also verschmācht wolt werden Der da was gott und mensch und der alle ding vermag das der also ze nūti wolt werden und verschmācht von sinen schnōden creatures Des e(e)r und gewalt ist úber alles das da ist in himel und in erd und der da ist der starck gott und untōdemlich und unlidenlich. Das der so kranck und so crafft[157]los in aller siner menschlicher natur wolt werden und ains so schamliche(n) iomerlichen todes verderben Und der der aller schönst was úber alle menschen das der von pin und von schmerzen alle menschliche form verlort und der in siner mārter nit gewist hett das er es wār gesin man hetti nit erken(n)t das er der schön ihesus nazarenus wār gewesen der prophet von nazareth –

An dem mentag nach dem balmstag so fast der ungemessnen marter die er laid do im das purpur claid usser sinen verbachreten wunden gezert ward und sini claiden wider darin verschwelt und verbachen und der bewegung der scharpffen türninen kron in sinem verwun(n)ten hopt und das selb och dar do sy in vor dem crütz ab zugent ¶ An dem zinstag fast der grössen angst un(d) not in der er dz hailg [158] Crütz us trüg und der grössen verschmācht das er selb sinen galgen müst tragen und der cläglichen blütigen füstritt die er gieng fürst das er us geführt ward Es war mit dem crütz oder an das crütz und das nider fallen und die haissen trähen under der schwären bürdi des crützes. won er wainet das sin würdig verdienen liden und sterben an so mengem menschen ewenlich verloren wurd werden ¶ An der mickten. fast Als er sins ungewaltes<sup>114</sup> ward fräuenlich geworffen uff das crütz und ward nider gestōssen das im sin wunden blütent und alle sine gelider wurdent ussenandren gezogen. das ains an siner rechten statt nit belaiß Als der hailig prophet davit in dem Salter spricht Sy haind gezelt alle mine gebain ¶ An dem hohen dornstag fast der grundlosen minn in der er sich hat gegeben in dem hailgen sacrament [159] und als er des selben abends den blütigen schweiß schwitzt an dem ölperg Diss süch alles da vor an siner rechten statt in disem bűchli geschriben Och soltu an dem selbe(n) tag fasten der grundlosen angstlichen not pin und bitterkait die únsere lieber herr hatt Do im die grössen stumpffen isinnen nagel durch hend un(d) füß geschlagen würdent Ach wie menig tod

---

<sup>114</sup> In der Handschrift steht *gewaltes*, oberhalb ist von derselben Hand *un* ergänzt.

schoss und herten tötlichen tod stoss bracht im das lang durch graben an sin zartes sterbendes hertz ¶ An dem sallen fritag solt du größelichen fasten allem dem liden. marter und pin So er ie erlitten hät Das solt du des tags gantz us betrachten von dem anvang bis an das end. als verr du kanst und vermacht Und besunder so fast dem unmässigen we dz er hatt do er so ungestümclich ward uff gericht an dem hailgen [160] fron crütz und daran hieng nackent und blöß in der aller grösten kelti die ie geward und iemer mer wirt bis an den iungsten tag. mit so menger tieffen wunden vierdhalb stunden lebendig in sterbender not mit andächtigem gebett und darzü in(n)eclichen wainet ze iungst do gab er uff sinen gaist in des vatters hend und starb ains so bittren todes Wär aller menschen töd by enandren gesamnet sy wärint alle sament nit als bitter als der ainig tod Nun spricht unser lieber her(r) O lieber mensch nun begüss disen bitterlichen tod und disen iemerlichen tod mit ain wenig haisser trähen So wil ich vergessen mins grössen schmertzen ¶ An dem österlichen aubent fast in der e(e)r unser lieben frowen ir unmässigen clag die sy hatt do ir liebs kind tod in dem grab lag von disem liden und och [161] irs Kindes liden süch da vor an siner rechten statt me an disem büchli

[Miniatur: ‚Vertreibung aus dem Paradies‘]

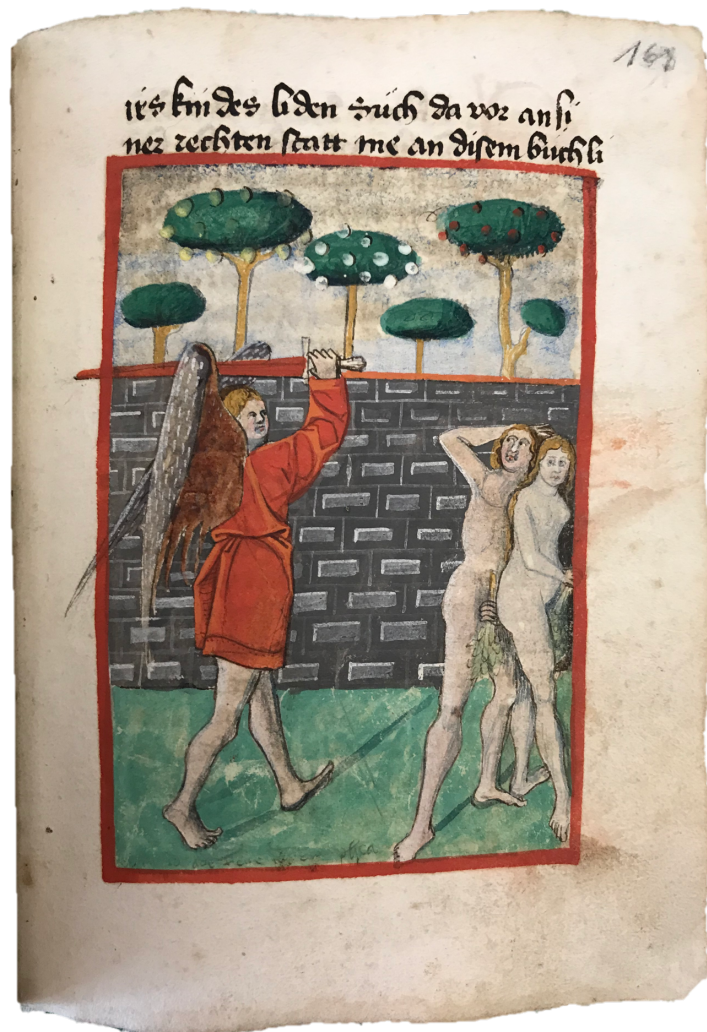



[162] **E**s komet das zit das die hailig cristenhait hin leit das **A**lleluia das ain frölich gesang ist und andri frölich gesang in der mainung als adam viel in den zorn gottes und wir alle durch in **U**nd adam uss dem paradys ward us getriben in das ellent diser zit darum(b) soltent wir den(n) hin legen alle unordenliche fröd diser welt **A**ls och darnach bald komet das zit der hailgen fasten in dem alle cristenliche menschen ain büß wirdig leben an sich sollent nem(m)en **U**nd besunder an der äschrigen mikten sollent sy mit grossem rúwen ir sünd die äschen von dem priester empfangen und sollent gedencken das sy wider zü äschen müssen werden **A**ls och der priester ob inen spricht so er inen die äsche(n) uff das hopt leit so spricht er disi wort **M**ensch gedenck das du erd [163] bist und wider umb zü erd wirst **D**is collecten und dis gebett spricht oder singt der priester so er die äschen segnet und sprechent zü tútsch also

#### die Collect

**A**llmächtiger ewiger got vergib denen die dich fürchte(n)t **B**is gnädig denen die dich an rüffent und geruch senden dinen hailgen engel von dem himel der da gesegin und hailigi dis äschen das sy sygint ain hailsam ertzný allen denen die dinen hailgen náme(n) demüthenlich anruffent und die sich selber schuldig gebent uss iren gewissni in iren gebresten vor der angesicht diner götlichen miltikait und die sich demüthenlich naigent für din gütigen mayenstat verlih úns durch die an rüffung **D**ines aller hailgosten námen das alle die die disi gewichte äschen über sich be[164]sprengent da durch empfanghint ablás iro sünden und gesunthait der sel und och des libs **D**urch xp̄m únsern herren ¶ **D**ie ander collecten sind och disen gelich **U**nd och dz gesang das man tüt die wil man die äschen empfächt **D**as rüfft alles zü dem milten got das er sich gnädenlich erbarme über úns armen sündigen menschen

**A**n dem ersten **S**unnentag in dem anfang der fasten **S**o singt man an dem anfang der metti also. **E**s sol úch nit uppig noch unnütz duncken früg uff ze stend vór dem tag **W**on der her(r) hat verhaissen die kron der wachenden<sup>115</sup> **U**nd fürbas singt man in der selben metti gar vil nützer vermanung un(d) güter ler so úns tüt die hailig cristenhait und spricht also

**N**Ement war diss ist yetz das [165] genäm zit diss sind die tag<sup>116</sup> zit des hails wir sollent úns halten in vil gedult in vil wachen durch die wäppen der gerechtikait der kraft gottes<sup>117</sup> in allen dingen sollent wir úns erbieten als die

<sup>115</sup> Vgl. Non sit vobis vanum mane surgere ante lucem quia promisit dominus coronam vigilantibus. Dom. 1 Quadragesimae, Matins, Invitatory antiphon, Cantus ID 001110.

<sup>116</sup> Oberhalb des Wortes *zit* ist von derselben Hand *tag* ergänzt.

<sup>117</sup> Vgl. Ecce nunc tempus acceptabile ecce nunc dies salutis commendemus nosmetipsos in multa patientia in jejuniis multis per arma justitiae virtutis dei. Dom. 1 Quadragesimae, Matins, Responsory, Cantus ID 006600.

diener gottes in vil gedult das úns der dienst nit verschmähet werd<sup>118</sup> ¶ Wir  
söllent úns verwandlen in ain bessers wir die da unwissentlich gesúndet  
habe(n)t das wir niht gáhes bekumret oder úberfallen werdint mit dem tag des  
todes So wir das zil der rúw und der búss sűchint und es nitt finden mugint.  
herr sieh úns an und erbarm dich úber úns Won wir habent dir gesúndet  
kum(m) uns ze hilff. gott unsers hails unnd durch die e(e)r dins námens so  
erhor úns<sup>119</sup> Der unmilt láss sinen weg und der bösman láss sin bösen gedenck  
und bekere sich wider umb zű dem herren und er erbarmet [166] sich úber in  
Won er ist gűtig und erbarmhertzig und vertragenlich úber die boßhait<sup>120</sup> Gott  
úns her(r) der herr wil nit des sűnders tod Sunder er wil das er sich beker und  
lebi ewenclich<sup>121</sup> Brich din brot den hungrigen un die ellenden armen fűr in din  
hus den(n) bricht uff frűg din liecht und die gerechtikait găt vor dinem antlit<sup>122</sup>  
Verbergent das alműsen in die schöß der armen und sy bittet fűr úch zű dem  
herren won glich als das wasser lösch das fűr Also er löschet alműsen geben<sup>123</sup>  
Die sind Paradisi Die zit der fasten tűt úns uff die tor des paradises wir söllent  
es empfangen mit gebett und mit andacht um(b) das wir an dem tag der hailgen  
urstendi úns mit dem herren mugint frűwen<sup>124</sup> an(tifon) Sider úns nun das zit  
der hailgen fasten so grössi un(d) nűtzi [167] frucht bringt des sol sich der  
cristenlich mensch grössenclich frűwen un(d) alles sin vermugen darzű keren  
das er nach gottes willen lebi Er sol och besunder den(n) flissenclich zű der

<sup>118</sup> Vgl. In omnibus exhibeamus nos sicut dei ministros in multa patientia ut non vituperetur ministerium nostrum. Dom. 1 Quadragesimae, Matins, Responsory, Cantus ID 006920.

<sup>119</sup> Vgl. Emendemus in melius quae ignoranter peccavimus ne subito praeoccupati die mortis quaeramus spatium paenitentiae et invenire non possimus attende domine et miserere quia peccavimus tibi. Dom. 1 Quadragesimae, Matins, Responsory, Cantus ID 006653.

<sup>120</sup> Vgl. Derelinquat impius viam suam et vir iniquus cogitationes suas et revertatur ad dominum et miserebitur ejus quia benignus et misericors est praestabilis super malitiam dominus deus noster. Dom. 1 Quadragesimae, Matins, Responsory, Cantus ID 006406.

<sup>121</sup> Vgl. *Non vult dominus mortem peccatoris sed ut convertatur et vivat.* Dom. 1 Quadragesimae, Matins, Responsory verse, Cantus ID 006406a.

<sup>122</sup> Vgl. Frange esurienti panem tuum et egenos vagosque induc in domum tuam tunc erumpet quasi mane lumen tuum et anteibit faciem tuam justitia tua. Dom. 1 Quadragesimae, Matins, Responsory, Cantus ID 006744.

<sup>123</sup> Vgl. Abscondite eleemosynam in sinu pauperis et ipsa orat pro vobis ad dominum quia sicut aqua extinguit ignem ita eleemosyna extinguit peccatum. Dom. 1 Quadragesimae, Matins, Responsory, Cantus ID 006012.

<sup>124</sup> Vgl. Paradisi portas aperuit nobis jejunii tempus suscipiamus illud orantes et deprecantes ut in die resurrectionis cum domino gloriemur. Dom. 1 Quadragesimae, Matins, Responsory, Cantus ID 007348.

kilchen und zü der hailgen bredgi gon zü dem wirdigen gottes wort da hört er das hailig Ewangeliu(m) won all tag durch die gantzen fasten ist ain aigen ewangelium da mag er verston die fruchtbaren ler únsers lieben her(r)en ihú xpī und wie gedultenclich un(d) gütlich er sich hat gehalten gegen sinen frúnden und figenden Er hörr wie er sich in der hailgen zit der fasten sol halten und och zü andern ziten Er sol och sins gebettes und besunder siner siben ziten den(n) fast geflissen sin wo er iena mag vor arbaiten oder vor rechter unmuß Nun vah an an dem ersten Sun(n)[168]entag in der fasten Und sprich diss gebett und och all tag durch die wuchen

O Gott des aigen ist sich alle zit erbarmen und ze vertragen. empfah gnädenclich únsere gebett das alle die. die da gebunden hat die kettin der sünden entlediget werd von der erbärmd diner miltekait Durch xp̄m unsern herren

**Sant Bernhardus bicht Oratio**

O min herr ihú xp̄ mit allen betrúpten und wär rúwige(n) hertzen vergieh ich dir all min súnd die bösen werch die ich getán hab die gúten die ich gelassen hab. luterlich als sy von mir beschehen sint als du sy von mir bekennest in zal in wág in mäs die verlornen tag in denen ich dich erzúrnt hab din lob gemindert von dem obresten güt gefallen bin. minen nächsten in fal gezogen han Därumb min ge[169]minter her(r) so nim von mir Das úbrig miner iären. für min armes lebe(n) und die iär die ich in verlust gelebt hab. min got verschmäch nit ain rúwig demütig hertz won min tag sind als der schatt vergangen un(d) verdorben ain frucht und ist unmuglich das ich sy herwider bring Herr lass dir gefallen das ich sy her wider gedenc in bitterkait miner sel O herr das aller tieffest ab grúnd mins armen lebens rúft dem aller obrosten abgrúnd diner erbärmd. den unerschöpflichen brun(n)en diner erbärmd lass in mir nit trucken werden umb min súnd Won du erbarmhertzig bist und nit enhattest der dingen die du geschaffe(n) hast und ab lässig bist der menschen súnd umb bessrung. Herr gib mir die gewonlichen úbel ze lassen und dir gefelligi werch ze würcken Den flyß den ich untz her han ge[170]hept in den sünden das ich den(n) fürbas úb in dinem willen Wo die súnd ist úber gangen das da din götliche gnad úber fliess. her(r) din aigen ist erbarmhertzig sin dir ist erlopt du macht tün was du welt Darum(b) so erbarm dich úb(er) mich Es ist ietz das zit der erbärmd der gnad und der bessrung Sider es nun ist die zit der gnad und der bessrung Ach so gib mir her(r) ze verdienen glori dins segens an dem tag mins endes Dz mich nit schlah das wort dins flúchs Ich bitt dich herr durch dich selber und durch din aller gütigosten müter marien der lobrichen magt Und durch die bett aller diner lieben hailgen das du mir vergebist alle min versumnus und unwissen Won mich rúwt das ich gesúndet han und begeren das ich verloren hab ze bessren Ge[171]denck her(r) ihú xp̄ Es ist nit din aigen ieman ze verderben Es ist din aigen erbarmhertzig sin und allwegent ze úber sehen und ze

vertragen. nit ze verlieren nument ze behalten Din vatter hat dich gesennt in dis welt. nit das du sin urtailist nument das du sin wider lebent machist und das du mit úns sigist und nit wider úns armen **Darum(b)** herr kum mir ze hilff an minem end din úber flússigi bessriung din min(n)sames liden **Der** schatz dines ros farwen blútes und die ernúwring diner búis **Das** erwirdig sacrament das da täglich geopffret wirt in der hailgen kilchen umb das hail der glöbigen in dem du selber priester und opffer bist **Du** bist der da geopffret wirt und dem da geopffret wirt. **Hie** ze erwerben gnad die ich nit erworbe(n) hab un(d) in der kúnfftigen zit ze [172] besitzen glou und rúw die din min(n)sames hertz úns ze ewiger fröd erworben hat **Amen**

#### der ander Sonnentag

An dem andern **Sun(n)**entag in der fasten **So** sprich dis gebett und die selben gantzen acht tag all tag und ist also

#### Gebett

**H**err erhör das gebtt diner bittenden und vergib denen ir súnd die sy dir veriehent dz du gütiger úns mit enandren gebist ablas und frid **Durch** xp̄m unsern herren **Amen**

#### Gebett

**O** Unsprechenliche und ungemessni erbarmhertzikait und endlose miltikait din(er) gütikait **Al**mächtiger ewiger got do die gantz welt um(b)schlossen wz in den súnden du schöpffer aller dingen und du ewiges wort in de(m) anvang der him(m)el und erd mer un(d) alles das darin(n) ist mit dem vatter [173] und mit dem hailgen gaist hast geschaffen du bist an allen stetten und erfüllst alle ding mit gutem. úber das bist du demütenclichen komen in dis welt und hast die grössen súnder die unmilten die bösen die unrainen **E**ebrecher und eebrecherinen die hüren die manschlächtigen die schacher. die din verlognet hattent und die dich hattent gescholten und die nit zü dir woltent **Die** hast du erbarmhertziger herr zü dir bekert **Darum(b)** so rüff ich arme súnderin voll aissen voll wunden um(b) geben mit tusent faltigen<sup>125</sup> súnden zü dir won du bist milt **Des** sagen ich dir gnad und danck und du fröwst dich der súnder die sich bekerent zu dir. erbarm **Dich** uber mich won ich bin nider gefallen und verdorben in minen súnden min iugent han ich ellenclich verzert und alles min leben [174] verloren won ich han mich all wegent gefröwt gelustes diss gegenwirtigen lebens ich han min hertz geführt in zitlich fröd und in uppigi e(e)r won ich uber maß han gehept liplich begird **Darum(b)** so so beken(n) ich min grössen súnd **Aber** du milter got empfah min claini rúw un min armi bicht **Die** verlih mir vor dem tag mins todes und gib minen ogen trähen der gewären rúw

---

<sup>125</sup> Nachfolgend steht in der Handschrift *wunden*, unterpungiert und mit rot durchgestrichen.

das ich all tag mug wainen min erschrokenlichen grössen sünd die ich von vili nit gezellen mag Und enzünd in mir das für ainer gewären rúw und an gedenknus miner sünden Also das ich alle zit hab vor den ogen mins hertzen den tag des iungsten gerichtes und die fröd des him(m)els die du dinen lieben hailgen berait hast gib mir ze entrinnen der pin der hell und verlih mir etlichen tail der ewigen sälig[175]kait die ze besitzen mit dir ewenlichen Amen

hie vindest du noch me gütter gebett an dem dritten Sonnentag Sprich diss gebett und die acht tage.

Ora(tio)

O Herr erzög úns din unsprechenlichen erbarmhertzikait also das du úns von allen únsren sünden us zúhist un(d) úns von den pinen die wir darum(b) verdienet haínd gnádenlichen erlösist Durch xp̄m unsern herren Amen

Gebett

O milter artzat leg die ertzný diner grundlosen erbärmd in die wunden der sünden miner sel. nim hin von mir die füli und den bösen geschmack der haimlichen gebresten gewissni won des die menschen erschrekent ze hören Das wilt du allain tragen won dir ist allain geben von dem vatt(er) [176] úns ze richten der du bist mit enandren únsrer richter únsrer fürbitter und únsrer beschirmer by dem vatter Ich flúh zu dir won du bist milt Erbarm dich úber mich und betracht das wesen miner kranckhait und erzög úber mich die grössi diner miltekait won nieman ist güt denn du allain und nim mir ab Die schwären búrdi miner sünden Die mir von miner iugent sind an gehaftet und an mir haínd zú genomen und gewachsen zú böser gewonhait von denen rainge mich gnádenlich und das selb och all mini frúnd. herr wider gedenk nit miner gebresten noch och miner frúnd gebresten noch nim(m) nit rechnung von únsren sünden O her(r) ihú xp̄e Du gütiger gott won du doch darum(b) mensch bist worden das du menschlicher natur kunt tätist din erbarmhertzikait Senck [177] in min hertz geware minn dins götlichen willen Also das ich din niemer vergess und diner unzallichen gütet so du úns geton hást und on underläß túst. ler mich her(r) all weg ze gedencken an min sünd darum(b) das du ir ewenlich vergessist O du tröster hailger gaist mach lind und erfröw min stainin hertz Also das der böß gaist enkain statt in mir find Besunder der gaist des frides und der miltikait der da ist ain verliher und ain geber alles gútes der enzúndi min hertz mit siner götlichen gnád uss der ich alle tugent úb Und würck untz uff min end und das ich an dem iungsten gericht mug hören die frölichen stim(m). koment her ir gesegneten mins vatters besitzent das rich Das úch berait ist von angeng der welt und mich den(n) fürist in die unzerhenglichen [178] fröd da ich lobe und eri iemer ewenlichen

An dem vierden Sonnentag In der fasten So sprich diss gebett und die gantzen wuchen all tag

○ Gott du bist der der da erzürnt wirt von únsere missetät und aber gnädig wirst von únsere rúw Sieh miltenclichen an Das gebett dins volks und ker hin von im die gaisel dins zornes die wir um(b) únsere súnd verdienet haind Durch xp̄m únsere herren Amen

#### Gebett

○ Herr ihú xp̄e Der du bist des menschen sun durch din demütikait und bist gottes sun in diner ewigen mayenstat und hast under den lúten gewonen un(d) dir ward in ainer verschmácht von dinen fygenden zü geleit ain wort Das úns armen súndern gar not [179] türfftig ist und och nütz das sy sprächent du wärist ain fründ und gesell der offnen súnder won vil größer súnder zü dir aller miltesten bekertist von irem irrigen bösen lebe(n) Ach darum(b) so bitt ich dich das du mich armen ellenden súnderinen och ansehist mit dinen erbarmhertzigen ogen won ich so vil súnd hab geton dine hailge gebott hab ich manigfaltelich über treten und von miner iugent uff. bin ich all weg gesin. hoffertig gitig úbergelústig In spil in tranck úbermässig ungehorsam zornig din glöbigen hab ich durch ácht betrúpt geergret mit minem bösen bild. Her(r) ich hab ab mir hin geworffen din süßes Ioch und din lichte búrdi und hab da für hert isnin kettinen der súnden und ainen múlin stain der súnden größer schuld an minen unsálgen [180] hals gehenckt Aber du aller miltester gott lass mich darum(b) nit versenkt werden in die hell als ich wol verschult han ○ her(r) ich hoff hütt zü dem gemainen tor der súnder das ist zü diner grundlosen erbarmhertzikait die du hattest do du die menschait an dich nempt in dem rainen kúnschen lib marie umb das du menschlich natur zü gefügtist und veraintist diner gúti Ach min gott und min her(r) Raing min unluter hertz da durch ich mich so lang von dir geverret han das ich enzúnd werd mit der hitz dins götlichen gaistes. Also das ich all weg gedenck daran wenn ich von diser welt us gefürt wirt wie fast mich Denn min súnd rúwent so ist es mir kain nütz zü der búss besund(er) da ist nüt den(n) ain grissgram(m) Der zen wie vil ich clagen und wainen mit unzállichem gebett wie vil [181] ich schrýg und rüff den(n) so erhört mich nieman noch enhilfft mir och nieman Darum(b) gúter her(r) ihesus berait hie im zit die frucht der rúw in minem herten das ich dórt gerúch vinden den trost diner erbarmhertzikait Tillg ab von mir in diser welt alle min súnd um(b) das ich in der kúnfftigen welt von dir ewenclich behalten werd Verlih mir von diner gúti in diser zit in dinem dienst emptzeklich ze beliben um(b) das ich in ettlichen tail diner erwelten mich mit dir in diner götlichen angesicht gerúch ewenclichen ze fröwen in gottes na(m)men Amen

An dem fünfften Sun(n)entag in der fasten der da ist gena(n)t der Sunnentag des lidens xp̄i So vacht an die hailig Cristenhait ze begán das liden ihú xp̄i Und begat man es vierzehen tag [182] won was die Cristenhait in dem zit nacht und tag singt und list untz uff das ampt des österlichen aubens das ist alles von dem

liden únsers her(r)en oder aber des ain gelichnus und ain figur **Darum(b)** so  
söllent den(n) alle **Cristenliche** menschen alles ir hertz und gemüt keren in ain  
betrachtung des wirdigen lebens lidens un(d) sterbens únsers lieben herren und  
das och täglich flissenclich üben mit andächtigem gebett und betrachtung dis  
vierzehe(n) tag besunder **Also** das es in ie wedrer wuchen gantz us kom von  
dem anvang untz an das end als verre es den(n) dem menschen muglich ist ze  
begriffen als ich es hie nach under schaiden wil uff ietlichen tag besunder

**An dem lidenden Sunnentag sprich diss gebett und betrachtung mit andächt**  
[183]

**O Du** kúngelicher her(r) von hymelrich **Ich** ermanen dich das du von grösser  
minn liest din rich und sancktest dich in diss tieff ellend das du mir die  
himelschen haimüt erkoftist für den liecht rychen him(m)el der so schon lucht  
erwaltest dir amen stal in dem du geboren woltest werden **Ach** din hohe(n)  
almächtikait und din tieffen wýßhait woltest du verbergen under dem schin  
aines unwissenden kindlis durch mich **Darum(b)** das du mich wis machetist  
gegen dir **O** dinen erschrockenlichen gewalt hast du getrukt und dich erzögt in  
aines erstum(m)eten kindlis wis ungewaltig din selbs durch mich **O** herr hunger  
und tirst und grössen mangel in tieffer armüt hast du gelitten durch mich das  
du mich gespistist süssenclich und mich rich und sälig machtist ewenclich.  
frost und [184] hitz trügt du das du mich vor der winterkelti und hitz der ewigen  
pin beschirmtist **Du** wärt der aller ellendest durch mich umb dz ich din  
himelsch rich gewun(n) durch dich **Eya** aller miltester her(r) unzallich erbärmd  
hast du erzögt uff diser erd **Du** spistest die hungrigen un(d) gäbt das liecht den  
blinden. gesunthait den siechen und das leben den tötten und den súndern der  
rúwen und das du mir gebist ze bekennen din überflüssigen güti dins gewaltes  
**Ach** herr ich bekenn och din tieffen demút das du der rúwender súnder gast  
woltest sin als **Matheo** un(d) zacheo marien magdalenen du empfiengt die  
súnder mit frölicher begird so sy zü dir von den súnden sich kertent **O** min  
lieber herr du hattest uff erden nie güten tag durch mich **darum(b)** **Das** du mir  
frölichen tag er[185]arnetist ze haben ewenclich by dir **Eya** du wärt voll  
überflüssiger miltikait do du úns ze spis gäbt dinen aller hailgosten  
fronlichna(m) und din aller hailgostes **Costbarestes** blüt da mit wir bewärt  
würdtint vor dem hunger und tirst des ewigen todes und bitt dich lieber her(r)  
das du dis din grundlosen min(n) also gruntlich senckist in min hertz und in  
min sel das ich mich also halt das din hailger fronlichnam min iungster fründ  
werd und min **Iungste(r)**<sup>126</sup> súnfftz min iungstes we **O** herr du hast mich gelert  
alle wyshait und alle kunst und tugent mit din selbz hailgen mund in dem

---

<sup>126</sup> In der Handschrift steht *iungsten* mit einem ergänzten *r* über dem letzten *e*.



hailgen ewangelio hast du mir geoffembart alle wärhait du bist dik müd worden und hellig von gon und von ston und von wandlung durch mich das du mir die ewige(n) rûw und rast kostist durch dich **Alle** [186] din grössen arbeit hast du gelitte(n) durch mich und für mich **Und** mi(n) schuld und sünd hast du gar hert und schwär gebüst mit dir und schwär und bitter sind sy dir worden ze bezalen für mich und also pinlich das du den blütigen schwaiß schwitztost **Und** uff das ertrich wärt vergiessen durch mich und in angstberlichem strit so din edli sel hertz und gemüt warent von sorgen der aller grösten not un(d) pin. so du für mich und für min sünd liden woltest das du mich von der helschen not erlostist **Eya** dārum(b) stünt du uff und gābt dich willenclich in den gewalt **Der** unmittesten menschen so ie geboren würdent und bitt dich lieber herre ihesu xpē **Durch** diss bitter liden und durch alles din liden das dz an mir also fruchtbar werd dz ich von dir niemer geschaide(n) werd **Amen** [187]

**An dem mentag der lidenden wuchen So sprich dis gebett un(d) vermanu(n)g**  
**O** Du himelscher zucht maist(er) **Ich** ermanen dich fürbas in miner betrachtung das du würt von den helschen hunden geiagt un(d) mürdenclich geschlagen und gestössen úbel und unerlich gehandelt vertreten und verworffen gebunden und gezogen **Ach** din wunnecliches angesicht ward von den grim(m)en wolffen zertert und zerschlagen vermäsget **O** du liest dich und gāpt dich willenclich gefange(n) durch mich das ich erlöst wurd durch dich **Eya** du ain richter der lebende(n) und der tötten würt mit grösser ungestümikait gezogen für die richter **O** wie still schwigend hortest du die lügenhaften zügen clagen über dich als über den aller bósten menschen **O** du der ān alle schuld bist woltest für min grösse schuld geschulget [188] werden und ains lasterlichen todes nach vil schanden und spottes werden vertailt **Aber** ze meru(n)g dins schmerzen und bitterkait un(d) zü grössen **Uneren** wurt du ab gezogen und aller diner claiden berobet und vil hert gebunden an aine staineni sul durch mich und ān all erbärmd für min sünd ward din zarter schöner lib zerhowen und zerschlagen mit den scharpfte(n) gaislen das von dinem hopt bis an die füss gantz unversertes nütz belaiß und du also verwunt in dinem blüt stünt **Ach** du wärt wol um(b) geben mit den aller grim(m)esten löwen die dins flaisches **Un(d)** blütes gesetet würdent **O** du min vil lieber her(r) ihú xpē **Wie** stāst du hie vor mir durch mich gebunden unbeweglich **Ach** alle din crafft ist von grösser ser un(d) schmerzen von dir entwichen [189] du bist durch mich yetz erlos und siglos worden **Ach** dins zertenten durchhownen lips mit so menger tieffen wunden **Owe** dins aller grösten schmerzen den du mit frostigem zittren in der scharpfensten kelti wärt erliden durch mich **Ach** herr ich clagen dich mit erbarmung und getrúwem mit liden mit dir ellenden ungetrösten martrer dem ietz von blütlösi und von grösser Schmerzen und ser diner wunde(n) wil dir stim(m) und aller diner kraft gebresten **Ach** wo ist din rûw oder wo

enthaltest oder lainest du din hopt **O** wen(n) hät ain end din grossi bitterkait  
wo ist ieman der dich erlös oder von disen aller grim(m)esten schleglen  
beschirm in disem angstberlichen notstal bist du gegange(n) durch mich **O**  
lieber her(r) durch diss liden und durch alles din liden hilff mir das ich von  
dinem götliche(n) [190] antlút niemer geschaide(n) werd **Ame(n)**

**An dem zinstag der lidenden wuche(n) So sprich diss gebett**

**O** Du zarter minneclicher gottes sun Ich ermanen dich fürbas dins grössen  
lidens in miner betrachtung **O** herr ich sieh an din trähen Ich hör din súnfftzen  
mit getrúwem mitliden mit dir won du herr giltest hie ietz für mich **Ach** was  
ruwen bist du warten so du uss disem not stal kunst **O** we getrúwer her(r) du  
wurt nach grosser not und arbeit enbunden do<sup>127</sup> laitent sy dir zü grösssem spott  
ain purpur claid an un(d) ain kron mit scharpffen dornen trucktent sy dir in din  
hailigs hopt und knúweten für dich un(d) grústent dich mit grösssem spott **Sy**  
namptent dich iren kúng den sy doch hattent geschlagen und gegaislet als ainen  
súnder **Beclaidt** [191] als ainen toren **Gekrönt** mit dornen durch howen **Ach** sy  
verspuwtent dich mit iren unrainikait als den aller ungenemesten hin wúrff **O**  
aller miltester min her(r) **Ich** knúwen für dich und in minen gedenken sieh ich  
dich an **O** we dins grössen schmerzen und din laster und unerren **So** du für úns  
lidest und der tieffen wunden dines hoptes und dins berun(n)en götlichen  
antlits **Mit** fliessen dins hailgen blütes **O** we der herten schleglen uff din hopt  
**Ach** dins wunden hoptes und diner tobenden towenden wunden dins erholeten  
hirnis **O** was tät du in disen grössen arbeiten **Ach** das wasser unzallicher  
trähnen flussent von dinen betrúpten ogen und das blüt von allem dinem lib  
und dinem verwun(n)ten hopt **O** du wundt din hende zesamen und mit grösser  
arbeit [192] vertrucktest du das rúffen und schrigen von dem schmerzen der  
we túnden stich der tornen in dinem wunden hopt **Ach** du säst also uff dinen  
wunden und das purpur claid verhaftet in dinen schwellenden wunden **O** we  
getrúwer min herr du sächt betrúptenelich din pinger an ob de kain mitliden in  
sy möcht **Aber** sy verbundent dir dini ogen und als ainen toren hiessent sy dich  
räten wer dich hetti geschlagen **O** du her(r) der da allain ist än súnd wärt disi  
schand und une(e)r erliden für all min hoffart **Ach** du wärt als ain unschuldig  
lembli das under der grim(m)en wolffen gewalt ist und es zerzer(r)ent un(d) es  
darnach essent **Und** bitt dich min hertz lieber her(r) das du mir gebist din hailig  
bitter liden also zeeren dz ich von dir niemer geschaiden werd [193]

**An den Mitwochen der lidenden wochen bett also**

---

<sup>127</sup> Nachfolgend steht in der Handschrift *laitest*, unterpungiert und mit rot durchgestrichen.

O Geminnter lieber herr Ich ermanen dich fürbas do sy din sel erfultent mit spott und liden das niemer bis an den lungsten<sup>128</sup> tag sol gantzlich bekan(n)t werden un(d) sich ersattent diner marter und müd würdent Do brächtent sy dich für pylato der fürt dich in die angesicht alled diner figenden die da stündent und dins ellenden todes mit grösser begird und belangen baittent und hiess pylatus sy dich todt verwun(n)ten menschen ansehen O we herr sy rüftent aber úber dich mit der aller grösten ungestümikait das man dich wunden halb toten menschen und ellenden marter sölti Crützen oder hencken Ach wie durch gieng dis geschrai din verwun(n)tes hopt und halb totes hertz [194] O und nach grösser clag und rüffen úber dich do ward dz Iungst urtail geben úber din unschuldiges leben das sy dich söltint töden nach allem irem willen Ach du miltes hertz du frowtest dich alle zit irs hails und ires güten Aber sy frowtent sich dins bittren lidens und sterbens mit grössen fröden Aber sy clagent und rüfftent fygentlich úber dich O we hie ist erfult der spruch des propheten úber dich Es<sup>129</sup> hât úber mich geschruwen und geclagt alles ertrich und als die risen sind sy wider mich gestanden O we lieber min her(r) sy laitent dir din gewand an und zugent dich mit grösser we und schmerzten den du lidt do sy dir das purpur claid uss dinen wunden gezartent ungestümeclich un(d) än all erbärmd wúrfent sy den trom(m) des Crützes uff dinen ver[195]wun(n)ten ruggen und zugent dich also mit grúlichem geschray hin dúrch die statt iherusalem da luffent dir nach Iung und alt und alles volk dich ze verspotten O getrúwer lieb(er) her(r) dins ellenden gangs under der schwären búrdi des Crützes O unschuldiges lembli du traist aller der welt súnd uff dir ze bússen Ach wie hat din ellender gang hútt geendet dúrch mich Er endet nit das man dich welli widerbringen oder din wunden hailen well und verbinden O we her(r) sy wellend dich voll töden und all din wunden grim(m)enclich von ain andern ziehen. also kempt du an die statt und das crútz wart von dir geworffen und vil angst und arbit hást du erlitten won du ainen hohen berg uff giengt mit dinen tieffen wunden und krancken gelidern O her(r) Durch die schwären búrdi die du trügt. nim mir. und allen [196] menschen ab die búrdi aller únsrer manigfaltigen súnden Also dz wir von dir niemer geschaiden werdint Amen

An dem dornstag der lidenden wochen So sprich diss gebett und vermanung mit andaucht

O Du mägtlicher zarter herr Ich ermanen dich fürbas in miner betrachtung wie sy dich uszugent almüter nackent So<sup>130</sup> schönen lib gesah nie man noch wib so misshandelt Du wurt berobet aller diner claider vor angesicht alles volks in

<sup>128</sup> Großgeschriebener Anfangsbuchstabe, aber nicht rubriziert.

<sup>129</sup> Großgeschriebener Anfangsbuchstabe, aber nicht rubriziert.

<sup>130</sup> Großgeschriebener Anfangsbuchstabe, aber nicht rubriziert.

dem din raines hertz von schamen erstarb **O** we lieber her(r) sy würffent dich uff das **Cr**ütz das sy geboret hattent und bundent dir ain sail an din hailgen hend un(d) füß und zerspantent dich als ainen saiten **A**ch diner krachenden gelider **S**y durch schlügent din rechten hand mit ainem grossen nagel der [197] schmerz din miltes zartes hertz dūrch brach und din angesicht verwandelt **O** we herr sy flūchetent dir un(d) du bāt für sy **S**y schultent dich un(d) du entschulgetest sy **A**ch wie brāchent sy dir den linggen armen von dinem hertzen **A**ch was schmerz(e)n was do in diner rechten hand do die wund von dem nagel schlitzt **O** sy dūrch schlügent dir also gespannen und zerzogen hend und fuß das sich din edels hertz da von bewagt **A**ch min lieber her(r) du wārt sūnffitzen und wainen **A**ber niema(n) was der dich trosti **O** we du liest mengen grim(m)en anchtzen **A**ber ān din mūter und san(n)t Iohan(n)sen<sup>131</sup> hatt wenig. ieman mitliden mit dir noch erbärmd über dich ¶ **O** du gewaltiger her(r) himmels und der erden du list under dinen fýgenden geneglet hend und füß **A**ller diner gelider ungewaltig als der trúbel under [198] den füßen der trotten und gússet über flússenclich von dir den zarten zypper win dines hailsamen blütes **O** sel min fall für dinen gott und her(r)en und für dinen erlöser und sprich mit ainem andächtigen mitliden den hertzen als ob er gegenwürteclich vor dir sig **A**ch ich arme sūnderin betten dich hútt an in diner grösten not und bitterkait als du da vor mir bist mit genegleten henden und füßen übergossen mit trähnen und mit dinem hailgen blüt da mit wāsch mich un(d) alle menschen von allen únsren gebreste(n) **A**lso das wir mit geraingoten ogen únser selen dich ewenlich schowen müssint in den himelschlichen fröden **A**men

**Am fritag der lidenden wochen Sprich diss gebett und vermanung mit andaucht**  
**O** Du hoh gelopter schatz und [199] du hail aller diser welt und du liechter schýn himels und der erd die du erlúchtest mit diner clarhait von dinem tod erschrack billich und erzittret die erd und die sun(n) erlasch **O** wir bettent dich an ainen kúng aller kúngen ainen herren aller her(r)en **E**ya wie so túr und kostbarlich du úns erlöst hast **A**ch sy sind din spotten aber du bittest für sy **S**y sind dich schelten und du bist sy entschulgen **O** we her(r) min und wil lieber her(r) **A**ch du bist vil betrúptenclichen wainen bitterlichen trähen **O** und nieman ist der dich tröstet du sūnfftest und anchtzest **A**ber wer hat ain mitliden mit dir du möchtest wol sprechen wie ist hútt aller erbärmd an mir vergesen **O** we herr war solt du dich keren du hast doch nit so vil enthaltes daran du din verwun(n)tes sterbendes hopt möchtest gelainen **E**ya du [200] gewaltiger her(r) du hangest ungewaltig diner hend und füß nider sigent mit schwärem hangendem lib und aller diner gelider in sterbender not ¶ kerest du dich zū diner lieben mūter der betrúpt ist also groß das es din hertz **D**urchringet

<sup>131</sup> Großgeschriebener Anfangsbuchstabe, aber nicht rubriziert.

kerest du dich zû dinen figenden die spottent din kerest du dich zû dinen fründen die bekennt dich nit me din **I**unger sind von dir geflohen. **K**erest du dich zû dinem vatter der wil das du geltist mit grösser bitterkait für den sûnder **D**as er sin gerechtikait getür ögen an den bösen und die gûten fûre in sin rich durch die craft un(d) frucht sins todes du hiengt als ain spott diner figent un(d) als ain durch schÿnendes schwert diner mûter hertz **A**ch du unschuldiges lembly du bist ain genemes opffer dinem himelschen vatter für alle menschen **D**u wârt der [201] schöpffer und der erlöser und der behalter **A**lle din allmächtikait was verborgen under dem schin ains ellenden verworffnen sünders **A**ch du hiengt mit verwun(n)tem lib mit zerzertem flaisch **O** du gemin(n)ter gottes sun owe diner grössen müdi aller diner ungewaltigen genegleten gelidern hend und füß und dins aller bittrosten schmerzen **E**ya dins betrûpten anlites und dines lidenden hertzen un(d) dins wunden verserten hoptes un(d) diner wainenden ogen **O** dines uswallenden blütes dins türren hertzen un(d) dins türstigen mundes **A**ch du clagtest dinen turst **D**o wûrdt du getrenckt mit essich und mit gallen dz wz din labung in dinem tötlîche(n) türst **O** we die súnfftzen des todes haind dich um(b) geben **A**ch lieplîches leben din gaist ist ietz in angsten des todes **O** we her(r) alle din figent [202] haind dich grim(m)enlich um(b) geben des ertrichs witi ist dir verzigen ze rûw won **D**u min geminter her(r) an dem engen notstal des crútzes also hangent sterben müstest **E**ya din aller hailgosti gott minnendesti sel befällcht du dinem himelschen vatter für úns mit genaigtem hopt mit zerspannen armen. mit genegleten henden und füssen mit nider gesignem lib mit gebrochne(n) hertzen von dem tod und von iomer und begird nah mir **E**ya din hailgi sit ward uff geton und din erwidiges hailsames blüt floß von dinem gemin(n)ten hertzen **O** we nâch grösser arbeit und angstbarlichem sterben an dem galgen des crútzes als din lib und dine gelider lang samclich erstürbent **D**o wûrt du also töten ab dem Crútz gelöst und diner lieben mûter an ir arm gegeben und nach ir aller bittre[203]sten clag **S**o wûrt du in ainen stain beschlossen **A**ber din sel ain edli sel úber all selen **E**rfrowt die gefangnen in der vorhell und erlostest all din fründ und an dem dritten tag erstünt du mit grössem gewalt und mit kúnlichen eren **N**u(n) müss der tod und die arbeit ihesu xpī únsers erlösers und behalters úns behütten und behalten ewenclîche(n) **A**men

**An dem balms aubent so sprich diss gebett und vermanung das da haisset die siben zit man mag es och durch das iar all tag betten zû den siben ziten dz wâr gar fruchtbar und ist also die metti**

**A**lle fröd ward betrûbt alle wyßhait ward verrauten **A**ll allmächtikait bett an sinen vatter **A**ller der weltbehalter schwitzet blütigen schwaiß **A**lle tieff ward gesücht in der nacht [204] **A**lle trúw liess sich vinden **A**ller gewalt ward gefangen **A**lle krafft ward gebunden **A**lle sterck erzittret **A**lle hailikait ward

vershmächt Alle schone ward an gespuwen Alle gedult ward versucht Alle edelkait ward verspott Alle hilff ward verlaussen ane hilff

#### Gebett

HErre ihū xpē des lebenden gottes sun wann Du zū metti zit geborn woltest werden. dinen vatter an bett dinen vñenden engegen giengt Die iuden nider schlägt mit worten von iuda valschlich gegrüsset und geküsset von den iuden gevangen und gebunden von dinen iungern verlässen von den iuden verspott verspuwen us geführt an din baggen geslagen von sant petern verlognet den zū rúwen ermanet für Caypha geführt valschlich überzügt din ogen verbunden verspuwen un(d) uff dinen hals geslagen und zū [205] der selben zit erstünd von dem tod Gib mir durch dich ze liden in disem leben und uff ze stān von den sünden zū den tugenden das ich dich muge gesehen in galilea mit dinen iungern Der du lebst und regnierst mit gott dem vatter

#### prim

Aller der welt laiter ward gevangen geführt für pylatum Alle ere ward valschlich enteret und beschuldigt Alle urtail ward verurtailet Alles gericht ward gericht Alle fryhait ward verspuwen und geslagen

#### Gebett

HErre ihesu xpē des lebenden gottes sun wann du zū prim zit wurd gebunden für pylatum geführt in das richthuse und falschlich beschuldigt und an dinen hals geschlagen zū der selben zit erscheinest du marien magdalenen Erschине och miner sele durch dine götlich gnad und gib mir wäre rúw über [206] alle min sünd und das ich hie also urtail das ich icht an dem letzten gericht zū der ewigen pine geacht werde Der du lebst un(d) regnierst mit got dem vatter und dem hailigen gasit eweclich Ame(n)

#### Tertz

Alle fryhait ward an die sul gebunden und geslagen Aller der welt lon ward gekrönet mit dornen Alle blösse ward geclaidet mit rotem gewand Aller frid ward betrübt Alle blödikait ward scham(m)rot Alle hoffart ward genaigt Alle rúw ward müd von der marter

#### die Collect

HErr ihū xpē des lebendigen gottes sun Wan(n) du zū tertz zit für herodes wurd geführt von im verspott und vershmächt mit ainem wyssen claid wider zū pylato geführt An die sul gebunden mit gaislen gerten geslagen mit dornen gekronet mit roren daruff [207] geslagen knúwend für dich verspott mit rotem gewand geclaidet den iuden also gezaigt Besýt geführt der warhait gefragt un(d) zu der selben zit den hailigen gaist dinen iungern in gust un(d) mit dinen gnaden ir hertze entzuntest Gib mir minem hertzen war rúwe dz ich wol muge bewainen alle min sünde und entzündet werde mit dinen gnaden das ich dir

anhafft und och mit der in giessung des hailigen gaistes getröst werd der du lebst und regnierst mit gott dem vatter un(d) dem hailigen gaist eweclich Amen

#### Zü der Sext

Aller fride ward betrübt alle höhe ward nider getruckt alle zierde ward enblösset Alle lennge ward gespannen Alle braite ward zertrennet Alle sterck ward kranck Alles hail ward gewundet Aller trost be[208]laib on(e) allen trost Alle güti die wainet

#### Collect

HErr ihū xpē des lebenden gottes sun wann du zü Sext zit vertailt würd zü töten und usgeführt würdt mit den schächern. din crütze trügt mit mirren getrenckt diner claiden enblösset an das crütze genagelt uff gericht die hailigen fünff wunden enpfienget von den schächern geschmächt von den iuden verspott für din vünd gebetten. dem schächer gnad geton getailt und los geworffen um(b) din claid. zü dir lieber herre So flüh ich armer sündler empfang mich milteclich mit Dinen armen der barmhertzikait und hail die wunden miner sele mit diner ertznye Also das ich gerainigt werde von sünden und verdien ain tempel des hailigen gaistes werde hie und in ewikait Der du lebst und regnirst [209] mit gott dem vatter eweclich Am(en)

#### Non

Aller richtum ward arme der lebend brun(n) ward türstig Alle süssikait ward getrenkt mit essich und mit gallen Alle zartlichait ward bitterlich gekestget Alle still und senft erschray an dem crütze Alle erbarmde ward gemartert on erbarmde Das leben aller toten erstarb Der aller liebste schied sich von der aller liebsten Die appotegk aller gnaden und der segner aller hailikait ward uff geflossen Alles wunneclich ward iamerlich Alles liecht ward tunkel

#### Gebett

HErr ihū crist des lebenden gotz sun wann du ze None zit dine liebe müter bevelcht sant iohansen und sant Iohannesen siner müter Schruwt an dem crütze min gott warumb hästu mich verlaussen Als du sprecht mich türst. getrenckt würdt mit essich un(d) gallen [210] Spracht Es ist volbracht Spracht vatter minen gaist bevilh ich in din hende Die stain spielten Der umb hang raiß. Die toten stünden uff Din sele erlost die altvätter uss der helle Als dir din syt ward uff gestochen und zü angesicht diner lieben iunger ze himel fürt und och Adam und Eva uss dem paradise uff die zit verstössen würdent mach min hertz lebendig mit der gäb diner lieb. das ich dich also lieb habe das min sele und min begerung mit dir in dem himelriche wone dz och min flissiger gelust von der behügd diner marter an mir sterbe Das ich och tailhaftig werde diner trostunge Der du lebst und regnierst mit dem vatter und dem hailigen gaist Amen

#### Zu der Vesper



Allder weltlöser ward gelöst von dem crütze Alle wunneclich ward iämerlich Alles [211] liecht ward tunkel Alle tugent ward gelait uff das ertrich Alle beschaide ward beschwärt Alle züversicht ward geclagt Alle gnad ward gegossen mit den zähern

#### Gebet

HErr ihū crist des lebende(n) gotz sun wann du ze vesper zit dinen iungern tugentlich dinen hailigen lichnam gebt und in ir füß wüschst und in die trucknetest mit ainem linin tuch In bredigetest ain süsse lere Dinen vatter für sy bat. genomen würt von dem crütze uff das ertrich gelait Bitt dich lieber her(r)e nim von minem hertzen alle missetat Und gib mir das ich mit luter gewissen mines hertzen die selbe(n) gnad und hailikait dines süsen fronlichnams also empfah das sy mir sig ain ertzný hie und in Ewikait<sup>132</sup> Der du lebst und regnirst mit dem vatter und dem hailigen gaist Amen

#### Zü der Complet [212]

Alle herschafft die dient Alle fürsichtikait die sorgt Alle unschuld die vorcht ir Alle allmächtikait die bitt Aller der welt behalter switz blütigen schwaiß Alle luterkait ward gewunden in ain tuch Alle liebe ward hin genomen Alle demüt ward genaigt in ain grab Aller gloub ward bedeckt mit ainem stain Alle miltekait die blaiß ain

#### Collect

HErr ihū crist des lebende(n) gotz sun der du zü Complet zit us giengt uff den berg oliveti trurig und betruht würt dinen vatter Drystund knúwende bät. getröst von ainem engel und gesterckt Blütigen<sup>133</sup> swaß geswitzt in das grab gelegt. beschlossen mit ainem stain und versigelt. mit hütern behüt von den frowen und diner lieben müter bewaint Bitt ich dich lieber her(r)e das du mich von der uppikait [213] diser welt erlösen wellist und von mir nem(m)en alle böse trurikait und von minen ogen füren zäher aines rechten mit lidens Also das ich dine hailigen wunden dinen tod und marter also bewaine Das ich von dir verdien getröst werde hie un(d) in dem ewigen leben der du lebst un(d) regnirst mit gott dem vatter und dem hailigen gaist eweclich Amen

O Allmächtiger gott du hast nit geschonet dinem sun Sunder du hast in um(b) únsar armer sunder willen geben in den tod her(r) ihū xpē sun des lebendigen gottes der du gesprochen häst Ich wil nitt den tod des sünders Sunder ich wil das er sich bekere und lebe Der süsse nam(m) únsers her(r)en ihū xpī und der erwirdigost nam(m) der sáligen Iunckfrowen marie siner müter syg gesegnet eweclich [214]

---

<sup>132</sup> Großgeschriebener Anfangsbuchstabe, aber nicht rubriziert.

<sup>133</sup> Großgeschriebener Anfangsbuchstabe, aber nicht rubriziert.

[Miniatur: ‚Christus segnet die Welt – Göttliche Vorsehung‘]

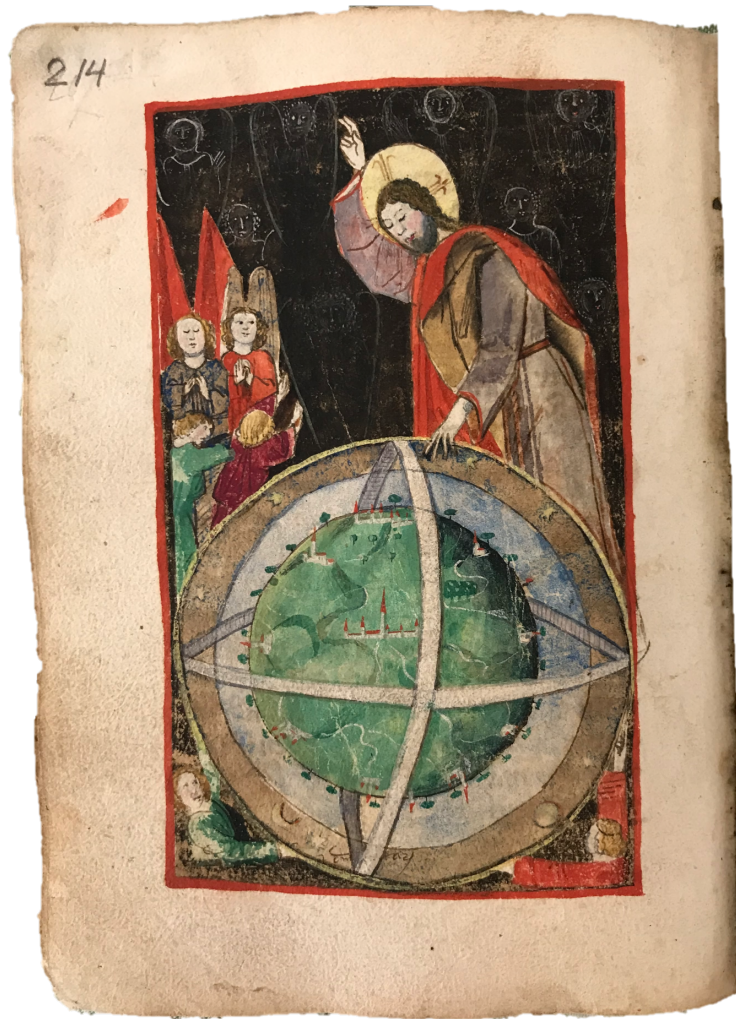

[215] am suntag fach an dise vermanunge(n) un(d) durch die wuche(n) von ain tag zum and(eren) wie here nach statt<sup>134</sup>

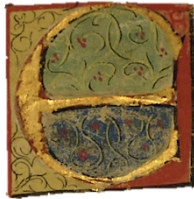

<sup>135</sup> **E**wiger ursprung alles güttes **I**ch loben dich **D**as du wärt in dem adel diner götlichen natur un(d) enkainer creatur bedorftest won **D**u bist ie und ie **D**ir selben gnüg gesin für alle creature(n) **D**o zwang dich din unmässigi göti **D**as du geschüft himel und erden und alle creaturen mit dinem götlichen gewalte und mit diner wyßhait ordenotost das sy nüt besser mochten werden und sy mit diner göti uff enthaltest das sy nüt verderbent. **H**erre und loben dich um(b) alles das güt das du mit allen creaturen ie gemaintest und bitten dich das du mir gebist **D**as ich ain iecliche creatur kunne gemin(n)en und gemainen nach der luterkait [216] als sy sind von dir usgeflossen un(d) nach dinem lob und miner ewigen sälikait und bitt dich das du mir vergebist wa ich ie dekain creatur gebruchti oder genos hab wider dinen götlichen willen **H**erre ich loben dich des rilichen us sendens als engelsche natur us floß von dinem götlichen hertzen du hast sy luter gemacht än alle flecken du hast sy gefryet vor aller ursach aller gebresten ir fryhait häst du also an dich gebunden das sy niemer von dir geschaiden mugent. ir min(n) hast du also enzündet das sy alle zit in diner minn brinnend sind **S**ÿ sind die die da rilich schöpffent von dem lebenden brun(n)en und hitzelich begerent wann so sy ie me schöpffent so sy ie me türstet. sy sind die denen din götlich antlüt allzit gegenwirtig ist **S**y lobent dich frölich sy dienen dir [217] unverdrossenlich **S**y sind in den **E**wigen frid gesetzt in dem niessent sy dich gelustlich **S**y sind die die da sicherhait haind empfangen aller der dingen die sy von dir haind das sy in dem eweclich beliben sond **I**ch ermanen úch lieben engel der fröden so ir hetten an dem ersten anblick des wunneclichen spiegels der hohen gothait da ir úch selben und alle creaturen so adenlich sahent in dem götlichen spiegel und bitt úch das ir mir erwerbint rechte erkanthus min selbes armüt und gebresten und den grundlosen schatz siner minne und siner göti **I**ch ermanen úch lieben engel des minneclichen krefftigen keres so ir zü got tätent damit ir verdientent stätikait und sicherhait in dem valle der bösen englen das ir ainen ogenblick von im niemer me getün mugent und bitt úch das ir mir erwerbint ainen [218] also krefftigen ker und zu gang zü gotte das ich von im erwerbe sicherhait des ewigen lebens **I**ch ermanen úch der fröden so ir haind dz ir wissend das úwer fröde iemer eweclich weren sol und das ir got iemer me niessen súllen nah allem úwerm willen und bitt úch das ir mir um(b) úwern

<sup>134</sup> Diese Rubrik ist von einer anderen Hand als der Haupthand in schwarzer Tinte nachträglich ergänzt und nicht rubriziert.

<sup>135</sup> Siebenzeilige Feldinitiale mit Blattgold und Rankenwerk.

geminten erwerbint das ich werd empfinden den trost den er verborgen hett in dem hailigen Sacrament<sup>136</sup> also das ich in eweclich werde mit úch niessen **I**ch loben dich herre des adellichen us ganges als menschlich nature us gieng von dinem götlichen hertzen und das du den menschen geschüft und das du in bildotest nach dir selben un(d) alle creatures im ze trost geschüft und satztest in in das paradís der wollust das er das niessen solt än alles we nach sinem willen **A**ber von menschlicher kranckhait und von [219] dem rät des vigents úber gieng er din gebott und er ward vertriben in das ellend und ward undertenig dem flúche der gerechtikait **U**nd bitten dich das du allen den flúch und den schaden den ich ie gewan von der erbsünd oder von menschlicher kranckhait von dem rat des vigents an mir verwandelst in ainem ewigen seggen **I**ch ermanen dich herre das der zorn zwúschen dir und menschlicher natur werte me denn fünff tusent iår das niemant so hailig wz der den menschen lösen möcht **A**ber du hettest den schatz **D**u wårt aber nút sin nächster **D**er mensch was sin nächster er hatt aber nút schatzes **D**o ward ain mensch türer den(n) das gold und ain luter mensch kostbarer denn das gemalen gold [I]ch<sup>137</sup> ermanen dich herre der begirde un(d) des iomers so die propheten un(d) die patriarchen hatten nach diner göt[220]lichen zükunft und des starcken rüffens so sy zü dir täten mit iamrigem hertzen und aller der begird so ie minnent hertz nah dir gewan und aller der begirlichen ladungen ald<sup>138</sup> dich hertz zü im gelatte **U**nd dancken dir von allem minem hertzen das du mich hest gelån werden in der zit der gnaden **I**n der zit so begirde in menschlich hertz niemer so bald komen mag du sijst<sup>139</sup> ze hand gegenwürtig das du hast verdienet **U**nd erarnet mit diner menschlichen natur **U**nd bitten dich das du mir also grössen iomer gebist und begirde nach dir das du mir nút verzihen mugist du komist zü mir nah aller miner begird und nottürfft und das alle mine gedenke wort und werch un(d) mainung so ain minneclicher rüff und laden zü mir. also **D**as du dich niemer nie von mir geschaidist [221] **I**ch ermanen dich herre der minne in der du gedächt die gedenk des frides das du din ewig wort woltest senden in menschlich natur **U**nd bitten dich dz du in diner minne in der du mir din ewiges wort gondest das es min flaisch und min blüt an sich nam das du mir och gunnist alles des minnrichen dienstes so er dinem götlichen hertzen ie getet für mich das mir das ze troste und ze helfe kome an der stunde so ich sin aller nottürftigost bin **I**ch ermanen dich her(r)e der gehorsami das du dich erbútt **D**em vatter in allem dem liden so zü únsere ewigen sálikait horte do du sprácht

<sup>136</sup> Großgeschriebener Anfangsbuchstabe, aber nicht rubriziert.

<sup>137</sup> I-Initiale fehlt.

<sup>138</sup> Schreibfehler?

<sup>139</sup> Anfangsbuchstabe eigentlich ein *f*, also *fijst*, das kann hier aber nicht stimmen.

vatter minr ist dis was gewitter uff gestanden dūr mich so sende mich in das mer **Du** würt wol gelassen in den grund aller bitterkait das dir die wunden giengen untz an din sel **Min** her(r) gib mir schnelli gehorsami und ain verainten wille(n) mit dir das die in(n)rekait und der grund [222] mins hertzen und miner sel mit dir veraint werde als min natur mit dir veraint ist **Ich** ermanen dich herre der minneclichen demütigen naigung so du tät von himelrich uff ertrich in dis ellend von der aller grösten fryhait in die aller strengosten gehorsami von dem grösten richtum in die aller grösten armüt von der gröste(n) e(e)r in die aller grösten verschmächte von dem ewigen leben in den bittre(n) tod von der überflüssikait alles güttes in die kranckhait menschlicher natur ane sünde **Und** bitt dich min her(r) das du dich noch hütt zü minem hertzen und zü miner sel naigist mit dinen götlichen gnaden und alle min menschlichen nature erfüllist mit dem adel diner götlichen natur dār um(b) du an dich hest genomen menschlich natur **Ich** ermanen dich herr der gnadrichen naigung so du tett zü der edlen sel ihú xpī die du uff [223] den selben puncten do du sy geschüfft erfultest mit götlichen gnaden als unmäseclich das sy nüt me empfaen mochte **Gott** mocht ainer lutren creature nüt me geben gnaden **Und** bitt dich das du dich noch hütt zü miner sel naigist und mich erfüllist mit dinen götlichen gnaden als verre als es ainer creatur müglich ist in zit ze empfaende **Ich** ermanen dich her(re) der lieplichen naigung so du täte zü der sel und zü dem hertzen und dem lib diner zarten müter wa si din nach zimlichait wirdiger was denn din ie creatur würdi won **Du** hattest si gezieret mit volkomenhait aller tugenden die dinem götlichen hertzen aller best gevielen und bitten dich das du dich noch hütt und ze allen ziten zü minem hertzen naigist un(d) mich zierist mit allen tugenden **Die** dinem götlichen hertzen aller genemest von mir sind und mich din wir[224]dig mache als verre als es ainer creatur müglich ist in zit **Ich** ermanen dich herre diner frölichen wun(n)eclichen gebürt mit der du min her(r)e und min got min brüder bist worden und min geselle in disem ellende der engel kunte den hirten fröde **Un(d)** alle creatures frowten sich wan du widerbrächte den bruch den alle creatures nüt wider bringen mochten und da sich alle creatures frowten da waindest du die ewige fröde **Ich** bitte dich min herre das du noch hütt in mir geboren werdist mit sölicher minne und begirde dz du wider bringist den bruch den alle creatures nüt wider bringen mögent und das du mir abwäschist die trähen des ewigen flüches **Ich** ermanen dich herre des frides so du brächt von himelrich uff ertrich du machotest frid zwüschent gott und dem menschen und de(m) [225] engel und dem menschen da von sprach der engel ich kúnd úch den ewigen frid um(b) ainen gúten willen **Min** herre und min gott mache solichen frid in dem grund mines hertzen de(n) kain liden betrüben noch geierren möge und gib mir allen gúten willen ze volbringende nach dinem aller liebsten willen **Ich** ermanen dich herre diner

ellenden lieblosen gebürt das du herre aller creaturen woltest geboren werden  
 an ainer offnen sträs und würdt gebunden in böse windeli und gelait in die  
 engen krippen als ain füter des vihes uff das herte höwe das es dir schnatteren  
 machote in din zartes libli du da spiseest alle creaturen woltest gespisset werden  
 mit ain wenig milch du bist ain herre aller dingen und hattest alles des du ie  
 geschüfft nüt das ze troste oder liebi horte **M**in herr erfülle min unmässigen  
 gebresten mit [226] dem hord dines rilichen dienstes und die úberflüssikait  
 mines libes widerleg mit der armüt und dem gebresten diner zarten  
 menschlichen natur **I**ch ermanen dich her(r) der veraingung das du mit  
 menschlicher natur also veraint bist das du dich von menschlicher natur nüt  
 geschaiden macht das únser menschaiť darum(b) fröde und trost habe an diner  
 menschaiť nach dem iungste(n) tag **U**nd bitte dich min her(r)e das du die  
**I**nnekait und den grund mines hertze(n) verainist mit diner gothait **A**ls min  
 natur mit diner natur veraint ist un(d) das ich e von dirre welte niemer  
 geschaide ee es alles volbracht werde **I**ch ermanen dich her(r)e das alle  
 wissagunge an diner menschlichen nature erfüllet und volbracht ist und  
 sunderlich das david vor tusent iauren gesprochen hatte **E**rbermd und warhait  
 sind enander begegnot gerechtikait und frid haind enander ge[227]kússset die  
 warhait die da hatte gesprochen wenne ir das obs essent so sond ir sterben des  
 ewigen todes der begegnote die erbermdie die da sprach **I**ch han den menschen  
 geschaffen ich wil in och lösen du strengi gerechtikait die da sprach der mensch  
 der da sündet der sol des ewigen todes sterben **D**ie kuste der minnekliche frid  
**D**er da sprach weler stunde weles ogen blickes der sünders ersúnfftzet so wirt  
 siner sünde niemer me gedächt un(d) bitte dich min herre das du ewe(n)clich  
 alles das an mir vollebringest das du von mir begert hast **I**ch ermanen dich  
 herre der natúrlichen naigunge so du hest zú menschlicher natur me den(n) e  
 das du mensch wurdist wan du die ewigen ewikait hest das wir dir anhaftin **D**ú  
 messikait die kúrtzi das wir dich empfiengen **D**er verwissen mögi [228] **I**ch  
 ermanen dich her(r)e der grundlosen demüt das du in dem bilde der sünders  
 woltest erschinen dar an das du beschnitten woltest werden nach der alten ee  
 und von der minne das du din blüt ze dem ersten male verguste un(d) so schiere  
 an viengte arbait un(d) not ze liden **D**urch minen willen untz an din ende **U**nd  
 bitte dich das du mich mit dinem kintlichen blüte wäschist von allen den  
 gebresten miner unwissende **I**ch ermanen dich her(r)e dz dir der honig  
 fliessende und der süsse nam ihesus ward gegeben der das getichted ward und  
 floß von dem vätterlichen hertzen **D**er hohen gothait und bitt dich das du mir  
 hútt und an minem end sigist ain volle fröde aller miner trurikait in der ich  
 ergetzet werde alles mines iämers und ain genuchtsam(er) hord und richtum in  
 dem ich ergetzet werde aller miner armüt und [229] mines gebresten und ain  
 minneklicher hailer aller miner wunden und siechtagen sel und libes und



gewaltiger behalter **I**ch ermanen dich herr das du mit dem liechte diner hohen erkantnüsse erlúchtest die hertzen der kúngen in dem land da die sunn uff gát **U**nd der hertzeclichen begird in der sý dich süchten und der fröde in der sy dich funden von min(n)en ir gabe brachten mirren wir(r)och und gold und bitten dich min **H**erre und min gott das du mich wisest den aller besten und sichersten weg zü dir mit luter erkantnüsse wan ich als verre von dir gegangen bin **D**z mir alle die welt nüt gehelffen mag und gib mir hertzlich begirde in der ich dich sůche **D**as ich dich in gantzer fröd finde und dir von mi(ne) mine gabe bringe mirren aines bittren rúwen wir(r)och ain übung inwendig und uswendig zü dinem [230] götlichen dienste. gold götliche min(n)e das ich von minnen lässe alles das dir an mir misse vallen mag **I**ch ermanen dich herre der minne und der demüt **D**as du zü dem tempel brächt wurde dinem vatter zü ainem opffer für únsere sünde un(d) woltest erlöset werden mit dem opffer der armen nach gewonhait der alten E<sup>140</sup> **I**ch bitten dich vätterliches hertze dz du ansehist dis opffer und es in aller der minne nemist für mich als er sich selben dir ie geopfferte für mich und für alle creaturen **U**nd bitten dich das du mir gebist **D**as ich mich noch hütte und zü allen ziten konne geopfferen von rechter minne mit hertzen und mit libe als es dir allerbest gevallet und beraite mich dir selben zü ainem wirdigen tempel und zü ainer wonung da du eweclich inne wonen wellist **I**ch ermanen dich herre der hertzecliche(n) [231] begird mit der du empfangen würdt von dem alten Symeon der din so lang begert hatte und sprach zü dir her(r)e **N**u lässe dinen knecht nach dinen Worten in dem frid won min ogen haínd gesehen din hail **M**in herre un(d) min gott gib mir das ich dich noch hütt empfahe mit solcher minne und begirde das du mich lássist in dem frid das ich mith dehainen sünden noch untugenden númen bedürffe striten **I**ch ermanen dich herre das du vertriben wurt von dem land diner gebürte in das ellend **S**iben iår un(d) alles das ellendes so du hettest die siben iår von hunger und von túrst von frost und von hitz und das so menig unschuldig kind dír dich ertódet ward und bitten dich das du mir ze hilff kumist in allen dem liden **S**o mich iemer an gát in disem ellend<sup>141</sup> **U**nd gib mir das ich min hertz und alle min sinne ziehe von al[232]lem dem das du nüt enbist das ich nach disem ellend mit fróden werde widerkerende in dem ursprung von dem ich geflossen bin ane alles mittel **I**ch ermanen dich her(r)e das du wüchste an alter und an wyßhait by gotte und bi den lúten und das du erzogen würt in arbeit und in ellende in armüt und in gebresten **M**in her(r) und min gott wan ich erzogen bin in allend und in armüt liplich un(d) gaistlich so gitb mir das ich hinnanhin

<sup>140</sup> Großbuchstabe, aber nicht rubriziert.

<sup>141</sup> Nachfolgend steht in der Handschrift *mit fróden*, unterpungiert und mit rot durchgestrichen.



wachse und zü nem an allen tugenden **I**ch ermanen dich her(r)e dz dich din müter fürte ze iherusalem zu dem hohzitlichen tag und dich da verlör dry tage un(d) dry nächte un(d) das sy dich mit grosser trurikait sūchte und do sy dich vand **D**o sprach si als inneclich zü dir kint mins wie hast du uns getan ich und din vatt(er) haind dich gesūchet mit grössem schmerzen **D**o sprācht du ernstlich [233] zu ir was ist das ir mich gesūcht haind wissent ir nit das ich den willen mins vatters müs volbringen **M**in herr gib dich mir als inreclich ze sūchen das din götlicher wille an mir müsse volbracht werden **I**ch ermane(n) dich herre das du mit inen hain gienget und wart undertenig dinem vatter und diner müter min her(r) gib mir dinen willen also ze volbringende in allem minem leben das du miner begirde und minem gebett müssist undertenig sin nach dinem lob und miner nottürft

**An dem Montag So bette dis**

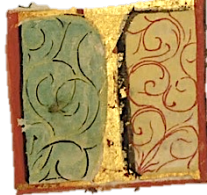

<sup>142</sup>**C**h ermanen dich herre aller der wisen götlichen gedenken so du ie gedächte in menschlicher nature aller der süssen lebenden worten so du ie gerettost aller der min(n) [234]richen kreftigen wercken so du ie gewürcktest und bitten dich das du mir vergebist alle die sūntlichen gedenkwort und werch **D**ie ich ie getett wider dinen götlichen willen und alle die gūten werck die ich ie versumde un(d) gib mir wise götliche gedenke süssi lebendi wort und min(n)riche kreftige werck die dir loblich sind und genām und nütze allen den die du mainist tod und lebend **I**ch ermanen dich der minneclichen andächtigen gebettes so du ie getāt in menschlicher natur und aller der lieplichen naigunge so du dich mit hertzen oder mit lib ie genaigtost zü dinem vatter und dūr alles des gebettes willen so zü dir ie beschach das dinem götlichen hertzen geneme was **S**o bitt ich dich das du mit dem allem sament für mich bittest an der stund so ich númen bitten kan noch mag **I**ch ermanen dich her(r)e [235] aller der begirlichen innren sūnftzen so du ie geliest aller der minnrichen trähen so du ie gewainotest gib mir söllichen iomer und begird nāch dir der du dich nūt versagen mögist **I**ch ermanen dich her(r)e dz dich hungret und tūrst nach menschlicher natur **D**a du spistest alle creatures vernúnfftig und unvernúnfftig liplich und gaistlich und das du den figbom verflūchtest do du nit frucht an im fūnde do dich hungrete **U**nd bitten dich min herre das du minen hunger erfüllist mit der genuchtsami diner grundlosen gūti nu und an minem end **U**nd verflūch mich nūt darumb das du frucht an mir nie fundt nach dinem willen **I**ch ermanen dich her(r)e dines frostes und dines nacktümes das du die nottürft diner natur nie gewund **I**ch ermanen dich herre diner ar[236]bait und diner müdi und diner

<sup>142</sup> Siebenzeilige I-Feldinitiale mit Blattgold und Rankenwerk.

ellenden witswaifigen wegen aller diner füs stapffen aller der ellenden herbergen so du ie gewunde in menschlicher natur **U**nd bitt dich das du min laiter sigist die ellenden und unerkanen weg die sol ich gon nach disem leben und mich herbergist in diner grundlosen erbärmd so ich nüt me herberg sol han in disem ellend **I**ch ermanen dich her(re) das du woltest getöft werden von grundloser demüt das du das wasser hailgotist das es úns möchte wäschen von allen únsren sünden **I**ch loben dich ewiger vatter das du dines ewigen wortes verächte Offenlich in miner natur vor allen lúten do du sprächte. hic est filius meus dilectus<sup>143</sup> **U**nd bitt dich min her(r) das du mich wäschist mit dem wasser aines rechten rúwen und in dem gaist diner götlichen gnad[237]en von allem dem mittel das zwüschent dich und mich ie gefiel als luterlich das du dines götlichen adels ewiglich in mir veriehst und das ich den iungsten töff empfahe mit rechter beschaidenhait und andächt **I**ch ermanen dich her(r)e **D**as du giengt in die wüsti und das du vastetest viertzig tag und nacht dár nach hungrete dich und woltest versüchet werden von dem túfel dz du úns an allen dingen gelich wúrdist und das du in úberwundist krefteclich und wislich **U**nd bitten dich das du din arbeit und din strenges leben nemist für alle min versumnus wan es min aigen ist und du sin ze núti bedarft und gib mir dz ich alle anvechtunge und alle mine vigend wislich und krefteclich úberwinde nu und an minem ende **A**lso das ich von in gesichrot werde eweclich **I**ch ermanen dich [238] herre das du anvienge lere und bredigen mit worten und mit werken un(d) das du giengte von ainer statt ze der andren **U**n(d) dick úber nachte festet an dinem gebett aigen hus noch hof du nie gewunde. lieben noch gúten tag du uff erden nie gelebtost und alles din leben was dir ain gegenwirtiger tod wan er dir alle stund gegenwirtig was da von erlachotest du nie in xxxiiij iaren **U**nd bitt dich min gott und min her(r) das du mir ze hilff kumist an der stund uff die din menschaiť vier und drissig iar sorgete und bringe denne dine wirdigen dienst dinem vatter für alles das mir gebristet das ich nüt bin als du es eweclich von mir begert hest **I**ch ermanen dich herre **D**as du din iunger userweltest **V**on aller der welt mit inen ze wonende uff ertrich in menschlicher natur und das [239] sy din gesellen waren in disem ellend und das du erwaltost arme lút an leben und an geschlächte dár um(b) dz nieman verzwiflote **W**an du siehest nüt an die person der lúten allain die hertzen **I**ch ermanen dich her(r)e des minneclichen und lieplichen wandels so du hettest mit inen do du sy so lieplich zúgte als ain getrúwer maister sin lieben iunger **D**er núwen fróden und gnaden so sy empfiengen von diner minneclichen by wonung und von dinem honig fliessenden worten und sy volgeten dir nâch an armút an verschmächte **D**er welte an aller volkomenhait un(d) bitte dich min herre **D**as du alles das an mir

---

<sup>143</sup> Vgl. Mt 3, 17.

volbringist Da zú du mich ewe(n)clich erwelt hast und das ich dir nach folgende werd an rechter volkomenhait als verre als es muglich ist und das du mich an minem end frölich empfahest in die wun(n)e[240]klichen gesellschaft diner iungern das ich mich mitt úch werd fröwen Ich ermanen dich herre das du mit dinen iungern wúrd geladen zú ainer wirtschaft und din liebi müter was och da und es gebrast wines do sprach din müter zú dir sy enhaind nút wins Do spricht Du ernstlich zú ir frowe was gat dich und mich das an Doch zwang dich din gúti das du wasser ze win verwandlotest O min herre und min gott Ich lúdi dich gern zú minem hertzen und han dich dick geladen so gebrast mir gnaden und andacht und begird und bitte dich ewige minne das du din gúti an mir erist und der bette diner lieben müter das du alle min liplichen begirde verwandlist in götliche begirde alle min liplichen minne in götlich minne und mich dir mählegist mit solcher minne und trúwe un(d) liebi Das mich leben und tod nút von dir [241] bringen mögi Ich ermanen dich her(re) der minn das du die súnder so recht gütlich empfiengt und die du mit gnaden nút zú dir ziehen mochtest die zugt du aber mit dinem götlichen wandel und (st und trunkt mit inen So dir das dine vigend verkerten So spricht du die gesunden bedörfent artzates nút. Sunder die siechen Min her(r) und min gott Ich danken dir von grunde mines hertzen und miner sel das du mir so lange und so gedultelich hest gebaitet in minen manigvaltigen sünden Und naige mich hie zú dinen götlichen füssen die dá nie nieman versmachen noch vertribent mit allem dem die do applas ir sünden ie begerten Und bitten dich das du mich ansehist mit den ogen diner grundlosen erbärmd Als du zacheum ansächt Do du spricht zachee gang balde her ab ich müß [242] noch hütte in dinem hus essen und als du ansächt matheu(m) an dem zolle zú dem du spricht volg mir nach Und als du ansächt die frowen die ir Ee hat gebrochen zú der du spricht. frowe hât dich nieman verdamnot so wil ich och dich nút verdamnen. gange und súnd nút me Und als du ansächt die súnderinen die zú dinen füssen lag und si wüsth mit iren trehnen und truknete mit irem hare zú der spricht du gang in dem frid dir sind din súnd vergen Also haisse och mich hütte in den frid gon von allem dem dz mich diner süssem haimliche geir(r)en mag und mache mich von ainem súnder zú ainem volkommen minner Ich ermanen dich her(r)e aller der zaichen so du ie getait in menschlicher natur an allem dem die es an dich begerten und hilff an dich süchen und von dir bedürffen mit den alle(n) [243] sament so rüffe ich zú dir mit also grössem globen als ob ich dich liplich sehen möchte als sy dich sahen und sunderlich rüffe ich zú dir mit dem blinden der do sprach Miserere mei fili david Das spricht Davides sun Erbarm dich über

mich<sup>144</sup> **O** we won ich bin blind worden von den sünden nackent unnd bloß aller tugenden und güter werken **U**nd bitten dich das du mich erlúchtist das ich dich und mich luterlich werde erkennen und minnen **I**ch rüff zû dir min herre mit dem ussetzigen die da sprachen. ihesu gebieter erbarm dich úber úns und mit dem der da sprach wiltu so macht du mich rainen **U**nd bitten dich das du die hand diner götlichen erbärmd streckist úber mich un(d) mich rainist von aller der unluterkait die du an mir erkennest **I**ch rüff och zû dir mit allem dem die da besessen waren mit den bösen gaisten und sunderlich mit der haidmen die dich batt [244] für ir dochter und du ir so herteklich antwürtest und spricht frowe das brot der kinden sol man nit geben den hunden **D**o sprach sy herre das waiß ich wol **D**och werdent die hündli dik gespiset mit den brösem lin **D**ie da vallent von den tischen der herren **A**lso bitt ich dich min herre das du mich tailhaft machist aller der minne und andächt so alle minnende hertzen zû dir haínd und das du mir also grössen geloben gebist der wir erwerbe alles das ich nottürftig bin ze sel und ze lib **I**ch ermanen dich herre das du die tötten erkicktest leblich un(d) gaistlich und bitt dich min her(r)e dz du mich erkickist<sup>145</sup> von allen den tötlichen gebresten so an mich ie gevielen **I**ch ermanen dich herre das du die siechen gesunt machotest von aller hand siechtagen won es gieng kraft von dir die sy hailte mit ainem worte **U**nd bitten dich das du mir allen gebresten ab nemist nach allem dem als du erkennest das ich sin nottürft[245]tig bin **I**ch ermanen dich her(r) das du woltest verwandelt werden uff dem berg vor dinen iungern und woltest inen erzögen das bild der künfftigen gúnlich und ward da gehöret des vatters stim(m)e. Hic es filius meus **D**as ist. dis ist min sun<sup>146</sup> und empfiengen die iunger so vil trostes un(d) süssikait da von das sy ir selbs und aller dingen vergässen **U**nd bitt dich min herr das du mich hútt verwandlist in dich also das ich empfinde der süssikait dines trostes und das ich alles des vergesse das uff ertrich ist und das ich nieman bekennen werd denn ihesum allain **I**ch ermanen dich herre des volkommen güten bildes so du úns vor trúgt und alles des mi(n)neclichen wandels so du hettest mit den lúten und **D**as din leben was ain spiegel aller volkomenhait allen den die tugent und gnad von dir nem(m)en wolten **D**u wárt och ain fal un(d) ain [246] flüch allen den die din götlich leben inen selben ze ainer ergrung nemen wolten won du hattest in allem dinem leben spotter und verkerer diner Worten und werken und bitten dich dz du mir vergebist wa ich

<sup>144</sup> Vgl. Lc 18, 39: Et qui praeibant, increpabant eum ut taceret. Ipse vero multo magis clamabat: Fili David, miserere mei; auch: Miserere mei fili David quid vis faciam tibi domine ut videam. Dom. Quinquagesimae, Matins, Antiphon, Cantus ID 003776.

<sup>145</sup> Ergänzung am linken Seitenrand.

<sup>146</sup> Vgl. Mt 3, 17: Et ecce vox de caelis dicens: Hic est Filius meus dilectus, in quo mihi complacui.

ie kainen menschen schaden getet an sel oder an lib mit worten oder mit werken mit bösem bild mit minem krancken leben **U**nd gib mir ain also tugenthaftig leben das aller menglich da von gebessret muge werden **I**ch ermanen dich her(r)e alles des lidens so du ie erlitte in menschlicher natur inwendig oder uswendig haimlich oder offentlich oder **D**ürch dich ie erlitten ward **U**nd bitt dich das du mit dem verainist alles das liden das ich ie gelaid oder iemer geliden sol und mache es mit den liden ihú xpī und aller diner fründen dir selben loblich und genem und allen denen nütze die ich maine tod und lebent **I**ch erma[247]nen **D**ich her(r)e aller **D**er tieffen wunden so du ie empfienget liblich oder gaistlich haimlich oder offentlich oder durch dich ie empfangen ward und bitten dich das du in die versenkist alle min wunden liblich unnd gaistlich und sy hailist und wider bildest in dinen minnrichen wunde(n) und dir si loblich machist **I**ch ermanen dich herre alles des blütes so du ie verguste oder durch dich vergossen oder verswainet ward und iemer verswaint sol werden un(d) bitten dich das du mit dem verainist und verclarificierist alle din natur und das blüt das in mir ie verschwaint ward und iemer verswaint sol werden das mache dir selbe loblich **I**ch ermanen dich her(r)e diner demüt diner gedult diner armüt diner gehorsami aller diner götlichen und natúrlichen tugenden [248] **U**nd bitte dich das du mir alle min untugent benemist und erfülle mich mit allen tugenden **I**ch ermane(n) dich her(re) diner unmässigen und aller grösten minne uss der da gewürket ward alles din leben und darnach geschétzet und geneme was der hailigen drivaltikait und nütze menschlichem künne und bitten dich das du alles min lebe(n) verainist mit der minne din selbes und es da inne geneme und loblich machist dir selben und nütze alle(n) den die ich maine tod und leben

**An dem zinstag So bette dis**

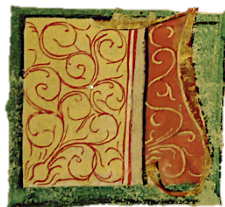

<sup>147</sup>ch ermane(n) dich herre der sorgen und der angsten und forchten so du hattest gegen der marter won dir din vigent lagote(n)t nacht und tag haimlich und offen[249]lich und begerten alle tag dines todes und enterotent dich mit worten un(d) mit wercken und verkerten dir alles das du tät und gestiessen dir nie ab untz das sy dich ertötten ain schantlichen todes **I**ch ermanen dich her(r)e das sy din spottoten und dich schulden und das sy sprachen zü dir du wärist besessen **U**nd wärist ain fräß und ain trincker **U**nd ain fründ der offnen sündler und was ir grim(m)ekait also größ über dich das sy dich wolten han verstainot **I**ch ermanen dich herre das sy dich uss der statt triben und täten in ächte das nie man mit dir getorste reden noch dich nieman

<sup>147</sup> Siebenzeilige Feldinitiale mit Rankenwerk.

getorste gehalten noch kain gút getün **U**nd ermanen dich her(r)e alles des  
 ellendes so du hettest die xiiij tag vor dinem liden **U**nd bitt dich das du mir ze  
 hilff komist an der stund so allen hertzen ver[250]borgen was ich lide und mir  
 alle creaaturen nüt mögent ze helffe komen denn du allain **I**ch ermanen dich  
 herre das du so demüteclich widerkertest in die statt von der du in so grösser  
 uren vertriben wärd rite(n)t uff ainem eselin und das du mitt grössen fröden  
 und gesang empfangen wurd und so ellentelich gelassen won do du allen tag  
 gebredigotest noch do müstest du für die stat us gon in sant marien magdalenen  
 hus das sy dir ze essent gäb **M**in herr und min gott gib mir dz ich dich mit  
 minnen und begird empfahe und dich in götlicher wirdekait vor ogen habe das  
 du bi mir belibist **I**ch ermanen dich her(r) das du zwen tag lertost und  
 bredigotest und menig größ zaichen tät **D**arumb die bischoff angsthafft würden  
 und besamnotent ainen rät und sprachen was [251] sollen wir tün wan(n) diser  
 mensch tüt grössi zaichen lassen wir inn leben so werden sy alle an in geloben  
**D**o wis sagete der bischoff kayphas un(d) sprach ir enwissent was ir  
 gedenkent üch ist wäger das ain mensch sterbe denn das alle die welt verderbe  
 und von dem tag gedächten sy das sy dich wölten ertöden **I**ch ermane(n) dich  
 herre **D**as du ewiger schatz den nieman vergelten mag so ungetrúwlich  
 verköfftet wurd von dinem iúnger den du uss aller der welt erwelt hattest der  
 verkofte dich von rechter gittikait und bitte dich das du mir gebist das ich  
 niemer vergesse des túren schatzes da mit du mich geköfftet hast und **V**ergib  
 mir das ich dick um(b) so clainen und so swachen schatz gelassen han **I**ch  
 ermanen dich here der minne in der du die dinen minnetost und noch minnest  
 untz uff das ende und das erzögtest inen mitt [252] dem iungsten nacht mal das  
 du mit inen äst do du von diser welt schaiden woltest **U**nd bitt dich her(r)e das  
 du von diner gúti noch hútt solich wirtschafft habist in minem hertzen das du  
 mich mit der minne verainist mit der du die dinen min(n)est als ich mit der  
 minne veraint was eb ich mensch würde in der zit **I**ch ermanen dich her(r)e der  
 begirde so du hettest nach únsrem hail do du sprácht ich han mit begirden  
 begert das ich dis ostren mit üch esse ee ich werde liden **M**in gott und min  
 her(r) gib mir söliche begirde die mich din wirdig mache und din begirde  
 ewe(n)clich an mir volbringe **I**ch ermanen dich her(r) der grundlose(n) demüt  
 das du den adel diner götlichen natur din zarten mägtlichen menschait so  
 lieblich naigtost ze wäschende **D**ie fússe dines ver[253]rätters und der andren  
 diner iungern und bitte dich min herre das du min begirde wäschist von allem  
 dem das diner gegenwürtikait nüt gezemet und mich zu dir beraitist nach dinem  
 lob und nach miner nottürft **I**ch ermanen dich herre der min(n)eclichen letzi so  
 du úns liest in disem ellend do du das brot brächt und gesegnotest und du dich  
 selber núste und dinen iungern gäbt und spráchte nement hin und essend dis ist  
 min fronlichnam **D**arnach nemst du den kelch und danketest dinem vatter und

gäbt inen dich selb und sprächt nement und trinckent dis ist der kelch des núwen urkúndes mines blütes das für úch sol vergossen werden **D**is sond ir tún in miner gehúgde recht als ob du sprächist min lieben iúnger **I**ch han úch erwelt und han úch min trúwe dick erzöget **N**un ist die zit ko[254]men das ich von miner liblichen gegenwirtikait nút me getröstet sollent werden **D**a von lán ich úch mich selbe(n) nu hie ze ainer spise und nach úch aller der welt das ir miner trúwe niemer me vergessin und söllent es tún in miner gehúgde **W**án es ist ain ende und ain zil aller der trúwe und der liebi so ich úch ie erzogte du wistest wol das wir din als recht nottürftig wären **U**nd das din götlich hertz nút so innerlich noch so ze grund gezwingen möchte zü allem dem das das wir wolten und nottürftig wärin als die menschlich nature **D**ie das sol wol verdienet hât und so pinlich erarnet hatte un(d) bitt dich durch der unmessigen minne willen das du mir vergebist ob ich dich ie empfienge in ainem solichen lebende in dem ich dich nút sollte empfangen han **U**nd gib mir das ich dich hütt und alle zit hinnan [255] für empfahe nach dinem allerliebsten willen und hóchsten lob **U**nd in der mainung **U**nd minne als du dich úns gegeben häst und sunderlich an der stunde mines todes das ich denn dis minnecliches opfer empfahe mit beschaidenhait begird und andächt also das du denne min laiter wellist sin die unerkan(n)ten weg die ich denn sol gon än alles vegfür **I**ch ermanen dich herre das du den geminten sant iohannsen liest rúwen uff dinem götlichen hertzen und liest in schöpfen von diner götlichen und menschlichen natur die wishait und **D**ie kunst mit der e(e)r sit die cristenhait erlúchtet hett un(d) bitt dich das du mich naigist uff din minnriches hertz un(d) mich erlúchtist mit diner erkantnus die mir rúwe und frid geb in allen sachen **I**ch ermanen dich herre [256] **D**er süssen minneclichen rede so du mit inen tät die wyßhait mit der du sy erfultest die rainikait so sy von dinen Worten empfiengen des lieplich verhaissens und gelúpte so du inen tät von dinem vatter des trostes mit dem du sy trotest des hailigen frides und segens den du inen gäbt **I**ch ermanen dich herre des lieplichen gebettes so du tät für dine iunger und das du sy so getrúwlich dinem vatter bevälchte und alle die **D**urch sy glöbig söllent werden untz an das end der welt und sunderlich so sprächt du vatter miner ich bitten dich das sy ains werdin als ich und du ains sind **I**ch bitt dich min her(r) das du min getrúwer fürsprech sigist um(b) alles das ich nottürftig bin ze sel und ze lib und die ainikait der du mir begertest **E**e das ich mensch wúrd die volbringe an mir nach [257] dinem götlichen willen **I**ch ermanen dich herre der ellenden fússtapffen so du willenclichen giengt mit dinen iungern ze dem berg oliveti mit grösser sorg und trurikait das du sprächt min sel ist betrüpt untz in den tod und bitten dich das du mir ze hilff komist an der stund so min sel trurig ist untz in den tod **U**nd bitten dich das du min laiter sigist **D**ie unerkannten weg die ich denne gon sol **I**ch ermanen dich her(r)e das du die verre giengt von dinen



iungern uff den berg und naigtest dich demüteclich uff das ertrich und hübt din ogen und din hend uff in den himel und spricht vatter mag es sin so überheb mich diser marter doch werd din will und nit der min **Min** herr gib mir ain also minneclich gebett zü dir in allem minem liden das du mich von **Diner** [258] güti erhören wellist und bitt für mich mit dinem andächtigen gebette an der stund so ich nit me betten mag **Ich** ermanen dich herre der gehorsami mit der du dich erbutt in den kampff mit únsren vigenden und des starken strites so do was zwüschent der gothait und der menschait und bitt dich das du für mich trettist in dem kampff mit allen minen vigenden und in allem minem leben **Und** sunderlich an der stund mines todes und hilff mir sy überwinden das sy mir nüt geschaden mügent **Ich** ermanen dich her(r)e das dir in der stund gegenwürtig was alles das liden **Das** du liden soltest nüt als ainem menschen das daran gedenket me als du es yetz empfindest und lidtest an dinem lib und was dir och als gegenwürtig alle die sünd die von an genge der welt ie geschach un(d) [259] yemer me geschehen sond die unere der gothait schatte den selen und das alles nach schulden und nach rechte wider legen soltest die gegenwürtikait machte diner nature als pinlichen schmerzen **Das** alle din ädren ridenten und dine gelider zittroten zü ainem ietlichen ätemzuge wan dir gebrast aller diner menschlichen kreften das **Du** wärd als ain mensch der hin zúhet und würd hin flüssend von vlütigem schwaiss als unmässeclich das din gewand nüt me enthalten mochte und das es ran uff das ertrich **Min** herre und min gott in dinem zittrenden krancken gelidern in din ridenden adren empfilh ich dir min iungsten not das du den(n)en alle trurekait und vorchte von mir nemist und gib mir ain frölich sicher end **Und** gib mir ainen blütstropffen dines min(n)richen swaisses [260] uff die wage das er widerwege minen manigvaltigen gebresten **Ich** ermanen dich herre und schöpffer aller creaturen ainiger trost aller hertzen **Das** du in tötlicher not von diner creatur getróstest woltest werden das du erzögtist menschlich kranckhait un(d) bitt dich **Das** du mich tröstist mit dir selben in allem minem liden und sunderlich an minem ende und mich sicher machist des ewigen lebens **Und** ermanen dich herre **Das** du herab giengt zü dinen iungern und fund sy schläffent von trurikait **Un(d)** du wacktest sannt petern und spricht petre schlauffest du. möchtist du ain stund nüt mit mir gewachen **Du** hattest mir doch gelobet **Du** wöltest in den kerker mit mir gon und och in den tod **O** min herr und min gott wie han [261] ich dir so dicke wol gelobet und so úbel gelaistet **Das** vergib mir durch din güti und gib mir das ich dir alle min gelúpte also laiste das och du alle din gelúpte volbringist eweclich **Ich** ermanen dich herre des schrecken so din zarte menschliche natur empfiengt **Do** du sácht die schar diner tötlichen vigende gegen dir komen mitt kolben mit stecken mit swerten mit spiessen mit facklen und mit aller hand wäffen. als du ain morder wärist **Und** das du erkantest die grim(m)ekait iren bittren herren un(d) bitten

dich min herre **Das** du mich behüttist an der stunde mines todes vor der erschrockenlichen an gesicht aller miner vigenden und erfrowe mich mit der angesicht din und diner lieben müter und aller engel und hailigen **Ich** ermanen dich herr das du dinen [262] tötlichen vigenden engegen giengt die dich so vigentlich süchten und mit ainem worte do würffte du sy alle nider uff das ertrich als toten und bitten dich min herre das **Du** mir gütlich engegen gangist in allem minem liden so mich iemer an gat es si gaistlich oder liplich **Und** mit der krafft dines ewigen wortes alle min vigent nider schlahist **Das** sy mir nüt geschaden mögent **Ich** ermanen dich herre der grundlosen demüt das du nüt verschmachtest ze küssend den mund der dich in den tod hette geben und ze um(b) vahend das hertze das dich verriet und bitten **Dich** das du mir noch hütt gebist **Den** kuss dines götlichen frides **Und** ainen gantzen sün alles des ich ie getett wider dinen willen und mich um(b) vahist und trukist in dine götlichen haimlichi **Ich** ermanen dich [263] herre das du dine iunger so lieplich schirmtest **Do** du spricht fūchent ir mich so lāssent diese gān und du beschirmtest **Dine** schāfli und gābt dich selben für si in den tod und bitt dich das du mich ze allen ziten habist in dinem götlichen schirm vor allem dem das mir schade mug sin an sel oder an lib **Ich** ermanen dich herre **Des** anvalen des das din tötlichen vigende an dich vielen mit allen iren wāffen und der herten banden mit dem sy dich die ewigen frighait bunden das dir das blūt zū den negel us sprang und bitte dich ewige minne das du mich ledigest **Und** lösist von allen banden mit dem ich gebunden bin und setze mich in die fryhait diner götlichen ard da in ainem ogenblicke alle verlorne zit widerbrācht wirt **Ich** ermanen [264] dich herre das dich alle dine fründ liessen und von dir fluhen und das du allain stünt under allen dinen vigenden und bitt dich min her(r) **Das** du mich nit lāssist an der stund so mich alles das lat das under dir ist und mir alle creatures nit ze helfe mögent komen den(n) du allaine

#### An der Mittwochen so sprich

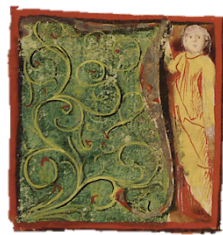

<sup>148</sup>ch ermanen dich herre des uslöffens un(d) des geschrayes so sy über dich täten und das nieman so böse was er handlote dich nach alles sines hertzen mūt willen und das der aller best was der dich aller úblost handlote. ainer zoch dich by den hār das die löcke in den gassen lagen **Der** ander zoh dir den bart us. sy zugen dich bȳ [265] dem hobtloch des rokes und schlügen dich uff din hertz das du hinder dich<sup>149</sup> vielt **So** schlüge dich der

<sup>148</sup> Achtzeilige historisierte Initiale mit weiblicher Figur und Rankenwerk.

<sup>149</sup> Nachfolgend steht in der Handschrift *uff din hertz*, unterpungiert und mit rot durchgestrichen.

ander uff dinen ruggen das du vor in nider vielt un(d) taten dir also not mit  
 schleglen und mit stossende wär es das sy dich hettin gelassen **Du** wärist dick  
 under in nider gevallen und das blüt schos dir dick ze mund und ze nasen us  
**Ich** ermanen dich herre **Das** sy dich also zugen den berg ab durch das tail das  
 du ainen füss tritt uf das ertrich nie getät untz in den hof anne des bischoffs  
 und manen dich herre **Der** rechnung so annas von dir haben wolt do er dich  
 frägte von dinen iungern un(d) von diner lere und do du im des gütlich  
 antwürtest do gab dir der knecht ainen baggen schlag das **Du** uff das ertrich  
 möchtist sin gevallen gnad erbarmhertzi[266]ger gott hilff mir ze gnadiger  
 rechnung an der stund so min übel und min güt sol gerichtet werden nach diner  
 erbärmd und nit nach minen wercken **Ich** ermanen dich her(r)e das dich annas  
 gebunden sandte zü kayphas der dines todes ie und ie so begirig was das es  
 falsche gezügnuse über dich ewige wärhait brachte. und bitt dich min herre das  
 du min gezüg sýst an der stunde mines todes **Das** du für mich gebützet und  
 gebessret hest nach schulden und nach rechte alles das ich ie getet wider dinen  
 götlichen willen **Ich** ermanen dich her(r) das kayphas sprach **Ich** beswer dich  
 by dem lebendigen gott das du úns sagist ob du sýst xpūs des lebendigen gottes  
 sun **Do** spricht di gütlich zü im sag ich úch so gelobent ir mir nüt. fräg ich úch  
 so antwürtent ir mir nüt **Da** von werde(n)t [267] ir sehen des menschen kind  
 sitzen zu der rechten hand des vatters und komen in den wolken des hymels do  
 zerzarte der bischof sin gewand von obnen untz nidnen us und sprach haínd ir  
 gehöret die scheltwort wes dunket úch **Do** schruwen sy alle mit gemainer  
 sti(m)me und sprachent er ist schuldig des todes und so sy als vil hilffe hatten  
 von dem bischoff do waren sy von hertzen fro und schlügent dich uff dinen  
 nack und sprachen rät wer hett dich geschlagen. **Ich** ermanen dich min her(r)  
 und min gott das die her(r)en giengen schläffen und nam dich do das gemain  
 volck und ernúwroten **Do** alle dine marter mit slegen mit stössen mit runende  
 mit mürmlen mit verspúwen und verbundent **Dir** din minneclichen ogen  
 dārum(b) won sy dir kain laid mochten getún [268] so sy din minnecliches  
 antlút ansahen und taten dir aller der hand marter an so ire giftete hertzen  
 erdencken konden alle die nacht untz an den tag **Das** du zü ainem gúten  
 menschen gesprochen hest das du din liden untz an den iungsten tag niemer  
 geoffnen wilt das du in der nacht lidte **Und** bitten dich min herr das du  
 milteclich mit mir sigist in allem dem liden so mich iemer an gāt un(d) gib mir  
 din liden in min hertz mit emsiger betrachtung und getrúwer mitlidung das ich  
 din niemer vergesse **Ich** ermanen dich herre der bitterkait so din menschliche  
 natur empfieng do du hortest das din **Sant peter Verlogete** zü drin malen und  
 du in so gütlich ansächt da mit er ermant ward diner worten und gewan rúwen  
 und wainot bitterlich. **Min** her(r) un(d) [269] min gott sich mich an mit den  
 ögen diner erbärmd das ich ermant werde mines gebresten und dz ich din so

dicke verlognet han und gib mir gewären rúwen und bitter trähen die dir genem sygint **I**ch ermanen dich her(r)e **D**o sy dich alle die nacht hetten gehandelt nach alles irs hertzen willen **D**o fürten sy dich erst ze prim zit für den rechten richter und du stúnt vor pylato als lang ze gerichte **D**as dir aller diner kreften gebrast **W**on du stünd von prim undtz ze tertz zit do wárt du och än das müd von der bittren marter so sy dir an hetten geton in der nacht **D**o sy aller menschlicher erbärmd an dir vergessen hetten und das du also gedulteclich schwigte das sich pylatus selb wunderte **U**nd bitten dich erbarmhertziger gott das du mir helffist **D**as ich frölich vor dir ze gerichte [270] werde ston unschuldig und ledig aller miner sünden **I**ch ermanen dich herre das dich pylatus durch ainer süne willen sante zü herodes won in hette enrüchet wie er din wári überworden. und das dich herodes gütlich empfienge won er hatt din lange begert und frage dich vil dinges aber du gäbt im kain antwürt **I**ch ermanen dich her(r)e der verdruckunge diner götlichen magenkraft **D**as du kain zaichen woltest tün vor inen und aller diner götlichen wishait das du ain wort mit in nit woltest reden das er dich achteti in sinen hertzen für ainen toren und bitt dich min her(re) das du mir krafft und wyßhait gebist zü allem dem das zü miner ewigen sälikait gehört **I**ch ermanen dich her(r)e das dich herodes verschmächte mit allem sinem her(re) und hieß dich us triben als ainen [271] dürfftigen und ab ziehen und ersúchen als ainen dieb und an legen als ainen toren mit ainem wýssen gewand und sante dich wider zü pylato **O**we wie würt du so úbel gehandelt geröffet gestössen und geschlagen **W**on sy fürten dich als ungestümeclich wa du hin giengt da spúrte man das blüt **O**we wie würt du so unwirdeclich empfangen do du wárt die edel gabe die der vatter in so grosser minn und liebi úns hat gesendet **W**on dir ward ze botten brot geben der bitter tod **I**ch ermanen dich her(r) aller der füs stapffen so du ie gegiengt von ainem richter zü dem andren von ainer gassen in die andren. **U**nd alles des spottes und des itwises so du under wegen litte **U**nd der gedult so du hettest in allem dinem liden das ain úbel wort für dinen mund nie kam und bitten dich **D**as du mir [272] gebist gedult in allem dem dz mich an gät. und ain volkomen leben mit allen tugenden und daran stäte ze belibende untz an minen tod **I**ch ermanen dich her(r)e das dich pylatus gab in den gewalt diner vigenden und das dich die nackent us zugent das ain faden an dir nit belaib **A**ch und du da zierest himel und erd und alle creaturen **U**nd bitt dich das du minen naktu(m) und die armút dines unmessigen gebresten tekist under dinen wirdigen dienst von dinem vatter un(d) vor allem himelschen he(e)r un(d) vor allen vigenden das ich ir spott nit enwerde **I**ch ermanen dich herre das sy dich bunden an ain sul die was also groß das sy kain man mochte umb klefteren also gar fast **D**as du aller diner gelidern ungewaltig würt und die band waren also scharpff wă sý [273] hin giengen da würt du also snattrecht und also vol wunden als du mit ainem

messer verseret wärist und bitt dich das du mich bindist in die adren **D**iner  
 grundlosen erbärd das mich weder lebent noch tot nit von dir bringen möcht  
 Ich ermanen dich her(r)e das du also grim(m)eclich geschlagen würt dz din  
 snewyse hut brach und das sich das flaisch loste von dem gebain das din flaisch  
 zermület ward und din gebain zermürdet won wa die knöpff der gaislen hin  
 giengen da zukten sy dir das flaisch un(d) die hut von dem gebain und da die  
 hut nit brach **D**a was sy aber schwartz und totblütig **O**we wie das blüt viel von  
 den adren und floß über dinen zarten lib **I**ch ermanen dich her(r) der ernúwring  
 dines bittren smertzen das sy dich so dicke schlügen in die frischen [274]  
 wunden das aller din lib erzitrote von ainem ieglichen schlag **U**nd ermanen  
 dich her(r) alles des wesen und des schmerzen so du ie empfiengt **V**on den  
 schlegen und des zitrendes und des schrecken der dir gieng durch lib und durch  
 hertz und durch alle dine adren won sy erzuckten **D**ie schlege von iren  
 gri(m)men hertzen das in iecklicher mit ainem schlag gern ertödet hette da von  
 giengen dir die schleg durch din hut und durch din flaisch un(d) durch din  
 audren untz an din gebain **I**ch ermanen dich herre das sy dich also lang  
 schlügen in die frischen wunden das von der schaitelen untz an die versinen nit  
 als vil gantz belaib das man ainer nadlen spitz getupffen möcht **M**in her(r) und  
 min gott des ermanen ich dich un(d) naige mich in die tieffen wunden **U**nd bitt  
 dich das du mich in den [275] wunden hailist von allen den wunden und masen  
 so an mich ie gevielen und verwunde min hertz mit diner götlichen minne und  
 gib mir dinen verwunten lib uff die wage an der stunde mines todes das er  
 wider wege minen unmessigen gebresten und birg mich in die blütigen wunden  
 vor allem dem das mir schädlich möge sin an sel und an lib **I**ch ermanen dich  
 her(r) des min(n)richen hertze blütes so du da verguste von allen dinen wunden  
 des also vil was das es allenthalben um(b) dich swebte das man die füssmal da  
 inne sah **O**we wie da die adren in ain ander wütenten und wie die wunden uff  
 geswullen von den audren des uswallenden blütes und bitt dich min herre **D**as  
 du mich wäschist in dinem minnrichen blüte und mich also luter machist das  
 du mögist sprechen. **T**ota [276] pulchra es amica mea **D**u bist mit enander  
 schön min aller gemin(n)test fründin<sup>150</sup> **I**ch ermanen dich her(r) aller der  
 flecken und der masen der wunden und der tod blüten so du ie empfiengt an  
 der sul und alles des zitrendes und des smertzen und der grössen krankchait die  
 du hettest do du von der sul wurd genomen und an gelait mit dinem gewand  
**U**nd bitten dich das du mich hailist mit dem ser und dem we dz du durch mich  
 erlitten hast und claide dich mit allen tugenden **I**ch ermanen dich herre das sy  
 dich fürten in das richthus da alle dine vigent zemen komen und zugen dir din

<sup>150</sup> Vgl. Ct 4, 7; auch als Antiphon im Commune Virginum und anderswo (bspw. Cantus-ID 005162).

gewand ab und laiten dir ain pfellerin gewand nit von eren sunder von spott an.  
**E**s was och nit ain anlegen mer ain intrucken in alle dine wunden und ain  
 ernúwren alles dines smertzen pinliche(n) [277] und bitt dich min her(r) das du  
 mich an legist mit den pfeller diner götlichen minne und ernúwer an mir din  
 kúnglich bild **U**nd setze mich in die ersten unschuld als ver(r) als es muglich  
 ist in diser zit dz du mich bekennist und dinen aller liebsten **I**ch ermanen dich  
 her(r) dz sy ain túrnin krone flächten von den aller spitzigosten dornen die  
 truckten sy dir mit scheften in din minneclich hopt untz uff das dünne fel des  
 hirnīs das du in din minneclichs hopt empfiengt tusent tötlicher wunden **I**ch  
 ermanen dich des wees des schmerzten der aschelli und wüsti aller diner sinnen  
 und bitt dich min her(re) das du min sinne verwundist mit diner götlichen minn  
 und mache min sinne wüsti alles des **D**z mich din geirren mag. und gib mir ain  
 beschaiden vernúnfftig end mag [278] es din götlicher wille iemer sin **I**ch  
 ermanen dich herre das sy dir din schönen wun(n)eclichen ogen verbunden das  
 man doch kainem böswicht tüt ee er zü dem tod vertaillet wirt und gaben dir  
 ain ror in din hand für ain zepter und zukten dir denn das úbellich **U**ss der hand  
 und flügen dirs uff din minneclich hopt un(d) uff die túrnin kronen die dir gieng  
 untz uff dz túnne fel des hirnīs das es dike da von erschellet ward **U**nd bitten  
 dich dz du mich ansehist mit den ogen diner grundlosen erbärmd und mir  
 vergebist alle die súnlichen gesichten **D**ie ich wider dinen götlichen willen ie  
 getett und gib mir dz ich dich in allem minem leben also an sehe das ich dich  
 eweclich werde niessen mit dinen aller liepste(n) fründen **I**ch ermanen dich  
 her(r)e das sy dir spuwten under din min(n)e[279]clich anlút und under din  
 ogen das dir die spaichel úber din anlút ran das du kum den átem gezúgt der  
 unflát ran dir in din minneclichen mund das du mochtist ersticket sin **O**  
 minneclicher herre ihū xpē wie würt du entschöpfet von den spaichelen  
 begossen mit blút zerswullen von schlegen schwartz von tod búlen das du wol  
 mochtest sprechen ich bin worden als ain wúrm un(d) nit als ain mensch won  
 es kond nieman bekennen ob du aines menschen antlit ie gewúnd **I**ch bitt dich  
 minneclicher her(r) das du das wunkliches bild miner sel zierist un(d)  
 widerbringist das du enkain ungleichait an ir sehist also dz du dir selben  
 eweclich wol gefallist in mir **I**ch ermanen dich her(r)e das sy für dich knúweten  
 in spottes wis und sprachen bis gegrússet [280] ain kúng der iuden da von  
 bugent sich alle knú für dich. himelsch und irdensch und helsch won du dem  
 vatter gehorsam bist gesin untz in den tod des crútzes **M**in her(r) gib mir das  
 ich dich in allem minem leben also ere und lobe das ich hie an vahe das ich  
 eweclich triben sol und das ich dir ioch widerlege etwas die unere die ich dir  
 erbotten han von minem krancken leben **I**ch ermanen dich her(r)e das dich  
 pylatus hiess herus füren für diner vigent ogen úb sy noch do gesattet möchtin  
 werden von diner marter und ermanen dich her(r)e des pinlichen ellenden

usganges so du täte gekrönet mit dornen und an gelait mit dem pfellerin gewande genaiget gegen **D**em ertrich von slegen und stößen zerswullen von wainen dürgossen mit blüt. und do pylatus sprach zü inen **S**ehent disen mensche(n) [281] **D**o sahen sy dich an mit grim(m)en ogen und rûften úber dich mit herter stim(m)e **T**ü hin tû hin **C**rútzge in er ist schuldig des todes. und verlognoten din zü ainem kung **M**in her(r) und min gott des ermanen ich dich von allem minem hertzen und bitt dich das du mir zehilff komist an der stund so ich für brächt wird diner götliche(n) magenkrafft und du úber mich richten solt nach schulden un(d) nâch recht so gedenke das du menschlich natur hest an dich genomen und für mich hest gebüßet un(d) gebessret **U**nd sich mich den(n) an mit den ogen diner erbärmd un(d) rüff mit allem himelschen he(e)r zü dinem vatter und opffer im din unschuldig liden für mich und gib mir als starcken globen **D**as ich din veriehe mit hertzen und mit munde das ich alle min [282] vigende da mit überwinde und mit dir veraint werdi in zit und in ewikait **I**ch ermanen dich her(r)e das dich pylatus gab in die hende diner vigenden und in iren gewalt das sy allen iren willen an dir erfultin nach der schuld aines schamlichen todes und das ain böswicht ward gelassen für dich den zarten ihesum **U**nd ermanen dich herre des erschrecken do din menschliche natur empfieng da die úrtail des todes úber dich ewig leben gegeben ward und ungerechte urtail úber dich ewige gerechtikait. **U**nd bitt dich min herr das du da urtail der minne gebist úber mich und nit die räche diner gerechtikait **S**under nach diner erbärmd so richte mich güter minneclicher ihesus –

**Am dornstag So sprich** [283]

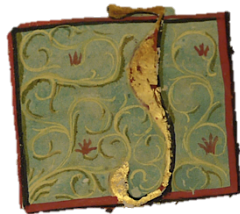

<sup>151</sup>**I**ch ermanen dich her(r)e das sy dir din gewand abzugem in dem sy **D**in sel hetten erfüllet vol spottes und itwis und din hertze erfüllet mit aller lutterkait und das alle din wunden ernúwrot wurden won der rock geklebet un(d) verbachen in dinen wunden das vil blütes von dir kam und laiten dir do din gewand wider an **A**lso bitt ich dich min herre das du mir den alten menschen abziehst mit allen sinen untugenden un(d) mich claidist mit ainem núwen menschen der nach dir gebildet sy **I**ch ermanen dich her(r)e dz nie kain böswicht so bös ward im würde **D**er galge bereit der ward dir grim(m)clich uff dinen [284] frischen verwundeten ruggen geworffen und ermanen dich her(r) dz du so iemerlich darunder gebogen giengt won du enmochtest sin nit getragen **D**o wolten sy din och nit baiten won sy wolten das du bald giengist do enmochtest du es nit getün und also trügt du das crútz allaine untz das du nit mochtest das dir nie mensch mit trúwen ain hand gebot

<sup>151</sup> Siebenzeilige Feldinitiale mit Rankenwerk und Blattgold.



Won got der vatter het uff dich gelait únsere aller úbel da von mochtest wol  
 spreche(n) ich han die trotten allain getretten und es enist nieman mit mir gesin  
 O min her(r) bút mir din hand der götlichen almächtikait in allem dem liden so  
 mich iemer an gát und hilff mir es tragen nach dinem lob und miner aller  
 grösten sálikait Und gib mir dz ich dir gib noch hútt helffe din crútz tragen mit  
 rechter andacht mit [285] getrúwer mitlidung und starker minne und  
 hertzlichem lob also das din liden miner sel wáffen sy nu und an minem end  
 da mit ich alle mine vigent überwinde(n) möge Ich ermanen dich herr des  
 ellenden gezoges so dir nach gieng Dir giengen nach din tötlichen vigent mit  
 grössen fröden mit spottlichen gebärden und flügen dich und stiessen dich  
 ainer hin der ander her und schrúwe(n) über dich als über ainen morder Und  
 die clainen kind würffen horw und stain uff dich. Dir gieng och nâch vil anders  
 volkes Won alles das volk in der stat zogte us das sy gesâhin das wunder das  
 an dir geendet ward Dir giengen och nach zwen schächer die man mit dir  
 verderben wolte das diner uneren dest me wâri Dir gieng och nach din [286]  
 hertz liebi mûter und ander din frúnd mit grösserem hertzlaid die du gütlichen  
 trotest in allen dinen nöten und bitten dich das du mir gebist das ich noch hútt  
 mit dir us gang Von allem dem dz mich din geirren mag und das ich mit dir als  
 frúntlich mit lide und mit allen dinen frúnden Dz och ir mit mir mitliden  
 müssen an der stund so ich sin aller nottúrtigost bin so tröste mich den(n) mit  
 diner minneclichen gegenwúrtikait Ich ermanen dich herre aller der ellenden  
 fússtapffen so du willeclichen gienge an die statt dines todes mit sôlicher  
 bitterkait herten und libes Das du zú ainem ieclichen fús tritt in das ertrich  
 môchtist han getretten und bitt dich min herre das du min laiter sigist die  
 ellenden unerkannten weg [287] die ich gon sol nach disem ellenden leben Ich  
 ermanen dich her(r)e das du kemt an die statt calvarie da tet dir der böse  
 gesmack also we das dir der auttum môcht sin vergangen. won da lagen vil  
 toten und schelmen Min her(r)e erfülle min versúchung un(d) alle mine sinne  
 mit dem grundlosen gút das du bist das mir alles dz ungeschmackhaftig werd  
 dz uff ertrich ist Ich ermanen dich herre der sorgen und der bitterkait so du  
 hettest gegen dem tod do du sâcht das der galg des crútzes dir was vor beraitet  
 und das dz crútz also geordnet was das du din hopt nienan gelainen mochtest  
 und das die witi der löchern dinen adren gezogen müsten werde(n) und das es  
 also smal was Das du zwen füss nebent enander nit mochtest haben. und bitt  
 dich [288] min her(re) das du mir gebist das ich in sôlicher letkait schaide von  
 diser welt Das ich alles des uff ertrich ist nit so vil habe dz ich min hopt  
 genaigen mögi wider dinen willen Ich ermanen dich herre das sy dir aber din  
 gewand abzugun und würffen dich als grim(m)clich das alle dine wunden uff  
 brachen und vil blütes von dir kam und das du pinlich súnfftetetest Ich ermanen  
 dich her(r)e der minne das du dinen lichamen zú fúgtest dem crútz und dinen

ruggen lendest uff das crütz un(d) din armen tertantest über dz crütz **U**nd  
 ermanen dich der swachait und der kranckhait in der du lägt under dinen  
 vigenden do sÿ dich mässen zü dem crütze und dich ainer hin zoh der ander  
 her **U**nd des geschrayes und des zu löffes als vil ward über dich das du [289]  
 min her(r)e möchtist ersticket sin **O**we wie ward do verdrucket aller diner  
 gewalt und vernütet alle dine wysheit geswigen aller diner seligkait über dich  
 vergessen aller erbarmhertzikait **I**ch ermanen dich her(r)e des seres des wees  
 und des smertze(n) und der bitterkait so du hettest do dir ain stumpffer nagel  
 ward durch din rechten hand geslagen durch din hut und din flaisch durch din  
 gebain und din adren **A**ch min herre **D**o viengt du an ze sterben und alle die  
 krefte dines lebens richteten sich gegen dem tod **D**arumb das du mich lebent  
 machist und mich zü dir zugist als du gesprochen hest in ewiger minne han ich  
 dich geminnet. Min<sup>152</sup> her(r) züh mich zü dir und benime mich mir und allen  
 creaturen und veraine mich mit dir **I**ch ermanen dich herre der bitterkait  
 und des smertze(n) so du hettest **D**o die witi des crützes [290] usser dinen ädren  
 gezogen ward und die hut under dinen úchsen brach und sich din flaisch von  
 dem gebain loste und sich die gelider ledgoten und din ädren zersprungen do  
 dir der nagel ward in geslagen **D**o biste du die zene in ain ander von unmessiger  
 bitterkait **M**in her(r) ich naig mich in die tieffen wunden diner hute dines  
 flaisches und dines gebaines dines marges und diner adren **U**nd bitten dich das  
 du mich da inne bergist von allem dem das mir schädlich mug sin ze sel und  
 ze lib nu und an minem end. und hilf mir das ich usser den adren diner  
 grundlosen erbärmd niemer geschlossen werd **I**ch ermanen dich her(r)e der  
 bitterkait so du hettest do dir die füß würden nitsich gezogen und sich da die  
 wunden gentzlich uff täten und dine rippe und dine [291] gelider scharreten  
 das du wärt an ze sehen als ain geschúch du do wärd **D**ie aller schönst forme  
 über aller menschen kind won alle dine gelider würden **D**a usser enander  
 gezogen das man sy möchte gezellet han **I**ch ermanen dich her(r)e der bitterkait  
 und des smertzen so du hettest do dir ain stumpffer nagel ward geslagen für  
 die zwen dick füsse **D**a von ainem ieclichen hamerschlag din hirni erfüllet  
 ward. und das aller din lib erzitrote und din rugge der krachete un(d) das der  
 nagel also groß was das sich die füsse slitzen und das **D**z flaisch und die adren  
 für brachen un(d) das dir der nagel die hut und das flaisch stiess **F**ür das holtz  
 das es ainet halb in stúken möchte sin gefallen und bitt dich min herre dz du  
 mich ergiesist mit dem süs marg diner götlichen natur mit dem du [292] din  
 erhúlt gebain erfüllet hest **U**nd bitt dich das du mir begird und den grund mines  
 hertzen zü dir neglegist das mich weder leben noch tod niemer von dir  
 geschaiden mög **I**ch ermanen dich her(r) der zerzerung aller diner adren von

<sup>152</sup> Großgeschriebener Anfangsbuchstabe, aber nicht rubriziert.

dinem hopt von dinem hertzen von dinen henden von dinen füßen und von  
 allen dinen gelidern Ich ermanen dich her(r)e das du also vast gespannen würd  
 über das crütz Dz du weder hand noch füß gerüren mochtest und das man wol  
 alle dine glider gezellet hetti und was enkain glid es würdi verseret un(d)  
 verwundet untz uff den tod durch minen willen Owe do das süsse flaisch starb  
 und das starck gebain verdarb und die adren ersigen die Da waren dürgossen  
 mit der lutren gothait Owe wie ward do versert die starck winreb die da [293]  
 wüchs usser dem ewigen wesen Därum(b) das ich würde wachsen an gnaden  
 und an tugenden und das ich würde ain geweres schoss als du ain gewere  
 winreb bist Owe wie ist der süß trübel der do wüchs usser der gothait so gar  
 verdrucket und verdorret darumb(b) das ich die süssikait diner gothait möchte  
 niessen nach allem minem willen Ich ermanen dich herre das sy dich uff richten  
 mit dem crütze und ermanen dich des pinlichen uffenthaltes das din frecher  
 starker lib kainen enthalt hatte denn uff dinem zermürdeten flaisch und uff  
 dinen zerrissnen adren Ich beger und vordren von grund mines hertzen das du  
 mir ainen uffenthalt gebist in dinen frischen blütigen wunden in dem die sündler  
 und kranck lüt billich ainen uffenthalt söllent han als lang untz das ich ainen  
 uffenthalt [294] gewunne in der minne in der du mich eweclich geminnet hast  
 Ich ermanen dich herre das die höppter der naglen also groß waren das sy die  
 wunden also fulten das ain blütes tropff nit darus mochte Aber von der swäri  
 dines hailigen libes do begundest du sigen Und taten sich die wunden uff und  
 entflusset sich dine adren und floß das blüt von dir unmesseclich das nüt in  
 dir belaib das du recht ze grund ersigt alles dines blütes won usser iedren adren  
 floß und entsprang ain brunne usser ieclicher wunden ain bach und bitte dich  
 min herre dz du mich wäschist usser dinem hertze blüte von allen den mäsen  
 min(er) sel und mich zierist mit allen tugenden und zaichne mich mit dinen  
 waffen vor allen minen vigenden nu und an minem ende Ich ermanen dich  
 her(r)e der minne das du dem [296] vatter mit ernst bät für dine vigende und  
 bitten dich mit gantzem ernst für alle die mir ie laid getäten mit worten oder  
 mit wercken und bitt dich das du min und ir getrüwer fürsprech sigist an der  
 stund únsers endes als du diner vigent fürsprech wärt an der stunde dines todes  
 Ich ermanen dich herre dz du hiengt an dem crütz nackent und bloß als du an  
 die welt geboren wurd denn das din liebi müter ir tuch ab irem hobt nam und  
 es dir um(b) band Ich ermanen dich herre das du hiengt hoch an dem crütz zü  
 ainem wart spil allen den die uff und ab giengent und zwúschen zwain  
 morden das diner une(e)r dester mer wär und bitt dich min her(r) das du mich  
 zü dir ziehist an Das crütz dines ellenden todes von allen zergenglichen  
 dingen un(d) mich zü fúgist dinen aller liebste(n) [296] fründen in zit und in  
 ewikait Ich ermanen dich her(r)e das du heingt an dem crütz in grösser

bitterkait wan(n) angst un(d) bitterkait des todes rang mit diner Owe<sup>153</sup> wie manig iämerlich gestösse dir an din hertz kam **O** wie meng we und ach din hertz umb vieng und aller der marter und des we die dir giengen **D**ür lib un(d) hertz und dür alle dine gelider un(d) bitt dich **D**as du mir ze hilffe komist an der stund so angst und bitterkait des todes ringet un(d) vichtet mit aller miner natur **I**ch ermanen dich her(r)e des spottes und der itwis so du litte von den **D**ie da für giengen und da um(b) stünden do sy spottlich ire höpter bewegten und dich schulden und sprächen pfuch **D**u do woltest zerstören den tempel gottes und in drin tagen wider machen. **B**ist du gottes [297] sun so löse dich selben **E**r getrúwet an gott der löse in ob er welli er hett die andren behalten und mag sich selben nit behalten. **I**ch ermanen dich herre des spottes so du litte von denen die den tod mit dir litten **W**on die schacher bede ainer spottete din do sprang ain blütes tropff von dinen min(n)eclichen wunden uff das hertz der do zü der rechten siten hieng ze hand do gewan er rúwen **U**nd bat dich diner gnad da empfiengt du in gütlich und vergäbt im alle sine sünde und globtest im das himelsch paradís und bitt dich das du mich spatén rúwer empfahist gütlich zü dinen gnaden und das ich an minem ende die frölichen wort werde hören von dinem mund hútt soltu bi mir sin in dem paradise **I**ch ermanen dich herre des hertze laides so du sächt und erkant[298]est an diner lieben múter die du gäbt dem geminten iunger zü ainer múter und dem iunger ir zü ainem kind **D**o du kum me reden mochtest in der trúw mit der ir do enander empfolhen würden so empfilch ich úch zwain aller liebsten min sel und min lib und sunderlich die stund mines ellenden todes **I**ch ermanen dich her(r)e das alle creatures mit dir littent an der stund dines todes die sun(n) verlor iren schin und ward finster über alles ertrich von **S**exte untz ze non zit und der um(m)hang des tempel spielt enmitten enzway und die staine spielten und die greber taten sich uff **M**in herre gib mir das ich dir also krefteclichen mitlide das och du mir mitlidist an der stund so ich sin aller nottúrtigost bin

An dem fritag So sprich [299]

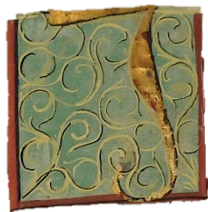

<sup>154</sup>**I**ch ermane(n) dich herre das din liden nit ain valtig was iner tusent valtig und sunderlich so ermanen ich dich des hertzelaides so du sacht und erkantost an diner lieben múter **D**ie da stünd under dem crútz und an irem múterlichen hertzen laid alles das das du litte an dinem libe und das tet dir also we als der tod den du litte **W**on es wär ir tod gesin hettist du sy nit uffenthalten **I**ch ermanen dich herre des liden so du hettest da von das du wol wistest **D**as dich

<sup>153</sup> Großgeschriebener Anfangsbuchstabe, aber nicht rubriziert.

<sup>154</sup> Siebenzeilige Feldinitiale mit Blattgold.

din vigent darumb verdarptent des aller scham(m)lichsten todes das sy din  
 gehúgte toten in allem hertzen das din zü kainem güt niemer me gedächt wurde  
 Min her(r) ich bitt dich das du allen minen gebresten [300] vertilgist und min  
 gedenkist zü allem dem güt das du eweclich von mir begert häst Ich ermanen  
 dich her(r)e das dich alle din fründ liessen das du wol mochtest sprechen ich  
 hab gesehen um(b) mich und es was nieman der mich erkante Ach min her(r)  
 lass mich nit so mich alles das lät das under dir ist Ich ermanen dich herre der  
 bitterkait die du hettest won du wol wistest das din natur was in dem aller  
 besten und volkomnesten Das was gegen xxxiiij iaren das du weder von alter  
 noch von siechtagen noch von kainem gebresten Der natur denn allain von  
 pinlichem liden so müstest du sterben da von tet dir der tod vil wirs denn ainem  
 andern menschen Ich ermanen dich her(r)e das es och was der zit so sich alle  
 berhafter ding richtent gegen dem frölichen blügenden zit des sumers da  
 müste din [301] blügender natur verderben Ich bitt dich min her(re) das du min  
 blüyendi natur verderbist an allen úntugenden und mach mich blüyent und  
 berhafter an allen tugenden Ich ermanen dich her(r)e der bitterkait so du hettest  
 won du wol wistest dz du ain anfang und ain ursach wärt aller der töden so dür  
 dich yemer geschehen solten an so manigem minnsamen menschen von  
 natúrlichen tugenden Do erbarmete es dich und tet dir also we als der tod Min  
 her(r)e sit das ich nu bin ain ursache gesin dines todes so gib mir das ich sin  
 niemer vergesse Ich ermanen dich her(r)e des lidens so du hettest da von won  
 du wol wistest das din tod an so menigem menschen solt verlorn werde(n) und  
 das du úns so pinlich erarnet hest Und das wir din dñrch so klainer dinge willen  
 so wenig würde(n) [302] achten Ich bitte dich min her(r)e das du dinen tod an  
 mir noch an kainem minem fründe niemer læssist verloren werden Ich ermanen  
 dich her(r)e des lidens so du hettest won du bekantost die unmässigen ere die  
 der hailigen drivaltikait ward erbotten an diner menschlichen natur Das es ain  
 wunder was das got nit alle creatures liess ze nùti werden von der unere die im  
 erbotten ward an dir und bitt dich das du mir vergebist alle die unere die ich  
 dir ie erbot mit minem sùntlichen leben Ich ermanen dich her(r)e des lidens so  
 du hettest da von won es was in der zit der aller grösten hohzit das dñrch das  
 iar niemer me lúten in die statt kam und würden die lút niemer frölicher Da  
 wärt du und dine fründ in grössem hertzlaid. da brächt du erwirdiger bischoff  
 das hohzitlich opffer dem [303] götlichen hertzen Ich ermanen dich herre das  
 es was din volk von dem geschlecht du gebören wärt und dem du so vil gütes  
 geton hettest und was die selbe nacht in der du sy usgeführt hettest von egypto  
 Dür das rote me(e)r mit trucknen füssen und ir vigende alle hettest ertrencket  
 in dem me(e)r Du mochtest wol sprechen min volck was han ich dir geton oder  
 waran hab ich dich betrübt des antwürt mir Ich ermanen dich her(r)e das die  
 obren krefte diner sel in ainem also blossen niessen waren Der gothait und in

ainem schowen. als sy hùtt dis tages sind **A**ber die indren krefte des indren und des ussren menschen die wären inen selben gentzlich gelassen uff dem iungsten punckten grundloser bitterkait in trostlosem liden **D**as der marter nie gelich ward da von rüfftest du mitt [304] luter stim(m) min gott min gott wie hāst du mich gelassen **U**nd bitt dich min her(r)e dūrch der minne willen in der du die menschait ihū xpī liest in so grösser bitterkait ān trost das du mich nit lāssist an der stund mines todes und gib mir das ich dich wol konne an ruffen in allem minem liden und sunderlich an der stunde mines todes **I**ch ermanen dich her(r)e des spottes den du litte an der stunde dines todes do sy sprachen wir sond sehen ob helyas kome und in löse von dem crūtz **I**ch ermanen dich herre das du hiengt dry stunden an dem crūtz das du alle zit starklich hin zūgte du hettest och alles din blūt vergossen das du als türre wārt als ain nuss schal du hiengt och an der starcken hitze der sun(n)en ze mītem tag so sy aller haissist ist da von ward dich tūrsten und sprācht **Sicio** **M**ich tūrstet<sup>155</sup> **A**ber [305] dich turste aller maist nach únsERM hail **M**in her(r) gib mir dz ich dir helffe din gebirde volbringen nach dinem aller höchsten lob **I**ch ermanen dich her(r)e das dir ward essich und gallen geben ze trinkent und das das so bitter was diner tūren zungen und das dūrch gieng scharpflich diner ersignen adren **O** wie was do ersigen der lebent brun(n)e **D**as du herre nit so vil hettest alles des so du ie geschūfte als ainen tropffen wassers an der stunde dines todes **M**in herre trencke mich mit dem honig waben diner götlichen sūssikait in allem minem liden und mache mir alles das bitter das du nit enbist und mich diner sūssen haimlichait geirren mag **I**ch ermanen dich her(r) **D**as du sprācht es ist alles volbrācht recht als das bitter tranck wāre ain volbringunge [306] alles dines bittren lidens **M**in her(re) und min gott in die minne in der du sprācht es ist alles volbrācht so ergib ich alles min leben und dz end mines lebens und beger das du in der minne volbringist alles das du eweclich von mir begert hest **I**ch ermanen dich her(r)e das du rüfftest mit starcker stim(m)e und sprācht vatter in din hend bevilch ich minen gaist **D**o bevācht du min sel dem vatter mit diner götlichen sel won din sel was im wol bevolhen. won sy mit im veraint was **I**ch beger das du dir lāssist min sel empfolhe(n) sin in minem hin ziehen **I**ch ermanen dich her(r) das du din sterbende hopt naigtest uff din blütigen brust und das die minne **D**in hertze brach und das du verschiet in disem hailigen minneclichen tod bewinde mich vor dinem zornigen anlūt **I**ch ermanen dich herre [307] dines ellenden todes **D**as nie creatur so arm noch so ellende nie ward sy hetti ainen stain oder ain holtz oder ze dem minsten das ertrich das sy ir hopt uff naigti an der stund ires todes **D**es gebrast dir ain schöpffer himelrich

---

<sup>155</sup> Vgl. Io 19,28: *Postea sciens Jesus quia omnia consummata sunt, ut consummaretur Scriptura, dixit: Sitio.*

und ertrichs das du selbe sprächt die fuchse haind ire löcher und die vogel des himels ire nester **A**ber des menschen kind hat nit das es sin hopt genaigen mögi **M**in herre gib mir das ich mit dir sterbi an allen zergenglichen dingen und das du allain in mir lebst und ich in dir und gib mir ain gút andächtig sicher ende dūr dines hailigen endes willen **I**ch ermanen dich herre der minne die dir din hertz brach und bitt dich min her(r) das ich ee niemer ersterbe **D**en(n) das din min(n)e min hertz brechen werd zū ainem wider gelt **D**es min(n)e bruches dines [308] hertzen und das mit dem bruche mines hertzen werde volbracht alles **D**as du eweclich von mir begert hest als mit dem min(n)e bruche dines hertzen ward volbracht alles das du eweclich begert hettest von menschlicher natur **I**ch ermanen dich herre des frölichen nider ganges so din gnadriche edle sel tet zū der vor helle **U**nd der fröden mit der sy empfangen ward und der clarhait mit der du erlúchtest ir blintheit und mit diner götlichen magen crafft zerbrächt du die band ir gevangnús und fürtest sy mit diner götlichen minne us mit fröden in **D**as erb das du inen gekoft hettest mit dinem bittren tod. un(d) bitt dich min herre das du min sel frölich empfahist so sy von minem lib schaidet und laite in das vätterlich erb **I**ch erma[309]nen dich her(r)e der schaidung so din leben schied von diner wol geordnoten kreftigen natur und din edli sel von dinem minneclichen lib und bitt dich min herre **D**as ich in zit also veraint werd mit dir das ich eweclich von dir niemer geschaiden und das das schaiden daß ich tūn von diser welt sy ain schaiden von allem dem mittel so zwüschent mich und dich ie geviel **I**ch ermanen dich her(r)e des schaidens dz sich die gothait schied von der menschait won du in den drin tagen nit mensch werd und das cristan glob von allen hertzen schied an allain von diner zarten müter und bitt dich das du mir gebist als vesten globen an minem ende das ich alle mine vident überwunde **I**ch ermanen dich her(r)e der min(n)e das dich nit begnügte **D**as du alles din blüt hettest vergossen und das du [310] für mich hettest gestritten untz in den tod du woltest dir och din min(n)rich hertzen lassen uff tūn mit ainem grim(m)en sper **D**arum(b) das du úns gebist alles das du gelaisten möchtist das úns nit gebreste alles **D**as ze trúwen und ze liebi horti **U**nd des ze ainem zaichen do floß her us din minnrich hertze blüt und enwenig wassers **M**in her(r) ich naig mich in din tieffen wunden dines uff getānen verwundeten hertzen un(d) beger das du mich da inne bergist und behútest vor allem dem **D**as mir schädlich sy an sel und an lib nu und an minem ende und **W**äsche mich mit dinem hertze blüt von allen minen sünden und mach mich mit dem lebenden wasser fúcht und fruchtbar an allen tugenden **I**ch naige mich in die tieffen wunden dines minnrichen hertzen und beger von dem grund mines hertzen [311] alles das din götlich hertz eweclich von mir begert het din natúrlich menschlich hertz mir verdienet het und ernet das du das an mir volbringist nach dinem höchsten lob in zit und in ewikait **I**ch bevilch dir in din



minnrich verwundet hertze alle die ich maine tod und lebent un(d) bitt dich das du din götlichen gnad mit in tailist nach dem adel diner götlichen natur und nach dem verdienen diner menschlichen natur und nach dem als ich inen schuldig bin also verwise mich gegen inen **I**ch ermanen dich herre des volkommen opffers so du ewiger bischoff brácht dem götlichen hertzen da du giengt in die hailikait aller hailigen mit dinem aigen blüte und fünd die ewigen erlösung **D**as opfer was volkomen **W**on du mochtest nach nach schulden büssen und bessren nach dem und der ewig vatter büss und bess[312]rung wirdig was won du wárt im glich **E**s was och volkomen won du mit minne und mit lob und mit volkomner danckberkait mochtest gnüg tün und verwesen alle creaturen **E**s was och volkomen won von im volkomenlich mochtest erwerben alles des wir nottürfftig wauren ze sel und ze lib won er dir nit verziehen mag und im alle ding lichte waren ze geben **D**o er dich úns gegeben hatte das liepste und dz beste das er gelaisten mochte. un(d) bitten dich min herre un(d) min gott **D**as du dis wirdig opffer bringist dem götlichen hertzen für mich an der stund mines todes in aller der min(n)e und dem nutze als du es im brechte in der stunde dines todes

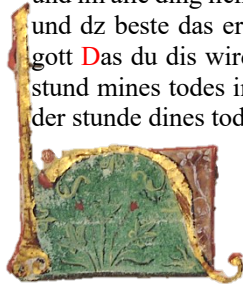

#### An dem Sambstag

<sup>156</sup>**E**rre ich naige mich under die blüt giessenden vethen dines [313] hailigen crützes und won ich alle zit sünden so han ich alle zit ain widerflucht in die herberg des ergrabnen gebains únsers her(r)en ihú xpī un(d) birge mich angsthaftlich in die hohen tieffi diner erbarmhertzigen henden und füssen und dines blüt giessenden hertzen das der lebent fluss dines götlichen hertzen als versogenlich in sich versuge alle die wunden miner sel **D**as der vatter nit úber in richten mögi nach siner gerechtikait me nach der erbarmhertzikait und nach dem enlibent als der sun alle zit vordret von dem vatter sine blütenden wunden **I**ch schlússe minen rúff in den rúff únsers her(r)en ihú xpī **D**o er den vatter an rúfte us tótlicher bebindung hertzen und libes **I**ch rúffe zü dem vatter mit der bittri des usgetruckten blütes mit der süssi des erdoroten marges mit der tieffi [314] **D**es ergrabnen gebaines mit dem ser der zerspannen adren mit der hitz des minnewallenden blütes mit der bittri des ab gezerten flaisches mit der miltekait des us geschlossnen hertzen. mit der demütikait die da luterlich erkante den wider glast götlicher natur mit der sterki un(d) der gehorsami **D**es verainten willen mit der er sich naigte un(d) gab in den tod des crützes mit dem blütigen tode der in sich hat versogen aller creaturen bitterkait mit dem min(n)e turste **D**en der sun hatte in allem disen liden nach dem haile menschlicher natur und beger von dem grund mines

<sup>156</sup> Fünfzeilige Feldinitiale mit Rankenwerk und Blattgold.

hertzen **Das** du durch die dürgrabenen wunden dines gecrútzgoten sunes lássist  
 fliessen die grundlosen erbärnde dines vätterlichen hertzen in min hertze und  
 in min sel **Das** ich gerainget werd von allem dem mittel [315] so zwúschent  
 mich und dich ie geviel als luterlich als nie mittel zwúschen mich und dich  
 wäri gevallen **Ich** ermanen dich her(r)e diner tieffen wunden die dir noch sind  
 unverbunden und sunderlich diner hailigen fünff wunden. und bitt dich min  
 herre **Das** du sy in der minne und der mainung in der du sy behalten hest untz  
 an den iungsten tag das du sy zögest dem vätterlichen hertzen für mich alle die  
 tag mines lebens und sunderlich an der stund mines todes **Ich** ermanen dich  
 her(r)e des min(n)richen hertze blütes so du ie verguste **O** vergöttetes blüt in  
 aller min(n)e vergossen in aller min(n)e empfangen in aller min(n)e würckent  
 in aller min(n)e wider uf<sup>157</sup> getragen in aller minne wider in genomen von der  
 hailigen trivalentikait **Schryge** ainen min(n)e rüff usß allen den wunden mines  
 her(r)en [316] ihesu xpī in das götlich hertz umb alles das ich nottürftig bin ze  
 sel und ze lib nu und an minem end un(d) allem dem das ich maine tod und  
 lebent **Ich** ermanen dich her(r)e dines wirdigen todes und aller der töden so dūr  
 dich ie gelitten ward und ie mer werden sol untz an den iungste(n) tag und bitt  
 dich das du mich an allem dem tödist **Das** in mir lebet wider dinen götlichen  
 willen mag es ioch nit ee sin denn an minem tode und mache mich dir selben  
 allain lebent und kum mir ze hilff an der stunde mines ellenden todes **Ich**  
 ermanen dich herre **Das** du drýe stunden hiengt an dem crútz won es was  
 nieman **Der** sich wölti oder getörsti erbarmen über dinen toten lichamen das er  
 dich loste ab dem crútz **Denn** das du schöpffer und löser menschlicher hilffe  
 warten woltest **Du** mochtest wol spre[317]chen arm ward ich geborn arm han  
 ich gelept aller armest bin ich an minem tod **O**we wie ward do verwandelt die  
 aller schönste varwe und die gezierde diner götlichen ere do du würt verwundet  
 um(b) min unrecht und vertruket umb min sünde **O**we wie ward do der ort stain  
 uff den da ist gebuwen die hailigen trivalentikait geworffen in die gassen **Das** du  
 würt als ain ussetziger mensch. das du selber spricht **O** ir alle die da gond den  
 weg nement war und sehent ob dekain liden sich möge gelichen minem liden  
**Ich** ermanen dich herre das din toter lib ward genomen ab dem crútz und  
 ermanen dich her(r) der ellenden angesicht so din zarti müter und ander dine  
 frúnd an dir sahen **O**we sy sahen die aller schönsten forme über aller menschen  
 kind was ungeschaff[318]en worden von rechter minne **Do** mochten sy wol  
 sprechen **O** du dūrlúchtendes liecht all der welt wie bist du erlöschen **O** du  
 lebender fliesender brun(n)e wie bist du ersigen **O** obreste fröd und süsser trost  
 aller hertzen wie bist du gewigen **O** schöner blüm ob allen blúmen und ob  
 aller gezierde wie bist du verblichen **O** ain ewiges leben un(d) ain leben von

---

<sup>157</sup> Von derselben Hand ist außerhalb des Schriftraumes *wider* ergänzt.

dem alle creaturen lebent. wie bist du tötlich worden von rechter minne **Min** her(r) gib mir das ich dich an sehe mit allen dinen fründen mit also getrüwer mitlidung das och du mitliden mit mir habist an der stunde mines todes **Ich** ermanen dich her(r)e das du begraben würt und rüwetest in dem frid dines vatters und es würden hüter gelait zu dinem grab **Min** herre beschluss mich in den grund dines hertzen und gib mir [319] das ich miner sinnen also hüte dz ich dich niemer verliere **Ich** ermanen dich her(r)e diner frolichen herlichen urstendi mit der din unschuldige menschaiit gezieret ward clärhait schnellikait klainfüglichait und unlidikait won sy ain frölich ende gab aller diner marter **Ich** ermanen dich her(r)e das du diner lieben müter und andren **Dinen** lieben fründen so frölich erschynt und trostest ire trurigen hertzen mit diner frölichen an gesicht un(d) wandlotest mit inen viertzig tag für die viertzig stunden die du in dem grab lägt und mit diner bewerten urstendi hest du uns gesichret das noch ettwen diser arme lib der so vol gebresten ist erston sol **Ich** bitte dich min herre das du mir gebist das ich krefteclich mit dir erstande von allen untugenden **Das** min lib schnell [320] und berait werde zü allen güten werken das ich ietzunt an vahe die urstendi mines tötlichen libes und das du min geselle und min laiter wellist sin von disem ellende in das ewig leben **Ich** ermanen dich herre das du an dem viertzigosten tag dine iunger uff fürtest uff dem berg un(d) spricht zü inen mir ist aller gewalt gegeben in himel und in erden un(d) ich wil mit uch sin untz an das ende der welte und santest sy us bredigen und leren ainen núwen globen **Und** spricht **Do** ich wil uf gan zü minem vatter und zü úwerm vatter un(d) zü minem got und zü úwerm got un(d) fürt uff in den himel das sy es alle sahen in diner aignen krafft und fürtest mit dir den rob den du erlost hettest von der vor helle **Ich** ermanen dich herre **Das** du die tür des himels uff täte die so manig tusent iär allen menschen vor beschloss[321]en was und do mit so unmessiger fröde empfangen würde von dinem vatter und von allem himelschen he(e)r **Ich** ermanen dich her(r)e **Dz** du ze himel bist gefaren dár um(b) dz du dich erzogtist dem vätterlichen antlit für uns won du hest únsere flaisch und únsere blüt erhöhet úber alle chöre **Der** engeln und hest úns die statt vor beraitet und bist únsere fürsprech won den wapen rock diner menschlichen natur erzögest du alle zit **Dem** vatter das er sehe wie verwundet bist an dem strite und er sich erbarmi úber die kranckhait siner erarnoten geswistergit **Min** her(r) ich bitten dich da du mine begirde und min sinne fry machist von alle(n) zergenglichen dingen und sy uff zichist in die höhi **Da** min flaisch und min blüt sitzet zü der rechten hand des vatters und bis min getrüwer fürsprech nu und an minem [322] ende **Ich** ermanen dich her(r)e dz du so krefteclich und so rilich santest die gabe des hailigen gaistes als du dinen iungern gelobet hettest do du spricht ich enlässe uch nit waisen und das er so krefteclich an sich zoch aller ir natúrlichen krefte **Das** sy dár nach kain tod

sünd getün mochten **U**nd bitt dich min her(r) das du mich beraitist und wirdig machist ze empfahren den hailigen gaist **D**er alle min krefte zü dir binde **D**as mich weder leben noch sterben niemer me von dir geschaiden möge **I**ch ermanen dich ewiges güt alles **D**es dienstes so dir din zarti müter und alle hailigen un(d) alle menschen ie getäten **U**nd bitt dich das du mir gebist das ich dich könne gemin(n)en un(d) geloben das ich tailhaftig werd alles des gütēs so ie geschach oder iemer nie geschiecht **O** ewige gütī ich ermanen dich dz [323] du solt komen ze gericht über lebenden und über toten und wirt offen die tagni aller hertzen un(d) wirt ain ietelich mensch empfahren den lon nach sinen werchen **O**we miner armen wercken **I**ch bitten dich min herre das du mich da rich machist von dem schatz und dem hord dines aller getrúwesten dienstes den du dem vatter für mich tete in diner zarten menschaiť **G**edencke das wir nit an dich mögen **U**nd erbarm dich über mich un(d) richte min leben also das ich an minem ende niemer angst noch not gewi(n)ne von dinem strengen gerichte. hilf mir och das ich an dem iungsten tag frölich werde erstön mit lib und mit sel und das ich das süsse wort werd hören von dinem gesegnoten mund. **K**oment ir gesegnoten mines vatters empfhent das rich das úch berait ist von anenge [324] der welte da du wilt sin ain volkomne fröd aller únser arbaitten **A**in lieplich ergetzung mit ainem ogenblick alles das wir durch dinen willen ie erlitten **A**in volkomen volbringung alles des du eweclich von mir begert hest **A**in end un(d) ain zil zü dem wir täglich iagin un(d) ylen da wir mit hertzeclicher fröd werden schniden das wir hie mitt meniger hand trurikait gesäyet haınd. gib mir das ich dich da werde schowen in der aller höchte(n) e(e)r erkennent in der aller tieffesten wärhait **M**innende in der aller inbrunstigosten minne. niessend in der aller grösten süssikait. **L**obend mit allen himelschen gaisten und das ich das ewig leben besitze mit allen dinen userwelten fründen. **L**üge du armer mensch so du komist zü dis[325]er fröd so ist dir alles das vergessen das du ie gelitte **D**ür gottes willen da von bis fro so du arm bist un(d) dir úbel gät und din nieman achtet als ob du nieman habist noch erkennist denn dinen herren ihesú xp̄m allaine der och dūr dinen willen nie lieben tag noch stunde gewan **D**arum(b) das er dir dester minder we täti un(d) du im nit möchtist verweisen weler hand not und arbeit dich ioch an gange won er dir den weg vor gegangen hāt.

**A**llmächtiger got himels un(d) erden als du mit diner götlichen macht all ding geschaffen geordnet und volbrächt hāst und als du alle schöpffunge in diner pfleg in dinen götlichen gnade(n) ist **U**nd mit nam(m)en als die hailigen engel vor dir in gütem fürsätze und sáliger ewiger manunge bestetiget sind also das ir wille allweg [326] dinem willen volget **A**lso bitt ich din vätterlichen gnad das du mit diner götlichen mächtigen volkomenhait mich stercken wöllest und mich also bestätigest das ich zü miner sel trost dinem willen stäteclich volge

O Ewiger schatze götlicher wyshait Tostlicher schin vätterlicher eren  
Almächtiger sun des almächtigen vatters wan(n) in dir als in ainem götlichen  
sarke alle wurde alle ere alle zierde götlicher wyßhait verflossen ist und als der  
allmächtig vatter durch dich und mit dir alle ding geschaffen hat und als alle  
ding offenbar Und luterlich kund sind dinen götlichen ogen und och nütz ist  
das sich über gen muge vor diner götlichen angesicht Also beger ich diner  
gnaden das du min sündiges hertze uss der vin[327]sternus böser gedenck und  
böser fürsatzes also laiten wöllest das ich wirdig werde dines ewigen götlichen  
anlúts eweclich ze schowen Amen

diss ist die ritterschafft unsers herren die sol man an vahren in der karwochen  
uff den balm tag und ist zu samen gelait mit gedencen Worten und wercken  
und lert bestritten die siben tod sünden –

Uff den Sunnentag kam ihesus demütenclich uff ainem esel So sol man sich  
den tag flyssen der tugent der demütikait wider hoffart und sol man sich in dem  
hertzen bedencken un(d) tragen das waffen claid xpī Das ist ain türnin kron  
und sol man zü aubent nider knúwen und bette(n) fúnff Pater noster und fúnf  
Ave maria und sol die hend Crútz wis uff das hopt legen in der krönu(n)g [328]  
ihesus das dir gott all din hoffart des hoptes und gemütes vergeb so hast du  
ritterlich gefochten ainen tag

Uff den Montag. so fliß dich götlicher minne und liebe wider allen nid und hass  
und trag in dine(m) hertzen das Sper da mit ihesus sin hertz uff gestochen ward  
un(d) knúwe nider Und sprich fúnff pater noster und fúnff ave maria mit den  
henden krútz wis an dz hertz gelait der hertzwunden xpī das dir gott vergeb  
den nid un(d) hass dines hertzen so haust du wol gestritten den andern tag

Uff den zinstag. übe dich an der gedult wider allen zorn trag in dinem hertzen  
die gaislen und die rúten ihesus Zü aubent zúh dich us nackent und knúwe  
nider und bett. fúnff pater noster Und fúnff Ave maria mit fúnff [329] schlegen  
uff din ruggen mit ainer rúten der gaislung ihesus das dir gott vergeb allen  
dinen zorn und ungedult<sup>158</sup> so hast du wol gestritten den dritten tag

Uff die Mittwoch. übe dich in miltekait Do ward ihesus verkoft wider alle  
gedultikait und trag in dinem hertzen die klaiden ihesus rock und mantel Spaut  
knúw nider und sprich fúnff pater noster und fúnff ave maria und um(b)vahe  
dich mit baiden armen und henden und sprich hie ist sel und lib und bitt das er  
dir vergeb all din gittikait Din waffen claid sy die claiden Die ihesus us gezogen  
würdent umb drissig pfening so haust du wol gestritten den vierden tag

Uff den dornstag. so flysse dich mügender andächt won xpūs ward uff den tag  
also müd das er hin [330] viel und schwitzet wasser und blüt mit uff satzung

---

<sup>158</sup> In der Handschrift steht *gedult*, links außerhalb des Schriftspiegels ist von derselben  
Hand *un* ergänzt.

der Sacramenten mit fúnff wäschen und mit predigen und betten wider trakait  
trag in dinem hertzen ain krútz mit drin nagel Spaut knúw nider als xpūs uff  
dem öl berg tett. Strek baid hend höch úber das hopt zú samen bett fúnff pater  
noster und fúnff ave maria der müde cristi Das er dir welli vergeben all din  
trakait so hast du wol gestritten den fúnfften tag

Uff den frytag so flysse dich messekait hungers und dürstes das wäffen claid  
ist der schwum(m) mit dem essich und mit bittren galle(n) trag in dinem  
hertzen den schwum(m) mit den bittren gallen ze nacht so stand krútz wis Setz  
ain füß uff den andern und sprich fúnff pater noster und fúnff ave mari(a) dem  
fasten xpī das dir got ver[331]geb all din frässikait so hast du wol gestritten  
den sechsten tag

Uff den Sambstag<sup>159</sup> so fliß dich luterkait wider alle unkúnschait<sup>160</sup> trag in  
dinem hertzen das grab ihesus mit dem wißen flächsin tūch spät leg dich nider  
uff die erde krútz wis Sprich fúnff pater noster und fúnff ave maria der begrept  
xpī und kússe die erd darus du komen bist und wider zú der erde werden müst  
das dir gott vergeb all din unluterkait so hast du wol gestritten den Sibenden  
tag

Uff den ostertag so solt du uff ston mit gottes lob. bis den tag frölich und red  
nit den(n) das dir nottürftig sy. trag in dinem hertzen ainen minneclichen. fan.  
wan(n) du hast ritterlich die siben hopt sünden úberwunden und bist in der  
ritterschafft und bruderschafft ihú xpī Amen [332]

---

<sup>159</sup> Großgeschriebener Anfangsbuchstabe, aber nicht rubriziert.

<sup>160</sup> In der Handschrift steht *kunschait*, links außerhalb des Schriftspiegels ist von derselben Hand *un* ergänzt.

[Miniatur: ‚Einzug in Jerusalem‘]

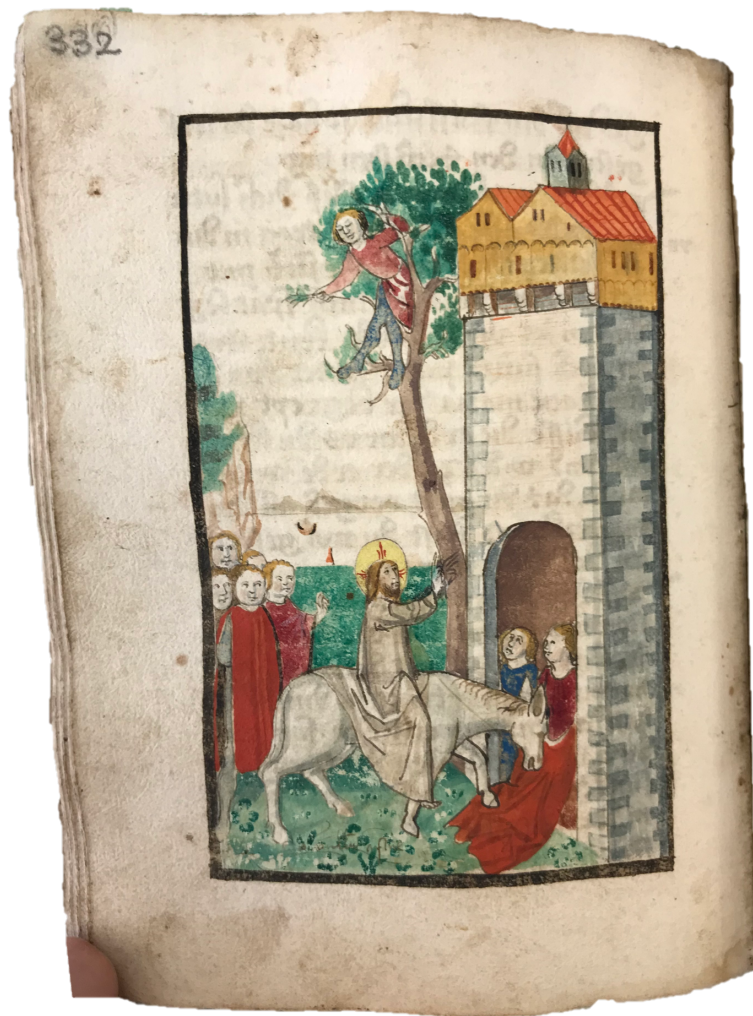



[333] An dem balmstag so sprich diß gebett und vermanug also mit größer begird

O Du kúniglicher her(r) ihesu xpē Min hertz ermanet dich wie du an dem morge(n) frü des hohzitlichen tags sechs tag vor ostren das was an dem balmstag dich beraitest uff die herfart in ze faren mit diner ritterlichen gesellschaft diner armen iunger nit uff schönem wol geziertem pfärit Besunder uff ainer schmähinen Eslingen die och nit din aigen Besunder der gemaind was die dir bereit ward und brächt und du edler her(r) dār uff gesetzt O du kaiserlicher sun des lebenden gottes wie ritest du hütt und bist alle din tag ze füs gegangen Ach du schöner lützelger zierlicher ritter wie ritest du hütt in barfüs barhopt in schwachen claidern arm und blöß an wappen [334] claid und kúnigliche wāt So zúhest du hütt in hin ritent gen der hohen schönen statt iherusalem des versprochen kampfs O in dem du schöner wol gestalter iúngling ritterlich solt fechten und in under gang und verlieru(n)g dins edlen blüyenden fryen lebens den sig in dem strit solt behaben Ach das din wirdige gottförmliche sel und din minnendes hertz wol bekantent darumb do du Edler ritter begundest des strites stat nahen und du sin ansächt Ach do er kam Sich alle din zarte natur und din tugentriches hertz ward bewegt so gruntlichen das din liechten ogen überwielent mitt mengen haissen trähnen vil wainlichen und bitterlich O und mitt offenbaren worten clagtest die blintheit des volks der statt das sy dich iero ewiges hail nit wol[335]tent bekennen und ietz die tag ires friden und wolnust nit sahen Och des hohen gewaltes den du erzogtest in dem die hertzen der menschen würdent enzúnt und bewegt in krafft des hailigen gaistes in sel hertz und gemüt do sy vernäment das du kúniglicher her(r) wärt gen der statt riten Do yltent sy un(d) trugent recht mit grössen scharen uss der statt dir engegen und zugent iro gewand ab und zerspraitent das an den weg under den esel Sy klum(m)ent uff die bom(m) und brächent est und die öl zwyg und iunge ris mit blüsten un(d) die blümen ab dem veld und würffent es dir engegen an den weg da du riten soltest O und mit hohen luten frölichen stim(m)en und mit süssem lobgesang wärent sy dich grützen un(d) dich iren behalter und erlöser nem(m)en [336] und offembarlich verziehen mit dem lobgesang Osanna ain sun davides der da komet in dem nam(m)en des herren Behalt uns in der höhi Eya mit so grössen fröden und hüglichait wärent sy dich himelschen kúnig mit grössen eren und wirdikait empfahen und dich also ritent um(b) geben mit grössen scharen O Du kúniglicher her(r) aller kaiserlichen herschafft min hertz ermanet dich wie so uss fygenlichem hass der grim(m)en hertzen Der fürsten Der gewaltigen des volks du verrüfft würt und verboten under dem volck das dich noch din iunger nieman sölti herbergen spis noch tranck geben und wer das nit hielti den weltint sy werffe(n) uss ir gemeinsami O du lieplicher min herr das du an dem morgen als ain kúnig mit grösser lob

Und eren würt empfangen und [337] an dem aubent des selben tags verrúft als  
 ain benniger verworffner mensch dem alle gemainsami ist verboten **Ach** also  
 wärt du gelassen von allen menschen der gantzen statt das nieman dich getorst  
 herbergen **Eya** du sächt all um(b) dich vil gütlich aber nieman empfieng dich  
**Es** was spät an dem aubent und wärt noch nüchter **Ach** und nieman was da der  
 dich und din iunger spisti und herbergoti **Owe** lebendigi spis also würt du us  
 getrungen und gelassen von allen mensche(n)  
**O** Min vil lieber her(r) und vatter ihú xpē **Durch** dins demütigen in ritens willen  
**So** du tät uff der armen **Eslinen** gen der statt iherusalem **Ach** so kum(m) hütt  
 himelscher kúng der **Eren** ritent uff der eslinen diner lutren zarten menschait  
 mit [338] diner gegenwirtikait gegen der statt miner armen sel **O** die so gar  
 zerstört und verworffen ist von minen vigenden **Ach** das dinem milten hertzen  
 nit unbillichen we tet do du es ansächt in diner vergötteten sel min grössen  
 blintheit **Das** ich den tag mins hailt in dem du mit komen bist mit dinem  
 gnadrichen verdienen dins wirdigen lidens und sterbens **Das** wol mag haissen  
**Das** zit des fridens in dem ich mich in ieclichem ogenblick mit rúw un(d) mit  
 danckberkait möcht verdienen und gnad von diner erbärmd erwerben **Ach** und  
 ich das so torlich und mütwilleclich än all frucht län hin gän und diner grössen  
 minn und trúw so wenig von mir gedancket wirt. **Besunder** grösslich enteret  
**Därum(b)** din getrúwes hertz billich bewegt ward [339] und inneclichen  
 wainetest **Ach** din haissen trähinen sygint min hertes hertz erwaichen um(b)  
 geware rúw umb alle min sünd und das ich dich himelsche(n) kúng hütt und  
 alle zit also begirlich und erwirdenclich empfah in min(er) sel das ich dich  
 himelschen kúng minen zarten gemin(n)ten herren werde loben hie im zit un(d)  
 dört mit fröden iemer eweclichen **Amen** [340]

[Miniatur: ‚Letztes Abendmahl‘]

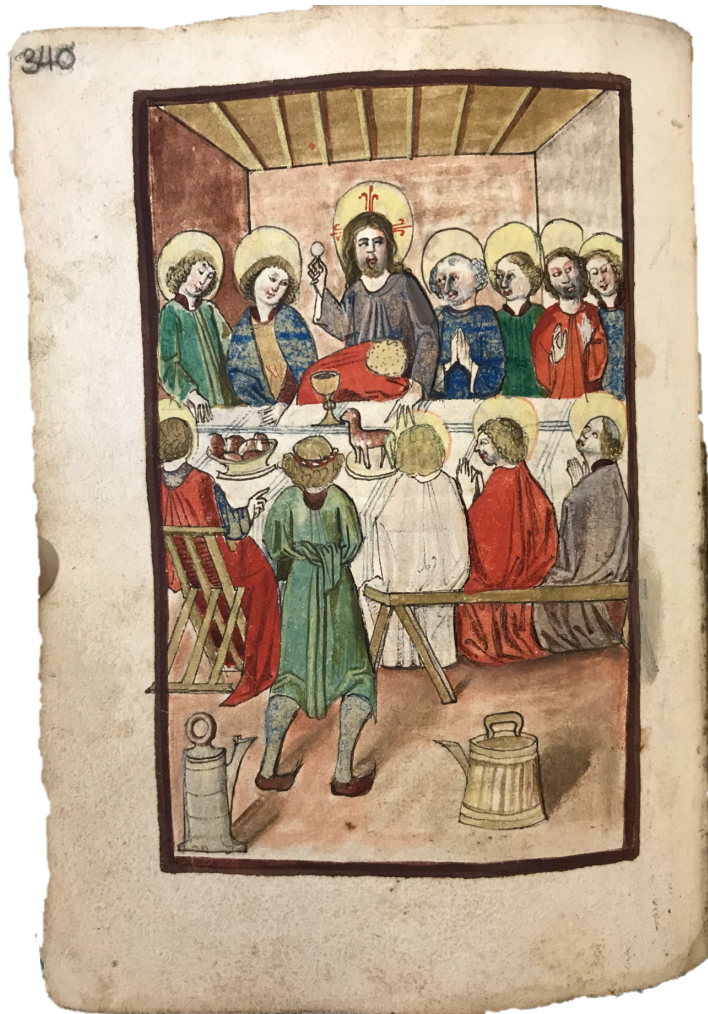

[341] **Diss gebett und vermanung Sprich an dem grössen dornstag begirlichen**  
**I**Ch ermanen dich min aller süssester aller min(n)samester her(r) ihú xpē **D**iner hohen ungemessnen minn und gantzer liebi So<sup>161</sup> du mir und allen menschen erzögen woltest an dem hindresten tag dins ellenden hinschaidens von diner hertz lieben wirdigen müter marien und von allen dinen lieben fründen usser diser zit wider in din vätterliches ewiges besitzen **A**ls du berüfftest und ladetest din lieben iunger und inen alle minn begerendi hertzen diner userwelten zü der hohen wirtschafft des österlichen hohzites als hútt ist in dem du die hohen und túren **C**ostbaren schatz woltest uff entschliessen usser der arch diner vergötteten sel und [342] dins erwirdigen min(n)richen hertzen in dem es verborgen was gelegen vier und drissig iär und(d) nu mit frödricher hitziger begird woltest geben un(d) zü letzi lassen dinen gemin(n)ten **D**is hohen minn du so begirlich erzogtest an dem anvang diser adelichen wirtschafft **D**o du spricht gar frölichen mit begird han ich begert dis ostren mit úch ze essen **E**e ich lid und nach vil süser ler **D**ie du tát uff disem iungsten nachtmal dinen userwelte(n) lieben iungern **D**o nämt du dz brot in din ersamen wirdigen hend und saitest dinem himelschen vatter lob und danck un(d) gesegnotest es und brächt das un(d) gäbt es dinen iungern und spricht **N**em(m)ent un(d) essent won dis ist min licham **D**er für úch sol geben werden **D**is söllent ir tûn [343] in miner angedenknús **A**ber du min lieber her(r) wärt dich selber zögen in dem Sacrament<sup>162</sup> dinen lieben iungern in diner gesegneten hand **O** du hohi edli krafft der minn. min hertz lieber her(r) ihesu xpē und du empfiengt und nust dich selber vor an **S**acramentlich **E**e du dich den iungern gäbist un(d) hettest so grössi fürigi min(n) daz zü das du dich selber uns ze letzi liessist und gäbist sacramentlich **H**etti dich din götliche krafft nit uff enthalten dir müsti din zartes hertz in dinem lib zerspalten sin und bitt dich lieber her(r) das du die fúringen min(n) empfahist für alle die minn und liebi. lob e(e)r und wirdikait **S**o ich und alle menschen und all glöbig selen do sy lebtent dem hailigen **S**acrament soltent han erbotten vor und nách so wir das hailig [344] **S**acrament woltent empfahren oder hettent empfangen un(d) nit getân habent **O**ch lieber her(r) hattest du die aller höchsten beraitschafft darzü won aller tugent volkomenhait warent in dir beschlossen **A**ch darum(b) so bitt ich dich das du din volkommen tugenden und din volkomni beraitschaft hútt uff opffrist dinem himelschen vatter für alle die tugenden und beraitschafft so ich und alle menschen zü dem hailgen Sacrament<sup>163</sup> soltent han gehept und nit getân haind **O**we der bitter tod und die grundlos marter die dir an dinem vätterlichen hertzen lag **D**ie du so

<sup>161</sup> Großgeschriebener Anfangsbuchstabe, aber nicht rubriziert.

<sup>162</sup> Großgeschriebener Anfangsbuchstabe, aber nicht rubriziert.

<sup>163</sup> Großgeschriebener Anfangsbuchstabe, aber nicht rubriziert.

schir und bald vor dir wistest ze liden **D**as du das hütt empfahist für alle die  
betrachtung dins lidens und sterbens so ich und allen menschen und all glöbig  
**D**o sy lep[345]tent in únsren hertzen soltent han getragen vor und nach dem  
hailgen Sacrament<sup>164</sup> ze wirdikait und ze eren und nit getân habent un(d) verlih  
mir das es also sacramentlich. liplich und gaistlich frucht bringi an mir hie in  
disem zit dz ich dört in ewikait von dir niem(er) geschaiden mug werden **A**men  
[346]

---

<sup>164</sup> Großgeschriebener Anfangsbuchstabe, aber nicht rubriziert.

[Miniatur: ‚Gebet am Ölberg‘]

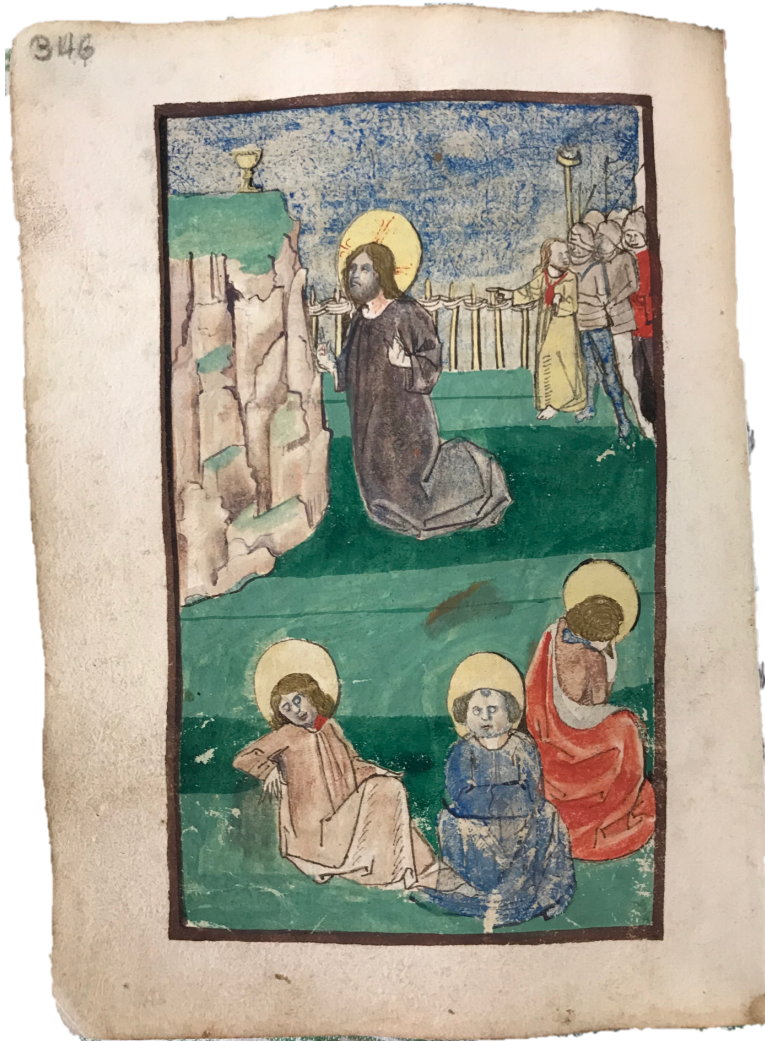



[347] **Ú**ns(er) sprach zü sinen iungern stond uff und gond mit mir und er gieng uss dem hus über ain wasser hies **C**edron da by was ain dorff genant getsameni **D**ie iunger volgetent im und er sprach in diser nacht werdent ir úch alle an mir ergren won ich hie gevangen wird uff den tod úwer sucht haille **D**ie súnd ab wäsch und die súnd besser den menschen mit got und den engeln versünen den himel uff schliesser **U**n(d) der engel zal mit úch erfüllen und er gieng in den garten under den berg oliveti nach siner gewonhait da in iudas wol wiste und hiess die iunger da beliben und sprach sitzent da und bettent untz ich gebette un(d) úns(er) gieng uff den berg un(d) nam mit im **D**rý siner iunger [348] **P**etru(s) **I**acobum und **I**ohannem und sprach zû in bettent und wachent mit mir als lieb fründ **U**nd úns(er) gieng von in wol ainen stain würff und knúwet nider uff sine knie uff die erde(n) und sprach mit cláglicher wainender stim(m)e vatter min sy es muglich **D**as der mensch erlöset werden mug án minen tod so über heb mich des bittren todes **D**och beger ich das din wille dester minder nit für sich gang **Ú**ns(er) stünd uff von sinem gebett und gieng zü den iungern und fand sy schläffen un(d) sprach zü in **A**ch mugent ir nit ain stund gewachen mit mir wachent das ir nit in bekorung un(d) versüchung vallint **E**r gieng aber von in an sin gebett und sprach vatter sol menschlich künne nit erlöset werden ich [349] trinck den(n) den kelch so geschehe **D**in wille und nit der min **S**in angst was also gröss das er in den felsn graiff mit baiden henden **D**er fels entwaich das die vinger beliben in dem felsn gemalet und gezeichnet als ob sy in ain waich wachs getrukt wäri **Ú**ns(er) gieng zü dem dritten mal an sin gebett un(d) bettet die selben wort und red die er vor gebettet hett **A**in engel von himel erschain im un(d) trost und stercki in **E**r lag uff sinem antlút in crútzwis und der blütig schwaiss gieng im durch allen sinen lib und gelider **D**z der rock als nass ward das nit me nessi dar in mocht und ran ain floss uff der erden von im **Ú**ns(er) gieng aber zü sinen iungern und vand sy aber schläffent **D**o iomert es in und sprach [350] **R**úwent won ir mugent es nit lang triben sin ist gnúg stend uff gond mit mir die zit ist nâch won des menschen kind wirt in der iuden hend geben in den tod und er kumpt yetzunt und also für er und die dry iunger den berg ab bis zü den acht iunger **O** lieber her(r) ihú xpē **I**ch dancken dir und loben dich das du so minneclich werk woltest würcken durch min un(d) aller súnder willen und woltest min súnd für mich bessren und mich mit dir und den engeln versünen und der engel zal mit mir erfüllen **U**nd bitt dich das du mir armen súnder die gnade geben wellist **D**as ich dir der gedancken kunne nach dinem aller liebsten willen und nach miner nottürft **I**ch ermanen dich och des trurigen gebetts das [351] du da tät uff dem berg gen dinem vatter **U**nd bitt dich das du mir gebist das ich dir mit andächtigem fruchtberen gebett mins hertzen danck diner grösen truriger gebärd **D**ie du da hettest für mich und alle súnder also das min unfruchtber



gebett frucht bringe gen dir erbarmhertziger got **G**ib mir och volkomen gehorsami diner gebott als du dinem vatter gehorsam bist gewesen und lieber her(r) als du die wil den tod also úbel forchtest was sol mir armen súnder den(n) geschehen **U**nd bitt dich das du mir geben wellist das ich allzit gedenck an minen liblichen un(d) ewigen tod **A**lso das ich dins lidens. schmerzen un(d) tod niemer vergess un(d) bitt dich och lieber her(r) das du mich behúttist vor dem schláff der bekoru(n)g [352] **D**es bösen gaistes das ich icht versúcht werd sunder dem bösen gaist widerstand mit diner hilff **A**ch lieber her(r) wel ain größ angst un(d) not das was do du in den felsen griffst als in ain wachs un(d) bitt dich lieber her(r) **D**as du och in mi(n) hertz griffst mit dinen vingern und dár in din mál setzist das ich dins lidens schmerzen und todes niemer vergesse **O**ch das din blütig swaiss der von dir ran in min hertz fliessi und och abwásche all min súnd und sterke mich och mit den hailigen engeln das ich crafft hab dir ze dienin nach dinem aller liebsten willen

**D**O únsere her(r) zú den acht iungern kam under dem berg in dem garten **D**o hort er das iudas kam mit ainer grössen schar gewäpneter iuden [353] die trügent swert kolben und stangen und ander were un(d) trügen facklen laternen und liechter **I**udas gieng vor der schar und hatt den iuden ain zaichen geben wen er kuste an sinen mund den solten sy haben **Ú**nsere her(r) sprach wen süchent ir **S**y antwürten ihesum nazarenu(m) **Ú**nsere herr sprach **I**ch bin es. **D**o vielen sy all hinder sich von dem kreftigen wort und von dem schin seines antlúts **D**o die iuden zú in selb komen. **D**o frágte sy únsere herr aber wen sy süchten. **S**y rúften vyentlich ihesum nazarenu(m). **Ú**nsere herr antwürt. **I**ch sagt úch doch vor **D**as ich es wäre. **S**id ir mich aber süchent so lássent die gen die by mir sind **D**as die geschriff der propheten erfüllt werde

**Bett**

**O** lieber her(r) ihú xpē wie mócht din hertz so vast erschrek[354]en do du hortest dine vygent komen mit ainem so grössen getämer und bitt dich das ich armer súnder icht erschreckt werd an der zit mins letzten endes von minen vigenden und lieber her(r) gib mir och das ich nit nider valle vor minen vygenden **S**under din götlich angesicht dines antlúts beschowe unerschrokenlich lieber her(r) läß mich och dinr ainen sin die dir von dinem vatter empfolhen sind **S**under in die zal komi der selben und nit verlore(n) werd als der prophet gesproche(n) hât iudas gieng für sich zú unserm her(r)en un(d) um(b) vieng in un(d) kust in an sinen mund un(d) sprach bis gegrússet maister **Ú**nsere her(r) antwurt. frúnd **I**udas **W**är um(b) bist du kum(m)en das du gibest des menschen kind in den tod mit dem kuss und do trugent [355] **D**ie iuden uff únsere her(r)en un(d) vielent im in sin hoptloch in sinen bart und har und schlügent in uff sinen nack **Ú**nsere her(r) sprach ir sind än not komen mit swerte(n) kolben und(d) wáffen als zú ainem schächer und hettint mich doch

täglich funden in dem tempel un(d) synagogen Dār inn ich lert und úwer siechen nert

O lieber her(r) ihú xpē Ich bitt dich das du mich behútist vor der gevangknús Der helle da kain erlösung eweclich erfunden würt und send mir dinen hailigen engel die für mich striti

Die iunger sprachen zü únserm her(r)en sölle wir schlahen. mit dem zuckt sant Peter sin swert us un(d) schlüg des obrosten ewarten knecht ain or ab der hieß malchus Únser her(r)e bewiset sin gedult und demüt [356] und satzt in sin or wider an gesunt und sprach zü sant petern Stoß din swert wider in din schaiden won alle die mit dem schwert vechten die verderbent mit dem swert. globest du nit das ich minen vatter möcht erbitten das er mir zwölff schar der engeln gäbi die für mich strittent es sol also sin. Die iuden wüffent únsern herren nider un(d) stiessent in mit iren knúen an sin brust Sy bunden im sin hend Sy strikten im ain sail um(b) sinen hals Sy spygtent im under sin antlút also das er úber alle sin krafft gan müst von úbrigem ziehen Die iunger fluhent alle von únserm herren ungetrúlich und sahent doch hinder sich wo man iren lieben maister hin fúrt zwen siner iunger giengent im nách der ward ainer gevangen by de(m) [357] geren der schlug das hemd úber das hopt und floh. Ieronimus sagt das es Iacobus wäre Der únßerm herren also gelich wäri

O lieber her(r) ihú xpē als du herteclich gebunde(n) würt also enbind mich von minen sünden und als du uff dinen nack geschlagen würt. also gib mir lieber her(r)e das ich icht von minen vigenden geschlagen werd noch verspottet und als du von dinen iungern verlässen würt also verlásse mich nit min gott und min hail

Sy fúrten únsern her(r)en zü dem ersten in des fúrsten hus annas Er stünd ellentlich und iamerlich gebunden mit zerstrówtem hār und verspytem antlút annas der fúrst fragt in von sinen iungern und von siner lere. Únser herre wolt [358] im nit antwürten von sinen iungern un(d) sprach Ich han offentlich in dem tempel un(d) synagogen gelert was fragest du mich. frage die die von mir habent gehört die werde(n)t dir wol sagen was ich han gelert do gab im des fúrsten knecht ainen grim(m)en schlag an sinen baggen un(d) sprach solt du also dem fúrsten antwürten Únser lieber herr antwürt gütlich un(d) senftmüteclich un(d) sprach han ich úbel gerett das bezúg. han ich aber wol gerett wār um(b) schlechst du mich danne [O]<sup>165</sup> lieber herre ihú xpē Ich bitt dich das du mich armen súnder behútist vor den baggen schlegen und dem versúchen der bösen vygent. sunder das ich gedulteclich lide in diser zit alle räch miner sünde die mir zü vallent in diser zit ob du des verhengest und das ich sicher ston werde vor dir zornigem rich[359]ter an dem iungsten tag so du

---

<sup>165</sup> O-Initiale fehlt.

wirst richten úber lebent un(d) úber toten und das ich danne den helschen dienern nicht ze pinigen gegebene(n) werd

Sant iohanns was erkan(n)t in dem hof anne und er erwarb an der dirnen Die der porten hüt das sy san(n)t petern in liess und die portnerin sprach zu sant petern. bist du nit des menschen iunger den sy gevangen her in gefürt haind Sant peter lognet das er sin iunger wär un(d) gieng in den hof zü de(n) fürston un(d) warmpt sich Do sprach ainer diser was och ainer mit ihesu von nazareth in dem garten Also sprächent die andren alle und bist du von galilea. din spräch meldet dich Sant peter lognet aber das er sin iunger ie wär Dar nach sprach [360] aber ainer was der nef dem sant Peter sin or(r) ab schlüg wärlich ich sah dich in dem garten by ihesu Do schwür sannt peter das er in nit erkanti zúhand krägte der han zü dem andern mal Unser her(r) kert sich umb und sah sant petern an un(d) bewegt in zü rúwen sines verloggens sant peter gedächt an die wort die únsere her(r) vor wider in gesprochen hett Ee das der han zwürent krägt so hast du min dristunt verlognet un(d) er gieng uss dem hof mit betrübtem un(d) trurigem hertzen un(d) wainenden ogen

O lieber her(r)e Wie han ich din och so dick mit minen sünden verlögnet und din creatur lieber gehept den(n) dich. Bitt ich dich lieber her(r) das du mich och hütt mit dinen ogen diner erbarmhertzikait wellist [361] an sehen und mir gebist min sünd ze erkennen und das ich rúw un(d) laid darumb habe und der ze bessrung kume in diser zit und mir die nit gespart werd bis an min letzt end und darumb gepingot werde von den bösen vygenden sunder die in diser zit bewaine und mir die zäher miner fliessenden ogen die abwäschin un(d) gnad vind an diner grundlosen erbarmhertzikait Amen

Darnach fürten sy unsern herren in Cayphas hus des bischoffs und laiten zwen falsch gezúgen úber in das er hetti gesprochen Ich mag den tempel zerstören und in drin tagen wider machen Cayphas sprach wider unsern her(r)en was antwürtest du zü disen dingen die man úber dich bezúgt unser her(r) schwaig und antwürt nitt [362] und do die iuden nit gnüg gezúge(n) mochten haben. Do sprach. Cayphas zü unserm herren Ich beschwer dich bi dem lebenden got das du sagist ob du syest des wären gottes sun. Do antwürt unser her(r) Sag ich das ich sye gotz sun. so globent ir mir das nit do gab im der diener ainen grim(m)en schlag uff sinen nack un(d) sprach solt du dem bischoff also antwürgen Unser herre antwürt und sprach senfteclichen. hab ich úbel gerett das bezúg. hab ich aber recht gerett war um(b) schlechst du mich denne Doch sag ich. für war für war. ir werdent des menschen kind sehen sitzen zü der rechten hand in der craft sines vatters in dem wolken des himels. Cayphas sprach. So bist du doch Der gotz sun. Unser her(r) antwürt. Darumb du häst [363] es gesprochen do zerraiß Cayphas sin gewand und sprach zü dem volck was bedürffen wir me

gezúgnus. nun haind ir selber gehört die scheltwort was dunckt úch das er verdient habi **Do** rüfften sy alle man sol in tötten wan er got gescholten hât

**O** Lieber her(r) ihú xpē **Was** wird ich armer súnder reden und tûn so die zúgen die bösen gaist wider mich werden ston und wâr gezúgnus miner súnd wider mich geben **Bitt** ich dich lieber herre dz den(n)e din unschuld mich entschuldige vor dir de(m) herten strengen richter an dem iungsten tag dines gerichtes und gib mir soliche gedult das ich willecliche(n) lide und gedulteclich trage alle min widerwertikait **Die** du mir zû [364] fügest das ich mine vind och überwinde mit gedultikait un(d) din gnad erwerbe und als du von dinen vyenden geschlage(n) würt herteclich uff dinen nak **Also** gib mir lieber her(r)e **Das** ich nit von minen vygenden geslagen noch ze spott werde das sich min vyent. icht fröwent und mir an gesygen und ob ich dich icht gescholten hetti oder geflüchet hab das du mir das verzihest und kain sölích úrtail über mich gebist als **Cayphas** und die iuden über dich gaben

**DO** Cayphas und das nam(m)haft volck müd waren worden an únserm her(r)en **Do** leiten sy sich an ir ruggen schläffen und emphalhent únsern herren dem aller vygentlichosten volck so iener under in was als riffion und preganten **Das** sy in [365] behúten sölint **Sy** satztent in uff ain stûl und spúwten im under sin antlút **Das** er möcht erstikt sin won im sin hend gebunden waren sy verbunden im sine ogen und gaben im hert baggen und hals schlege **Und** spräche(n)t bist du ain prophet **So** wyssag wer dich geschlagen hab

**Bett**

**O** lieber herre ihú xpē **Ich** bitt dich das du mich mit dinen hailgen engeln behúten wellist das du mir die vigende der bösen gaist kain schmachait erbietten mugen **Sunder** an die statt fûren da ich din götlich antlút in ewiger clarhait gesehe(n) mug in diner mayestat und als du lieber her(r) als gedulteclich der spott und verschmächnus litte von den so aller vygentlichosten scharen **Diner** vygent. bitt ich dich lieber her(r) das du mir geben [366] wellist das ich alle liden verschmächt und spott mit dir trage in minem hertzen gedulteclich und ain mitliden mit dir hab von grund mins hertzen **Amen**

**Do** Cayphas und dz ander na(m)hafft volk gnüg hetten geschlagen do kamen sy zû enander un(d) würden gezât und schickten únsern her(r)en fûr pylatum den richter **Do** er pylatu(m) an sah **Do** erschrack er von grund sines hertzen und gedächt das er von sinem urtail solt liden den tod **Sy** stiessent únsern her(r)en in das richthus und beliben da vor

**O** lieber her(r)e ihú xpē **Ich** bitt dich das du mich och beschirmen wellist und behúten vor der strengen urtail dines gerichtes **Das** ich icht geurtailt werd nach verdienung miner sünde sunder nach erbarmde [367]

**Pylatus** gieng us hin an die strassen und fragt die iuden was der mensch hette getân **Den** sy im geantwürt hettin also gevangen und gebunden ungeurtailt **Sy**

antwortten und sprachen wir haben befunden das er ain úbel tätig –er mensch ist Darum(b) soltu úber in richten Pylatus antwürt in zornlich das sy unsern herren gebunde(n) für in bracht hetten und sprach urtailt ir selber úber in nach úwer gesetzt Do die iuden das horten Sy sprachen úns zimpt nit das wir ieman töttin und gaben dry sachen wider in und sprachen Er hett úns Ee geschwecht un(d) brediget úns ain núw Ee<sup>166</sup> Und hat verboten das man dem kaiser kainen zins geben sölle und er spricht er sy úns kúnig

Bett

O lieber her(r) als du doch wärt aller welte kúnig und dich [368] nit erkanten Also bitt ich dich lieber her(r) das du mir gebist das ich dich völleclich mug erkennen und dinem götlichen willen all zit folge Amen

Pylatus gieng wider in das Richthus und vand unsern herren iomerlichen ston als er in vor gelassen hett und sprach zú im ist das wär das du dich an nimst du sigist der iuden kúnig Unser her(r) antwürt redest du das von dir selb. oder hat dir das ieman von mir gesait Pylatus sprach Ich bin nit ain iud und han das nit erdächt Din geschläch und din bischoff haben dich gen mir verlaidet Unser herr sprach. Min kúngrich ist nit von diser welt. anders min diener vächten wider die die mich in den tod geben än schuld Pylatus sprach Also bist du doch ain kúnig [369] Unser her(re) antwürt Du sprichst es

O lieber her(r) ihú xpē Ich bitt dich das du din diener die engel och all zit für mich lāssist vechten vor den bösen vygenden und gaisten das ich den mugi wider stā nach dinem aller liebsten willen Amen

Pylatus gieng hin us zú den iuden und sprach Ich vind kain schuld an disem menschen des todes Do klagten die iuden und sprachen Er ist ain verkerer und hat das iudisch land verkert von galilea bis her Do pylatus hort galilea nem(m)en und er erkant an siner sprāch dz er von galilea was Do schickt er in zú herodes der zú den ziten zú iherusalem was als ainen úbel tätigen menschen

O lieber herr als du für die richter gefürt bist un(d) doch [370] kain schuld uff dich bringen mochten also bitt ich dich lieber her(r) wen(n) ich für din gericht gefürt werd das och kain schuld uff mich brächt werd

Do herodes unsern herren sah do was er fro won er vil von sinen wundern gehört hatt und hofft er sölt etlich zaichen vor im geton han Do fragt er unsern her(r)en vil frāg Sunderlich ob er der wär durch den sin vatter Die kinder ertödet hett un(d) dem die dry kúnig das opffer brächt hetten und lazaru(m) erkikt von dem tod un(d) batt in das er ain zaichen vor im täti Er wölt in von dem tod erledigen Unser herr schwaig und gab im kain antwürt Do er im nüt antwürten wolt das verschmācht herodes und hiess im ain wyß gewand an legen als ainem toren Und [371] schickt in(n) wider zú pylato

---

<sup>166</sup> Großgeschriebener Anfangsbuchstabe, aber nicht rubriziert.

### Bett

O lieber her(r) ihú xpē Ich bitte dich das du din swigen gen mir mit haltist. sunder sprich mir zü mit diner zungen der erbermd so ich vor dir ston werd vor dinem gericht und lieber her(r) als du verspottet und verschmächt würt vor herodes also bitt ich dich lieber her(r) das du mich behúttist das mich die bösen gaist nit verspottin noch verschmähin so ich für din gericht gefürt werd Sunder nim mich gnädeclich zü dir in din ewiges rich und alle unere und unwirde die dir vor den vier richtern erbotten sind Sy dir ain gantze bessrung für alle min sünd von den ich billich eweclich solt verdamnot sin

DO er wider zü pylato kam mit dem wyssen gewand DO gieng pylatus aber zü den iuden und sprach was wolt [372] ir das ich mit ihesu täti Ich vind kain schuld noch herodes da mit er den tod verschult hab den(n) wolt ir so wil ich in ledig lassen gen disem hohzit DO rúfften sy alle gemain. her(r) lass úns barraban ledig und töd ihesum

### Bett

O lieber her(r)e ihú xpē wie Dz ain gerüff<sup>167</sup> was daß man dich unschuldigen menschen tötten sölt und barraban ledig lassen Der doch ain böser schächer was und den tod verschuldet hât Und man kain schuld uff dich bringen kund. bitt ich dich lieber her(r) das du kain schuld uff mich lăssist bringen da mit ich den ewigen tod mit verschulde Sunder nim(m) mich zü dir in din ewigs rich zü dinen userwelte(n) frúnden das ich mit dem besitze Die ewigen fröd Amen

DO pylatus hort der iuden [373] hertikait do wolt er in bessren Dz sy in des todes úber húbin und(d) liess im sin gewand ab ziehen und an ain sul binden und mit rúttlen und gaislen schlahen also das sin lib aller bitterlich dúrch schlagen ward vornan und kerten in do rúgligen dar und schlügen in das nichts gantz an im belaib von der schaitteln bis an sin solen

### Bett

O lieber her(r) ihú xpē Ich bitt dich das dis din kostber blüt mit ainem emsigen bedencken un(d) ainem getrúwen mit liden rin(n)e und fliess in min hertz und mich wăschí von allen minen sünden Und ermanen dich och des grössen schmerzen den du da empfiengt won dir von ieder wunden ain besunder smertz kam und bitt dich lieber her(r). das du mir gebist die gnad das ich och ain mitliden hab [374] in minem herten des selben dinß bittren smertzen Och bitt ich dich das du mir ab ziehist das claid mines aignen willen un(d) mich bindist an die sul ains hailigen lebens dar an aller min lib nem die rúten aller gaistlichen úbu(n)g das in dinem lob verzert werd Amen

---

<sup>167</sup> Nachfolgend steht in der Handschrift *kam*, unterpungiert und mit rot durchgestrichen.

Sy nämen únsern her(r)en von der sul und täten im ain rot gewand an und satzten in(n) uff ain sail Sy flächten ain kron von mer bintzen un(d) satzten im die uff und truckten im die torn in sin hopt bis an die hirn schalen Sy schlügen dar uff mit irem ror stecken das im das blüt ran über sine wangen und ogen das im gar ain bitter liden was Sy gaben im ain ror in sin hand un(d) knúweten für in und sprachen Bis gegrússet ain [375] kúng der iuden Sy spuwten im under sin ogen und gaben im hert hals schleg und och baggen schleg

O lieber her(r) ihú xpē. Ich bitt dich das dis claid und die turninen kron und das zepter da du in(n)eclichen mit bist verspottet worden mir kom zü ewigem lon das ich da von gewin(n)e ain claid der tugent

Pylatus fúrt únsern her(r)en hin us uff ain höhi under das volk der iuden unnd sprach sehent den menschen den ich gebützt han Sy schrówen alle Crucifige Crucifige Pylatus sprach was sol ich mit ihesu tün Ich vind kain schuld an im und Sprach in zorn nement ir in un(d) urtailent in. die iuden sprachen wir haben ain gesetz nach dem sol er sterben Won er hāt sich gottes sun genempt. und fügt. [376] nit das wir ieman tödin

O lieber her(r)e ihú xpē Ich ermanen dich der ellenden iomerlichen angesicht als du do gezaiget wúrt den iuden un(d) bitt dich das du mir die selben iomerlichen angesicht in min hertz bilden wöllist das ich der kain zit niemer vergesse

DO pylatus das hort do gieng er wider in das richt hus und fúrt unsern her(r)en besitz us und sprach wannen bist du und sag mir die warhait únser her(r) swaig und antwúrt im nit Pylatus sprach wilt du mir nút antwürten waist du nit das ich gewalt über dich han ze crútzge(n) oder von dem tod ze lassin unser her(r) sprach Du hettist kainen gewalt über mich wär er dir nit von obnen herab geben Denn die mich dir gegeben. haben swarlich [377] gesúndet Pylatus sücht alle sach wie er únsern her(r)en liess die iuden rúften all und sprachen zü pylato und lässest du disen menschen so bist du nit des kaisers frúnd won wer sich ainen kúng haisset der widersagt dem kaiser un(d) wir haben och kain andren kúng won den kaiser O lieber her(r)e ihú xpē won ich erkenn dinen gewalt den du über mich armen súnder hāst und das ich als dick strāff verdienen gen dir mit minen manigvaltigen sünden bitt ich dich Das du mich nit strāffen wellist mit dinem gewalt sunder mit diner erbarmhertzikait

Pylatus sücht alle sach wie er únsern her(r)en liessi ledig und gieng zü den iuden und sprach Ich vind kain schuld an ihesu danne nement ir in nach úwer gesetzte die [378] iuden antwürten pylato und sprachen úns ist nit zimlich das wir ieman tödin denne wir haben ain gesetz das úns myses geben hat Darnach solt er sterben un(d) wiss lässest du in das du nit bist des kaisers frúnd won er sich nempt ain kúng der iuden un(d) wir habin kainen andren kúng den(n) ainen kaiser



O lieber her(r) ihú xpē Ich bitt dich das du zü mir mugist sprechen an dem iungsten tag oder gericht das du kain schuld an mir vindist Und lässe mich och nit in die hend der bösen gaist und das ich och kain andern herren noch kúng hab noch kain creatur icht lieber hab denn dich der du lepst mit got dem vatter un(d) mit dem hailigen gaist eweclich Amen

DO pylatus sah das nichts half sunder ie me geschraÿs ward und not under den iuden [379] Do sass er zu gericht und únsere herr stünd ellentelich vor im und stünd och da by sin liebi mûter mit verwuntem hertzen und ander sin frúnd gar klain und etlich die er gesunt hatt gemachet die im gern geholffen hettin Aber die iuden kerten sich nüt dár an Pylatus hus frow sant an das gericht zü pylato und embot im das sy vil in der nacht in dem schläff hett erlitten und das er sich des gerechten menschen nüt underwunde Und als dick únsere herr hort den tod nem(m)en von dem geschray der iuden. als dick gieng im ain sunderlich mordlich smertz un(d) schrek durch sin hertz Aber die verlust der menschen sel durch die er laid die marter tet im vil wirs Do pylatus sah das nüt halff do hiess er im wasser úber sin hend geben und sprach Ich wil [380] unschuldig sin an des gerechten menschen blüt Do rüfften die iuden alle sin blüt gan(n)g úber úns und únsere kind

O lieber her(r) ihú xpē wie gar das dinem hertzen besunder we tett diner lieben mûter smertzen und pin und dich alle dine frúnd liessent die alle sprächent Sy wöltin mit dir. in den tod gon und bitt dich lieber her(r) das du mich nit lássist allain ston vor dinem gericht Sunder das du mir dine engel sendist die mich behüti(n) und bewarint vor den bösen vigende(n)

DO die iuden sahen das pylatus únsere her(r)en als gern genert hett do forchten sy das Pylatus das brecht für den kaiser Och forcht pylato das die iuden dem kaiser clegtin und also gelopten sy pylato gelt das er únsere herren urtailt Do [381] dächt Pylatus die wil sy die sünd úber sich nement und ir erben. so nim ich wol das güt und er sprach Ich gib úrtail úber ihesum von nazareth das ir in an ain krütz kenckin nach dem gesetzt des ersten fürsten Do únsere herr hort das urtail Do gieng ain tod angst durch sin minnecliche natur und alle sin audren und dír sücht im alle sin natur und sin krafft

O lieber her(r) ihú xpē als du klegtost der menschen sel das die verlorn solten werden also bitt ich dich lieber her(r)e durch dine grundlose erbärmd das du din marter tod und pin an mir armen sündere nit laussist verlorn werden Sunder das ich dír der in diser gedencken kúnd da mit ich verdiene das ich von dir niemer geschaiden werd O lieber her(r)e [382] bitt ich dich das du din räch und blüt nit úber moich lássist gon von miner grössen manigvaltigen sünd wegen. sunder din erbärmd setze zwúschen din gericht und gerechtikait und urtail nach gnaden und nit nach gerechtikait Amen

**SY** zugent únsERM her(r)en sin syden gewand ab grim(m)eclich und laitent im sin gewand wider an das man in dester bas erkannti wan er gar ungestalt was und als sy im die kron regten mit dem us ziehen was im ain bitter smertz und liden **Un**(d) sy leiten ain größ swär crútz uff únsERN herren das in bitterlich truckt in sin wunden. sin rock was im vornen lang von dem bucken das er dick dár úber viel So<sup>168</sup> truckten sy in grim(m)clich wider uff **Sy** fúrten och zwen schwächer vor [383] im uß der kainer sin crútz trüg **Im** volget vil volck nach im bekam och ain man engegen **Der** hiess **Simon** den zwungen die iuden **Das** der únsERM her(r)en das crútz müst helffen tragen im giengen och vil frowen nach die sere wainoten. gen den kert sich únsER her(r) und sprach ir tochtren von iherusalem ir söllent mich nit wainen wainent úch selber und úwer kind und es kumpt die zit **Das** ir werdent sprechent sálig ist der lib der nie getrüg. sálig sind die brúst die nie kind gesogten sy werdent wúnschen das die berg uff sy vallint **O** lieber her(r) ihú xpē als du din crútz trügt. also gib mir lieber herr das ich och gedulteclich trage alle widerwártikait und liden die mir zü gevallen mugent das ich da mit ver[384]diene und nider schlahe alle boßhait und anvechtung des libes des flaisches und des bösen gaistes un(d) als der **Symeon** din crútz half tragen **Also** gib mir lieber herre das ich dir din crútz och helff tragen in minem hertzen das ich des und ander dines lidens un(d) smertzen niemer vergesse und als die frowen die dir nach giengen un(d) wainoten dinen tod und marter **Also** gib mir lieber her(r) brun(n)en miner zäher das ich miner súnd beclag rúw und laid darum(b) habe das ich da mit verdien dz ich niemer von dir geschaide(n) werd **Amen**

**Sy** námen das crútz von únsERM her(r)en do sy in hin brächten an die statt der marter **Sy** borotent lócher da durch und borten die ze wit von enander das im sin hend und fússe nit [385] geraichen möchte nach den löchern die wil sass únsER her(r) nider neben dem crútz ellentklich

**O** lieber herre ihú xpē. **Ich** ermanen dich des ellende(n) sitzens by dem crútz do du wol erkantest das die löcher ze wit waren gebort. also das din hailigen füss und hend nit geraichen mochten zü den löchern un(d) bitt dich lieber her(r)e das ich der selben zertrennung in minem hertzen niemer vergess und all zit in minem hertzen trage

**Sy** zugent im sin gewand us und húbent ettlich wunden von núwem an ze blüten **Do** man das gewand als bitterlich uss den wunden zoh und stünd mütterlich nackent erzittrot und bidmet von frost won es kalt was **Sy** wúrfen das crútz uff die erden ett[386]lich frowen brächten únsERM herren gewürtzten win nach des landes sitten **Den** trunken die iuden und gabent únsERM her(r)en win mit mirren und gallen gemischt ze trincken

---

<sup>168</sup> Großgeschriebener Anfangsbuchstabe, aber nicht rubriziert.

O lieber her(r) ihú xpē Ich ermanen dich der scham Do du dines gewandes berobet würt un(d) also nackent und bloß stündt dūr mich armen sūnder un(d) bitt dich lieber her(r) das du mich wellist beclaiden mit dem gewand aller tugent das ich diner verschmācht niemer vergess Un(d) als du mitt bittrem getranck würt getrenkt Also trenck mich lieber her(r)e mit dem bittern tranck miner rūwe(n) und būsse über min manigvaltig sūnd das ich in diser zit also rūw und būsse das ich von dir niemer geschaiden werde

Sy wúrffent unsern her(r)en [387] rúgglichen uff das crútz und zugent im die rechten hand über das loch Und schlügen im ain grössen ruhen nagel durch sin hand sy nāmen ain sail und laiten im dz an sin linggen hand Und zugent die über das loch und schlügen och ain nagel dar durch und laiten im ain sail an sin füsse und zugen im die über das under loch Sy wolte(n) im durch ie den füß ain nagel han geschlagen Do schranckt er sin füß über enander ze bedekin sin scham Do schlügen sy im ain nagel durch bed füß das im die solen stünden an dem crútz Únse liebi frow nam iren schlaýer von irem hopt und warff den dar das sy im sin scham bedacktin

O lieber her(r) ihú xpē Ich ermanen dich och der zertennu(n)g an dem hailigen crútz das Dir nie kain glid belaiß an siner rechten statt [388] sunder über not gezogen waren un(d) bitt dich das ich in bitterkait miner sel mit warer rūw als min verganges úbel und sūnd gantzlich gebessren múg und als dir drý nagel durch hend und durch füß würden geschlagen. also bitt ich dich lieber her(r) das du mir gebist das ich dine hailige marter also betracht mit ainem getrúwen mitliden das die allzit on underlāss in minem hertzen ernúwret werd

HErr ich ermanen dich der hailigen wunden die dir geschlagen ward durch dine rechte hand und bitt dich das du mir vergeben wellist das ich das recht und güt vermācht han das ich schuldig was ze tünd do mich min gewissin angewist und min engel mir von dir in geben und gemant haind

HErr ich ermanen dich der hail[389]gen wunden die dir geschlage(n) ward durch dine lingge hand un(d) bitt dich das du mir vergeben wellist was ich wider dich getān han mit worten werchen und gedencken. mit lāssen das ich tūn solt mit tūn das ich lāssen solt. mit versumnus dines hailigen dienstes mit böser wolnust schlāffen oder wachen wie ich das verschult hab in allem minem leben

HErr ich ermanen dich der hailigen wunden die dir geschlagen ward durch dine rechte füsse und bitt dich das du mir vergeben wellist Das ich wider dich geton han mit hoffart gittikait mit nid und hass mit zorn mit über essen mit trincken mit unkúnschait mit trakait an dinem dienst wie ich das verschult han in allem minem leben es sy dancks oder undancks won mich dz rūwt und mir das laid ist [390]

**HErr** ich ermanen dich der hailgen wunden die dir geschlagen ward in dinen linggen füß und bitt dich **D**as du mir vergeben wellist das ich die sechs werch der erbarmhertzikait an minem eben menschen nit geübt han **D**en hungrigen nit gespiset den türstigen nit getrenket den nackenden nit geclaidet den ellenden nit geherberget den gevangen nit getröst. die siechen nit gesehen noch die toten nit begraben das ich dz wol mocht han geton

**HErr** ich ermanen dich der hailigen wunden die dir gestochen ward durch din hailige siten dar us floß wasser und(d) blüt da mit das hailig **S**acrament bestätet ward und bitt dich das du min hertz och uff tün wellist das ich dinen schmerzen pin und liden **O**ch empfäch un(d) das ich zú kainen [391] ziten des niemer vergesse un(d) spise und trenck mich och mit dem selben hailigen Sacrament<sup>169</sup> vor dem end mines todes das ich des ewigen lebens tailhafftig werde **P**ater n(oster) **A**ve maria. **C**redo in deum **V(ersus)** –

**D**in crütz eren wir dich her(r)e und din erwirdiges liden bedencken wir der du gelitten hast um(b) únsern willen **R(esponsorium)** Erbarm dich über úns<sup>170</sup>  
**H**err erhór min gebett **U**nd min rüffen gang zú dir<sup>171</sup>

**Bett**

**A**llmächtiger ewiger got **I**ch bitt dich durch din hailigen fúnff wunden die du an dem crütz hast erlitten. richt die fúnff mines lebens nach dinem wol gevallen also das ich niemer von disem leben mug geschaiden än wäre rúwe. luter bicht und brun(n)en der zähern und än dinen hailigen fronlichnam dūr dine miltekait **A**men

**D**u miltester herr ihú xpē schrib [392] dine hailigen fúnf wunden in min hertz **D**as ich dar inne lese dinen smertzen und din liebi also das dine gedächtnúß diner hailigen fúnff wunden all zit belibe in der gehaimi mines hertzen und das der smertz dines libes in mir werd erwecket und ernúwret **A**lso das in mir werde entzündet das für der ewigen liebi und all tag werde gemeret als lang bis ich durch dich niemer fúra mug komen zú dir begirlicher schatz erfüllet mit allem güt da aller smertz wirt fliehe(n) und alles truren wirt vertriben **D**a die liebi volkomens zú nemen wirt empfahren un(d) da unussprechenlich fröd än

<sup>169</sup> Großgeschriebener Anfangsbuchstabe, aber nicht rubriziert.

<sup>170</sup> Vgl. *Tuam crucem adoramus, Domine, tuam gloriosam recolimus passionem; miserere nostri, qui passus es pro nobis*. Wird als Antiphon oder Responsorium zu verschiedenen Horen an verschiedenen Festtagen (bspw. Inventio Crucis, Exaltatio Crucis oder Suff. Crucis) gesungen, vgl. Cantus ID 005227 und Cantus ID 007795.

<sup>171</sup> *Domine exaudi orationem meam et clamor meus ad te (per)veniat*. (Ps 101, 2). Wird u.a. als Responsorium oder Responsoriensvers zur Matutin (Cantus ID 006495), als Versikel (Cantus ID 008025), als Antiphon (Cantus ID a02967), als Offertorium zur Messe (Cantus ID g01543) oder als Introitus zur Messe (Cantus ID g03381) an verschiedenen Festtagen des Kirchenjahres (nicht aber am Karfreitag) gesungen.

underläß eweclich wirt sin die selb fröd wellist gerüchen mir armen sündler und allen den die dir dienen gnädeclich geben **Der** du [393] lebst und richsnest mit got in welt zü welt iemer ewenclichen **Amen**

**Sy** hübenť unsern her(r)en uff mit dem crůtz mit laitem und bomen mit grössem geschray im ward manig grůß stoss mit dem uff heben das crůtz vil wider zü der erden das aller sin lib erschellet ward **Sunder** als das crůtz in den stain nider sass **Das** erschutt im alle sine gelider und wunden das sy von núwen an hüben ze blüten und fliessen **Ú**ns her(r) hüb bitterlich an ze wainen und ze betten mit gröszer andächt den psalmen Deus deus respice in me –<sup>172</sup> **Bis** uff den vers In man(us) tuas domine komendo spiritum meu(m)<sup>173</sup> **Die** ritter tailtent sin gewand in vier tail und spilten um(b)<sup>174</sup> ain ungenäten rock **Wem(m)** der allain würd **Won** der [394] nit zertailin was **Pylatus** hiess ain brieff schlagen úbers Crůtz ebraýsch griechs und latinsch Ihesus nazareus rex iudeorum die iuden baten pylatu(s) **Das** er schriben solt **Das** unser her(r)e sprach er wär ain kúng der iuden **Pylatus** sprach das ich geschriben han das ist geschriben **Sy** hanckten zwen schacher zü im ainen an die rechten siten den andern an die linggen syten im zü grössen schanden **Der** zü der linggen siten sprach. bist du gotz sun so hilff dir selb und och úns **Der** zu der rechten siten antwürt fürchst du nit got **Du** bist doch in den selben schulden **Aber** diser mensch tet nie úbel noch sünd wir hangen aber von rechten schulden **Darum(b)** gedenck her(r) min so du kom(m)ist in din rich **Ú**ns her(r) antwürt. hůtt solt du by mir sin in dem paradís [395] **Die** iuden wegten och ire hōpter und schulden in und sprachen pfy dich dorstest dich rúmen **Du** wöltist den tempel zerstören und in drin tagen wider machen **Bist** du gottes sun so gang von dem crůtz her ab so wellin wir globen **Etlich** sprachen er hāt andren lúten geholffen und kan im selb nit gehelffen **Sin** liebi betrúbti müter. **Sant** iohan(n)s. maria magdalena un(d) ir zwo schwōstran un(d) ander sin betrúbten frúnd stúnden. da by dem crůtz mit grosser clag und wainen

**O** lieber her(r) ihú xpē **Ich** ermanen dich der grössen stoss die dir würden von dem uff heben des crůtzes und der bitterlichen not die du litt von dem in setzen des crůtzes in den stam **Das** dir alle din glider und wunden durch gieng und bitt dich das du mir gebist das ich [396] ain mitliden mit dir trage in minem hertzen des selben dines bittren lidens und des niemer vergesse zü kainen ziten und lieber herre als du bitterlich waintest und bedächt mit gröszer andacht also

---

<sup>172</sup> Vgl. Ps 21, 2.

<sup>173</sup> Vgl. Ps 30, 6; Lc 23, 46; in der Tradition das letzte der sieben Worte Christi am Kreuz.

<sup>174</sup> *spilten um(b)* wiederholt sich in der nächsten Zeile und ist mit Bleistift eingeklammert.

bitt ich dich lieber her(r)e **D**z du mir gebist dz ich mine sünd och bewaine rúw und laid darum(b) habe und die besser mit minem gebett dz ich das mit sölicher andacht spreche **D**as es mir frucht bringe gegen dinen götlichen gnaden un(d) als die iuden dein gewand under sich tailten durch ir gitikait. also gib mir lieber **H**er(r) dz ich mine sinne und gedeneck enziehe von diner creatur dises zergengliches lebens un(d) güttes an dinem bittren schmerzen und liden den du durch mich armen sündler gelitten hast **U**nd als pylatus ainen brieff über das crútz liess schriben dir zu schanden also bitt ich [397] dich das du mich wellist behütten vor sünden und vor schanden un(d) mich schriben in das büch des Ewigen<sup>175</sup> lebens **U**nd als der schacher her(r) durch dich manet sin zü gedenecken in dinem rich. also bitt ich dich lieber her(r) das du an mich wellist gedenecken **U**nd mir geben rúw über min sünd und mir helfen in dines vatters rich un(d) als din vygent irú höpter wegten un(d) dich schulden also läß mich lieber her(r) min vÿgent die bösen gaist nit verspotten noch verführen in versuchunge und als din liebi müter. iohannes **M**aria magdalena und ander dine lieben fründ gröss liden und bittern schmerzen hetten Do sy dich also sahen hangen an dem galgen des hailigen crútzes **A**lso bitt ich dich lieber her(r)e das och ich alles din liden mit dir in minem hertze(n) [398] trag und des niemer vergesse Am(en)<sup>176</sup>

**O** lieber her(r) ihú xpē des lebenden gottes sun der du an dem end dines todes an dem hailigen crútz hangent **S**iben wort spricht darum(b) das ich die selben wort all zit in minem hertzen und gemüt hett **B**itt ich dich das du durch die krafft der selben wort mir vergebist und var(e)n wellist lassen alles das ich ie gesündet und begangen han an den siben tod sünden **U**nd och an den sünden die von den siben todsünden kom(m)ent. **D**as ist hoffart zorn nid und hass gitikait unmässikait un(d) unkúnschait

**Dz erst wort**

**H**er(r)e ihú xpē als du spricht vatter vergib den die mich gecrútzget haind. also gib mir dz ich in diner minne und liebe vergebe un(d) varen lässe von grund mins hertzen allen den die mir [399] laid mit Worten oder werchen ie haind geton

**Das ander wort**

**H**erre ihú xpē als du spricht zü dem schächer du wirst hütt mit mir sin in dem paradís **G**ib mir lieber her(r) also ze leben das du mir uff die stund mines todes zü sprechest du wirst hütt by mir sin in dem himel

**Dz dritt**

<sup>175</sup> Großgeschriebener Anfangsbuchstabe, aber nicht rubriziert.

<sup>176</sup> Großgeschriebener Anfangsbuchstabe, aber nicht rubriziert.

**H**Err ihú xpē als du sprächt zü diner werden und lieben müter wib siech und nim(m) war der ist din sun und sprächt zü sannt iohannsen dinem iunger sieh die ist din müter **G**ib von diner gütü mir armen sūnderin das mich wār liebi und minn bringe in die liebi und besunder geheime diner lieben müter und dines lieben iungers

**Das vierd wortt**

**H**Erre ihú xpē **A**ls du sprächt zü dinem himelschen vatter min gott min gott wārum(b) häst du [400] mich verlassen **G**ib mir das ich in aller trübsal angst und not mich zü dir kere und das ich sprech min vatter min her(r) und min gott erbarm dich über mich armen sūnder der mich mit dinem aigne(n) blüt erlöst hat **H**ilff mir und schick und richt min leben nach dinem willen

**Das erst wort v –**

**H**Erre ihú xpē als du sprächt mich tūrst und och getrenkt würt mit essich und gallen der tūrst nit anders was den(n) die in brünstig begird die du hettest nāch dem hail und selde der sāligen selen die diner zükunft in der vor hell wartotent **G**ib mir lieber her(r) ihú xpē das ich all zit ainen tūrst ain begird und liebi hab dich und uss dir der du bist ain brun(n) und ursprung des lebende(n) wassers und des ewigen liechtes

**Das ander wort sechst [401]**

**H**Erre ihú xpē als du sprächt vatter **I**ch empfilch min gaist in din hend **G**ib mir lieb(er) her(r)e ain söllich leben das ich an minem end muge frölich un(d) trostlich zü dir sprechen vatter in din hend empfilch ich min gaist. nim mich gnādeclich uff wan(n) ich hūtt zü dir kum in ain gantzen un(d) vesten getriuwen won ich ietzunt an das end mines todes komen bin

**Das dritt wort vj**

**H**Erre ihú xpē als du och sprächt **E**s ist alles volbracht das ist din arbeit smertz und liden **D**ie du durch unsern willen woltest liden und och das in der **E**e und durch die wissagen von dir geschriben und gesprochen ist **E**s ist alles volbracht **G**ib mir her(r) das ich uff die stund so min sel von minem mund schaid hören werd **D**ie süssen und begirlichen stim(m) **K**um(m) her zü mir [402] min liebi fründin wan(n) ich nun enden wil alle dine arbeit und gebresten

**H**Erre ihú xpē des lebende(n) gotz sun der durch das hail aller der welt an dem hailige(n) crütz hanget **D**iss siben hailigen wort gesprochen hast und mit bittren gallen getrencket würt und do du das alles volbrächtest das die hailigen wissagen von dir vor gesagt haben empfilcht dinen gaist dinem vatter in sin hend **A**lso empfilch ich mich nu und an minem end minen gaist in din vätterlich hend und bitt dich lieber her(r) das du in gnādeclich und in frid uff nemist und in din ewig leben setzist in die **C**hör aller diner erwelten da er sich mit in vor dinem götlichen anblick eweclich werd fröwen **A**men [403]



Es ward ain größ vinsternus über alles ertrich die sunne und mone verluren iren schin von **S**ext zit untz ze non zit **D**as grim(m)e volk lag by dem crütz als ob sy tod wärin **D**ie haidenschen maister sprächen also der gott der natur der lidet ietzunt oder alle ding der welt sol zerstört werden und vil menschen stürbent das ertrich erbidmet die stain spielten sich. **S**under der stam da das crütz in(n)e stünd der um(m)hang des tempels zerraiß sich vil greber täten sich uff und erstünden die tötten der túfel sass uff dz crütz und wartet sins tails

**O** lieber her(r) ihú xpē **I**ch ermanen dich der erschrockenlichen zit do alle creatur ain mitliden hetten mit irem schöpffer bitt ich dich lieber herre das du mir gebist das ich och ain mitliden habe mit dir un(d) dinen creaturen und das ich an dem [404] erschrockenlichen tag icht erschrecken werd mit dem strengen urtail dines gerichtes un(d) von der großen zaichen wegen **D**ie da geschauhent das ich och erstand von minen sünden und nit begraben werd in dem grab der bösen vygende **S**under da von erstand un(d) besitz mit dir die ewigen fröd **A**men

**D**ie sele ihú xpī für von dem lib mit großen fröden un(d) gewalt der gothait in die vorhell zü den altvättern und andern die ain tail by **S**echs tusent iaren **D**är inne waren gewesen un(d) der túfel ward gebunden **D**as er nit also vil gewaltes hât als vor über den menschen im zü schaden die hailigen engeln rúfften zü den túfeln das sy die tür uff tätin dem kúng der eren **S**y erschracken sere und vorchten sy müsten die selen lassen die tür ward uff ge[405]ton der kung der eren gieng darin und die gothait nam dar us adam und **E**vam **I**ohannem baptistam und ander glöbig selan

**O** lieber her(r)e ihú xpē als du den bösen gaist gebunden hâst also bitt ich dich lieber herre das er och kainen gewalt über mich hab zü kainen ziten un(d) mir och nût geschaden müge weder mit worten werchen verklaidu(n)ge oder versüchunge **S**under erlos mich armen súnderin vor der vinsternus der helle also das du die altvätter hast geton und für mich mit dir in din ewiges rich mit den selben sâligen vâttern

**D**O die vinsternus vergieng und das blind volk sah dz liecht komen **D**o gieng Centurius<sup>177</sup> ain ritter zü mit vil andern rittern un(d) lopten gott und sprachen **W**ârlich diser ist des [406] gewâren gottes sun und sy erschracken das sy im als schwâchlich hetten geton und erbotten **D**ie iuden giengen zü pylato und bâten in das er den crützgoten ir bain liesse brechen das sy dester ee stúrbin und von der hohzit wegen dester ee von dem crütz würdin genomen. das gund er in. **D**o giengen die ritter und brâchen den schwâchern ir bain und do sy an únsern her(r)en komen **D**o was er tod

---

<sup>177</sup> Großgeschriebener Anfangsbuchstabe, aber nicht rubriziert.

○ lieber her(r) ihú xpē Ich bitt dich das ich arme sūnderin icht erschreckt werd in der vinsternús der bittren helle und dz mir kain smächait von den bösen vygenden zü gefügt werd Sunder behüt mich vor allem úbel und lieber her(r) als den schächern die bain gebrochen würden. also behüt mich Das kain min gebain noch gelid icht gebrochen werd und an mir nit gebrochen werde mine manig[407]valtigen sünd die ich begangen han

Und do das grim(m) volck sah das unserm her(r)en mund und ogen uff stúnden Do sprach ainer sieh er lebt noch wir sölle im sin syten uff stechen so sehen wir ob er sich reget Do was ain blinder ritter hieß longinus der hiess im ain sper setzen an sin siten und stach in sin siten Da gieng wasser und blüt uß der wunden da von das hailig Sacrament gehailget und gewirdiget ist und das blüt ran an dem sper ab bis an die hand do strach er ungevarlich sin hand über sin ogen und ward gesehen und rüfft mit luter stim(m) ○ we ich han úbel geton und ist mir doch zü grösser hail kom(m)en

○ lieber her(r) ihú xpē. trenck mich och mit dinem hailigen blüt Das uss diner syten floß un(d) wäsch mich mit dem wasser des selben [408] flusses von allen minen sünden un(d) lieber her(r) als din hailiges blüt dem ritter longinus in sin ogen ran also bitt ich dich das du mir mine ögen och gesehen machist das ich sehe min missetät sünd Und rúw und laid darum(b) habe die och besser un(d) bússe nach dinem hailigen willen und miner sel nottürfft Amen

Es kam ain edel man genant ioseph von aramathya un(d) batt pylatu(m) das er im gunde únsen herren ze graben Dz tet pylatus und in wundert das er als schier tod was Und nicodemus halff ioseph und nāmen in von dem crütz Ioseph empfieng in in ain wyß tūch was linin und laiten in an die erden und salbeten im alle sine wunden mit größem flyß und mit betrübtem hertzen clagten sy in in gebrast an dem globen Únse liebe frow sass [409] zü in uff die erden und besah im sin hailigen wunden an dem hertzen An den henden an den füssen über al und hett die iomerlichosten clag wainen und gebärd das sy alles das volck erbarmet das sy sah Sy übergöß sinen lib mit wainenden zehern das ir wassers gebrast un(d) blüt zü iren ogen us gieng

○ Lieber her(r) ihú xpē Ich bitt dich das ich armer sūnder och begraben werde in diner erbarmhertzikait und gesalbet werd mit der hailsamen salben starcker rúw und das mir och an dem hailigen globen niemer gebrest Und lieber her(r) als dich ioseph empfieng von dem hailigen crütz also empfah min arme sūnderi och in din gnad und behüt mich vor allem úbel libs und sel Och bitt ich dich lieber her(r)e das du min ogen och ergiessen wellist [410] mit dem wasser Der trähen also das ich mit diner lieben müter och ain mitliden hab irs bitterlichen lidens irs grössen hertzlaides und diner hailigen wunden niemer vergesse Amen

Sant iohanns sprach zü unser lieben frowen Es wär güt das wir unsern her(r)en begrübin ee die virre an gieng un(d) die hohzit. Unser frow was gehorsam und liess unsern her(r)en zü dem grab tragen Ioseph und nicodemus in das wyß tüch mit gröser andächt und unse liebi frow und ander giengen och mit Und sahen wie man in begrübi Es ward och ain grösser stain über sin grab gelait und als unser her(r) all zit arm was und nie kain aigen hus gehept hat. also ward er och in ain frömd grab gelait San(n)t iohanns und ander frow[411]en fürten unse lieben frowen in die statt iherusalem in ir schwöster hus O lieber mensch bedenck den ellenden cläglichen gang un(d) das sy so iomerlich berun(n)en was von irs lieben Kindes blüt un(d) wie wol sy vor die schönste was So was sy yetzunt als ain tot mensch under irem clären antlüt Sy gieng och nit mit den drin marien zü dem grab in(n) salben Won sy des globen volkomen was und der gantz glob was allain in ir

O lieber her(r) ihu xpē. Ich bitt dich das du mir och wellist geben das min gaist un(d) min gemüt gantzlich in dir begraben werd also das ich dines lidens kain zit niemer vergesse un(d) gib mir och den grössen stain über mich das ich gewissen un(d) rúw miner sünd Und das ich och mit dir begraben werd in dz frömd [412] grab da ich laider bis her nit in bin gewesen Ach liebe künigliche müter maria Ich ermanen dich sölichs grössen schmerzen un(d) lidens Do du dich schied von dem grab dines Kindes Und bitt dich das ich arme sünderi von dinen gnaden niemer geschaiden werde und das ich och volkomen globe(n) behalt bis an min end also dz kain zwyfel in min hertz niemer kom sünd vest bestand dar an eweclich Amen

Hie nach volgen zehen innwendige liden unsers her(r)en ihu xpī die er nāch der vernunft gelitten hat die sprich mit andacht

HERre ihu xpē. min got un(d) min erlöser Ich ermanen dich dines erstenn in(n)wendigen lidens und sterbens das du hettest Do du erkantest das durch die iuden und dine finde der ge[413]walt dines himelschen vatters solt so gar vernicht werden und bitt dich lieber her(r)e ihu xpē das du mir un(d) allen menschen die diner gnaden begeren. alle unser sünde vergebest die wir ie gewürckt und volbracht haben in menschlicher blödikait und uss aigner boßhait un(d) sterck uns. das wir hin für unser kranckhait niem(m)er gepruchen wider die allmächtikait dines himelischen vatters Amen

Min süsser her(r)e ihu xpē Ich ermanen dich dines andern lidens und inwendigen sterbens Das din edle sele hette in dem wie du götliche wyßhait des ewigen vatters warer gott un(d) mensch so gar vertoret werden un(d) bitt dich lieber her(r)e Das du mir und allen menschen vergebest alle die sünde die wir in unwissenhait geton haben Und erlúcht [414] unser blintheit mit dem liecht dz du selber bist. also das wir nym(m)er sünden wider din ewigen wyßhait Amen

**D**u edler gemahel aller rainen hertzen herre ihú xpē **I**ch ermanen dich dines dritten lidens und inwendigen sterbens das din raine sele hette in der erkantnus wie die gütikait diess hailigen gaistes wurde so gar verschmecht werden **U**nd bitt dich lieber her(r)e inhitzlich von gantzem minem hertzen **D**as du mir und allen menschen vergebest alles das úbel das wir gewürckt haben uss unsers hertzen hertikait und ersüsse unser pittrikait dz wir fürbas niemer sünden wider dines gaistes gütikait und süssikait **A**men

**L**ieplicher her(r)e ihú xpē **I**ch ermanen dich dines vierde(n) [415] lidens und inwendigen schmerzens das din hohe sele trüg in ir selber und in allen iren krefftē und sunderlich als sy erkan(n)t das sy dür dinen unschuldigen tod solte schaiden von dinem lichnam **U**n(d) bitt dich lieber her(r)e ihú xpē uss grund mines hertzen vergib mir und allen menschen gnādeclichen alles das unrecht **D**as úns selen mit allen iren krefftē von dem anvang irer erschöpfung ye gewürckt haben und lāsse dir sye vätterlichen empfolhen sin an irem letzten hinschaiden von únsere armen liben **A**men

**G**Etrúwer lieber her(r)e ihú xpē **I**ch rüff dich an un(d) ermanen dich dines fünften lidens und in(n)wendigen sterbens **D**as din erwirdige sele trüg in dinem hailigen lichnam in der erkantnus das der so bitterlichen [416] durch martret solt werden und(d) ich bitt dich lieber her(r) ihú xpē in diner brüderlichen lieb un(d) trúw úber sihe und vergib úns alle súnliche und unraine ding **D**ie wir mit únsere lichnam ye gewürckt haben und haile úns mit diner hailigen sele und rainig úns mit dinem rainen lychnam. also das wir dir fürbas dienen mit kintlicher trúw in gantzer luterhait **A**men

**D**u edler lieber gemahel aller rainen selen her(r)e ihú xpē **I**ch ermanen dich dines sechsten pittren lidens und innwendigen sterbens diner sele das du gehabt hást von diner lieben mütter der rainen **I**unckfrowen marie wegen **D**as sy hette in dinem liden so grössen iomer schmerz(e)n und hertzenlichs laid das dir dan(n) ain sunderlichs sterben was **U**n(d) [417] ich bitt dich lieber her(r)e ihú xpē durch diner<sup>178</sup> kintliche(n) trúw willen die du trügt in dinem mittliden zú diner aller liebsten mütter des du mich und allen menschen dir und diner lieben mütter lassest befolhen sin in der selben trúw als du sy iohanni dinem iunger und iohannem ir bevalhest under dem crútz das du ihú xpē ain vatter un(d) maria ain mütter seit únsere selen an únsere letzten ziten und sy füret in die ewikait die du úns ihú xpē berait und verdienet hást mit dines todes pittrikait

**D**u höchster maister un(d) ewige wyßhait ihú xpē bis ermanet von mir armen sündere diner creatur und unwirdigen diener demüteclich dines sibenden lidens und inwendigen sterbens **D**as du trügt in [418] diner wirdigen sele als du

---

<sup>178</sup> Nachfolgend steht in der Handschrift *künglichen*, unterpungiert und mit rot durchgestrichen.

erkantest wie dine liebe iungeren in diner grössen not dich würden verlassen und dir als frömd un(d) unbekan(n)t fliehen und bitt dich lieber herre ihú xpē Vergib úns armen menschen dinen iungern das wir dich so vil und oft verlassen haben und úns mit mangerlay tod sünden von dir abgekert haben verpinde úns zü dir. mit dem krefftigen pannd diner liebi also das wir dich weder um(b) leben noch um(b) sterben fürbas nye(m)mer me verlassen Amen Aller getrüwester brüder herre ihú xpē bis ermant Und gedenck des achten lidens und inwendigen sterbens diner sele Das du geduldeclich trügt in dem das du erkantest wie du würdest und woltest liden von den dinen Das was von [419] den iuden Das dan(n) din volck was und under dinen iungeren und vor dem ansehen diner lieben fründ und bitt dich lieber her(r)e ihú xpē von aller crafft mines hertzen und miner sele Das du mir und allen menschen vergebest dz wir cristen menschen din sunderliches volck mit únsen manigvaltigen sünden sind gewesen ursach dines pitteren todes Sterck und hailig úns also das wir dich mit tot sünden niemer me krützig. noch mit täglichen sünden bewegen Amen

Du ewiger gott und ußerwelts lieb aller Rainen hertzen herre ihú xpē Ich ermanen dich des Nünden<sup>179</sup> laides un(d) inwendigen smertzens und sterbens an dines hertzen und sele pittrikait als du wol erkantest wie der welt din unschuldiger [420] tod würd so groß undanckberlich erzaigt Und ich bitt dich lieber herre ihú xpē Das du mir und allen menschen genädeclichen über sehest und vergebest úns manigvaltig undanckberkait in der du Dinem himelschen vatter so rihlich gedanckt häst un(d) lere úns danckbar sin dinem hailigen unschuldigen liden un(d) sterben mit úbung aller tugenden

Du anvang und ende aller ding du insigel und schloss aller lutren hertzen her(r)e ihú xpē Ich ermanen dich des zehenden lidens und in(n)wendigen sterbens un(d) schmertzens das du trügt in diner hailigen götlichen sele von únsers grössens verlusts wegen do du erkantest Das din hailige menschwörung und gepürt din fruchtbars gestrenges leben Din manigvaltigs pitters liden und [421] sterben und alle dine götliche werch die du von des hails wegen der menschen geübt hast an so gar vil menschen unfruchtbar und ewiglich verloren solten werden wan(n) din verdienen nieman zü hilff noch zü staten kom(m)et Dan(n) der sich des mit verschmechung der sünden und mit úbung un(d) würckung der tugenden würdig machet und bitt dich lieber her(r)e ihú xpē du hohes wort des himelischen vatters um(b) die gemahelschafft als du Dir hast vermähelt und verainiget und an dich genomen menschlich natur in ainer person Rainig úns lichna(m) mit dinem hailige(n) blüt un(d) únsere sele mit diner hailigen sele vor got mit diner gothait das wir

---

<sup>179</sup> Großgeschriebener Anfangsbuchstabe, aber nicht rubriziert.

dir also lebe(n) un(d) sterbe(n) dz din wirdiges leben un(d) din edels sterben  
an úns niemer verloren werde **S**under dz wir ewiglichen mugen an schowen  
dines [422] vatters allmächtikait **D**in ewige wyshait **U**n(d) des hailige(n)  
gaistes gütikait

[Miniatur: ‚Christus am Kreuz mit Maria und Johannes‘]

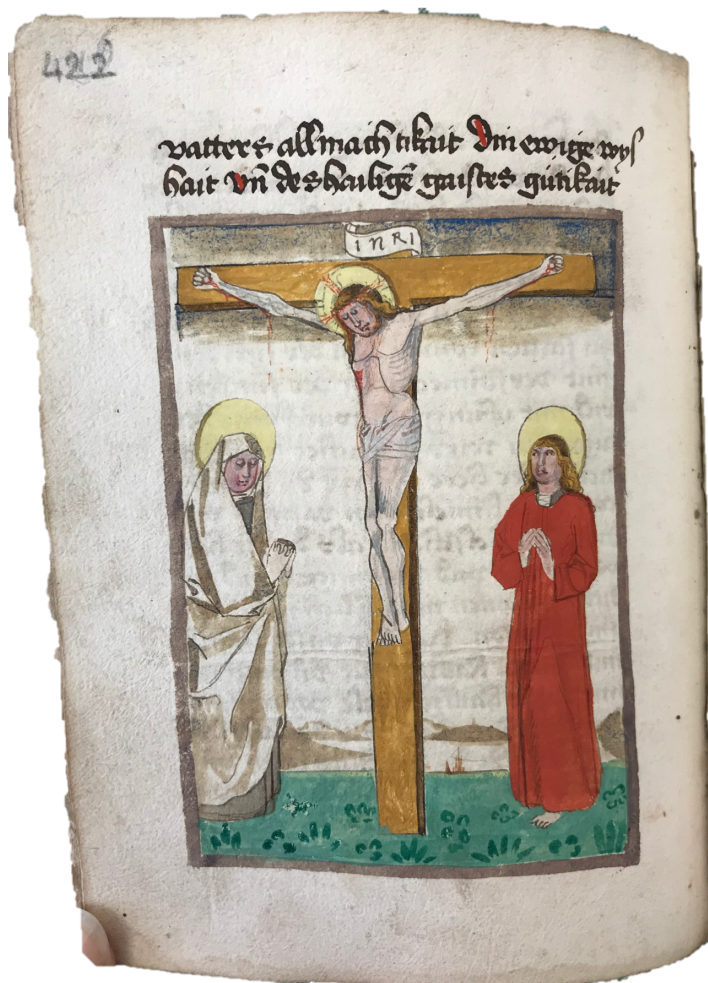



[423] Hie nach volgen drú gepett die man mit andacht petten sol vor dem crucifix an dem hailigen kar fritag und haissen die drú geschoss únsers herren ihú xpī

Das erst

HErre ihú xpē warer got von warem gott der du um(b) erlösung willen menschlichs geschlächts Das du durch schlangen gifftigen rate betroge(n) was die welt die mit súntlicher irrsal verwickelt was erlúchten und den galgen des crútzes liden und under gon woltest uff dz du das holtz mit dem holtz überwundest und den angeerbten tode der sünden mit dinem hailsamen tode under trucktest Erhör mich arme(n) und unwirdigen gestreckt ligenden vor den ogen diner götlichen maiestat der dich pitet Und benedict lobt und eret dinen hailigen und erschrockenlichen namen und [424] verlihe mir das ich dir mit luterem hertzen in inniger mitlidung und gaistlicher Crútzigung müge nach volgen dich erkennen un(d) veriehen und durch den vannen des hailigen Crútzes das ich an ze petten in dinem nam(m)en uff hútt hie her kom(m)en bin hailig mach min gemüte und min lib Bedecke mich mit dem schilt des gelobens Setz mir uff den helm des hails Und um(b) gürt mich mit dem gaistlichen schwert uff das ich krefftlich gestritten müge mit hilff diner erbarmung wider den schalkhafftigen vinde und das ich und alle die. die mit dinem hailigen nam(m)en bezaichnet sint vor der betriegung und hinterlistigkait des ungetrúwen vindes syen gesichret Amen

GOtt der du moysi dinem knecht gepottest uff ze henck[425]en ain raine schlangen uff dem wege der wüsten in dem mittel des grössen volckes zü erledigen die menschen die mit tötlicher gifft vergiftet waren also welcher vergifftiger Die selben uff geregikten schlangen an sahe Das der von sölicher gifft erlöst wrde und dz leben des gewünschten hails erlanget da mit du woltest betúttten das das du nach verlöffung vil zit um(b) hails willen dine geschopffte an dem galgen des Crútzes woltest erhöcht werden uff das das din begirliche marter die menschen die mit den wáffen des nids Durch den túfel gevangen waren wider berúffte un(d) brechte zü dem ewigen vatterland Verlihe mir armen túrfftigen súnder und allen den die mit dinem kostparn plut erköffft sind die hútt din hailge marter eren und das [426] holtz des lebens an petten Das wir die anvechtung und hinderliste des túfels durch din hilffe überwinde(n) und das wir tailhafftig werden des ewigen lebens Amen

HErre ihú xpē der du úns uff den húttigen tage an dem galgen des Crútzes von der dienstperkait des túfelss hast erledigt uff das. Das du den menschen an dem tag. Daran du in erschaffen hetttest. och an dem selben tag widersprechtest erhör mich armen súnder. Der vor disem hailsamen zaichen des Crútzes siner sünden bekennet un(d) ablas der selben flechlichen pittet das du mich in dem schirm Dines erwirdigen und lebendigen holtzes vor allem úbel behútttest und

das ich in der crafft dines todes muge vertriben die fürigen geschoss des schalckhafftigen vindes und von dem ewigen tode er[427]ledigt werden und komen müge zü dem ewigen leben **Der** du mit gott dem vatter in ainikait des hailige(n) gaistes lebst und her(r)schest **Amen**

**An** dem andern tag an dem **Sambstag** do komen die iuden zu pylato un(d) sprächen her(r) wir gedencken wol das diser úbel tätiger hat gesprochen do er denocht lebt er wölt nâch drin tagen erston **Darum(b)** bitten wir dich das du des grabes wellist haissen hütten das sin iunger icht sprechen er sy erstanden und das die letzt irrung böser werd denn die erst **Pylatus** sprach nem(m)ent hütter und haissent es behütten als ir wol kun(n)ent **Sy** giengen enweg und bestalten hütter und versigoltent den stain mit iren insigeln ob dem grab

#### **der Österlich Aubent**

**An** dem **Österlichen Aubent** [428] söllent ir úch gesellen zü únser lieben frowen der iomer und bitterkait do unsaglich was won sy do den schmerzen allain trüg an ir lieps kind. **Das** des tags lag tot in dem grab und was ir als innig alles das sy von irem lieben kind ie gesehen hatt und gehört. lieb un(d) laid **Das** erbildet sich alles in ir hailigen sel mit tusentfaltigem schmerzen **Und** darum(b) des selbe(n) tags sol ain ieclicher cristenlich(er) mensch größ mit liden mit ir han und besunder sy eren mit andächtigem gebett **Und** sprich dise vermanung un(d) gebett

**Ach** erbarmhertzige getrúwe un(d) min allerliepsti müter maria ich naig mich demüteclich für din hohen wirdikait un(d) bitt dich das du min armen sündnerinnen nit versmahist und gund mir **Das** ich mich zü [429] dir nahi **Ach** und das ich dins ain gebornes kind liden und sterben dir helfff erzellen und in bitterkait mins hertzen sinen ellende(n) tod clagen **O** müter aller gnâde(n) **Ich** clagen dich hútt mit grösser mitliden um(b) den schwären grundlosen abzug und abgang dins aller lútsälgoste schönsten lieplichosten suns den müter in zit ie gehatt **Ach** das der dir so ellentelich unerlich und cläglich ist ertöt so unschuldeclich **Owe** getrúwe müter wie mag dz grundlos hertzlaid din zartes mägtliches hertz erliden an sterben **Owe** edli sel din wie ist das so scharpff wol schniden schwert her(re) **Symeonis** durch die getrengt **Daran** du steckest in senender qual als ain sterbender mensch an sinem hin ziehen **Owe** enkains menschen liplich sterben [430] wie angstlich das ie was und noch ist das mag sich noch den(n) diner quällenden not in tötlicher betrüpt nit gelichen **Und** besunder ermanen ich dich des grundlosen iomers den du hattest do din hertzlieps kind todt vor dir lag und du im sin tieffen wunden úbergust und fultest mit dinen haissen trähnen und der betrüpten ellenden wort die du noch do zü im retttest **Do** du also sprächt und wol sprechen mochtest **Als** von dir hât

gesprochen der süß lerer Sanctus<sup>180</sup> Bernhardus Owe und ach liechter tag der  
 alle die welt erluchtet wie bist du so gar betunckelt Owe und ach aller  
 wunnlichoster blüm und aller schönster ros und aller minneclichoster gilg  
Des minneclichi und schönni und wunneclichi ist úber alle dise [431] welt wie  
 bist du so gantzlich erblichen und zerfallen Owe und ach aller süssesten  
 audren die ie geflussent von götlicher süssikait und von aller erbärmd wie sind  
 ir so gantzlich ersigen das ain tropff blütes mit in úch ist beliben Owe und we  
 und vil we. mi(n) aller liepstes ain gebornes hertz liebs kind mins wie ist din  
 marter so gröss gesin Das du so unerkannt bist worden won wisti ich nit das  
 du min kind wärist Ich erkannti dich yetzent nit Owe milte müter des und alles  
 dins unmässigen hertzlaides bis gegen mir armen sūnderinen nit vergessen Ach  
 gib mir es in befintlichem mitliden mit dir ze tragen und die hohen minn mins  
 lieben her(r)en ihú xpī in der es alles Durch mich und für mich hāt gelitten  
 danckberlich an ze sehen [432] und in minem hertzen niemer me ze vergessen.  
 besunder in dem grab mins hertzen grund alle zit sin gegenwürtikait  
 beschlossen hab un(d) danckberlich. gott dem ewigen vatter wider uff trag Ach  
 du edle mägtlichí kúnigin bis mir och gnädenlich beholffen in allen nōtten der  
 sel und des libs Besunder<sup>181</sup> an der letzten stund mins tods O so lass mich nit  
 verwaiset werden von diner müterlichen trostlichen gegenwürtikait O den(n) so  
 empfang miltenclich mi(n) sel und für sy in die angesicht dins lieben kindes da  
 ich mich frōw mit im und mit dir iemer ewenclich Amen  
O aller miltesti frow Ich waiss und erkenne wol dz din müterliches hertz un(d)  
 sel manigvalteclich verwundet ist in der marter und tot Dins ain ge[433]bornen  
 suns Do du hortest Die ham(m)ersleg mit den er an das fron crúz genegelt  
 ward der iuden scheltwort spottwise die sy triben vor dem crúz do sy wegten  
 ir höppter und sprächen Siest du gottes sun so hilff dir selb und ander ir grülich  
 geschray und vil anders Aber liebe frowe das ist nu alles dir bekert in ain gantze  
 und volkomen frōd Daurnb sälige frow in die frōde ere und wirdikait die du  
 mit dinem ain gebornen sun ewenclich besitzest und um(b) das liden und  
 schmerzen die du mit im in diser welt erlitten hāst Empfilch ich dir alles das  
 das mir liplich und gaistlich nottürfftig ist. Hie erzelle únser frowen was dir  
anlige. [434]

<sup>180</sup> Großgeschriebener Anfangsbuchstabe, aber nicht rubriziert.

<sup>181</sup> Großgeschriebener Anfangsbuchstabe, aber nicht rubriziert.

[Miniatur: ‚Auferstehung Christi‘]

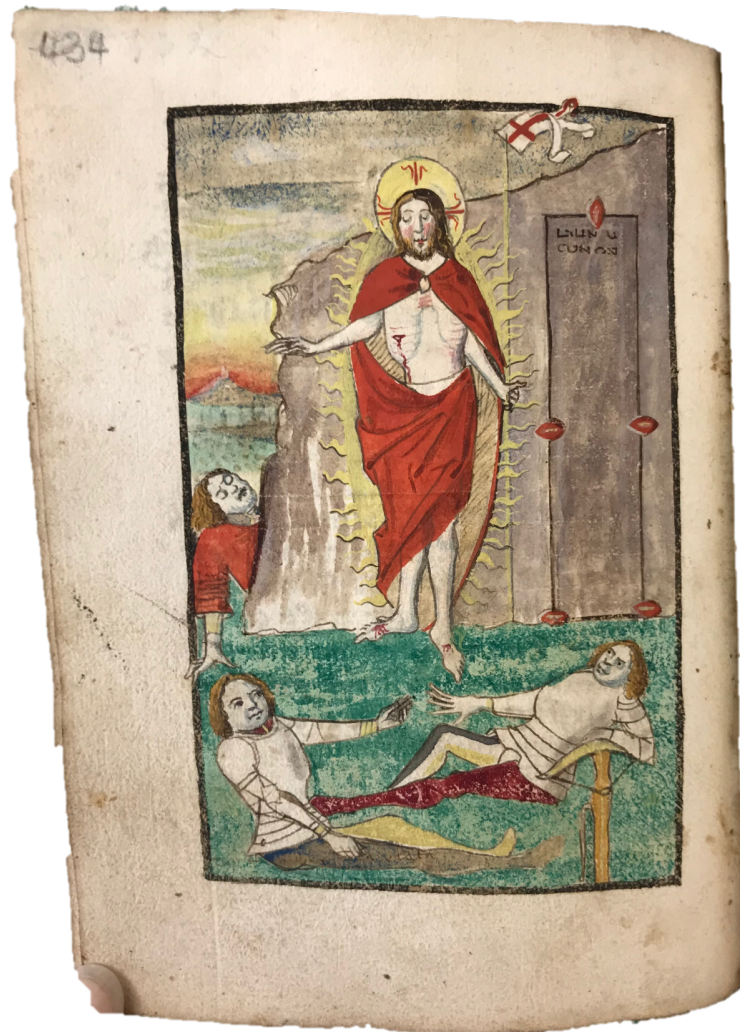

[435] Und an dem österlichen tag nach mitternacht gegen dem tag **T**ratt unser herr krefftelichen uss dem beschlossnen grabe uff dz ertrich mit grössen fröden und gewalt das die erd erbidmet als ob sy sich fröwet und die hütter des grabes erschracken also sere das sy würden als totlút **D**ie todten stünden uff von den grebern die sunn gieng dry stund **E**e uff den(n) uff ainen andren tag **S**y spilt und glitzt clarlich als ob sy sich och fröwet **D**o die hütter die grössen zaichen sähent do giengen sy zü den iuden und saiten in das unser her(r) erstanden was do erschracken die iuden des un(d) glopten in gröss güt das sy sprächin die iunger hettin den lichnam ihú verstolen do sy schlieffind. [436]

**O** lieber her(r) ihú xpē **I**ch bitt dich das du mir din hailigen hütter die engel senden wellist das si min hertz und sin(n) behütten vor den bösen gedencken willen und werken das ich frölich mit dir erstand an dem iungste(n) gericht und versigel och min hertz das der böse gaist nit dar in komi und mich zü den sünden ziehi und das ich och krefftelich mitt fröden tritt uss minem grab un(d) nit erschreckt werd sūnder frölichen vor dir an dinem gericht stand an dem iungsten tag mit dinen erwelten und da berüfft werde zü dem ewigen leben un(d) das ich kain güt nām dz wider min gewissin und sel sy als die iuden tätent

**A**n dem Sonnentag an dem österlichen tag frü kam maria magdalena [437] und ander zwo marien zu dem grabe und wolten den lichnam únsers her(r)en salben uff dem weg retten sy under enander wer tüt úns den stain von dem grab do sy da hin kamen do sahen sy dz der stain von dem grab was und ain engel sass uff dem stain mit wissem gewand als der schne **D**ie frowen erschracken von siner angesicht **D**er engel sprach **I**ch waiß das ir ihesum von<sup>182</sup> **N**azareth süchen den crútzgoten **E**r ist nit hie. er ist von dem tod ertsande(n) **S**ehent die statt da er gelege(n) ist gond bald sagent sinen iungern und petro das xpūs von dem tod erstanden sy und das sy gangin uff den berg thabor in galilea da sölle sy in sehen alle mitenander. **M**aria **M**agdalena lieff ze stund zü sant **P**etern un(d) sant **I**ohannsen und sprach wainend [438] och. man hat mines her(r)en lichnam uss dem grab genom(m)en un(d) waiss nit wo man den hett hin gelait **P**etrus und iohannes luffen gar sere gegen dem grab **I**ohannes kam(m) ee dar denn petrus **S**y<sup>183</sup> schluffen in das grab sy sahen die tücher da er in gewunden was und giengen wider dannen

**O** lieber her(r)e ihú xpē **I**ch bitt dich als die frowen erschracken von dinen engeln sitzent uff dinem grab dz ich nit erschreckt werd von den bösen engeln an dem end mines todes **S**under sende mir dinen hailigen engeln der mich tröste und behút vor allem úbel und gib mir lieber her(re) das ich dich och süch mit sölicher liebi und minn als dich die lieb maria magdalena sücht und dich och

<sup>182</sup> Nachfolgend steht in der Handschrift *za*, unterpungiert und mit rot durchgestrichen.

<sup>183</sup> Großgeschriebener Anfangsbuchstabe, aber nicht rubriziert.

vind [439] als sy dich vand und gib mir lieber her(r) das ich och löff zü dir un(d) bedenck din marter tod und urstendi und der in minem hertzen niemer vergesse **A**men

**E**s giengen zwen iung(er) der zwen und sibentzig an dem tag in ain **C**astelle und redten von den dingen úns(er)er her(r) fügt sich zü in als ain bilgri un(d) sy sprachen waist du nit was geschehen ist hie das hútt der dritt tag ist und die engel habent gesagt das er erstanden sy ihesus sprach ir toren wie sind ir so träge an dem globen das ir nit globen haind darnach erkanten sy in an dem brechen des brots

**A**n dem andern tag als die iunger by enandern wären do kam(m) úns(er)er her(re) in gon durch beschlossenen turen und [440] stünd enmitten under sy und sprach der frid sy mit úch **S**y erschrackent. **E**r sprach haind ir nit ze essen da by erkennent das kain gaist isset **S**y laitent im ain gebräten fisch für und ain honig roß **S**an(n)t thoma was uff die zit nit by den iungern und als er hort dz úns(er)er herr by in was gewesen **E**r<sup>184</sup> sprach **I**ch glob nit **I**ch leg im den(n) mine vinger in sin wunden **Ú**ns(er)er her(re) erschain in an dem achtenden tag und sprach **T**homas leg dine vinger in min wunden und versenck din hand in min syten und bis glöbig. und sálig sind die es nit griffent oder sehent und doch globent **O** lieber her(re) ihú xpē **I**ch bitt dich das du mir ouch erschinist als ain bilgrin und mich in din herberg fürist und mich spisest mit brot dines [441] hailigen fronlichnams **O**ch bitt ich dich das du durch die beschlossene tür mines hertzen in gon wellist und och frid und sún dár in(n) machist das ich dir mit ainem lutern hertzen gedienen kunne. **O**ch gib mir lieber her(re) das ich nit trág sy an dem globen **S**under starck und vest und das ich niemer gevalle in kainen zwyfel. sunder **E**wenlich darinne belibe

**D**iss gebett und vermanung **S**prich an dem österlichen tag un(d) och die selben acht tag all tag mit andächtugem begirlichem hertzen.

**D**ie loblich urstendi

**O** Hoher adel allmächtige herschafft götliches gewaltes **O** du hohi edli wirdigi vergötteti person ihú xpī nach der tieffensten vertruckung und pinlichosten gestorbenhait **D**ich selbz [442] wider woltest ernúwren **D**es bis hútt von mir diner arme(n) creatur ermanet **O** du vergöttendi erwirdigi aller minnendesti sel únsers lieben her(r)en ihú xpī **I**ch ermanen dich wie mit so grössem durch schinendem glantz diner clarhait du dich wárt richten in das beschlossene grab dár **I**nn din tötter lib vil hailiclichen lag und durch din almächtigen crafft ietz bereit was und wider gebildet ze der urstendi **A**ch wie mit zü gefügter ewiger minn du dich mit im veraintest und wider an dich nempt von dem du dich mit grundlosem schmerzen in todes bitterkait hettest geschaiden und nun in

---

<sup>184</sup> Großgeschriebener Anfangsbuchstabe, aber nicht rubriziert.

lebricher wunn und clarhait dich mit im do wärt verainen in unmässiger  
süssikait **E**ya du uss erstandner löw von iuda [443] **A**ch wie wärt du mit din  
selbz aigner vätterlicher crafft und kaiserlicher her(r)schafft und mit  
kúnglichen eren uff erston von dem tod **O** do die stim(m) dins himelschen  
vatters dich sinen gemin(n)ten sun so krefftenclich uff geweckt hât von dem  
schläff des todes **U**nd hat din edli menschait wider ernúwret und begabet **D**ie  
da so menig tusent wunden gehept hatt und mit schmerzclichem ser alles din  
**C**ostbars blüt us gossen hatt so gar dz menschliche fúchtikait in dir nit belaib  
und also ersigen un(d) erdorret nackent was hange(n)t an dem hailigen fron  
**C**rútz **A**ch die ist hútt in diner frölichen urstendi von dinem himelschen vatter  
her(r)lich beclaidt und clarificiert mit dem claren sunnen schin siner hohen  
[444] gothait durch schmeltzt mit dem rot guldinen rubin siner vätterlichen  
inbrúnstikait wider grüne(n)t und blüeyent in ewiger untödemlichait. geziert mit  
clainfüger subtilichait **E**ya wie frölich und begirlich geiubiliert haind in diner  
clärten urstendi die engelschen gaist die sich also min(n)samclich únser  
erlösung un(d) wirdikait gefröwt haind und das och begirlich us gerüfft un(d)  
gekúndet haind **A**ls sy den stain gewaltenclich ab dem grab uff hüben und dar  
uff saussent un(d) die betrúpten darkomenden die dich iren gemin(n)ten  
her(r)en allain süchtent **S**o lieplichen trostent und die frölichen mâr diner  
urstendi inen verkuntent und geloptent **D**as du dich inen erzögen weltist ze  
sehen [445]



[Miniatur: ‚Christus erscheint Maria‘]

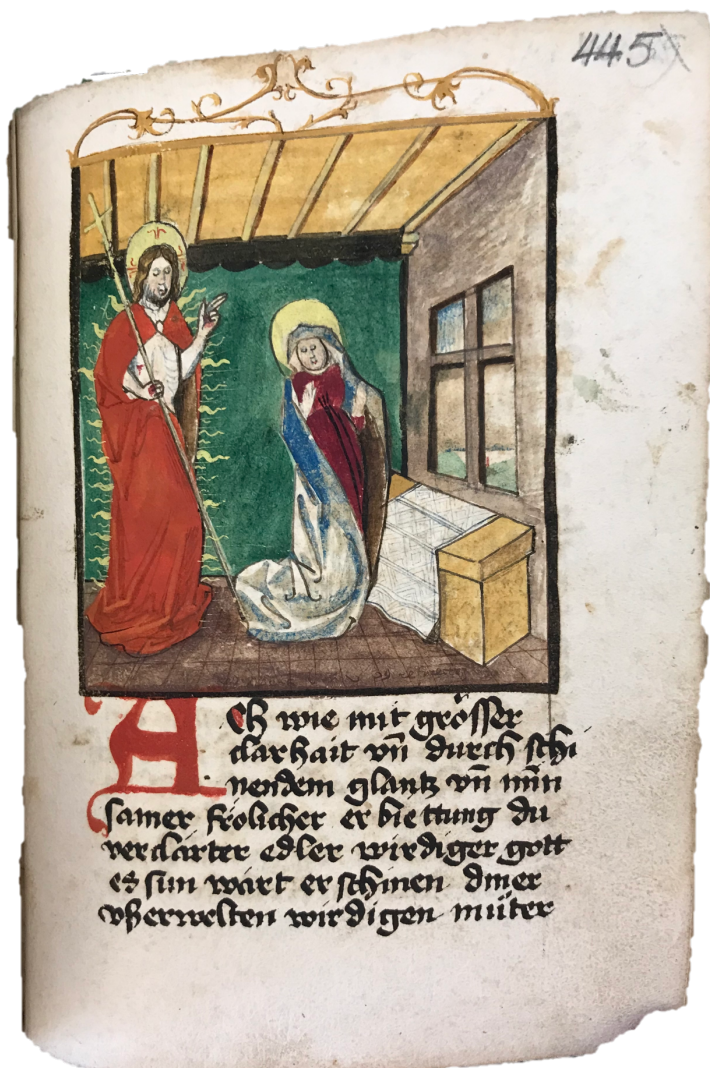

**A**Ch wie mit grösser clarhait un(d) durch schinendem glantz un(d) min(n)samer frölicher erbietung du verclärter edler wirdiger gottes sun wärt erschinen diner ußerwelten wirdigen müter [446] die in so größer betrüpt un(d) grundlosem hertzlaid sich nach dir irem zarten lieplichen kind und ainigen trost **S**enet und die grim(m)en not dins lidens und angstlichen sterbens on underlās an sah da von so menig tötlich schwert ir edlen sel tusentfaltentlich **D**ürch tran(n)g mit núwer schmerzlicher mitlidung und doch mit gantzem globen und züversicht **U**nd bekantnus also wartet demütenlich diner clärten ürstendi die sy ob allen menschen bekant und festentlich gelopt **E**ya des unmessigen frölichen anblicks do sy dich des ersten ersah und anblickt **A**ch der durch gieng behend all crefft ir sel da von sy erkickt und uff gemündret würdent uss grundloser betrüptlichait in fröliche hüg[447]lichait **A**ch der minnsamen lieplichen erzögun in der<sup>185</sup> du dich ir bewistest und so clarlich wärt erschinen also ver(r) das ög ir natur das noch den(n) über natúrlich gesterckt wart dich do mocht gesehen und so haimlich und begirlich zü ir tät in dem alles ir liden und laid zergien **E**ya wie gnadrichlich wärt du und min(n)richlich erschynen diner usserwelten minnerinen **M**arien magdalenen die so gruntlich verwu(n)nt und betrüpt was und so mit grösser iomer nach dir belanget und sy so gar ellent un(d) trostlos was das sin weder engel noch mensch nit enmocht getrösten **B**is das du ir selber wärt erschynen mit grösser minn un(d) din geware verclärte urstendi ir erzögen da von all krefft ir sel unmässenlich erfrowt würdent [448] von diner erwirdigen min(n)samen gegenwürtikait die selben din frölichen urstendi **S**y frölich un(d) begirlich si dinen lieben gemin(n)ten iungern was verkünden und beweren **D**enen du och selber wärt erschynen und durch beschlossen türen zü inen in giengt **A**ch wie recht vätterlich und frölich du sy grütest und dinen ewigen frid inen so begirlich wärt wúnschen und geben und din hailgen hend und füss inen zogtest und din verclärten urstendi mit mengen honig fliessenden worten un(d) loblichen zaichen inen bewartest da mit du irs gaistes ogen uff tet dich iren gemin(n)ten herren und getrúwen vatter ze bekennen und ze globen der doch fast in irem hertzen in deinem liden und sterben under gangen was und verblichen won sy so gar durch hertz [449] und durch sel ze grund betrüpt warent um(b) din unmässigen marter und angstlich bitter sterben **A**ber nun sind sy frölichen erfrowt von diner min(n)samen gegenwürtikait und diner loblichen urstendi darum(b) ist alles ir hertzlaid verschwunden **A**ch du min(n)eclicher her(r) ihú xpē **N**un bitt ich dich durch din frölichen ürstendi das du min hertz und min sel erfrowist mit ainer lutren gewissni also das ich warlich uff erstand von allen minen sünden in ain núw leben mit allen tugenden und daran stät belib untz uff

---

<sup>185</sup> *der* steht zweimal in der Handschrift; Schreibfehler?

min end und dich denn mit allen fröden schowe und niese und der ewigen  
sälikait on ende iemer ewenlichen Amen

das ist die urstendi únsers lieben herren da vor sprich xv p(ater) n(oster) un(d)  
xv ave ma(ria) und die ermanung [450]

GEwaltiger gott O sighaftiger gott O starcker got ich danck dir und erman dich  
der gewaltigen und frölichen urstend als du an dem österlichen tag erstanden  
bist wär gott und mensch und mit dinem göttlichen gewalt überwunden hast  
alle dine vygent O her(re) ich ermanen dich der fröden die du hettest do du  
erkantest das din himelische menschait clarificiert was mit diner claren gothait  
un(d) all din not überwunden hettest dz kain liden niemer mer fürbas an dich  
gefallen mocht und als menschlich geschlächet erlediget hettest von dem  
ewigen tod un(d) der will dins himlischen vatters gentzlich volbracht ward Ich  
ermanen dich och der fröden der hailigen altvätter die du erlöst hāst uss der  
vinsternus der vor [451] hell und der fröden diner lieben mütter marie und der  
lieben magdalenen und diner lieben iungern und der gezúgnus cristenlichs  
globens wann der in allen menschen hertzen erlöschen wz dann in dem  
mägtlichen hertze(n) marie diner lieben mütter Nun bitt ich dich lieber her(r)  
durch die unsäglichen fröd diner hailigen urstend das du erfröwest min arme  
sel die so ser betrübt ist worden von dem schwären langweren tod mins  
süntlichen unerkannten leben Darumb min hertz so gar erstorben ist an allen  
rainen tugenden und überwunden bin von dem gewalt miner vygent verain din  
göttlichen crafft mit miner krancken menschait das ich erstand von allen minen  
sünden Erkick min erstorbens hertz mit dinen gött[452]lichen gnaden das an  
mir lebendig werd alle die tugent die an mir erstorben sind und darinn gefestnet  
werd das ich in kainer sünd niemer ersterb und alles min leben vollbracht werd  
nach dinem aller liebsten willen und bestäte mich in ainem stätten vesten  
kristenlichen globen yetz und an der zit mins todes O her(r) in dem engstlichen  
strit miner letzten zit So hilff mir an gesigen allen minen vigenden durch die  
crafft diner götlichen signus un(d) gib mir zü erkennen das ich all min not  
überwunden hab Verclär min sel mit diner götlichen bildung das sy empfangen  
werd in die schar diner usserwelten fröd die dich in gantzer sicherhait und fröd  
eweelichen niessen sint. Herr durch die fröd diner urstend hilff allen  
todsündigen menschen das sy erstandint von [453] allen tod sünden und die  
von tod sünden erstanden sind die sterck und krefftig zü dem leben nach dinem  
liebsten willen Erfröw all glöbig selen das sy erstandi von allen iren nöten in  
die fröd des ewigen leben. hilff úns mit dinem siglichen gewalt überwinden  
das anfechtig leben darin(n)e wir stäteclichen stritent also dz wir an dem  
iungsten tag frölich erstandi in der schar diner ußerwelten das wir dich  
ewenlichen niessint und schowind in den fröden darzü du úns von anvang  
gedächt hast O maria mütter und magt bis úns bitt gegen dinem lieben kind

durch das frölich angesicht das du zü dem aller ersten ansächt in untötlicher clarificierter menschait und durch die vestikait dines starcken globen der allain [454] bestünd in dinem rainen hertzen bestand úns by in dem iomertal dises ellends das wir dich schowen werden in den fröden die wir verdient haben in unserm ersten von den sünden und die du úns geoffnet häst mit diner mägtlichen rainikait das wir die mit dir und du mit úns eweclichen niessen syen in yemerwerenden sicherhait **A**men

**D**<sup>186</sup>útt ist der frölich österlich tag den gott geschaffen hāt in dem wir uns sond fröwen und wider fröwen in iubilieren **H**útt ist xpūs erstanden von dem tod mit sinem grössen götlichen gewalt und mit siner gүнlichen mayenstat mit grүнender blүgender menschait verclārt und glorificiert mit siner hohen gothait mit ewiger undö[455]demlichait **H**útt ist der gүнlich österlich tag das die fin clar edel sel xpī frölichen zü der hell gevaren ist und zerbrochen hett mit ewigem göttlichem gewalt veraint mit siner clarhait und mit küniglich enen mit kaiserlicher herschafft mit der brin(n)enden seraphin die für gesent wurdent zü ainer geziert vor dem anlút únsers herren das sy verkún(n)tint sin frölichen gegenwürtikait und sin götlichen herschafft **D**iss ist die loblich frölich procession von dem all hohzitlich crútzen(n)g ir geziert und ir wirdikait genom(m)en haind **H**útt ist der tag das her(re) moyses die kind von ysrahel uß Egypten<sup>187</sup> land durch das rot mer in das verhaissen land gefürt hat und hat sy gefrýet von dem dienst und gewalt pharaonis **H**útt ist der hohzitlich **Ö**sterlich tag [456] das der gewār moyses **X**pūs der hell port zerfürt hett und die erinen tor un(d) die ysinen rigel zerbrochen hett und den frúmer des ewigen tods das was der bös gaist und den hett er so gewaltenclich und so krefteclich gebunden und hett den finstren kerker der vorhell erlúchtet mit dem liecht und mit dem glantz siner götliche(n) clarhait un(d) sines götlichen gewaltes **S**o haind sich gewundret die hell fürsten das sy sprāchent **W**er ist der also starcker **W**er ist der also schinender **W**er ist der also erschrockenlicher **W**er ist der also wirdiger **U**nd die hell fürsten antwürtetent ain ander **E**r ist ihesus nazareus genant der úns lazar(u)m mit gewalt únsern gevangnen nam die wir mit falschait in dem paradís hettent genomen **D**iß ist der frölich österlich tag dz der [457] kúnig und der kaiser himelrichs un(d) ertrichs sin userwelten fründ die sin fünff tusent iār gebaittet hetten mit grösser begird und die hāt er hútt frölich gegrützet un(d) mit disen wortten. **F**rid sy mit dir **A**dam. und mit allen dinen kinden und mit allen minen gemin(n)ten un(d) er hat inen geben den sig den er erstritten und erfochten hāt an dem hailgen fron crútze mit den worten die er zu

<sup>186</sup> Fünfzeilige Initiale.

<sup>187</sup> Großgeschriebener Anfangsbuchstabe, aber nicht rubriziert.

im sprach **K**oment her zü mir die min bild haind un(d) mir gelich sind won ich han üch erlöst an dem crütz **H**ütt hāt der gewār moyses xpūs. adam frölichen gegrützet und hat och **E**va sin kaiserlichen hand gebotte(n) und hat sy gelaitet uß egypten land und das ist uss dem vinstren kerker der vorhell und von dem schatten des ewigen tods un(d) hett sy gelaitet<sup>188</sup> [458] durch das rot mer **D**as ist durch die fünff himel strässen und die fünff guldinen himelperten siner hailigen fünff minnzaichen **D**ie da uff entschlossen würdent an dem hailigen fron crütz mit dem blick schoss siner vätterlichen minn und erbärmd die da ie und ie verborgen was in dem tieffen abgrund des vätterlichen hertzen gegen allen menschen und durch die fünff guldinen porten so werden sy in geführt **D**urch die himel porten in das himels land das er inen erstritten und erfochten hett an dem hailigen crütz und geköffet hat mit sinem rosvarwen blüt und als hütt disem österlichen tag versichret hett und gegeben hat das sy sond schowen un(d) niessen den gewalt des himelschen vatters un(d) die wyßhait des ain geborne(n) suns **U**nd die blüeyenden clarificierten menschait xpī wie die richsnet un(d) [459] blibet mit der hohen gothait und die süssen minn des hailigen gaistes mit der sy versoffet und versencket sint in das núw minn **D**er ewikait und in das túnsterlich abgrüntlich wesen der hohen gothait **D**a sölle sy swim(m)en und schweben un(d) versinken von abgründ ze abgrund und doch abgrund niemer finden das ist die höchst sälikait aller himelschen gaisten da schowent sy ir gewordenhait in der ungeformten<sup>189</sup> gothait und das bild der hohen drivaltikait versenckt und versiglet in ir entwordenhait **H**ütt ist der tag das der starck löw mit siner krefftigen stim(m) sin iungen löwli von dem tod erkikt hett die die löwin tod geboren hett **H**ütt ist der hohzitlich tag das der starck krefftig alt löw der himel vatter sinen iungen löwen sin ain gebornen sun frölich und [460] und gewalteclich uff geweckt hat von dem schläff des todes mit denen wortten **S**tand uff min günliche. stand uff min wun(n). stand uff min fröd min hin<sup>190</sup> min hohen gotthait glorificierer din blüeyenden menschait in ewiger untödemlichait **I**ch wil dich krönen mit unlidlikait mit schneller subtilikait in yemer werender sicherhait **N**imm hin den kúnglichen zepter mines götlichen gewaltes in din kaiserlichen hand das du gewaltig sygist über himel un(d) über ertrich un(d) über all creaturen. als xpūs selber spricht mir ist gewalt geben über himel und über ertrich das ist der starck krefftig krönt löw der da zerknüstet hat des tracken hopt und ertödet hat den alten schlangen unsern alten vident unsern tötlichen vident **D**er uns verstössen [461] hett von

<sup>188</sup> Nachfolgend steht in der Handschrift *uss egypten land un(d)*, unterpungiert und mit rot durchgestrichen.

<sup>189</sup> In der Handschrift steht *ungefomten*.

<sup>190</sup> Schreibfehler?

dem yr(r)deschen paradys und diser löw hat úns uff entschlossen sin rosvarwes blüt **H**útt ist der frölich oster tag **D**z das zart minneclich lembly der hohen gothait frölich von dem tod erstanden ist mit der löwlichen crafft siner himelschen vatters das da an dem hohen dornstag ain süssi spis was siner gemin(n)ten iunger und an dem karfritag von ainem richter **Z**u dem andern gefüret ward und so senfftmüteclich stünd vor dem schuldigen richter mit vätterlicher minn und erbärd und mit brüderlichen trúwen **U**nd mit gemächlicher frúntschafft gegen allen menschen un(d) der ist also hútt ain kröntes osterlembly mit der loblichen kron siner himelschen vatters **U**n(d) treit in siner hand ain rot guldin fan siner götlichen signust kúnglicher [462] eren und kaiserlicher her(r)schafft **D**iser rot fan bezaichnet das rot farw costbar minnrich blüt des kröntes osterlemlis xpī und sin brin(n)enden götlichen minn mit den zwain únß diss gekrönt osterlemlis erstritten un(d) erfochten hett das himelschlich vatterland **D**iss osterlamb ist ain kúnglich gezierd alles des so in himelrich und in ertrich ist **H**inacht ist die frölich nacht das der starck **S**amson die porten der statt gantz zerstört hett und sy uff getragen hett úber die spitz des bergs und ist gefrýet vor allen sinen vygenden **D**iss ist ain hailig hochzit der hohziten das der starck krefftig **S**amson xpūs uss dem beschlossnen grab gewaltenclich und frölich erstanden ist in dem grab da er gevangen in lag in dem gewalt und behüt siner vygent [463] das sy sähint sinen kaiserlichen gewalt do erschrackent sy also sere als ob sy tot wärint **H**útt hett xpūs das verloren schäffli uff sin achseln genomen und hett es wider brächt in die waid der himelschen grüni und da söllent sy in gon durch die guldinen porten der clarificierten menschait xpī in das abgründ wesen **D**er hohen gothait und gond wider us in sin hailigen menschait und sy vinden wol waid sy gangint us oder in da gond sy uff den himelsche(n) berg her(r) moysi zü dem edlen schäffli der engel die da gespist werdent von dem himelschen tow der hohen trivalentikait **H**útt ist der österlich tag **D**as die hütter des grabs ze iherusalem kúntent die frölichen mār **D**as xpūs von dem tod erstanden sy und darumb do ward pylatus und die iuden gar betrübt [464] und die iuden baten die hütter des grabs das sy es liessint verholen sin und das sy sprächint die iunger haind in uns gestolen **U**nd wenn sy das wöltent sagen so sprächent sy **H**útt ist únsere hailant den die iuden gemartret haind gewalteclich und frölich erstanden von dem tod mit geblümter menschait veraint mit siner hohen gothait **H**útt ist **I**onas der prophet wider ze lannd komen der da verworffen was in das mer und lag in dem hertzen des fisches untz an den dritten tag das er stilte des wassers wetter des mers **H**útt ist der loblich österlich tag das der gewār **I**onas xpūs der da geworffen was in dz mer der bittren welt um(b) das er gestilte das wasser wetter siner himelschen vatters gegen allen menschen und er begraben lag in dem [465] ertrich untz an den dritten tag der also hútt frölichen erstanden ist von dem tod das dem der



tod niem(er) me an im gerichsnet als der apostolus spricht **C**rist ist erstanden  
 von dem tod v(ersus) **H**útt ist der herrlich österlich tag das die fünff  
 minnzaichen wider gegrünet haind die sich an dem hailige(n) crútz uff  
 entschlussent zü ainem sún und ze erbärmd gegen allem menschlichen kún und  
 so gar verdoret warent von der angstlichen not sins grim(m)en todes und die  
 sind all hútt wider grünet worden un(d) blügent und sind durch schmeltzet mit  
 dem rot guldinen rubin sins rosvarwen blütes **U**nd diss sind die minnbrief in  
 dem unser nam(m)en geschriben sind mit rot guldinen bûchstaben sines  
 rosenvarwen blütes und er wil sy bringen sinem himelschen vatter [466] und  
 allem himelschen her(e)<sup>191</sup> das sy da schowint wie recht lieb im der sûnder sy  
**H**útt ist der frölich österlich tag das das rosvarw blüt xpī frölich mit im  
 erstanden ist an dem karfritag so verschmächlichen us gerottet und us getriben  
 und under die süss der figent ward getretten **U**nd enteret un(d) das hett er als  
 hútt mit clingender fröd und mit geblümter gezierd wider an sich genommen  
 und er wil es bringen sinem himelschen vatter zu ainem krom und zü ainem  
 clainet für sin zarten gemählin die hailigen cristenhait für alles das sy im  
 schuldig ist **H**útt ist der gûnlich tag das die rören der auderrichen erbärmd xpī  
 wider gegrünet sind die sich an dem hailigen crútz ersigen hettent und die sind  
 als hútt wider gegrünet und blüy[467]ent worden und verclärt mit dem  
 glorificierten blüt siner hailigen menschai ain türres schoss das ist ain tarben  
 und ain torren alles des so die natur trost inn süchen mag **Z**ü dem andern mal  
 wenn der mensch kum(m)et uff die volkomenhait aller gaistlicher richait das  
 den(n) der mensch demüteclich widerganng in allem dem das im gelúchten  
 mag und sich gott lauss allain minnen un(d) mainen in allem sinem tûn und  
 lon. **D**iss sind die rot guldinen kener die sich ergiessent in die tötten audren  
 unser sel un(d) úber fliessent das túrr ertrich únsers hertzen das es grünen wiert  
 und blüyent in siner götlichen minn als ain blüyendes paradís in dem süsseclich  
 sy ze wonent der hohen drivaltikait won er es zieren wil mit dem vigel [468]  
 rechter demüt und mit wýssen gilgen mägtlicher luterkait un(d) mit dem himel  
 varwen blümen volherteter stätikait als der lieb xpūs selb spricht **D**er  
 volhar(r)et untz an das end **D**er wirt behalten und das ist geziert mit ainer  
 blüyenden roten rosen studen die da wachset uss der würtzen ainer gehorsamen  
 gelâßenhait mit den iungen blüyenden schösslin und die bezaichne(n)t ain uff  
 gericht gemüt in das ainig ain der hohen gothait und gezirt ist mit dórnen  
 kintlicher vorcht gen dem himelschen vatter als der wyßsag david spricht **D**ie  
 vorcht des her(r)en ist ain anvang aller wyßhait sy ist och geziert mit dem wider  
 biegen der schossen die da bezaichnent **D**as wider biegen des menschen **W**ider  
 uff in selbs vernichtikait und ist geziert mit [469] den grünen blettern aller

---

<sup>191</sup> In der Handschrift steht *her(re)*.



tugent volkomenhait roten rosen brin(n)ender götlicher minn die ain anvang und ain end ist aller sälikait. **N**un helff uns der allmächtig gott das wir frölichen mit im erstandint nun und iemer ewenlich **A**men **H**útt ist der hohzitlich österlich tag das der kúnglich tempel her(r) Salomonis<sup>192</sup> frölich gebuwen ist den die iuden zerstört hetten an dem karfritag un(d) **D**as was die minneclich menschain xpī und die ist wider uff gebuwen und gerichtet mit dem wol geordneten stainen gepulvert würdent von den ham(m)er schlegen an dem karfritag mit dem manigvaltigen liden und würde(n)t gelútret in dem für götlicher minn **U**nd also hútt an dem frölichen österlichen tag sind gelútret und gezieret und geglori[470]ficiert das sy lúchtent un(d) glentzent als die edlen margarithen und also ist diser tempel her(r) **S**alomonis wider uff gebuwen mit dem gewalt des vatters mit der wýßhait des suns und mit der süssen minn des hailigen gaistes und haind inn durch schmelzet mit dem rot guldinen clarificierten blüt xpī **H**útt so hat der himels vatter alle minnende mitlidendi hertzen geladet mit dem kúnglichen tempel sines ain gebornen sunes das sy rúwint und sich naigint uss iren gemahel und geminten in disem rúwigen österlichen zit **H**útt ist die menschain xpī beclaidet und gezieret die an dem hailigen crútz nackent und blöß hanget vor allen sinen vigenden un(d) die hat der himelsch vatter also hútt geglorificiert mit dem [471] claren sunnen glast siner götlichen clarhait **D**as er also lúchtet und glentzet **O** und wärint alle gräsli die uff ertrich sind ain iegelichs ain clare sunn das wär als ain schatt und ain finstri nacht wider die clarhait **Z**ü dem andern mál so hett er in(n) beclaidet mitt untödemlichait unlidbarkait dz er niemer tötlich noch lidbar wirt **Z**ü dem dritten mal so beclaidet er in(n) mit behender schnellikait das er ist in ainer stund im himel und uff ertrich wa er wil in aller gewychter priester hennd und in allen got minnenden hertzen mit siner götlichen clarificierten menschain das er vor nit enwas mit siner tödemlichen menschain **Z**ü dem vierden mal so beclait er in(n) mit clainfüger subtilikait das er subtilich ze beschlossner tür in kam zü sinen [472] iungern **H**útt ist der frölich ostertag das sich die lerch un(d) die nachtgall mit süssen stim(m)en frölich gefröwt haind das die hoh götlich mayestat die die menschain xpī geblúmt und geziert hat mit der finen adellichen waut siner hohen götlichen trinität **H**útt ist der hoh österlich tag das die vier element gefröwt haind **H**útt so siecht man die sunnen mit spilender fröd uff gon und das ist die gewar sun(n) der hohen gothait die da erlöschen was an dem hailige(n) fron crútz in aller menschen hertzen **W**on(n) allain in der wirdigen müter gottes **U**nd die ist die sun(n) der gerechtikait die also hútt wider erlúchtet ist mit götlicher fröd und das was das betrúpt hertz siner kúnglichen müter maria und das gestirn aller siner userwelten frúnden un(d)

---

<sup>192</sup> Großgeschriebener Anfangsbuchstabe, aber nicht rubriziert.

die vinstren [473] wolcken des lufftes und das wäre(n)t ungelöbige hertzen  
 Hútt so fröwt sich alles ertrich das sich da erschútt an dem hailigen karfritag  
 von mitliden des schöpffers un(d) das erzittret hútt mit iubilierend(er) fröd **Do**  
 xpūs uss dem grab so gewalteclich und so frölich uff das ertrich tritt **D**iss ist  
 das gewicht ertrich der kúngclichen magt marien und von allen sinen  
 ußerwelten frúnden **D**ie sich also hútt so lieplich iubilierent un(d) fröwent mit  
 der frölichen urstendi xpī **H**útt ist der tag das die zart minneclich winreb xpūs  
 wider gegrúnet hett die da gepflantzet und gezwýet was in dz min(n)eclich  
 paradís **U**nd in den wolgeschmackten wingarten des mägtlichen hertzen marie  
 und hett getrott vierd halb und dryssig iär die ist als hútt wider grúnent [474]  
 und blüyent worden als ain grünes zwyg und als ain blüyendes mayenris **U**nd  
 ain wol schmeckendi fruchtberendi winreb die úns da brächt hāt den süssen  
 zipper truben von zipper uss dem wingarten engadi von dem wir sond gespist  
 werden das wir also trunken werdint das wir únsel selber vergessint **H**útt ist  
 der frölich österlich tag das xpūs sin kúngliche müter maria frölichen gegrúzt  
 hett **Do** er zū ir sprach got grútz dich min liebi müter ich und du sind ewenclich  
 erstanden von dem tod gegrúzet syestu ain fröliche niesserin miner götlichen  
 clarhait nun und iemer ewenclich **G**egrúzet syestu ain uff enthalterin aller  
 creaturen **M**aria die wirdig müt(er) [475] gottes fiel zū den fússen xpī **S**y sprach  
 gelobt und geeret syestu himelscher vatter und ain geborner sun und zarter  
 gemahel min das du die menschai empfiengt von minem lib mitt dem du alles  
 menschlich kún erlöst hest von dem ewigen tod der helschen pin **H**útt ist der  
 hailig österlich tag das die lieb zart maria magdalena iren userwelten zarten  
 gemahel xpī in dem grab gesúcht hett den sy lebet minnet den hatt sy nu tod  
 gesúcht und do vand sy zwen engel sitzen in dem grab die sprächen zū ir also  
**M**aria was wainestu den du süchest der ist nit hie er ist erstanden von dem tod.  
 Sag<sup>193</sup> petro und den brüdern sin das xpūs ir maister und herre frölich erstanden  
 sy **S**y nam sich des engels red nit vil [476] an. sy sücht den engel des größen  
 rātes. **H**ie ist ain frāg wārum(b) sich maria also schnelleclich von dem **E**ngel  
 karti und sy doch wol sah das sy wirdig personen wāren die von got dar wāren  
 gesannt **D**azū wirt geantwürt sy sah das die engel uff stúnden **W**on sy sahen  
 das die wirdig person xpī hinder maria stúnd und sy gedächt in ir gemüt **W**er  
 mag da komen. das diss wirdig personen gegen im also uff stond und sy kert  
 sich schnelleclich um(b) und sah hinder ir ston in ains gartners wys **U**nd sy  
 sprach zū im. **H**ast mir min her(r)en genommen so sag mir bald wā er sy  
 kom(m)en ich wil in dannen tragen und diss redt maria nit darum(b) **D**as sy inn  
 liblichen möcht targe **S**y rett [477] es uss der brinnenden min(n) so sy hett zū  
 xpō **E**r nampt sy dry stunt maria und daby so bekannt sy in won die wortt die

<sup>193</sup> Großgeschriebener Anfangsbuchstabe, aber nicht rubriziert.

er geredt die wären gewonlich in irem hertzen Sy fiel zü den füssen sin und wolt in an gerüret han Und sprach nit rür mich an Maria du müst min gothait ee verston Hie ist aber ain frag wår um(b) sich xpūs maria erzogt in aines gartners wys darzü so wirt geAntwürt das geschach um(b) fünff sachen zü dem ersten das der gartner an im hett Er um(b) zünt sinen garten Zü dem Andern mal Er<sup>194</sup> rüttet us als unkrut und leit es zü ainem huffen zü dem dritten mäl er verbrennet es Zü dem vierden mal und säyet in das güt ertrich güten somen Zü dem [478] fünfften mal Der güt som bringt hundert faltige frucht und dise fünff ding hat xpūs och volbracht an maria Zü dem ersten mäl Er hāt um(b) zünt das paradīs ir sel und den garten irs hertzen in gezwungenhait ir fünff sinn und ir dry krefft der sel und all ir sinnlichen begird von aller manigvaltikait in dz blöss ainig ain der hohen gotthait Zü dem andern mal so hett er us gerüttet mit der bittren rūw irs hertzen nesslen braumen distel und alles unkrut und das ist alles das sy mit worten oder mit werchen oder mit gedennen wider in ye hāt geton Zü dem dritten mal so hat er es verbren(n)t in der hitzigen andächt irs hertzen die sy zü im hat Zü dem vierden mäl so hett [479] er ir gesaÿet in das hert rich irs hertzen sin ewig wort won als sy der ewangelist nempt ain wib das ist och ain wåres urkünd Das sy schwanger worden ist des ewigen. wortes des vatters gaistlichen das maria die müter gottes empfieng liblich Zü dem fünfften mal so hāt diser güter som hundert faltig frucht bracht in dem garten irs hertzen mit volkomenhait aller tugent won als man von ir list das sy zü siben mælen erhaben ward an dem tag in dem lufft von den engeln untz dz sy ir siben zit mit inen gesprach Und das ist ain gewåres urkünd das sy hie in zit an vieng schniden die süssen frucht der gothait die sy nun eweclich nüsset Hútt so ist der turtel tuben stim(m) gehört und das ist [480] die lieb userwelt magdalena die ain kúnderin ist gewesen der frölichen urstendi xpī Won er ir zü dem ersten erschain nach siner kúnglichen müter maria un(d) das hat sy frölichen kúndet<sup>195</sup> den trurigen iungern xpī und hett sy erfröwet Hútt so ist der frölich österlich tag das xpūs ze beschlossner tür in kam da die iunger gesamnet wären und er grüzt sy frölich und sprach frid sy mit úch nit fürchten úch Sehent min hend und min füss das ich es bin und frölich von dem tod erstanden bin Sehent das uff geton hertz min da sol eweclich úwer rūw sin der da an dem nacht mal sprach úwer hertzen werdent betrübt und der hett sy hútt frölichen erfröwt und alle trurikait von inen genomen und sprach ze inen nem(m)[481]ent den hailigen gaist Wen ir bindent das der gebunden sy un(d) wen ir enbindent der sol Eweclich frÿ sin Gond in die welt und bredigent das Ewangeli und was ir

<sup>194</sup> Großgeschriebener Anfangsbuchstabe, aber nicht rubriziert.

<sup>195</sup> Zwischen *frölichen* und *kúndet* befindet sich ein Zwischenraum. Vermutlich eine Korrektur.

von mir gesehen und gehört haind un(d) darnach so kum(m)ent zü mir in min himelschlich vatterland Hútt ist der tag das sich die menschait xpī frölich gefröwt hat die da us gesendt ward an dem frölichen wyhennächtlichen tag uss dem tieffen abgrund des vätterlichen hertzen Von siner himelschen wanung Und hat an sich genomen únsér tódemlichen menschait Darum(b) das wir tailhafftig wúrdint siner gothait und er ward in die tüchli gewunden und ward in die kripp gelait für den esel und daz rind Darum(b) das er hin nem ún[482]ser sichlichait und er hat vierthalt und drissig iär úns gedienet In armüt in hunger in túrst in verschmácht in ellend und das hat er alles durch únsérn willen gelitten und er hat sich als hútt an disem österlichen tag zü dem ertsen mál in siner menschliche(n) natur do sin blüyendi menschhait als hútt clarifiziert ward mit siner hohen gothait Hútt so sölent sich och billichen fröwen alle minnendi hertzen die die kinthait und die menschait xpī gemin(n)et haind und ain státtes mitliden mit im gehept haind Hútt ist der hohzitlich österlich tag das xpūs vor der urstendi gesprochen hett Ich bin arm und arbaite von minen iungen tagen zü dem hat also hútt der himelschlich vatter gesprochen Min sun du [483] bist allwegen mit mir un(d) alles das min ist das ist din und das din ist min und er hett im uff entschlossen die verborgnen hörd und die himelschen schátz der hohen gotthait Das wir diss frölich zit der gnaden also frölichen in minn und in tugent verzerint Des helff úns gott in siner ewigen glori und ere Amen

Maria magdalena belaib bý dem grab und sah zwen engel by dem grab mit wyssen claidern ainen zü dem hopt den andern ze den füssen Sy sprachen frow warum(b) wainestu und nigten mit dem hopt Sy sprach ich wain das die iuden minen her(r)en uss dem grab genomen haind und waiss nit wa sy in gelegt haind und sy gieng wider von dem grab und sy sah unsern her(r)en [484] mit ainer grab schufel als ainen gartner un(d) er sprach frow wz wainest du oder was süchestu Sy sprach herre hāstu in anderswa hin geleit und sy kert sich wider zü den engeln und fragt sy wem sy hettin genigen mit dem rüfft unser herr un(d) sprach maria Do kert sy sich gen im und kant in an der stim(m)e und viel nider zü sinen füssen und sprach maister Únsér herr sprach du solt mich nit an rüren und sprach gang zü minen brüdern und sag in ich welli in den himeln faren zü minem vatter der úwer vatter worden ist zü minem gott miner menschait und zü úwerm gott und do die frowen aber zü dem grab giengent und maria magdalena mit in Do bekam in unser her(r) und sprach zü in avete das ist sind wol gemüt Ich bin es der durch [485] úch tod ist und wil nit me sterben Sy vielen nider für in und kusten sin hailigen füss mit grössem andaucht

O lieber her(r)e ihú xpē als Maria Magdalena dich wainent sücht in dem grab also bitt ich dich das ich min vergangen zit von grund mins hertzen und die

sünd und misstāt **D**ie ich begangen han och waine und rúwe und laid darumb  
hab un(d) als du ir rüfftest un(d) zü sprächt **A**lso rüff mir armen súnder och  
und sprich mir zü und send mir och den hailigen engel der mich beware vor  
allem úbel libs und sele und das ich och für dine hailige füß valle mit gantzer  
demütikait und dir danki alles des das du um(b) mich armen súnder gelitten  
hăst und als du sprächt zü den frowen **I**ch wil nit me sterben [486] **A**lso behüt  
mich och erbarmhertziger gott vor dem ewigen tod das ich des niemer sterb  
sunder eweclich mit dir lebe **A**men

[Miniatur: ‚Himmelfahrt Christi‘]

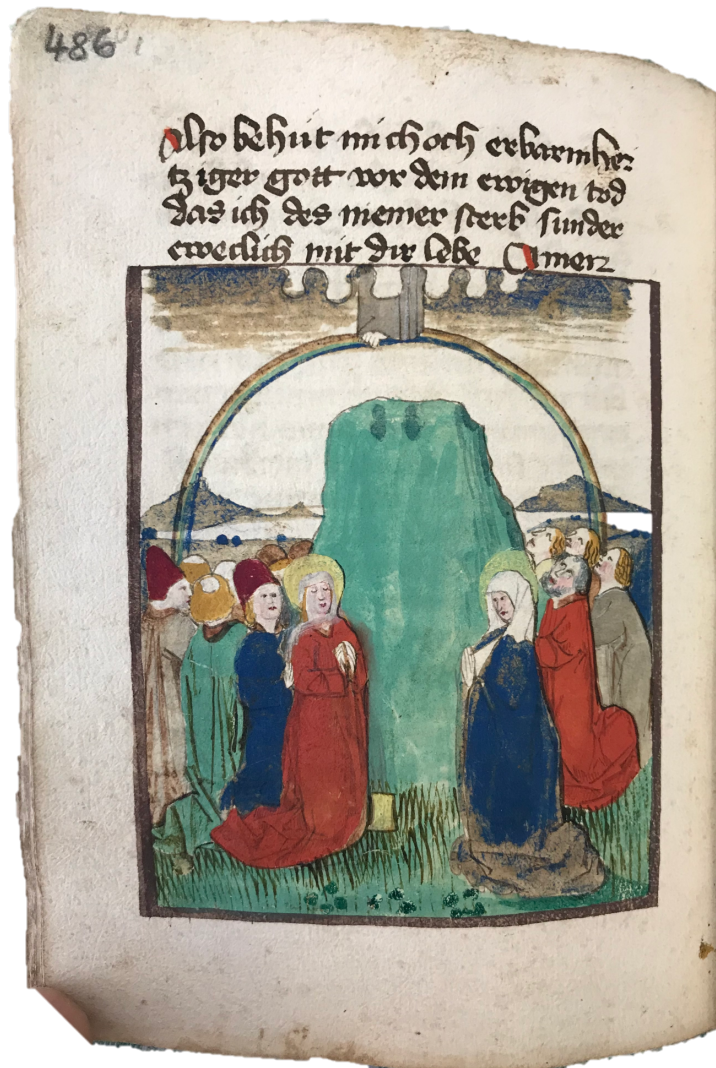

[487] **Ú**nser<sup>196</sup> her(r) hiess dz sy sich somnotint uff dem berg oliveti und kam(m) únse frow und die iunger und hundert un(d) zwaintzig mannes nam(m)en **D**o erschain in unser herre und nâh vil süsser red un(d) lere an ir angesicht ward er uff gon und bedackt in ain klain wolke das sy in nit me sahent er fûrt och mit im die er uss der vorhell genomen hatt und tailt die nach ir werd in die kör der engel **U**nd als die iunger úber sich sahen **D**o kamen zwen engel in wyssen claidern und in mannes gestalt und sprachen ir man(n) von galilea wes stond ir hie **S**ehent in den himel **I**hesus der von úch ist in den himel gefaren der ku(m)pt wider an dise statt ze richten úber lebendig und tot wil yecliche(n) sinen lon geben in himel und [488] in hell als er verdienet hât

Lieber her(r) ihú xpē **I**ch bitt dich das du mich armen súnder wellist tailen in die kör der engel im himel nit nâch miner wird und verdienen sunder nach diner grössen erbarmhertzikait und lon mir nit nach minen wercken sunder nâch dinen gnaden un(d) göttlichen werden

**O** Du hoh gelopter gottes sun du verclärter wol geborner durch zierter ritter aller tugenlichoster herr ihú xpē **M**in hertz ermanet dich wie du hútt hin ziehest mit dem rot guldinen stûrm fenli diner zierlichen ritterschafft aller erlôsten selen uss der vorhell und uss dem fegfür und aller erwelten kinden in diser erden mit denen du hin zúhest durch das tal **I**osaphat hin uff den [489] berg oliveti da du nach vil süssen sprúchen und getrúwen ler und underwysung und trostlicher sterkung **D**iner erwelten kinden mit uff erhabnen henden dich uff erhept gegen dem himel mit din selbs götlichen mayenkrafft mit um(b) gebung ains lutren wýßen wolken in dem du sittlich uff giengt in angesicht diner wirdigen mûter un(d) aller diner lieben kinden und úberwelten. **E**ya der hohen úber mässigen frôdenrichen uff fart diner götlichen magen krafft in der du dich selbs in aigner clarhait und schneller subtilikait un(d) clainfüger behendikait wârt erheben von der nidri in din selbs hohait mit diner verclärten menschait und mit diner hohen gothait **O** himelscher kúng der eren **E**ya wie tringist du hie durch die hohen him(m)el uff mit diner zierlich[490]en **E**ngelschen gesellschaft **O** hohi edli vergottendi wirdigi sel ihú xpī wie so in unmässiger clarhait veraint mit der zarten lutren menschait du hútt uff gäst **S**o mit grösser zierlicher schonhait dins costbaren verdienens **O** hoh gelopti erlich uff fart in kúngclicher her(r)schafft du dich hútt erzôgst du schönner geblûmter gottes sun mit gewaltigem uff faren in süssem widerklingenden gesang der hailigen engel und in iubilierender frôd von allen menschlichen gaisten **O** gegen dir zúhet hútt us der kaiser aller richen **E**ya er tût dir uff dz fürsten tûm kaiserlicher wirdikait das eweclich ze besitzen **A**ch wie mit so unbegriffenlicher **E**wiger

---

<sup>196</sup> In der U-Initiale steht mit schwarzer Tinte *bi* geschrieben, evtl. ein irrtümlich eingetragener Wortanfang?



minn din himelscher vatter dich sinen kúngclichen ain gebornen sun was empfaen und [491] mit vätterlicher liebi dich **Um(b)** vahren und setzen zü der gerechten hand siner götlichen mayen crafft im ebengelich iemer ewenclich des nig ich demütenclich diner loblichen erwirdigen uff fart in die himelschen fröd in der wir alle meschait **Durch** dich sind widerbracht und du aller minnsamester her(r) und getrúwester únsen bruder ihú xpē úns dine arme geschwústergit und verlorne schäffli **Dinem** ewigen vatter wider hast geantwürt **Ach** da selbs behalt mich ewenclich dúrch din loblichen himelfart dz ich dich minen gott un(d) her(r)en werde loben yetz und yemer ewenclichen **Amen**

**Diss** ist wie sich die iunger hieltent nach der uff fart ihú xpī nach dem und der ewig gottes sun voll[492]bracht hat sin werck **Darumb** er in zit kum(m)en was **Und** sin lieplici gegenwirtikait den iungern hatt underzogen an dem uff fart tag do giengent die iunger von dem berge wider gen iherusalem und liessent sich in sechserlay wis bis in der gaist gottes an dem pfingsttag ward gesan(n)t **Zü** dem ersten wan sy sich von aller welt geschaiden hettent und da in ir fröd und trost gezuket was do tätent sy ainen vollen ker(r) von aller usswendikait der zit in ir selbes inwendikait **Wan(n)** in diser gantzen welt in tod was alles das in lust und fröd in zit bringen mocht **Zü** dem andern satztent sy sich in ain verwegen ir selbz ze sterben ald zü genesen wie go wölte **Das** anders sin will volbrácht wúrd wie es gott von in haben wölt **Darumb(b)** [493] als sy xpūs gehaissen hett **Do** giengent sy wider in die statt under ire vygent das sy da wartatint was der wille gottes von inen haben wolt **Doch** geschach dises nit on grösse vorcht **Zü** dem dritte(n) bildetent sy der süssen ler xpī nāh wie sy die so gar groblich uff genomen hettent und sin lieplichstes bild und sini wort **Der** sy so gar unwirdig warent ze høre(n) und ze sehen so liederlich hettent gelaussen hin gon des würdent sy sich selber in(n)eclich **Darumb(b)** mit ainem stätten bittren griss gram(m)en ir selbz hertzen zü dem vierden mal noment **Sy** für sich das ir gemin(n)ter süsester maister im selbs in allen dingen so gar was us gegange(n) das er sich selber nie gesúcht in allem sinem leben **Und** das er [494] gesprochen hatt der mir nach komen well der verlogne sin selbs **Und** hie mit giengent sy in sich selbs und bekantent clarlich das sy dem waren gelassen noch so fer(r) warent un(d) das sy die bilde der menschait xpī ze natúrliche(n) hattent genomen und alsus noch denn in ir selber stúdent noch so von forchten und natúrlichem gelásse nit entledigot warent des sy sich gabent mit liechtem bekennen schuldig in ainem gantzen irs selbs misfallen **Zü** dem fünfften kertent sy us der bekantnus ir gebresten mit voller begird und inwendig zü irem lieben maister und begertent von grund irs hertzen **Das** in ir unordenlichen begird und groubhait und ire grösse unvolkumenhait wurde vergeben und in in erlöst wurd alle vorchte un(d) [495] natúrlichen süchen in inren bilden siner menschait und

alles dz uff genomen würde **Das** sy ierent wär aines waren gelässes des begertent sy von gantzem hertze(n) wan(n) an das gelob ich nit dz sy den hailigen gaist darnach iemer hettint empfangen **Zü** dem sechsten **Do** satztent sy sich in ain miltes getrüwen was in ir liebster maister hetti gehaissen ze helffen und ze troste ze tün das er das stätte wurde halten **Darum(b)** wär das si sich unbesorget liessint in aller nottürfft und das sich die gantz welt wurde wider sy setzen so behalff in doch dz gröste getrüwen das sy zü dem milten hertzen irez süssesten maister hettent das sy der versäh und von im nit gelässen würdint wie doch das die bekantnus irs gebresten sy etwas [496] satzti in forcht das sy villicht ir ungelässenhait engelten würdi(n)t **Dise fräg** **Sid** nun in disen die gantz welt tod was un(d) sy begerte(n)t das in alle natürlichait benomen würde von dem götlichen liechte warum(b) ward in do der hailig gaiste vor gespart und nit ze hand nâch der uff fart gegeben **Die Antwürt** **Es** enist nit ze gelobe(n) das der hailig gaist den iungern vor gespart würd bis an den pfingst tag mer vor der uff fart empfiengent sy in un(d) noch me nach der uff fart wan(n) als vil sÿ ie me sich selber bekan(n)tent als vil trang ie me und ie me der gaist gottes in sy und wan(n) aber sÿ nit gantz ir selbz ledig waurent darum(b) gab sich in och der hailig gaist alsus wärlich nit gesichteclich noch in sinen gäben als an dem pfingsttag do [497] in geschach ain wares entletge(n) ir selbs nit das sy vor gantz gelässen wärint **Ee** sy den gaist gottes empfiengint mer wann die götlich krafft in in enzünt wz ain williges wider streben die nam da über hand und entledgete sy mit irs selbs gantzen in tragen uss ir selbs natur **Und** fryhait sy mit in selber als in der nachgenden bredi ist geschriben und alsus ist es ze merken von den iungern und von allen iren gelychen nach dem un(d) **Sant Gregorius** spricht als vil die götlich krafft in uns wachst also vil nimpt unser gaist ab **Denn** so nement wir gantz in gotte zü so wir habent gantz ab genomen in uns selbs das verlih uch und mir der vatt(er) und der sun und der hailig gaist **Amen** [498]

[Miniatur: ‚Ausgießung des Heiligen Geistes‘ (Pfingsten)]

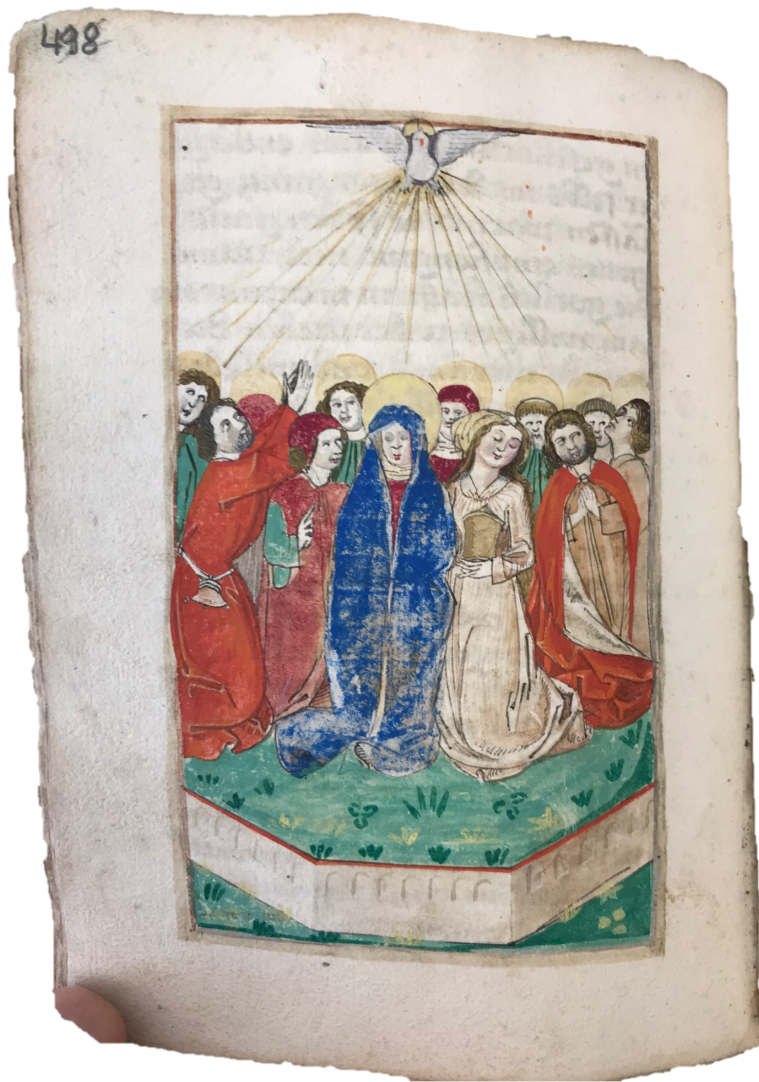

[499]

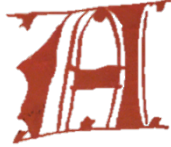

<sup>197</sup>n dem pfingstag am morgen ze tertz zit do die schar was an irm gebett do kam ain geswinder wind und ain süsser luft in das hus da sy inne wärent und erschinen fürin zungen ir ieclichem frowen und mannen uff ir hopt und zü hand würden sy erfüllet des hailigen gaistes un(d) redtent alle die

sprachen die in der welt wärent und zü hand stünd **S**ant peter uff und brediget wol fünff tusent menschen dz volck luff gemainlich zü und wundert das sy vor als in grössen sorgen beschlossen waren vor den iuden und nu als unforchtlich predigent den globen únsers herren ihesu xpī

**O** hohi allmächtikait durch [500] din götlichen krafft und vätterlichen miltikait du dinen hailige(n) gaist her ab gesendet hast den betrüpten baitenden dinen erwelten kinden die so gar verwaiset und verellendet warent disen **C**ostbaren hort und süssen tröster du vor dinem hinschaiden inen gelopt hattest mit vil diner süssen sprúchen und wyssagung inen den hailigen gaist ze senden **E**ya also ist hútt der tag in dem din gelúpt ist volbrácht und volkomenlich erfült und dine verwaiseten trurigen kind so úbernátúrlích un(d) so süssenelích getröst sind das sy in der zü kunfft dins gaistes alles ires lidens tusent faltenclichen ergetzt würdent und erlúchtet das alle dine wort und süsse ler inen erst recht bekannt und offenbar ward dz inen vor vergessenlich was [501] **O** hailiger gaist durch diss din hoh úberwesenlich würcken **S**o erhör mich armen rüffenden súnderinen zü diner gnad verschmách nit min begird uff ze richten ze dir **E**ya du hohi sun(n) der gerechtikait och der erbarmhertzikait **D**u tring hútt uff un(d) láß dinen schin der götlichen gnad fliessen in min hertz und in min sel **D**as die ze enzúnden mit götlicher minn in der alle andre minn die nátúrlích syg in mir erlösch **O** du süsses min(n)band bin mich. zúh zü dir also krefteclíchen das mich fürbas weder lieb noch laid von dir geschaiden mug **O** ewiges liecht erlúcht mins hertzen finsternus mit diner götlichen wyßhait also das ich alle mine wort und werck volbring mit wysem underschaid das sy dir gevallint [502] **V**erlih mir din gaben clarlich ze bekennen in den siben faltigen gäben und gib mirs demútenelích ze empfahren un(d) danckberlich wider uff ze tragen und fruchtbarlich ze messen **A**ch gib mir die gab diner götlichen kunst in ir betútung lernen ze beken(n)en dem nach ze betrachten und ir wysung un(d) lerung nah ze volgen **E**ya verlih mir die gab der götlichen vorcht die mich behút vor dem fál der sünden un(d) vor allem dem das mich diner gnad gehindren und geirren mag **O** und all ander gaben gib mir die mich beraitint ze allen tugenden **O** süsser lieplícher tröster kum(m) hútt mit diner götlichen sterki mich in allen tugenden die ze volbringen un(d) dár [503] in ze volhar(r)en bis

---

<sup>197</sup> Fünfzeilige Initiale.

an das end mins lebens da ich in warer sicherhait von dir empfangen werd und hie in zit und dōrt in ewikait mit dir ewenclich veraint werd **A**men

**O** Lieber her(re) ihú xpē **I**ch bitt dich das du mir och dinen hailigen gaist wellist senden das min zung och enzündet werd mit dinem götliche(n) für das ich din lob und e(e)r da mit gesprechen mug und als sant peter vil volcks bekert zü dem globen also bitt ich dich lieber her(r) das du mich armen sūnder och bekeren wellist von minem sūntlichen leben **S**under mir ain sōlich leben gebist das ich in diser kúrtzer iomrigen zit also lebe das ich min sūnd also bessri und bütze un(d) din hulde erwerb und verdieni das ich von dir niemer geschaide(n) werde [504]

**Welcher mensch wol betten wil der sol an haben rüffen zü gott dem hailigen gaist zü dem ersten vor allen dingen und sol sprechen also**

**V**eni Sancte<sup>198</sup> spiritus v(ersus) **K**um(m) hailiger gaist<sup>199</sup> **D**u erbarmhertziger gott zü miner sele mit diner hailsamen lere und wýse mich den weg der gerechtikait **A**nzünd min hertz mit dem für diner liebi **U**nd behalt mich in dinen gnaden. kum(m) zü mir du brunn der tugent **D**u richer schatz götlicher minne. erlucht mir min hertz das ich dich erkenn und in mir belib cristenlicher glob **O** du trost der betrübten du waichmacher der türren hertzen. kum(m) zü mir un(d) mach dir ain wonung in minem hertzen **V**erlih mir wyßhait dā mit [505] ich dinen willen verbring un(d) gib mir rechten andächt und vernunft in minem gebett das ich hailsam werde hie uff erden und also min leben dir ain wolgefallen sy

**S**piritus sancte deus et (cetera) **O** Hailiger gaist und du ewiger gott du tröster aller betrübten hertzen **I**ch lob dich ich e(e)r dich und sag dir danck diner götlichen minn und besunder barmhertzikait die du an mir armen sūnderinen manigfaltig erzaiget hast bis gnädig du brunn der gnaden und erzaig hin für an mir din liebi und din gütikait als du bis her hast geton dz ich werd ain sāliger andächtiger mensch und nit sterbe in minen sūnden **A**men

**K**um(m) hailiger gaist und erfüll die hertzen diner ge[506]trúwen und enzünd in inen das für diner liebi der du durch manigvaltikait der zungen gesamnet hast die dient in ainikait des cristenlichen globen. geruch och uns ze samen samlen in die ewigen sālিকait da wir dich ewenclich inne lobent

---

<sup>198</sup> Großgeschriebener Anfangsbuchstabe, aber nicht rubriziert.

<sup>199</sup> ‚Veni sancte spiritus‘ wird als Sequenz (vgl. Cantus ID ah54153) in der Messe am Pfingstsonntag und als Antiphon (vgl. Cantus ID 005327) in den meisten Horen an Pfingstsonntag und weiteren Tagen der Pfingstwoche verwendet.

Hie vahent an die Siben zit von dem hailigen gaist

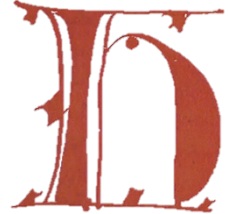

<sup>200</sup>Err tû mir uff min lefftzen und minen mund das er kûnd  
din lob<sup>201</sup> Got sieh min hilff. Her(r) il mir ze helffen<sup>202</sup>  
Ere sy dem vatter und dem sun und dem hailigen gaist  
Als er wz von anvang und nun und all weg von ainer welt  
zü der andern welt Amen

Der ymnus

Kum(m) beschöpffer hailiger gaist visitier die gemüt  
[507] diner glöbigen erfüll mit diner obresten gnaden die hertzen die du hest  
geschaffen Der du wirst gehaissen ain tröster ain gab des obrosten gottes ain  
lebender brun(n) ain für ain liebi un(d) ain gaistlich salb Du bist siben faltig  
an der gaben du bist ain finger der gerechten hand gottes du hest ordenlich rich  
gemachet die kelen der zwölff botten mit der gelobten red des vatters Enzünd  
das liecht in únsern sinnen in gûß din liebi únsri hertzen sigestu stercken  
ewenlichen mit der krafft die kranckhait unsers libes Trib von úns fer(re)  
enweg den vigend und gib úns dinen frid schier das wir vermiden alles böses  
so du fürer also úns für gast Gib die lon diner fröden gib die gaben diner gnaden  
entrenne die band des [508] krieges zü bind die gelúbt des frid Gib das wir  
wissent durch dich den vatter und das wir erkennen den sun und das wir globent  
alle zit das du syest ain gaist ir beder Du hest erfüllt mit diner gnaden die hertzen  
die vor mals sind gehailget nu verzih úns únsere súnd un(d) gib o stille zit Lob  
sy dem vatter mit dem sun und och dem hailgen gaist und der sun send us die  
gnad des hailgen gaistes Amen

Antiffe(n). Kum(m) hailger gaist

Sälig ist der man der nit abgât in den raut der úblen und in dem weg der súnder  
nit stünd und in dem stül der schelmigen nit sass Sunder in der gesetzt des  
herren ist sin will und an sin gesetzt gedenckt er nacht un(d) tag Und wirt als  
das holtz das [509] gepflantzet wirt nebent dem hinlof der wasser das sin frucht  
git in siner zit Und sin blatt nit enweg flúst und alles das er tüt dz gat im wol  
Nit als ir úblen nit als súnder also<sup>203</sup> der stob den der wind wirffet von dem  
anlút der erden Warum(b) erstond die úblen nit an dem gericht noch die súnder  
in dem raut der rechten<sup>204</sup> Ere sy dem vatter und dem sun et (cetera)

---

<sup>200</sup> Siebenzeilige Initiale.

<sup>201</sup> Ps 50, 17.

<sup>202</sup> Ps 69, 2.

<sup>203</sup> Nach *also* steht (durchgestrichen?) *sto*.

<sup>204</sup> Ps 1.

**Antiffe(n)** **Kum(m)** hailiger gaist erfüll die hertzen diner glöbigen un(d) enzünd in inen das für diner liebi wan(n) du von manger spräch hest gesamnet lút in die ainung des cristenlichen globen alleluia alleluia<sup>205</sup>

**V(ersus)**. Send us dinen gaist und sy werdent beschaffen **Und** du wirst ernúwren das antlút der erde(n)<sup>206</sup>

**GE**segnot ist der her(r) gott von ysrahel won er uns gesehen hât und hett ge[510]machet erlösung sines volkes **Und** er hett uff gerichtet in úns dz horn sines hails in dem hus david sins kindes **Als** er gesprochen hât durch den mund der hailgen wyssagen die von dem anvang der welt sint **Das** er úns gâb hail vor únsren vigenden und von allen den henden die úns hassent **Zetünd** erbarmhertzikait mit únsren vâttern und das er gedenck siner hailigen gelúbt **Den** aid und die wâren gelúbt die er sah und schwür und gelobt abraham únsrem vatter das er úns sich selber wett geben **Darum(b)** das wir on vorcht von den handen von únsren vigenden erlösest und im dienen **In** hailikait und in gerechtikait vor im all únsrer tag **Und** du kind wirst gehaissen ain wyssag des höchsten du wirst vor gon dem antlút des her(r)en ze beraiten im [511] sinen weg **Und** ze geben die kunst des hails sinem volk in ablâs ir sünden **Durch** die audren der erbarmhertzikait únsers gottes in denen er úns gesehen hat uff gegangen und entsprungen von der höhi **Erlúcht** und erzög dich denen die in der vinsternus und in dem schatten des todes sitzent ze keren únsrer füss an den weg des frides **Er** sy dem vatter un(d) dem sun et (cetera)

**Antiffen** Ich wil úch nit waisen lassen alleluia **Ich** gon un(d) kum(m) wider zü úch alleluia und úwri hertzen werdent sich fröwen alleluia<sup>207</sup> **V(ersus)**

**GO**tt beschaff in mir ain raines hertz und ainen rechte(n) gaist ernúw in minen audren<sup>208</sup> **V(ersus)** Nit wirff mich von dinem antlút **Und** dinen hailige(n) gaist nim nit von mir **V(ersus)** Gib mir wider dines hailes fröd und [512] mit dinem fürstlichen gaist so stercki mich<sup>209</sup> **Vatter** únsrer et (cetera) **V(ersus)** Nit lait úns in bekorung. **Sunder** lös úns von úbel **Amen V(ersus)**. **Her(r)** erhór min gebett **Und** min rüff kom(m) zü dir

---

<sup>205</sup> Vgl. *Veni sancte spiritus reple tuorum corda fidelium et tui amoris in eis ignem accende qui per diversitatem linguarum cunctarum gentes in unitatem fidei congregasti alleluia alleluia*. Dom. Pentecostes, First Vesper, Antiphon, Cantus ID 005327.

<sup>206</sup> Vgl. *Emitte spiritum tuum et creabuntur et renovabis faciem terrae*. Nachgewiesen als Antiphon, Responsorium und Versikel, hauptsächlich am Pfingstsonntag (Cantus ID 002643 u.a.).

<sup>207</sup> Vgl. *Non vos relinquam orphanos alleluia vado et venio ad vos alleluia et gaudebit cor vestrum alleluia*. Dom. Pentecostes, First Vesper, Antiphon, Cantus ID 00394.

<sup>208</sup> Vgl. *Cor mundum crea in me deus et spiritum rectum innova in visceribus meis*. Dom. 1 Quadragesimae, Lauds, Antiphon, Cantus ID 001929. Auch Ps 50, 12.

<sup>209</sup> Vgl. Ps 50, 13.



### Bett

Wir bitten dich her(r) dz du úns milteclichen in gúßist die gnad des hailige(n) gaistes die úns machi wainen únsere súnd das wir den ablás verdienin Durch únsere her(r)en ihesum xp̄m dinen sun der mit dir lebt und richsnet in ainikait des hailgen gaistes gott durch alle die welt der welten Amen

### Die prim

HErr erzög úns din erbärmd Und gib úns din hail Gott sieh in min hilff. her(r) yl mir ze helffen Er sy dem vatter und dem sun et (cetera)

### ymnus [513]

Kum(m) beschopffter hailiger gaist visitier die gemüt diner globigen erfüll mit diner obresten gnaden die hertzen die du hest geschaffen Der du wirst gehaisen ain tröster ain gab des obresten gottes ain lebender brun(n) ain für ain liebi und ain gaistlich salb Du bist siben valtig an der gaben du bist ain vinger der gerechten hand gottes Du hest ordenlich rich gemacht die kelen der zwölf botten mit der gelobten red des vatters Enzünd das liecht in únsere sinnen in gúß din liebi. únsere hertzen sygestu stercken ewenlichen mit der krafft die kranckhait únsere libs Trib von úns fer(r) enweg den vigent un(d) gib úns dinen frid schier Das wir vermeiden alles böses so du fürer [514] also úns für gäst Gib die lon diner fröden gib die gaben diner gnaden entrenne die ban(n)d des krieges zü bind die gelübt des frid Gib das wir wissent durch dich den vatter und das wir erkennen den sun und das wir globent alle zit das du syest ain gaist ir beder Du hest erfüllt mit diner gnaden die hertzen die vormäls sind gehailget nun verzih úns únsere súnd und gib o stille zit Lob sy dem vatter mit dem sun und och dem hailgen gaist un der sun send us die gnad des hailgen gaistes

Amen

An(tifon). Kum(m) hailger gaist

HErr wer sol wonen in dinem tabernacul oder wer rúwet an dim hailgen berg Der in gät on mäsen un(d) die gerechtikait würcket Der die warhait spricht in sinem hertze(n) [515] der dekain úbel tüt mit siner zungen Noch sin nächsten nit úbel tüt noch kain scheltwort empfieng wider sinen nächsten Der böses ist worden ze núnt vor siner angesicht der aber gott fürcht der wirt geeret Der da schwert sinem nächsten und in nit betrúgt und der sin güt nit gab ze wüchren und nie kain gaub nam(m) über den unschuldigen Der das tüt der wirt niemer bewegt Er sy dem vatter und dem sun et (cetera) an(tifon) Kum(m) hailger gaist erfüll die hertzen diner glöbigen und enzünd in inen das für diner liebi wann du von manger spräch hest gesamnet lút in die ainung des cristenlichen

globen Alleluia all(eluia)<sup>210</sup> V(ersus) Send us dinen gaist und sy werdent beschaffen Und du wirst ernuwren das antlút der erden Vatter únsrer et (cetera) [516] Nit lait úns in bekorung Sunder lös úns von úbel Amen V(ersus) Got bestätge in uns Das du in úns gewürket hest Ich glob in gott vatter et (cetera) V(ersus) Gott beschaff in mir ain raines hertz und ainen rechten gaist ernúw in minen audren V(ersus) Nit wirff mich von dinem antlút Und dinen hailgen gaist nim nit von mir V(ersus) Gib mir wider dines hailes fröd Und mit dinem fürstlichen gaist so sterck mich V(ersus) Her(re) erhör min gebett Und min rüff kom(m) zü dir

#### Gebett

HErr die ingússung des hailgen gaistes rainge únsre hertzen und mach fúcht die niderkait mit der besprengung sins towes Durch únsrer her(r)en ih̄m xp̄m dinen sun Der mit dir lebt und rich̄net in ainikait des hailigen gaistes got. durch [517] alle welt der welte(n) Ame(n)

GOtt sieh in min hilff her(re) yl mir ze helffen Er sy dem vatter und dem sun und dem et (cetera)

#### ymnus

Kum(m) beschöpffter hailiger gaist visitier die gemüt diner glöbigen. erfúll mit diner obresten gnaden die hertzen die du hest geschaffen Der du wirst gehaissen ain tröster ain gáb des obresten gottes ain lebender brun(n) ain für ain liebi un(d) ain gaistliche salb Du bist siben faltig an der gaben du bist ain finger der gerechten hand gottes du hest ordenlich rich gemacht die kelen der zwölff botten mit der gelobten red des vatters Enzünd das liecht in unsern sinnen ingúß din liebi. únsri hertzen sigestu stercken ewenclichen mit der krafft die kranck[518]hait únsers libes Trib von úns fer(r) enweg den vigend und gib úns dinen frid schier das wir vermiden alles böses so du fürer also úns für gäst Gib die lon diner fröden gib die gaben diner gnaden entrenne die band des krieges zü bind die gelúbt des frid Gib das wir wissent dúrch dich den vatter und das wir erkennen den sun und das wir globent alle zit das du syest ain gaist ir beder Du hest erfúllt mit diner gnaden die hertzen die vor mals sind gehailget nu verzih úns únsrer súnd und gib o stille zit Lob sy dem vatter mit dem sun un(d) och dem hailgen gaist und der sun send us die gnad des hailigen gaistes Amen

An(tifon) Kum(m) hailger gaist et (cetera)

GOtt behalt mich in dinem nam(m)en und in diner tugent [519] richti mich

Gott erhör min gebett empfah mit dinen oren die wort mins mundes Wann

---

<sup>210</sup> Vgl. Veni sancte spiritus reple tuorum corda fidelium et tui amoris in eis ignem accende qui per diversitatem linguarum cunctarum gentes in unitatem fidei congregasti alleluia alleluia. Dom. Pentecostes, Antiphon, Cantus ID 005327.

frömd lút stündent wider mich un(d) die starcken süchtent min sel und sy satztent gott nit für ir an gesicht **S**ieh aber gott der hilfft mir und got ist ain empfaßer miner sel **W**ider ker das úbel miner vigenden und in diner warhait zersprait ich sy **M**itt willen opffern ich dir und lob dinen nam(m)en wan(n) er ist güt **W**ann du erlösest mich von aller miner arbit und mine ogen verschmähent mine vident **E**r sy dem vatter et (cetera)

**an(tifon)**

**K**um(m) hailger gaist erfüll die hertzen diner glöbigen un(d) enzünd in inen das für diner liebi wan(n) du von manger sprach hest gesamnet lút in die ainu(n)g cristenlichen globen **A**lleluia [520] alleluia<sup>211</sup> **V(ersus)** **S**end us dinen gaist und sy werden beschaffen **U**nd du wirst ernúwren das antlit der erden **V**atter únsrer et (cetera) **V(ersus)**. **N**it lait úns in bekorung **S**under lös úns von úbel **A**men

**Gebett**

**G**ott beschaff in mir ain raines hertz und ainen rechten gaist ernúw in minen audren **V(ersus)** **N**it wirff mich von dinem antlút **U**n(d) dinen hailgen gaist nim nit von mir **V(ersus)** **G**ib mir wider dines hailes fröd **U**nd mit dinem fürstlichen gaist so sterck mich **V(ersus)** **H**er(r) erhör min gebett und min rüff kom(m) zü dir

**Gebett**

**G**ott der du hest gelert die hertzen diner glöbigen mit der erlúchtung des hailgen gaistes gib úns in dem selben gaist die rechten ding ze verston un(d) úns fröwen all wegen von sines trostes **D**urch únsrer her(r)en [521] ihesū xp̄m dinen sun der mit dir lebt un(d) richsnet in ainikait des hailigen gaistes gott. durch alle welt der welt **A**men

**Zü der Sext**

**G**ott sieh in min hilff **H**er(re) yl mir ze helffen **E**re sy dem vatter und dem sun et (cetera)

**ymnus**

**K**um(m) beschöpffter hailger gaist visitier die gemüt diner glöbigen erfüll mit diner obresten gnaden die hertzen die du hest geschaffen **D**er du wirst gehaissen ain tröster ain gáb des obrosten gottes ain lebender brun(n) ain für ain liebi un(d) ain gaistliche salb **D**u bist siben faltig an der gaben du bist ain finger der gerechten hand gottes du hest ordenlich rich gemachet die kelen der zwölff botten mit der gelobten red des vatters **E**nzünd das liecht in únsrer sinnen ingúß din liebi únsrer [522] hertzen syest du stercken ewenlichen mit

---

<sup>211</sup> Vgl. Veni sancte spiritus reple tuorum corda fidelium et tui amoris in eis ignem accende qui per diversitatem linguarum cunctarum gentes in unitatem fidei congregasti alleluia alleluia. Dom. Pentecostes, Antiphon, Cantus ID 005327.

der krafft die kranckhait unsers libs **T**rib von uns ferr enweg den vigent und gib úns dinen frid schier das wir vermiden alles böses so du fürer also úns für gäst **G**ib die lon diner fröden gib die gaben diner gnäden entrenne die band des krieges zü bind die gelúbt des frid **G**ib das wir wisse(n)t dūrch dich den vatter und das wir erkennen den sun und das wir globent alle zit das du syest ain gaist ir beder **D**u hest erfúlt mit diner gnaden die hertzen die vor mǎls sind gehailget nun verzih úns únser sünd und gib o stille zit **L**ob sy dem vatter mit dem sun un(d) och dem hailgen gaist und der sun send us die gnad des hailige(n) gaistes **A**men

**G**Ott sieh in min hilff herr yl mir ze helffen **S**y wer[523]dent geschannt und sy scham(m)ent sich die min sel sūchent **S**y werdent hinder sich gekert die mir úbel wellent **S**y werdent ze hand scham(m)lich widerkert die mir sprechent wol nun wol nun **S**y frōwent sich in dir alle die dich sūchent und sprechent got sy iemer gelobt die din hail min(n)ent **I**ch bin aber ain túrfftig und arm got sol mir helffen **D**u bist min helfer und erlöser herr sum dich nit **E**r sy dem vatter un(d) et (cetera)

**an(tifon)** kum(m) hailger gaist erfúll die hertzen diner glöbigen und enzúnd in inen das für diner liebi wan(n) du von manger sprāch hest gesamnet lút in die ainung des cristenlichen globen alleluia alleluia<sup>212</sup> **V(ersus)**. Send us dinen gaist und sy werdent beschaffen **U**n(d) du wirst ernúwren das antlit der erden **V**atter únser et (cetera) **V(ersus)** [524] **N**it lait úns in bekorung. **S**und(er) lös úns von úbel **A**men

**Vers** **G**ott beschaff in mir ain raines hertz **U**nd ainen rechten gaist ernúw in minen audren **V(ersus)** **N**it wirff mich von dinem antlút **U**n(d) dinen hailgen gaist nim nit von mir **V(ersus)** **G**ib mir wider dines hailes fröd **U**nd mit dinem fürstlichen gaist so stercki mich **V(ersus)** **H**er(re) erhör min gebett und min rüffe kom(m) zü dir

**das Gebett**

**H**Err wir bitten dich das die krafft des hailigen gaistes by uns syg die da gütlichen rainingi únser hertzen und úns beschirm von allen widerwärtigen **D**urch únsern her(r)en ih̄m xp̄m dinen sun **D**er mit dir lebt und richsnet in ainikait des hailige(n) gaistes gott durch alle welt der welt **A**men

**Ze Non zit**

**G**Ott sieh in min hilff. **H**er(re) [525] yl mir ze helffen **E**r(e) sy dem vatt(er) und dem sun et (cetera)

**der ymnus**

---

<sup>212</sup> Vgl. Veni sancte spiritus reple tuorum corda fidelium et tui amoris in eis ignem accende qui per diversitatem linguarum cunctarum gentes in unitatem fidei congregasti alleluia alleluia. Dom. Pentecostes, Antiphon, Cantus ID 005327.

Kum(m) beschöpffer hailger gaist visitier die gemüt diner glöbigen erfüll mit diner obresten gnad die hertzen die du hest geschaffen Der du wirst gehaissen ain tröster ain gäb des obrosten gottes ain lebender brun(n) ain für ain liebi un(d) ain gaistliche salb Du bist siben faltig an der gäben du bist ain finger der gerechte(n) hand gottes du hest ordenlich rich gemachet die kelen der zwölff botten mit der gelobten red des vatters Enzünd das liecht in únsern sinnen ingúß din liebi únsri hertzen sygestu stercken ewenclichen mit der krafft die kranckhait únsers libs Trib von úns fer(r) enweg den vigend und gib úns dinen frid schier das wir vermiden alles böses so du fürer [526] also úns für gast Gib die lon diner fröden gib die gaben diner gnaden entrenne die band des krieges zü bind die gelúbt des frid Gib das wir wissent dūrch dich den vatter und das wir erkennen den sun und das wir globent alle zit das du syest ain gaist ir beder. Du hest erfüllt mit diner gnāden die hertzen die vor māl̄s sind gehailget nu verzih úns úns̄er sūnd und gib o stille zit Lob sy dem vatter mit dem sun und och dem hailgen gaist und der sun send us die gnad des hailge(n) gaistes Amen Sin fundament sind in den hailgen bergen der her(r) hett lieb die port syon úber alle tabernacul iacobs Erlich̄i ding sind von dir gesprochen die statt gottes Ich wird indenck raab des wibs [527] und babilonis die mich wistent Sehent die frōmden und die von thirim und und das volck von den moren die warent da selb Spricht nit ain mensch zü syon und ain mensch ist in ir geborn der aller höchst hett sy gegrunvestnet Der herr redet in der geschriff̄t des volkes und den fürsten die in ir gesin sind Als aller frōwenden wonung ist in dir<sup>213</sup> Ere sy dem vatter und et (cetera)

antiffe(n) Kum(m) hailger gaist erfüll die hertzen diner glöbigen und enzünd in inen das für diner liebi wan(n) du von manger sprāch hest gesamnet lút in die ainung des cristenlichen globen Alleluia alleluia<sup>214</sup> V(ersus) Send us dinen gaist und sy werdent beschaffen Und du wirst ernuwre(n) das antlút der erden Vatter úns̄er et (cetera) V(ersus) Nit lait úns in bekorung Sunder lös úns von úbel [528] Amen V(ersus). Gott beschaff in mir ain raines hertz Und ainen rechten gaist ernúw in minen audren V(ersus) Nit wirff mich von dinem antlút Und dinen hailgen gaist nim nit von mir V(ersus) Gib mir wider dines hailes fröd Und mit dinem fürstliche(n) gaist so sterck mich V(ersus) Her(re) erhör min gebett Und min rüffe kum(m) zü dir

HErr dem alle hertzen offen sind mit dem der gedanck úns̄er hertzen mit der gaubt des hailgen gaistes das wir dich flysseclichen minnen mugent und

<sup>213</sup> Ps 86.

<sup>214</sup> Vgl. Veni sancte spiritus reple tuorum corda fidelium et tui amoris in eis ignem accende qui per diversitatem linguarum cunctarum gentes in unitatem fidei congregasti alleluia alleluia. Dom. Pentecostes, Antiphon, Cantus ID 005327.

wirdeclichen loben **D**urch unsern herren ihesum xp̄m dinen sun der mit dir lebt und richsnet in ainikait des hailigen gaistes got durch alle welt der welt **A**men  
**Ze Vesper zit**

**G**Ott sieh in min hilff her(re) yl mir ze helffen **E**re sy **D**em vatt(er) und dem sun et (cetera)

**ymnus** [529]

**K**um(m) beschöpffter hailiger gaist visitier die gemüt diner glöbigen erfüll mit diner obreste(n) gnaden die hertzen die du hest geschaffen **D**er du wirst gehaissen ain tröster ain gäb des obrosten gottes ain lebender brun(n) ain für ain liebi un(d) ain gaistlichi salb **D**u bist siben faltig in der gäben du bist ain finger der gerechten hand gottes du hest ordenlich rich gemachet die kelen der zwölff botten mit der gelobten red des vatters **E**nzünd das liecht in unsern sinnen ingüß din liebi únsri hertzen sygestu sterken ewenclichen mit der krafft die kranckhait únsers libs **T**rib von uns ferr enweg den vigend un(d) gib úns dinen frid schier dz wir vermeiden alles böses so du fürer also úns für gast **G**ib die lon diner fröden gib die gauben diner gnaden entrenne die band des [530] krieges zü bind die gelübt des frid **G**ib das wir wissent durch dich den vatter und das wir erkennen den sun und das wir globent alle zit dz du syest ain gaist ir baiden **D**u hest erfüllt mit diner gnaden die hertzen die vormalis sind gehailget nu(n) verzih úns únsere sünd un(d) gib o stille zit **L**ob sy dem vatter mit dem sun und och dem hailge(n) gaist und der sun send us die gnad des hailigen gaistes **A**men

**S**älig sind alle die gott fürchtent und die in sinen wegen gond **S**älig bist du diner hend arbeit issest du bist sälig und dir geschicht wol **D**in wib als ain genuchsam winreb in den wenden dins hus **D**ini sun als die iungen ölbom umb dinen tisch **A**lso wirt der mensch gesegnet der gott fürchtet **G**esegen dich [531] der her(re) von syon und gesehest die güttát ze iherusalem in allen dinen lebtagen **U**nd gesehen wirst du diner kind kind un(d) frid über ysrahel **E**r sy dem vater

**Antiffe(n).** **K**um(m) hailger gaist erfüll die hertzen diner glöbigen und enzünd in inen das für diner liebi **W**ann du von manger sprach hest gesamnet lút in die ainung des cristenlichen globen alleluia all(eluia)<sup>215</sup> **V(ersus)** **S**end us dinen gaist un(d) sy werdent beschaffen **U**nd du wirst ernúwren das antlút der erden **Magnificat anima mea** –<sup>216</sup>

<sup>215</sup> Vgl. Veni sancte spiritus reple tuorum corda fidelium et tui amoris in eis ignem accende qui per diversitatem linguarum cunctarum gentes in unitatem fidei congregasti alleluia alleluia. Dom. Pentecostes, Antiphon, Cantus ID 005327.

<sup>216</sup> Das Magnificat *anima mea* (*Dominum*) (Lc 1, 46f.) ist gemeinsam mit dem *Nunc dimittis* (Lc 2, 29f.) und dem *Benedictus* (Lc 1, 68f.) einer der drei Lobgesänge des Lukasevangeliums.

Min sel grösset den herren Und min gaist fröwt sich in got minem hail Wann er hett an gesehen die demütikait siner diernen sieh da von haissent mich sälig alle geschlächt Wann er hat mir grössi ding geton der mächtig [532] ist und hailig ist sin nam(m) Und sin erbarmhertzikait ist von ainem geschlächt in das geschlächt die in fürchtent Ertet gewalt in sinem arm er zerstört die hohfertigen in sines hertzen gedanck Er satzt ab die mächtigen von dem sail und erhocht die demütigen Die hungrigen hât er erfüllt des gûtes und die richen liess er in uppikait Er hat empfangen ysrahel sin kind un(d) hat gedacht siner erbarmhertzikait Als er gesprochen hat zû únserm vatter abraham und sinem somen in der welt Er sy dem vatter und dem sun et (cetera)

An(tifon) Der gaist gaistet wo er wil un(d) sin stim(m) horest du und waist nit wannen er kumpt oder war er gât alleluia und also sind sy alle die von dem gaist geboren sind alleluia alleluia V(ersus) Gott [533] beschaff in mir ain raines hertz Und ainen rechten gaist ernûw in minen audren V(ersus) Nit wirff mich von dinem antlût Und dinen hailgen gaist nim nit von mir V(ersus) Gib mir wider dines hailes fröd Und mit dinem fürstlichen gaist so sterck mich Vatter únser et (cetera) Nit lait uns in bekorung Sunder lös úns von úbel Amen V(ersus) Her(r) erhör min gebett Und min rüff kom(m) zû dier

#### Gebett

HErr wir bittent dich du gütlicher. gûß in únser gemüt den hailgen gaist von welliches wyßhait und wir beschaffen sind und von siner ler un(d) fürsichtikait werdent geregnirt Durch unsern herren ihesum xp̄m dinen sun der mit dir lebt und richsnet iemer ewenlichen Amen

#### die Complet [534]

BEker úns gott únser hail Und ker von uns dinen zorn Gott sieh in min hilff Her(r) yl mir ze helffen Er sy Dem vatter et (cetera)

#### der ymnus

Kum(m) beschöpffter hailiger gaist visitier die gemüt diner glöbigen erfüll mit diner obresten gnaden die hertzen die du hest geschaffen Der du wirst gehaissen ain tröster ain gâb des obroste(n) gottes ain lebender brun(n) ain für ain liebi und ain gaistlich salb Du bist siben valtig in der gauben du bist ain finger der gerechten hand gottes du hest ordenlich rich gemachet die kelen der zwölff botten mit der gelobten red des vatters Enzünd das liecht in únsern sinnen ingûß din liebi únsri hertzen sygest du stercken ewenlichen mit der krafft die kranckhait unsers libs Trib von uns ferr enweg den vigend und gib úns [535] dinen frid schier das wir vermiden alles böses so du fürer also úns für gâst Gib die lon diner fröden gib die gaben diner gnâden entrenne die band des krieges zû bind die gelúbt des frid Gib das wir wissent durch dich den vatter und das wir erken(n)en den sun und das wir globent alle zit das du syest ain gaist ir baiden Du hest erfüllt mit diner gnaden die hertzen die vormâls sind



gehailget nun verzih úns únsere sünd und gib o stille zit Lob sy dem vatter mit dem sun und och dem hailgen gaist und der sun send us die gnad des hailgen gaistes Amen

Sy haind mich dick an gefochten von miner iugent spricht nun ysrahel Sy haind mich dick angevochten [536] von miner iugent und mochtet mir nit geschaden Uff minem ruggen schmidetent die sündler sy erlangetent ir boßhait Der gerecht gott schnidet des sünders hals audren sy werdent geschan(n)t und werdent hinder sich gekert alle die syon hassent Sy werdent als das how der tácher dz torret ee es ríff werd Von dem der sin hand nit mag erfüllen der es schnidet und sin schoss der die garben sammet Sy sprechent nit die da für giengent gottes seggen sy mit úch wir gesegnet úch in gottes nam(m)en Er sy dem vatter et (cetera)

an(tifon) Kum(m) hailger gaist erfüll die hertzen diner glöbigen und enzünd in inen das für diner liebi wan(n) du von manger sprach hest gesammet lút in die ainung des cristenlichen globen Alleluia alleluia<sup>217</sup> [537] V(ersus) Send us dinen gaist und sy werdent beschaffen und du wirst ernúwren das antlút der erden

Nunc dimittis<sup>218</sup>

Nun lās varen dinen knecht herr nach dinem wort in frid Wann mine ogen haind gesehen din hail Das du gemacht hest vor dem antlút alles volkes Ain knecht zü ainer offenbarung und ain er dines volkes ysrahel Er sy dem vatter et (cetera)

an(tifon) Alleluia Der hailig gaist Der tröster den der vatter sendet in minem nam(m)en Der lert úch alle ding Die ich úch gesait han alleluia. HErr erbarm dich über úns Crist erbarm dich über úns Herr erbarm dich über úns Vatter únsere et (cetera) V(ersus) Nit lait úns in bekorung Sunder lös úns von úbel Ame(n) Bestätge in úns got Das du [538] in úns gewürcket hest Ich glob in gott vatter et (cetera) V(ersus) Gott beschaff in mir ain raines hertz und ainen rechten gaist ernúw in minen audren V(ersus) Nit wirff mich von dinem antlút Und dinen gaist nim nit von mir V(ersus) Gib mir wider dines hailes fröd Und mit dinem fürstlichen gaist so sterki mich V(ersus). Her(r) erhór min gebett Un(d) min rüff kum(m) zü dir

HErr die ingússung des hailgen gaistes raingi únsri hertzen und mach fruchtbar die niderkait mit der besprengung sines towes Durch unsern herren ihesū xp̄m

<sup>217</sup> Vgl. Veni sancte spiritus reple tuorum corda fidelium et tui amoris in eis ignem accende qui per diversitatem linguarum cunctarum gentes in unitatem fidei congregasti alleluia alleluia. Dom. Pentecostes, Antiphon, Cantus ID 005327.

<sup>218</sup> Das *Nunc dimittis* (Lc 2, 29f.) ist gemeinsam mit dem *Magnificat* (Lc 1, 46f.) und dem *Benedictus* (Lc 1, 68f.) einer der drei Lobgesänge des Lukasevangeliums.

dinen sun der mit dir lebt und richsnet in ainikait des hailgen gaistes gott durch alle welt der welt **Amen**

**BE**schirm her(r) din volck durch das zaichen des hailgen crützes von allen laugen [539] únsren vigenden allen das dir genem sy das wir dir erzögen den dienst und es dir empfanglichen werd únsrer opffer **Amen**

**Diss sind die sibben zit vom hailge(n) gaist**

**Ze Metti zit**

**H**ailger gaist kum(m) ze metti zit als ain wirt in sin hus und als ain vatter zü sinen kinde(n) orden mich von ussen und von in(n)en nach dinem aller liebsten götlichen willén **Ame(n)**

**Ze Prim zit**

**H**ailger gaist kum(m) ze prim zit als ain in gelader gast und ain um(b)fahenden fründ um(b)fah mich als din gemahel das mich kain creatur unordenlich berür und ich sy widerum(b)

**Tertz**

**H**ailger gaist kum(m) zü tertz zit als ain flamendi liebi enzünd mich du wären sun(n)en dins götlichen liechtes das ich erkenn dich und mich

**Zü Sext zit** [540]

**H**ailger gaist kum(m) zü Sext<sup>219</sup> zit als ain wäres rifier das von der gothait flúst und sich in alle innige hertzen gúst gúß dich hertz lieber her(r) in alle krefft miner sel **Amen**

**Ze Non**

**H**ailger gaist kum(m) zü Non<sup>220</sup> zit als ain süsse senffte rûw **G**elich mich zü den engeln gúß in mich din hailig gothait das ich dich ewenlichen lob und by dir woni hailgi drivaltikait **Amen**

**Ze Vesper zit**

**H**ailger gaist kum(m) ze **V**esper zit als ain süssi die mich mach in allen tugenden wyß **O** hailger gaist bis mir ain Ewigi spis **Ame(n)**

**Ze Complet zit**

**H**ailger gaist kum(m) zu **C**omplet zit als ain bilgri in ain hus **I**ch bitt dich hailger bilgri kum(m) in min hus un(d) niemer mer darus **Amen** [541]

**hie hebent an die sibben gauben des hailgen gaistes**

**Die erst gaub**

**O** lieber her(r) hailger gaist gib mir din götlichen vorcht in den ich volkomenlich mug gelassen all min sünd missetaut untugent und allen minen gebresten wider stand und mich an allen tugenden und an allen gúten wercken kunn üben

---

<sup>219</sup> Großgeschriebener Anfangsbuchstabe, aber nicht rubriziert.

<sup>220</sup> Großgeschriebener Anfangsbuchstabe, aber nicht rubriziert.

Sprich zü ainer ieglichen gaub j p(ater) n(oster) un(d) j ave maria.

Die ander

O Lieber her(r) hailger gaist gib mir din götliche(n) güti die nid und hass und alle boßhait von minem hertzen tribe Und mir gebe ain demüütiges fridliches und ain getrúwes hertz das ich mich mug demüteclich erbieten gen allen menschen und mach da mit ainen sölichen frid in mir das du in dem selben fride selber wonen [542] wellist

Die dritt gaub

O lieber hailger gaist gib mir din götlich kunst das ich miner gedenck hüte und warne zü allen ziten und widerbring mit diner götlichen kunst Die krefft miner sel die verfallen sind und erlúchte mir min sin(n) die erblendet sind und tû das nach dem höchsten und nach dem besten als du sÿ an dehainerlay creatur wider bracht hást

die Vierd gaub

O lieber hailger gaist gib mir din götliche stercki das ist din götliche inbrünstigi liebi dz ich dich also krefteclichen werde lieben das ich in der crafft diner liebi wider ston mug un(d) überwinden all boßhait des bösen gaistes das ich hin legen muge allen minen gebresten das ich verschmahe alle ir(r)desche ding [543] das mich din götliche liebi zúh in das ewig güt das du selber bist das ich mit dir also veraint werd das enkain mittel zwúschen dir und mir werden Gib mir in diner götlichen liebi ainen verainten willen mit dir das ich in allen sachen in lieb und in laid nicht wellen dann das du wellest volbringen in diner götlichen liebi an mir

Die fünfft gaub

O lieber her(r) hailger gaist gib mir dinen götlichen raut und gerúch fürbas ze sin ain anvang ain mittler und ain ende aller miner werch wort willen und gedencken. ain richter und ain ordner alles mines lebens und wandels un(d) ler mich her(r) zü ainer ieglichen wile wie ich tûn oder lassen sölle Und gib mir din gnad das ich dir also nach volge das ich nach [544] dinem willen werb und leb und sterb Gib mir rechten cristenlichen geloben das ich daran niemer verirret werde untz an min end und behútte mich vor allem dem das mich geirren mug Un(d) gib mir ze erkennen die luterkait und die rainikait des lebens xpī und rainge und haile mich in allem minem leben in dem leben xpī Gib mir ainen festen müt und ain brin(n)endi liebi die an mir erfülle alles das ich in minem leben versumet hab das min sel mer schaid von dem lib von der crafft diner götlichen liebi dann von der crafft des todes

Die sechst gaub

O lieber her(r) hailger gaist gib mir din götlich verstantnus in der ich dich un(d) mich erkennen werd in rechter wárhait das ich min armes leben [545] also erkenne Das ich lass und bessre alles das dir missvalle an mir das ich dich och

werde erkennen in der höchsten luterkait und warhait in dich ain creatur  
erkennen mag in diser zit das ich ze mal gezogen werde in das liecht diner  
claren gothait und min selber da vergesse und aller creature das ich mit dir  
volkomelich veraint werde **Hilff** mir das ich darinne in rechter demüt bestande  
**Dz** ich mir selber nichts nit aigne in dinen gnaden und also ledig in mir selber  
sy das ich dir alle gaben kunn widergeben in der luterkaite als sy von dir  
geflossen sind **Gib** mir in diner götlichen verstentnüsse hitzige brin(n)ende  
begird nach dir die mir ain usgang und ain wäschung ab schweben sy von [546]  
aller creature das ich dir allain lebe

**Die sibent gaub**

**O** lieber her(r) hailger gaist gib mir din götlich wyßhait das ich dich kunne  
bitten der ding der du mich gerne wellest geweren und wo ich dich nit recht  
kunn bitten so erhör mich in diner götlichen göti nach dem aller höchsten als  
es dir ain wol gevallen an mir sy. lieber her(r) gib mir din wyßhait das ich dich  
find und das ich din also beger dz du zü mir wellist kum(m)en **Das** ich mich  
gen dir erbieten kunne dz du by mir beliben wellest und das ich dann in dir stät  
belibe in diner liebi **Gib** mir och her(re) das ich mich also wyßlich kunne halten  
in allen dinen gnaden und gaben das ich din gnad nie mer verliere und das ich  
in allen sachen diner götlichen man[547]ung und werch sye **Amen**

**O** Du hohes liecht der hertze(n) **O** du hailiger gaist **Ich** bitt dich durch din  
gütikait gedenck zü komen in min sel un(d) erlúcht sy mit ainer wären  
erkantnüsse aller güten ding und sträff in miner gewissne haimlich wollnust  
und vertrib von mir die grussam vinsternus miner blöden menschhait mit dem  
glantz dines liechtes. kum(m) zü genädiger vatter der armen waisen **Und** wend  
von mir allen gebresten miner sel und des libes und gedenck mich zü  
zebegauben<sup>221</sup> mit dem hort aller tugent **Du** süsser trost aller betrübten sündner  
**Kum(m)** mit dinem trost in alle hertzen **Die** da verzagen wellent in iren sünden  
und tröst sy das sy niemer verzagen an diner gnäd **Vorus** so empfilch ich dir  
min sel [548] das du die zü irer schaidung **Die** sy tün wirt von dem licham  
erlúchten wellist mit dem liecht göttlicher verstentikait das sy da vest und  
starck sye in cristenlichem globen und on vorcht frölich wider stand aller  
anvechtung und irrung mit fröden und da entrinn allen hellischen vigenden. **Du**  
hailger gaist ain milter tröster aller betrübten **Du** bist der gevangnen und  
ellenden ain uff enthaltung wann du nieman tröstest denn der da betrübt ist  
durch siner sünd willen **Darum(b)** der mensch ellent ist und geschaiden von  
den ewigen sälligkaiten **Du** bist der ewig trost wann du die allain tröstest die  
den weltlichen trost versmahent um(b) den ewigen trost **Und** wer da hie den  
zergenglichen trost süchet der ist unwirdig des ewigen [549] trostes **Und** dar

---

<sup>221</sup> In der Handschrift steht *zū ge (?) zebegauben*.

um(b) bitt ich dich nach begir mines hertzen das du min hertz also erlúchtest  
un(d) erfrowest das ich versmahe alle zergengliche fröd **D**urch dines trostes  
willen **W**ann ich waiß das es wol billich ist das dich der verlúren sol ewenlich  
der sich mer erlustet in ander dingen den(n) in dir dar um(b) bitt ich dich mach  
mich also bitter in miner menschhait das allain du süß syest in minem hertzen  
**O** süsser gaist kum(m) in die herberg mines hertzen **G**ib mir die tugent da mit  
ich ziere min hertze das darinn múg behút werden die hailgen **S**iben gaben mir  
in disem leben zü nütz des ewigen lebens **D**u süsser tow erkúle mich vor der  
hitz der súnd und vor dem ewigen flam(m)en **D**u ewiges für das da all wegen  
[550] brinnet und in hitzig ist un(d) niemer erlöschet **E**nzünd mich in minem  
leben du götliches liecht das da allweg lúchtet und niemer erlöscht erlúcht mich  
du bist ain rúwe in der menschliche(n) arbeit **G**ib mir die ewigen rúwe **D**as ich  
entrinn der bürde der anvechtung und rúwe fürbas von allen minen sünden  
**W**ann ich nun recht müd sy in der arbeit der boßhait **D**as du denn syest ain  
senffter wind in minem ungewitter un(d) mir trostlichen helffest us aller not  
her(r) hailger gaist gedenck mich zü wysen mit diner inwendigen fürdrung ain  
rechte(n) weg der götlichen ewikait du süsse fröd in dem tal der zäher erlúcht  
mich in minem clagen **W**ann din fröd ist süsser dan(n) alle fröd diser welt  
**D**arum(b) [551] rainge mich von allem unflät der betrieglichen wollust und  
von der unrainen lieb der ungetrúwen welt. rainge och mich und min türres  
hertz mit dem sálgen regen diner gnaden hail die wunden miner missetät **N**aig  
von mir all min úbel und verwend das mit diner demütikait **D**u sálger brun(n)  
aller túrstige(n) menschen schick mir gnadeclichen **D**ie siben gaben das ich da  
durch begábt werde kreffte(n)clichen zü dem ewigen leben **S**chick mir von  
aller erst götliche vorcht mit flyß zü erfüllen die zehen gebott un(d) dich zu  
fürchten als min strengen un(d) ernstlichen richter **S**chick mir och gütikait  
minem leben das ich min nächsten als lieb hab als mich selb **S**chick mir die  
gab der größmütikait dz mich [552] kain úbel nit tring von götlicher liebi **I**ch  
beger och des rátes götlicher verstentikait das ich mich selber durch den múg  
hilfig min zü nutz miner sel **I**ch beger och gantz ainer rechten verstentikait  
mines leben das ich da us werff von mir alle naigung und fürdrung diser  
schnöden welt die mich min tag vil geziert hât von dem ewigen leben och zü  
dem letzten **S**o beger ich ain grund rechter und wärer wyßhait die wil und ich  
leb nüt anheb noch würck wider din götliches wol gevallen un(d) on das in  
sprechen des hailgen gaistes **T**renck mich och in disem ellend mit dem süssen  
un(d) hailsamen tranck diner gnaden das ich da mit an der sel gehailt werd  
von minen gifftigen wunden aller súnd her(r) aller [553] gúti du hailigester  
gaist **S**id dem mal und du den hailgen licham únsers herren ihú xpī uss der  
rainen iunckfrowen maria gebildet hâst den sy in von dir empfieng **D**arum(b)  
bitt ich dich gib mir die gnad das ich den selbe(n) hailgen licham unsers herren

ihú xpī und sin túres blüt also wirdeclichen empfahren múg zü der zit so es mir von der hailgen müter der cristenhait gebotten ist und vor us zü minem letzten zit das ich in süssikait hie empfah in gnaden un(d) dört in den ewigen fröden sälligclichen Amen

**V**Erlihe úns dinen dienern bitten wir dich her(r)e únser gott ze fröwent ewiger gesunthait des gemüts un(d) lichams un(d) durch das erwirdig gebett der hailgen ze allen ziten mugent [554] erfröwet werden maria von disen gegenwürtigen betrübtnus ze erlösen und die ewigen fröde ze bruchent **D**ürch den der komend ist ze richten über die lebenden und die tötten in gotz nam(m)en Amen

[Miniatur: „Dreieinigkeit“]

545 554

erfremet werden maria von disen  
gegenwärtigen betrubnis zu er  
losen und die ewigen freude zu beu  
schen Durch den der komend ist  
zu richten über die lebenden und  
die toten In gotz namen Amen

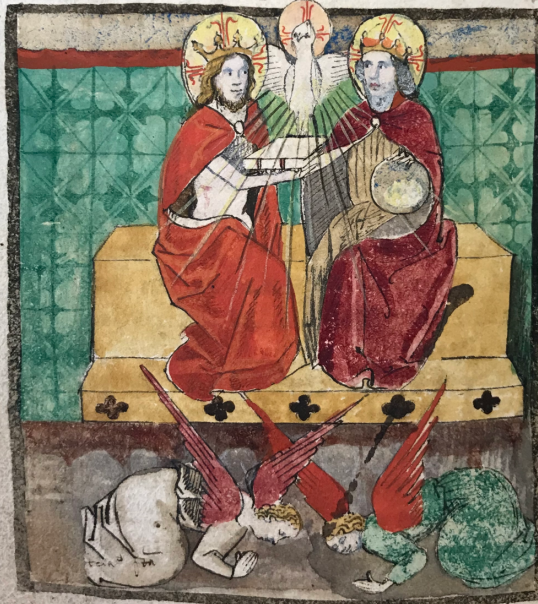



[555] Ain lobliches andächtiges gebett zü der hailgen drivalentikait dārinne der mensch underwiset wirt gott ze erkennen

Sancta trinitas v(ersus) O Hailige drivalentikait O ainige ainikait du hailge mayestetlichait ewige barmhertzikait Got vatter sun hailiger gaist ain ware gothait drivalentig in der person und ainig in dem wesen schöpffers himels und der erde miner armen sel trost Sieh hútt in mich armen sūnderinen mit den ogen diner götlichen liebi da mit du an gesehen hāst alles menschliches geschlāchtes da du es zü dem ersten māl gedachtest zü erlösen Sieh mich an mit den ogen diner barmhertzikait da mit du angesehen hast mengen grössen sūnder in ain büß[556]vertiges leben hie uff erd der ich laider nit der minst bin Ach min gott läß mich din erbarmen un(d) fürder mich hie in diser zit in din gnad laß mich nit ersterben in minen sūnden gib minem leben ain vernúnfftiges end Strāff mich nach diner erbarmhertzikait un(d) nit nach minem verdienen Un(d) verlih mir darinne ain vernúnfftiges hertz durch din vātterliche liebi die du hast zü úns armen menschen hie uff erd du ewiger erbarmhertziger gott Amen

Allmächtiger vatter himels und erden als du mit diner götlichen macht alle ding geschaffen und geordnet hast und alle schöpfung in diner pfleg in dinen götlichen gnaden ist un(d) mit nam(m)en als die hailgen engel vor dir in gütem für satze und sālger ewiger mainung bestāt[557]tiget sind Also das ir wille allweg dinem willen volget Also bitt ich din vātterlichen gnād dz du mit diner götlichen mächtigen volkomehait mich stercken wellist und mich also bestātigist das ich zü miner sel trost dinem willen stāteclich folge

O Ewiger schatz götlicher wyßhait trostlicher schin vātterlichen allmächtiger sun des allmächtigen vatters wan(n) in dir als in ainem götlichen sarche alle wirdi alle ere alle gezierde götlicher wyßhait verschlossen ist und als der allmächtig vatter durch dich und mit dir alle ding geschaffen hāt und als alle ding offenbār und luterlich kund sind dinen götlichen ogen und och nichts ist das sich verbergen mag vor diner götlichen angesicht [558] Also beger ich diner genaden das du min sūndiges hertz uss der finsternus böser gedenck und böser fürsatzes also laiten wellist das ich wirdig werd dines ewigen götlichen antlúts eweclich ze schowen Amen

Trostlich trost cristenliche(n)s ordes gott hailger gaist glich dem vatter und dem sun als du mit dinem götlichen trost aller patriarchen propheten zwölff botten martrer Iunckfrowen wittwen und frowen hertze also gestercket hāst das sy mit diner hilff wirdig worden sind des ewigen lons Und dir all zit wol ist mit kúnschen gedencken also bitt ich din götlich gnād das du min hertz in rechter erbschaft uff nemist und besitzist also dz der úbel tätig vigent menschliches geschlāchtes nit muge in mir [559] zü kainen ziten erfinden Ame(n)

O allmächtiger vatter starker gott und behalter aller ding allmächtiger sun grund aller wyßhait durchlúchter schin vätterlicher eren Allmächtiger gaist liebschafft un(d) frintschafft des vatters und des suns in die güti sicht der vatter den sun mit dem götlichen kuss erbüttet dry personen ain waurer gott hailge drivalentikait Ich rüff und schry zü dir und offembar min hertz von dem tron diner götlichen wirdikait und bitt dich flissenclichen mit rúwendem hertzen mit betrubten wässrigen ogen mit dem fluss den su selber in mir durch gnad würckest das du mit diner götlichen macht mich also sterkist mit diner wyßhait also erlúchtist und also bestätigist mit diner güti [560] des hailgen gaistes das ich in die zal kom der sálgen die du erwelt häst Ee du himel und erden geschaffen häst Amen

O Du hailige drivalentikait und allmächtiges götliches wesen und unzertailliche ainikait vatter und erlöser ihú xpē durch dinen gewalt und mine grösse barmhertzikait und mine grösse armüt gib mir und minen fründen die rúw san(n)t Peters die bekerung san(n)t Pauls die liebi san(n)t Marien magdalenen die gedult Sant iobs das end des schächers zü der rechten hand gemeinsami aller gütter ding Und nach disem leben das ewig leben Amen

Ain anders zü der hailgen drivalentikait

O Rex regu(m) v(ersus). O her(r) min [561] gott ain kúnig ob allen kúngen und ain gewaltiger fürst in hymel und uff erden Du liebhaber aller búßfertigen menschen. hilff mir armen súnlerin das ich kom(m) an ain wesen darin(n) ich erlange din gnad und ablaus miner súnnde Ach richer milt(er) gott bis mir gnädig und vergib mir min grösse sünd wort un(d) werck bös gedenck wyle un(d) zit die ich laider úbel verzert han hie uff erden und minen größen unfliß den ich gehept han in dinem hailgen dienst und besunder mit minem bösen wille(n) der mich laider offte zü sünden haut gebrächt [562]

[Miniatur: ‚Monstranz und Eucharistie‘]

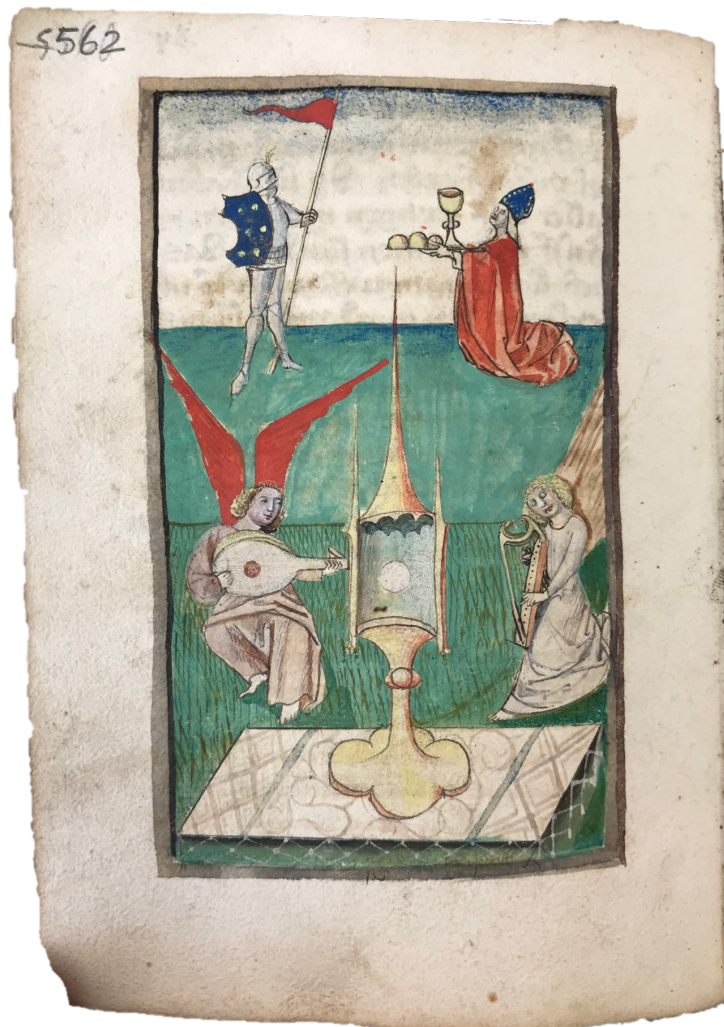

[563] Diss singt man an únsers herren fronlichnams tag dem Sacrament ze lob und dz sprach gott in der alten Ee durch den propheten ysayam

HErr ich loben dich du bist ain wunnecliche gezierde alles himelschen hofes Ich loben dich das du bist die guldin port in die abgrüntlichen gothait Ich loben dich das du bist ain ewig liecht und luter spiegel aller rainen hertzen Ich loben dich dz du bist das unschuldig Osterlemby das die schuld der welt uff im trait Ich loben dich das du bist ain fröliche spis der engel und aller betrüpten hertzen Ich loben dich das du bist ain milter us fluss aller richait götlicher gäben das du úns so milteclich ladest [564] Als die ewig wyßhait uß rüffet un(d) spricht kom(m)ent her ir rúwigen zü der spis úwer begnadung. kom(m)ent her ir blinden zü der spis úwer erlúchtu(n)g Kom(m)ent her ir krancken zü der Spis úwer sterckung. Kom(m)ent her ir trurigen zü der spis úwer trostung. kom(m)ent her ir min(n)enden zü der spis úwer veraingu(n)g kum(m)ent her ir luten zü der spis der gothait O lieber mensch nun schick dich dar zü das du frölich mugist kum(m)en zü diser erwirdigen ladung des aller höchsten Sacraments<sup>222</sup> der selb der wirt und die wirtschafft ist

Der ym(nu)s Pange Lingua

Sing du zung loblich des lichnams hai(m)likait und des costbaren blütes dz für der welt lon die frucht des gebornen libs der kúng vergossen [565] haut den geschlächten Er ist geborn úns gegeben von der unvermäßgoten iunckfrowen un(d) in der welt gewandelt gesäyet durch den somen des worts siner in wonung mit wunderbaren ordnung beschlossen In dem letzten nach mäl do er gesessen ist mit sinen brudern un(d) nach volkomner behaltung der gesatz in den spisen gesetzten dise spis der schar der zwölff botten sich selb gab er mit sinen henden Das wort flaisch ward brot von dem wort ward flaisch und der win wirt blüt xpī und da haind die sin gebresten doch zü verston ain luter hertz so ist gnüg der glob Hir um(b) ain söliche hailge haimlichait söllent wir genaigten erwirdigen und das alt gesatz sol wichen dem núwen sitten [566] und der glob verlih úns vollung der sinnen gebrestenhait Dem geberer und dem gebornen sy lob und hüglichait hail und och mächtikait im sy och gesegehnait der us gät von in baiden dem sy all weg loblichait Amen

GEgrützt syest du lieber herre ihú xpē des ewigen vatters wort der sun der werden iunckfrowen marien das lemli gottes das hail aller welt das ware opffer das wort das mensch worden ist der brun(n) götlicher gütikait

Gegrützt syest du her(r)e ihú xpē lob und e(e)r aller engel aller hailgen er und wirde ain gesicht des ewigen frides wari und gantzi gothait warer mensch ain blüm und frucht der iunckfrowen und mütter

---

<sup>222</sup> Großgeschriebener Anfangsbuchstabe, aber nicht rubriziert.

Gegrützt syestu her(r)e ihesu [567] xpē der glast und schin des himelschen vatters ain fürst des frides ain tür des himels ain wär brot des lebens der iunckfrowen gebürt ain vass der gotthait

GEgrützt syestu her(r) ihú xpē des himels liecht der lon da mit die welt erlöst ist aller menschen fröd der engel spis und brot. ain wun(n) und fröd aller rainen hertzen un(d) kúng und gemahels raines magtúms

GEgrützt syestu her(r) ihú xpē das süsse un(d) wun(n)eclich leben der dinen die wär und gerecht warhait únsere ewiger lon die höchst liebi der brunn warer minn der wär frid Süssikait únsere ewigen rúw und únsere ewiges leben Enzünd únsere hertzen und gemüt mit dem für diner minne Das wir [568] alle zit die sünde hassin endrun(n)en und engangen dem ewige(n) tod mit diner hilff und durch dich herre ihú xpē der du bist ain behalter aller der welt ain gott mit dem vatter und mit dem hailigen gaist eweclich

O Maria ain kúngin aller eren und wirdikait lob gnad und danck sage dinem minneclichen kind unserm her(r)en ihú xpō. lob und danck sagen im och alle engel Un(d) hailigen won er das wär gottes lem(b)li ist das an dem hailigen crütz für úns tod ist Der da lebt und richsnet nu und iemer ewenclich wärer allmächtiger gott und des sölle wir úns fröwen und fro loben und sölle im des lob er gnad und danck sagen eweclich und on end un(d) andächteclich Ame(n)<sup>223</sup> [569]

GEgrützt syest du anvang unser geschöpfftes. Gegrützt syest du ware spis únsers ellenden wegs den wir wandren Gegrützt syest du welt hail das wort des vatters Du wär hostie du lebendigs flaisch du gantze gothait du warer mensch Gegrützt syest du wäres flaisch Ich unwirdigiger mensch ich bitt dich Und betten dich ussen an das du mich erneren und uffenthalten wellist in der zit und stund mines todes un(d) das du mich gesund machist Rainge mich das ich nit werde verdamnot mit de(m) andren tod Gegrützt syest du únsere kúngin dauides sun Sun des lebendigen gots<sup>224</sup> der komen ist zú ainem opfer únsers hails Den der vatter ge[570]sendet hat in dise welt mach mich sálig mit dem Sacrament diner hailikait kere enweg dinen zorn und verlihe fride und antráchtikait der cristenhait Gegrützt syest du unser kúng du bist das unsichtig brot ain tranck diner ußerwelten selen kum und gang in mit dinem unsichtigen verborgnen lichnam in min sel und mach sy sálig in dir selb Won du bist allain xpūs ain sun des lebendigen gottes ain kostbars und túres blút Ain brunn des lebens der us geflossen ist von der siten xpī gegaiselt und gepinget an dem flaisch genötiget und bekúmbert flúß in min sel mit ainem in giessen und in fluss des hailigen gaistes und erfülle min sele mit der wär[571]hait die du bist Amen

---

<sup>223</sup> Großgeschriebener Anfangsbuchstabe, aber nicht rubriziert.

<sup>224</sup> In der Handschrift steht *Sunder des lebendigen gots*.

GEgrützt syestu her(r)e ihú xpē war lichnam als du bist geborn von marien der rainen magt fryen die menschait um(b) úns er leben an das crütz ward gegeben in den bittren tod Du lostest úns uss aller not Din sit ward dir durch stoche(n) des blütes sprung hat úns zerbrochen und gewaschen ewig laid das úns zü der helle wz berait du mir ze trost send dich selb an min end O süssi O gütti O milte O ihú du bist in der wären min(n) ain bilde O gottes ainiges kind. bitt für úns alle die nu sind

HErre ihú xpē allmächtig(er) gott der du disen aller hailigosten lib emfange(n) hást von der ußerwelten iunckfrowen lib sant marien und uss [572] gegossen hast an dem vil hailigen crütz din vili kostliches blüt und mit dem selben ersamen lib von dem tod bist uff gestanden und ze himel gevaren Und aber künfftig bist ze richten die lebenden und die tötten mit dem selben lib erlöst mich her(r) durch dinen aller hailigosten lib den man ietzunt uff dem altar wandlet und handelt von aller miner unrainikait des libs und des gemütes und von allem úbel Es sye gegenwirtig oder vergangen oder künfftig Amen

#### Von unsers her(r)en fronlichnam

GEgrützet syest du gewaurer hailger fronlichnam und blüt unsers herren ihú xpī Gegrützet syestu úns er hail Gegrützet syestu ain gelt úns er erlösung Gegrützet syestu [573] úns er züversicht Gegrützet syestu ain weg wyser úns er bilgrischafft Du bist xpūs des lebenden gottes sun der durch das gebott des vatters die welt hast behalten Darum(b) sagent wir dir gnad und danck von Ewen ze Ewen Amen

Ich bitt dich hailger fronlichnam und blüt ihú xpī das da um(b) der welt hail an dem stam(m)en des hailgen crützes für alle menschen ward geopffert Un(d) durch das wunderlich haimlich würcken des hailigen Sacrame(n)tes So begir ich das du min sel und minen lib behaltist und behütist vor deß bösen gaistes lägen und vor aller boßhait der valschen menschen Ich bitt dich das du mich erhörst Durch dz hailig opffer das hütt und täglich der priester da gegenwirtig [574] und alle priester niessent und opffrent zü lob und er dinem aller hailigosten nam(m)en Adonay das du alle min súnd erbarmhertzeclichen tilgen wellist und mich nit lāssist verloren werde(n) von miner súnd wegen

O aller miltester gott Emanuel ain anvang aller der welt Aller süssester sennftmütigoster ihesu xpē Gedenck dz du úns er flaisch und úns er brüder bist Darum(b) so strāff un(d) büß mich in diner erbarmhertzikait und nit in dinem zorn. Gib mir her(r) ihú xpē gewären frid festi züversicht und gerechte(n) globen volkomen minn künshait libs und gemütes Gedultikait und brüderliche liebi zü minem nächsten und verlih mir sölichen rúwen umb min súnd der dir gevall nāch [575] diner grössen erbarmhertzikait das sich din hailgen engel fröwint in miner bekert nun und in der künfftigen zit Amen

Ich bitt dich aller hailigoster frönlichnam unsers lieben herren ihú xpī **D**ürch  
 den gewaren frid den du hast gemachet do du dich selbs lebendiges raines  
 unvermäßgotes aller hailigostes opffer uff trügt dem himelschen vatter zü  
 versünen alles menschen kúnn **U**nd durch den schrecken den du an dem crútz  
 hangent dem túfelschlichen schlangen hast gemachet **D**o er von dir  
 úberwunden ward. **H**ilff mir das ich in alle zit úberwind un(d) alle min vygent  
 gesichtig un(d) ungesichtig und durch die bách dins blütigen **S**chwaisses un(d)  
 durch din hailiges opffer niessung und gegenwirtikait dins [576] hailgen  
 fronlichnams **S**o erhör mich das die selen mins vatters und miner müter miner  
 vordren und die mir bevolhen sind **O**ch aller glöbigen selen von der grúb der  
 hellschen pin und von dem ellend der vinsternus gerúchist us füren **U**nd sy  
 setzist in die statt der erkülung und der ewigen clarhait **U**n(d) mich armen  
 súnderinen lösist und raingist von allen minen sünden un(d) vor dem gähen  
 unversehnen und ewigen tod und beschirm mich alle zit **B**esunder in der stund  
 so min sel von minem lib schaiden sol das mir denn din hailiges crútz un(d)  
 alles din liden **O**ch din hailge urstendi ze trost und ze hilf kom(m)e  
**I**Hesus du bist ain spis des ich leben sol **D**u bist ain blüm des ich mich fröwen  
 sol und ain lieb das ich minnen sol und bist [577] ain spiegel den ich schowen  
 sol und bist ain hort den ich iemer me besitzen sol **A**men



[Miniatur: „Jüngstes Gericht“]

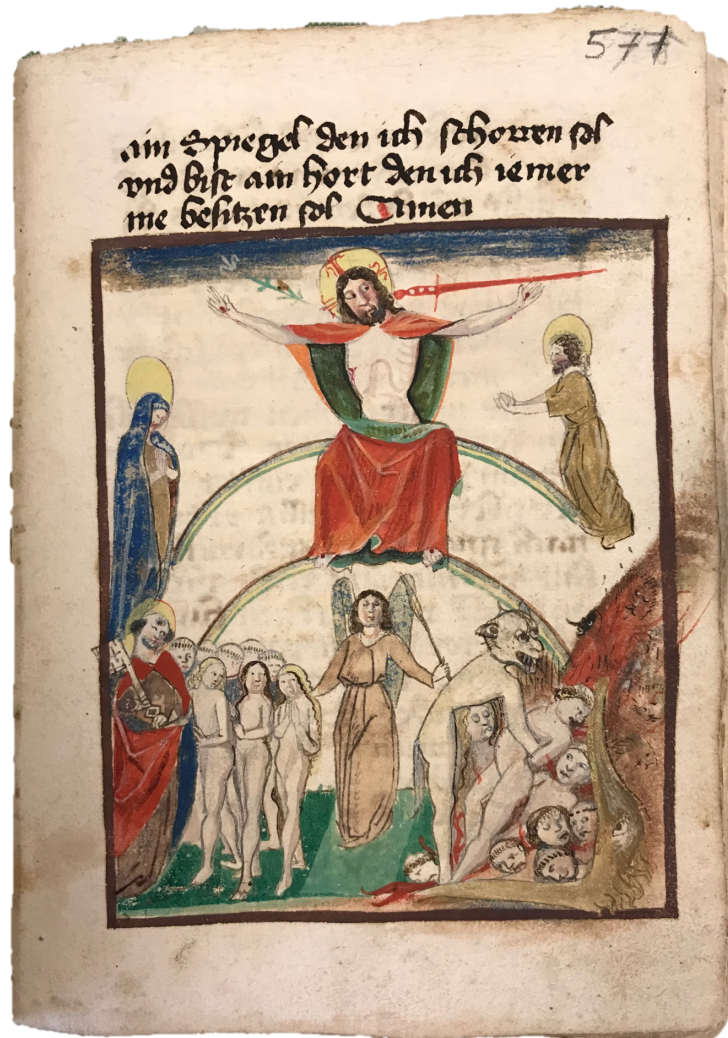

[578] **O** lieber mensch bedenck un(d) betracht was erschrockenlichs un(d) bydemes tages dz ist sö der zornig richter zü gericht komet un(d) nit anders richtet denne nach gerechtikait

**O** lieber herr ihú xpē **I**ch armer súnder bitt dich das du mir nit erschinen wellist als ain zorniger richter **S**under als ain gnädiger richter und her(r) über mich wellist urtailen nach gnaden und erbarmhertzikait und nit nach recht un(d) din unschuld wellist setzen für min schuld vor dinem vatter und das ich nit verurteilt werd des ewigen todes **S**under mit dinen userwelten besitze die ewige fröde

**G**Edenck und betracht in(n)eclich wie din lib und menschait an der úrsten[579]de gestalt und verclärt werd wenn din lib wirt ze siben mälén klarer denn die sun(n) er wirt och untötlich unlidelich behend und die sele mit nichte als nu beswärt **E**r wirt än allen gebresten kainerlay ding betürffent starck gesund schön und wol gestalt vol alles wollustes und mit vil anderm güt begabet die man nit kúrtzlich erzellen kan noch mag und in der betrachtung diser glori und er und wirdigkait werdent dir bilich ring alle úbel und widerwärtikait die du durch gottes willen lidest in diser welt

**D**is betrachtung des lidens marter tod und úrstendi únsers herren ihú xpī **I**st hie beschriben uff das kúrtzest un(d) um(b) das das du der bist der in [580] gaistlichem leben volkomen wilt werden in dem bûch und lere ain raitzung **U**nd ain materi habist dir selber zü wecken gaistlicher übung un(d) ist das du dich an diser betrachtung emseclich un(d) mit fliß übest so findest du vil bessere und süssere ding den(n) die geschriben sind wan(n) in dem leben ärnde lere und liden und marter xpī **I**st verborgen ain ungemessner schatz göttlicher gnaden den der allmächtig gott den menschen gibt durch sinen ain gebornen sun unsern herren ihesum xpī **D**er ain brun(n) ist der niemer unfliessent ist der ainem ieclichen menschen **D**as trincken der gnaden git nach dem als er fächtig ist un(d) darumb ist das du dich emselich in diser hailgen betrachtung übest [581] so vindest du núwe und ungehörte güte gaistlicher gnad die nie nieman geschriben noch geprediget hat und darum(b) flisse dich das du alle zit **Ú**nsere herren ihesu xpō an ligist un(d) mach dir das liden ihú xpī zü ainer tagwaid **D**ie du alle tag in dinem gemüte überlöffist das du da mit verdienist ze werden und och sin der frucht des holtzes des ewigen lebens des holtzes frucht sind alle erwelten

**U**nd ob das beschäch das du ie in diser hailigen betrachtung nit gnad nach diner begirde fundist **D**arum(b) solt du nit ablassen won der her(r) waist wol was dir nütz und zimlich ist und was gnaden er dir sol und geben wil **D**arum(b) vol wach klopf an und bitt um(b) gnaud bis dir die tür der gnaden werd [582] uff geschlossen

**GE**denck das das **I**är nit all zit grünet und blüyet als das glentz und das es nit all zit als genuchsam ist als an dem herpst **A**lso ist och nit all zit die zit der gnaden un(d) gaistliches trostes **S**under es ist ettwen ain zit das der mensch an vechtung und widerwärtikait lidet und mangel und gebresten hât der gnaden **D**ärumb so die gnad dem menschen underzogen werde das der mensch den(n)e dester begirlicher und dester flisseclicher danckberlicher und gewärlicher süche und halte un(d) och darum(b) das der mensch bekenne das die götlich gnaud sin von rechtes wegen nit ensy mere das sy allain von dem götlichen wolgevallen dem menschen geben werd und du [583] solt nit ablassen du söllist das liden xpī des tages ainest betrachten nâch dem als du vermögist denn wöltest du von klainem und lichten dingen und sach ablassen **S**o würdestu von tag ze tag ye träger ÿe träger **A**lso das du zü dem letzten gentzlich da von liessist und das götlich liebi erlâsch gentzlich in dir **I**st aber das du nit ablässest **S**under das du all zit hast ain widerkeren zü der hailigen betrachtung so siecht got an dinen flisse und die begirde diner andächt **U**nd mag beschehen dz du ettwen uff klaine stunde mer gnaden und innerlicher süssikait vindest den(n) ob du allen tag an diner betrachtung gelegen wärist won der allmächtig got kan und mag gröslich widerlegen die zit die in gehorsami [584] willeclich und demüteclich verzert wirt **U**nd ob du als ungrübt oder als hertes hertzen und als ungeschickt in dinem gemüt wärist das du wöltist noch enmöchtist gaistlicher gnaden und süssikait nit süchen in dem liden únsers herren ihú xpī denocht so ist es dir nütz vor allen dingen das leben und liden xpī all zit vor ogen haben won in dem vindestu ain form ain bild williger armüt **W**on do er verwunter an dem hailigen crütz hieng **D**o hatt er nit das er sin hopt naigte du vindest an im ain bild volkomner demütikait won er spricht lernent von mir won ich gütiges und demütiges hertzen bin. ain bild der gehorsami won er dem vatter bis in den tod ist gehorsam gewesen **A**in bild der senftmutikait won er güt [585]lich vergab dem schwächer sin sünd der mit im gecrützget ward ain bild warer liebi gen den vygenden won er batt für die die in crützgoten **A**in bild zü der liebi zü den fründen do er sinen iungern gab sinen hailgen fronlichnam und sin werde müter dem iunger und den iunger siner müter empfalch **A**in bild der kúnshait und luterkait won er von ainer lutren iunckfrowen wolt geborn werden. ain bild der gerechtikait **D**o er iohanni dem töffer zü sprach folge mir won úns zimpt das wir volbringin alle gerechtikait **U**nd och dz er nie mensch geschadgot noch nie kain sünd getett noch nie unkúnse in sinem mund funden ist **A**in bild groß und fryer miltikait won er ain hohes und groß ding in siner marter vol[586]bracht hat ain bild der gedult **W**on do er sin vygent un(d) durchächter mit ainem wort möcht er han nider geschlagen als er tett **D**och so laid er gedulteclichen das sy in crützgoten **A**in bild der fürsichtikait und wyßhait won er den iuden und den fürsten un(d) pylato witzeclichen antwürte und do in die

glichsner an siner red und worten gemerkt und gevangen wolten han **U**nd er sy  
offenlich mit siner wysen red schamrot machet und das was wol billich won er  
ist die wär wyßhait des himelschen vatters und won unmüglich ist das man sin  
tugent und gnad alle kurtzlich erzellen mug und darum(b) so sprich ich mit  
ainem kurtzen wort alles das tugent gütikait süssikait hailikait volkomenhait  
ist das vindest du alles genuchsamclich [587] und volkomenlich in dem leben  
wandel ler und liden únsers herren ihú xpī und darum(b) so hütt dich das du  
dich selber nit sumist won du sin ain güt genuchsam täglichen fründen macht  
ob du in mit gantzem hertzen süchest won es ist nit not das du in ze paris oder  
in andren hohen schülen süchist **S**under du vindest in an allen stetten **I**st das du  
es in mit gütigem hertzen süchest **I**st aber das du dise zit die dir got verilien  
hat unnützlich vergon lässest **S**o kumpt ain zit uff die du in gern süchtist. aber  
du macht es nit getün als er selber spricht **W**achent won ir wissent nit den tag  
noch die stund des todes uss die stund vil menschen schwarlichen funden  
werdent un(d) besunder von den die in hie in allem irem leben nit gesücht [588]  
habent der doch all zit und stund ze süchin ist **Ú**nser herre ihesus xps der mit  
dem vatter und mit dem hailigen gaist lebt und richßnet iemer ewenclich **A**men  
**O** lieber herre ihú xpē als du um(b) erlösung der welt von himel her ab woltest  
komen und dich demütigen **U**nd verkunt werden durch den engel gabriel  
geborn in klaine tuchelin gewunden in ain kripp gelait für dz vich **D**en hirtten  
verkúnt mit lützel milch gesogt klain gespiset Beschnitten<sup>225</sup> Von den drin  
kúngen angebettet in **E**gipten geflohen **D**ie ab gött nider gevellet wider komen.  
müd worden von swären wegen. **G**etöft worden. gebredigot hast. gezeichnet.  
gevastet. túrst. **H**unger gelitten. **V**ersücht. **G**esund gemachet. **T**otten<sup>226</sup> erkicket  
**R**ichtum versmahet [589] **A**rmüt gesücht. lieb gehapt **D**ine vygent **D**er iuden  
hass **S**cheltwort. flüch. spotten **G**edulteclich gelitten **A**in bilgri gewesen.  
bekort und versücht **V**erlegt getröst und verstaint demüteclich uff ainem esel  
gesessen **D**as Sacrament<sup>227</sup> uff gesetzt **V**erräten von iudas verkouft und  
hingeben den iuden uff den ölberg gegangen **D**en vatter gebetten. blütigen  
schwaiss. von iuda gekússset. gevangen gebunden. uff den hals und baggen  
geschlagen von den iungern un(d) fründen gelassen gesund gemachet das or **I**n  
annas hus geführt **V**erlognet von petro ze rúwen bewegt. **F**ür Cayphas<sup>228</sup> geführt.  
**F**alschlich gezúgt **V**erspuwen **D**ie ogen verbunden. geantwúrt pylato **F**ür  
herodes geführt in wyssem claid [590] **V**erspottet **A**n die sul gebunden mit

<sup>225</sup> Großgeschriebener Anfangsbuchstabe, aber nicht rubriziert.

<sup>226</sup> Großgeschriebener Anfangsbuchstabe, aber nicht rubriziert.

<sup>227</sup> Großgeschriebener Anfangsbuchstabe, aber nicht rubriziert.

<sup>228</sup> Großgeschriebener Anfangsbuchstabe, aber nicht rubriziert.

gerten und gaislen geschlagen Rot<sup>229</sup> geclaidet. Gekrönt den iuden gezögt verurteilt geclaidt. mit dem alten rock us geführt Das Crütz getragen Willechlich gegangen zü der marter mit mirren getrenckt An das crütz geneglet Gespannen un(d) uff gericht Zwúschen die schächer gehenkt. Für die vygent gebetten din claiden gelosset. gespottet. geschrúwen. Helý Mit essich und gallen getrenckt Din müter dem iunger bevolhen Den iunger der müter Den gaist uff geben Durch die syten gestochen Von dem crütz genomen Begraben Bedeckt mit ainem stain Das grab behüt von diner lieben müter und ander gemainet und geclagt Erstanden ze mitter nacht Die helle zer[591]brochen Die gevangen gelöst. Den iungern erschinen Die siten gezögt Zü himel gefaren Gesendet den hailigen gaist Mir und allen menschen uff hast geton. Dz himelrich. Ihesus xpūs Ain geborner sun des ewigen vatters Erbarm dich úber mich armen súnderi und bis mir gnädig Also lieber Her(r) durch die selben aller hailigosten dine pine lös mich von den langlegungen aller miner vigent Und erlöse mich von dem gähen tod und von den hellschen pinen und behüte mich vor allem trübsal und lait mich arme súnderi durch das hailig crütz da hin du geführt hast den gemartroten schächer der dich wauren gott veriah und bekan(n)t richsnen von welt ze welt iemer ewenlich

HErre ihú xpē Ich arme súnderi bitt dich das mir die [592] Und alles din liden ze hilff koment und mich beschirment von allen schmerzzen und angsten von aller trübsal und trurikait von allem wainen und ellend und dürchächtung miner vÿgent sichtiger und unsichtiger won ich waiss und wär hoffung han Dz in welhem tag ich der selben diner lidung gedächtnus hab das ich in dem selben von dinen gnaden geschirmet wird und darumb lieber her(r) als ich ain güt vest getruwen han zü der unmässigen diner gütikait So bitt ich dich durch din aller miltigostes liden Das du mich behüttist mit senftmütiger hilff und mit emsiger gütikait der du lebst und richsnest mit got de(m) vatter und dem hailigen gaist Ewenlich<sup>230</sup> Amen

GOtt her(r)e gott uss got liecht [593] uss liecht Als du menschlich geschläch an dem galgen des crützes von gebettes wegen dines vatters gerücht bist erlösen und mich dinen unwirdigen diener mit dinem aigen blüt erlöset hást Also bitt ich dich lieber her(r) flyssechlich das du mir nit tügist widerlegung nach miner súnd gestalt Sunder tü mich behalten nach wissen diner grössen erbarmhertzikait Och du her(r)e mins hails Ich bitt dich bewege mich und bis mir ain túrn der sterki und ain úberwindlicher schilt der gerechtikait für die angesicht des liblichen und gaistlichen vÿendes und beschirm mich unwirdigen

<sup>229</sup> Großgeschriebener Anfangsbuchstabe, aber nicht rubriziert.

<sup>230</sup> Großgeschriebener Anfangsbuchstabe, aber nicht rubriziert.

dinen diener vor aller widerwärtikait libs und sel und vollait mich in das ewig  
leben Amen [594]



[Miniatur: „St. Stephan in Konstanz – Einsegnung der ehingerischen Familiengräber“]

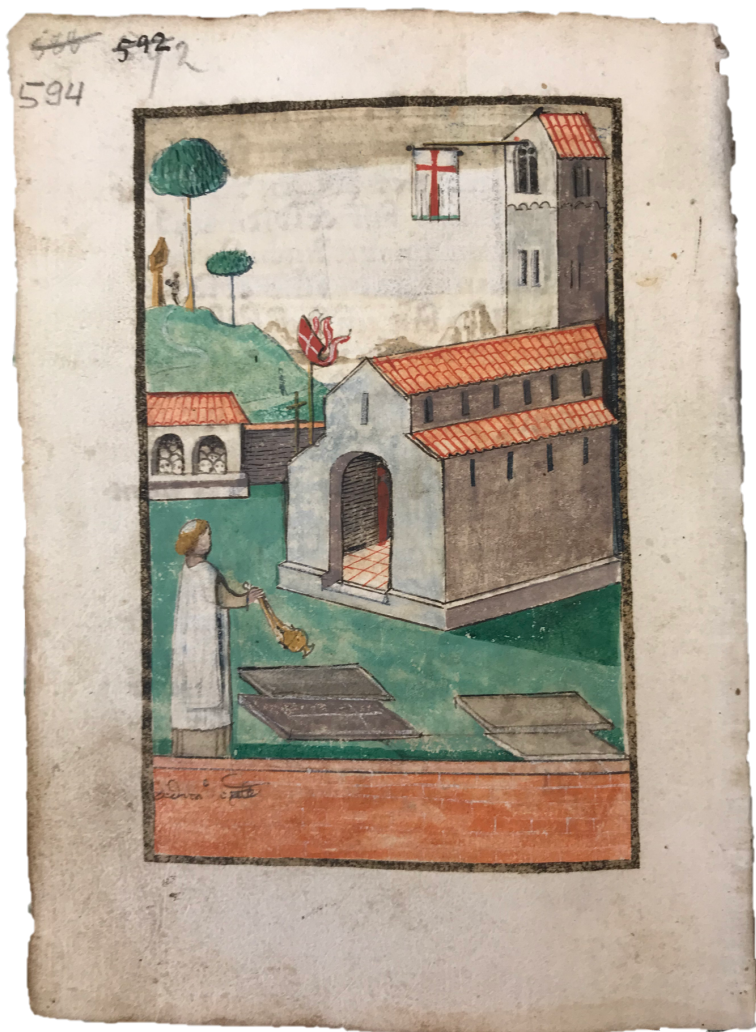



[595] **A**llmächtiger yemer Ewiger<sup>231</sup> gott won du durch das liden und den tod  
dins ain gebornen suns úns glöbigen erbarmhertzlich für sehen hāst mitt  
ablaus und vergebung der sünden und von us gebens wegen sins verdienens  
und des schatzes sins kostbaren blütes die pin die wir schuldig sind darum(b)  
ze liden wider ze legen gnädlich verlihen hast **B**itte(n) wir dich **D**as du úns  
vergebung und diss ablās **D**ie diser hailgen kirchen verlihen sind hie in zit  
tailhaftig machen wellist **A**lso das wir durch vergebung únsrer sünd und pin  
verdienen und tailhaftig werden der eren der himelschen fröden **A**men [596]  
**H**Err ich bitt dich das du mich begüssist und übergüssist mit allen den flüssen  
die von diner hohen gothait ie geflussent **H**er(r) ich bitt dich das du mich  
begüssist und übergüssist mit allen den flüssen die von diner rainen  
minneclichen sel ye geflussent. **H**er(r) ich bitt dich das du mich begüssist und  
über güssist mit allen den flüssen die von diner götlichen menschai ye  
geflussent. **H**err ich bitt dich dz du mich begüssist und über güssist mit allen  
den flüssen so von dinen hailigen wunden und von dinem rosenvarwen blüt ye  
geflussent. **H**er(r) ich bitt dich das du mich begüssist und übergüssist mitt allen  
den flüssen **S**o von diner hohen götlichen min(n) und von den wercken diner  
grund[597]losen erbārdm ye geflussent un(d) von allem dem güt das din zarte  
liebe müter und all hailgen ye gewürcktent  
**H**Err min ihú xpē **I**ch arme sūnderin naig mich für din erbarmhertzigen füß  
und ermanen dich aller der minne wunden die du durch mich und für alle  
sūnder ie empfiengt un(d) alles des minnrichen blütes **D**z du ie vergusst und  
dines bittren kostbaren todes und aller diner hailgen und volkomner werke die  
gelait sind in den hord der hailgen **C**ristenhait von dem alle sūnder empfāhent  
ablās aller ir sūnde  
**S**üsser her(r) nun bitt ich dich das du mir von dem horde diner vollkommen  
werck und dines bittren lidens und dines hailgen todes hūtt gerüchest ze  
gebe(n) [598] ablās aller miner sūnde **U**nd ersetz mich mit diner volkomenhait  
durch din miltikait alle die minn und den dienst und die danckberkait und das  
versumt zit das ich dir schuldig wār gewesen und alles das güt dz du mir ie  
getāt **U**nd bitt dich dūrch din grundlosen erbarmhertzikait das du mir abnemist  
alle die pin die ich liden solt umb all min sünd im fegfür  
**H**Err min ihú xpē **I**ch ermanen dich aller der gnadrichen vollkommen werche  
diner userwelten müter und des unmessigen lidens **D**as ir müterlich hertz von  
diner marter und von dinem bittren tod und von aller diner lidung ie empfiengt  
**U**nd ermanen dich aller der hailigen werch die all din hailgen ie gewürcktent  
und aller der lidung [599] so in dinem nam(m)en un(d) durch din götlich minne  
ie gelittent **D**ie gelait sind zū dem hord diner minneclichen wercke **U**n(d) bitt

---

<sup>231</sup> Großgeschriebener Anfangsbuchstabe, aber nicht rubriziert.

dich das du mir gebist von der überflüssigen gnad diner zartten müter und von den werchen diner ußerwelten hailgen **U**nd sunderlich der aubent oder der tag hütt ist ablas aller miner sünden und verlih mir das ich tailhaftig werd alles des güttes das hie in diser kirchen und in allen gotzhúser und an allen gewichten stetten hütt gegenwirtig ist **A**ch min erbarmhertziger herr ihú xpē in disem grundlosen. gott beker hütt all sündler und bestät din userwelten in allem gütten und lós alle glöbigen selen von allem fegfür **M**in erbarmhertziger gott **U**n(d) min getrúwer erlöser und be[600]halter min her(re) ihú xpē **I**ch rüff zü dir verlih mir hütt und alle(m) minem leben **D**as ich min und allen menschen gebresten an seh in ainem sölichen erkennen in dem ich dich in dem aller nächsten vinde von dem güt das mir und allen menschen von dinem götlichen hertzen geben ist also dankbar sy in rechter demütikait **D**as mir und allen menschen din gnäd da von alle zit gemeret werde **A**men

**W**Enn du kirchwihi holest und in die kirchen kumest **S**o bett fünff **P**ater noster und fünff **A**ve maria **A**ins der hailgen drivalentikait. **D**as ander. **D**em hailgen leben. ler. und sterben únsers lieben herren ihú xpī dannen der ablás flúset. **D**as [601] dritt únser lieben frowen und allen hailgen und besunder denen in der e(e)r das gotzhus gewicht ist **D**as vierd allen den selen der lichnam rüwent in der selben kirchen **D**as fünfft für all sündler und sündlerin und für alle die die dem selben gotzhus ie güts geton haind Sy<sup>232</sup> syent lebent oder töd **A**men

[Federzeichnung: ‚Allianzwappen Ehinger-Neithart‘]

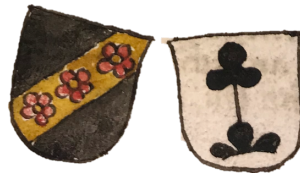

<sup>232</sup> Großgeschriebener Anfangsbuchstabe, aber nicht rubriziert.

[602] **D**iss büch ist vollendet uff **S**annt **I**ohanns tag des töffers als man zalt von der gepürt xpī únsers lieben herren **T**husent vierhundert und im zway und achtzigosten iår **U**nd hett das gemachet und lassen machen **M**argaretha von kappel hainrich **E**hingers sálgen **E**liche wittwe. mit grössem fliß und arbeit zú samem gefügt un(d) uss vil bücher lassen ziehen. got zú lob. ir und irer nachkom(m)en zú bessrung und ir und irem gemahel sálgen und allen glöbigen selen zú trost und erlösung **U**nd begeret von allen denen die diss büch in haind. lesent oder bettent das sy gott trulich für sy und ir gemahel sálgen bittint und sy in irem andächtigen gebett lassen bevolhen sin **A**men [603]

[Miniatur: „Allianzwappen Ehinger-von Kappel“,  
mit Banderole und Schriftzug DIN ALLAIN]

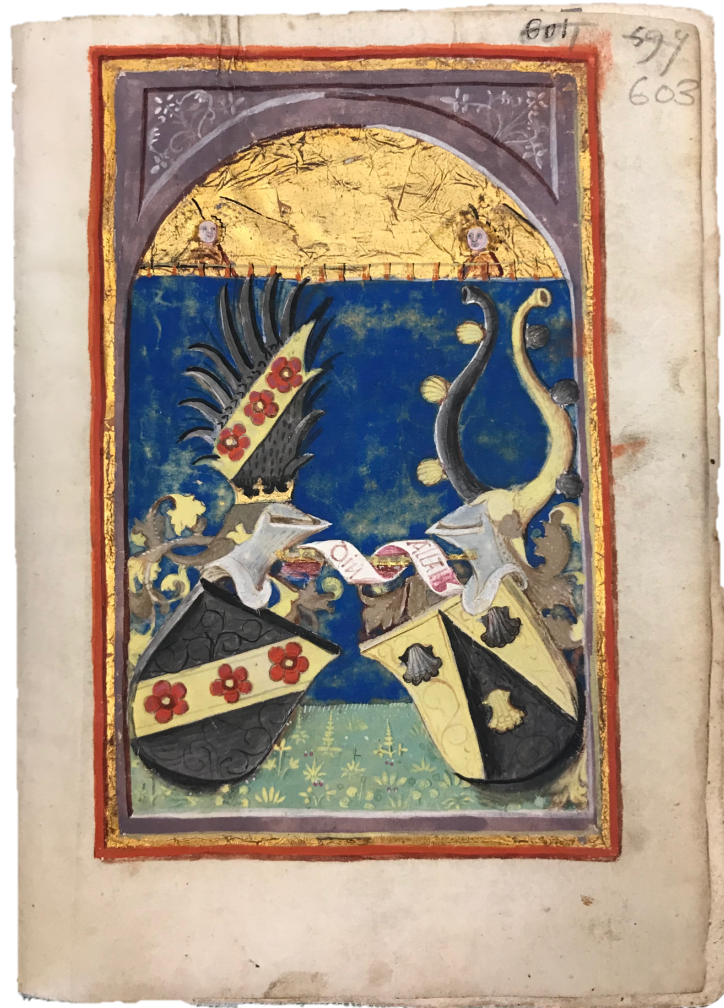

## [Nachträge]

[605] Aine(m) gütten mensche(n) Hát got d(er) her(r) dise iiij zitter geoffenbart an ainem Carfritag Da bi v(er)haisse(n) welch(er) me(n)sch die Er was er jn bitt durch der iiij zitter wille(n) des well er jn erhören un(d) geweren un(d) E er den selbe(n) mensche(n) unerhört welt lon e welt er noch ain Carfrita habe(n) un(d) all sin martter wideru(m) lide(n) Daru(m) sprich dise bett mit fließ P(ro)batu(m) est et cetera

HEr jhú xpē jch ermanen dich des zitters den du entpfiengt. Do du ansächt yn dinem luttren menschlichen gaist Alle die antlit von dene(n) du so unmäßig on alle erbärmd soltest gemartret werden Von der grose(n) not erschrack din zart menschlich hertz das du da von ain sundrige(n) zitter empfiengt Des ermane(n) jch din milte güte un(d) beger dar durch hilff un(d) trost jn mine(n) anlige(n) P<sup>233</sup>(ater) n(oster) et cetera [606]

O Her(r) jhú xpē jch ermane(n) din milt vätterlich hertz Des andren zitters den du geb(e)ndigeter got empfiengt Do du jn dir selbs sächt un(d) erkantost den bittre(n) frost den du woltest lide(n) jn der gaislu(n)g un(d) durch all din liden marter un(d) dot Der so gar unlidig was das dir din hailig blút jn dinen wunde(n) gefror von der angst un(d) not erschrack din milts hertz Das es da von ain grose(n) zitter entpfing Der bis hüt ermanet un(d) kum mir ze hilff jn miner angst un(d) not. P(ater) n(oster) et cetera

O Her(r) jhú xpē jch ermane(n) dich des tritte(n) zitters als du täglich vor dir sächt die von dene(n) du so grimklich an alle erbärmd gemartret soltest werden [607] von den grime(n) juden dine(m) erwelte(n) folck Dem du so vil gütz bewist hattest un(d) täglich tät mit gütter ler wunder un(d) zaiche(n) dz es alles nit halff den das si jn all(er) grimikait jn der nacht un(d) tag mit dir würdint umgon Von der Angst un(d) not erblaichet din göttlich angesicht oft un(d) erschrack din min(n)richs hertz das es da von ain grose(n) zitter enmpfieng Eÿa süß(er) Her(r) durch die not un(d) erzittru(n)g din(er) edle(n) menschait beger jch diner göttliche(n) hilff jn diser not un(d) sach die mir so nach anlit P(ater) n(oster) et cetera

O Edler sun got des himelschen Vatters jch Ermanen dich hüt des fierde(n) zitters den du entpfiengt vo(n) groß(er) scham so dick du gedächtest Das du jn dine(m) liden nackind un(d) bloß soltest [608] ston vor aller menge Un(d) vor di(er) zarte(n) mütter mit dine(m) Hailgen jungfröwkliche(n) lib Der da solt gestalt werde(n) Als ain uß setzig von der not erschrack Din göttlich hertz das es ain sundre(n) zitter da vo(n) entpfiengt Des ermane(n) jch hüt din hochi Maÿestát un(d) bitt Din grundlose erbarmhertzikait Mir well ze hilff kume(n)

---

<sup>233</sup> Der Anfangsbuchstabe ‚P‘ zu *Pater noster* ist hier und im Folgenden verziert.

jn der sach un(d) jn alle(m) mine(m) anlige(n) selich un(d) liplich. P(ater)  
n(oster) et cetera

Hie nâch stond iijj ander zitter die úns(er) her jn siner mart(er) gelitte(n) hát  
fast erhörlich von got jn allen nōtten

O Her(r) jhú xpē jch bitt dich Durch die dōttliche(n) erzittru(n)g diner hailgen  
Menschait Am Olbärg jn dine(m) grose(n) kampf un(d) strit mit ußgiesung des  
blütige(n) schwaiß<sup>234</sup> vo(n) de(m) sich dz ertrich erschutt Das du mich wellist  
erfrōwe(n) un(d) trōste(n) jn all(er) miner not p(ater) n(oster) et cetera

O Starcker got alles gewalts Jch bitt dich durch die dōttlichen erzittrung aller  
diner glid(er) Do du an die Sul würt gebunde(n) Un(d) mit scharp[609]fen  
gaißle(n) un(d) rütten Durchschlagen Das<sup>235</sup> du dins selbs göttlich angesicht  
und(er) der sul jn de(m) bach dins blüts ersächt mit durch littnem uff  
opffrendem hertzen<sup>236</sup> du mir ze hilff un(d) trost kumist jn der sach p(ater)  
n(oster) et cetera

O Du edler sun gotz jch bitt un(d) ermane(n) hüt din milt vätterlich hertz Der  
grose(n) schmerzcklichen erzittru(n)g all(er) diner glid(er) un(d) aüdre(n) Do  
du so unerbarmhertzicklich uff dz ruchi<sup>237</sup> hert crütz geneglet Würd das vo(n)  
jettliche(m) ham(er) schlag din gantz(er) lib erzittret Un(d) sich erschutt Un(d)  
beger durch die sterbende(n) dots not un(d) zittru(n)g Du mich erfrōwist jn der  
sach p(ater) n(oster) et cetera

O Milt(er) gütig(er) Her(r) jhú xpē jch rüff hüt an din lesti dots not am crütz  
un(d) bitt din göttliche Almächtikait Durch die erschrocke(n)liche(n)  
erzittru(n)g jn der himel un(d) erd bewegt ward Do der grim bitter dot an din  
vätt(er)lich hertz stieß am hailge(n) fron crütz Das sich din edl(er) lib erschutt  
un(d) erzittret mit de(m) crütz<sup>238</sup> Un(d) dots not un(d) we durch gieng all din  
natur bis zū ußgang dins edle(n) gaist Das du min arms gebett erhörst mir ze  
hilff un(d) trost kumist jn d(er) sach nâch dine(m) lob un(d) min(er) sel hail  
Amen p(ater) n(oster) et cetera [610]

Item man findt geschriben Do der Her(r) jhs an dem hailgen fron Crütz<sup>239</sup>  
gesproche(n) hát Das vj wort Consumatu(m) est Das er drig groß jnwendig  
frōden hát jn sine(n) obren creffte(n) un(d) jn siner gottriche(n) Sel Die erst  
Frōd Das er den wille(n) got sins himelsche(n) vatters jn der höchste(n)  
folkome(n)hait volbrächt Die ander Frōd das als menschlich geschlächht durch  
sin bitter Lide(n) un(d) sterben erlöst un(d) wid(er) kofft wz Die iij frōd das

<sup>234</sup> mit ußgiesung des blütige(n) schwaiß ist am linken Seitenrand ergänzt.

<sup>235</sup> Großgeschriebener Anfangsbuchstabe, aber nicht rubriziert.

<sup>236</sup> uff opffrendem hertzen ist am linken Seitenrand ergänzt.

<sup>237</sup> Auf dem i fehlt der i-Punkt.

<sup>238</sup> mit de(m) crütz ist am linken Seitenrand ergänzt.

<sup>239</sup> Großgeschriebener Anfangsbuchstabe, aber nicht rubriziert.

als sin ellend un(d) lide(n) jetz ain end hatt un(d) er wid(er)u(m) solt gon zum Vatter jm bringe(n) den schatz sins hohen verdienens Welch(er) mensch jnn derer iij fröd mit andächt ermanet<sup>240</sup> un(d) dise nachfolgende(n) Gebett un(d) p(ater) n(oster) spricht<sup>241</sup> den wil er och erfröwe(n) und tröste(n) jn alle(n) sine(n) Anlige(n) selich und liplich was er vo(n) jm bitt un(d) begert un(d) hát d(er) selb mensch vo(n) Bapst Cleme(n)s xviiijm jar applas täglich(er) sünd un(d) xviiij jar döttlich(er) sünd Als dick er dis bettet un(d) würt sich(er)lich gewert un(d) erfröwt. [611]

O Her(r) jhú xpē Du verclärter edler Sun gotz jch Ermane(n) din milt vätterlich hertz Der unusprechenlichen Fröd diner obren crefft Un(d) dins gotrichen Gaists Do du hangotest An dem Hailge(n) Fron Crütz jn sterbender hinziehend(er) not un(d) da erkantost Das du den wille(n) und befelch Got dins Himelschen Vatters jn d(er) höchsten folkomenhait hattest volbracht Von dem ußgang diner Göttlichen Maÿestát jn das tieff ellend únßer menschaiť Die xxxiiij jar durch all din durchlitte(n) Lebe(n) Bis zů uff opffru(n)g dins edlen Gaists am stamen des hailge(n) Fron crütz Und Beger durch die göttliche(n) fröd vo(n) der milten Aúder diner güti Du mich wellist erfröwe(n) un(d) trösten jn der sach N<sup>242</sup> un(d) jn alle(n) minen Angste(n) un(d) nötte(n) selich un(d) liplich P(ater) n(oster) Ave maria. et cetera

O Du geb(e)ndÿeter Sun got des himelsche(n) Vatters jch Ermane(n) Din min(n)blügend Hertz Der andre(n) Ungemessnen fröd diner gottri[612]chen Sel Am hohen Ast des Fron crütz Do du ansächt jn süßer Min Das alles menschlich geschlächť durch din Hochwürdigis verdiene(n) Durch din schmerzcklich bitter liden un(d) sterben Erlöst un(d) wideru(m) koffť was jn dz Ewig Rich din(er) göttliche(n) anscháwu(n)g Da von din gaist wid(er)blick un(d) jubilirt<sup>243</sup> uff jn das vätterlich Hertz Und beger dar durch hilff Un(d) trost vo(n) diner güti jn dißer sach die mir so nách an lit P(ater) n(oster) Ave ma(ria). die iij

O Du sterbender Her(r) jhú xpē erzittret un(d) erblaichet vo(n) gegenwürtiger dots angstbarkait am hailgen fron Crütz jch Ermanen hüt din Süß vätterlich(s) hertz Der tritt(e)n ungeschätzte(n) Fröd dins gaits jn d(er) jüngste(n) dots not. Do din ansächt Das jetz all din ellend pin un(d) martter jnwendig und ußwendig Ain end hatt Un(d) wideru(m) soltest gon zů got dine(m) himelsche(n) Vatter jm bringe(n) Den hochgültige(n) schatz dins [613] Costparen lidens un(d)

<sup>240</sup> *ermanet* ist am linken Seitenrand ergänzt.

<sup>241</sup> Korrektur auf einem ausradierten Wort (evt. *ermanet*).

<sup>242</sup> Großbuchstabe, aber nicht rubriziert.

<sup>243</sup> *un(d) jubilirt* ist zeilenübergreifend am rechten (*und*) sowie linken Seitenrand (*jubilirt*) ergänzt.



blütvergießens für all únsér súnd un(d) schuld Und nu(n) mit jm Regierend himel un(d) erd jn Ewiger gewaltsamkait Und beger von diner göttliche(n) Almächtikait Du mich durch dise drig dine göttliche(n) Fröde(n) erfröwist un(d) tröstist jn der gegenwürtige(n) sach Un(d) jn alle(n) mine(n) nötte(n) jetz un(d) an minem leste(n) end Amen P(ater) n(oster) Ave ma(ria). et cetera Ite(m) welcher mensch únßern herre(n) diser vij nachfolgende(n) große(n) pin rōb<sup>244</sup> un(d) schmachait ermanet die er durch únsret wille(n) gelitten mit rechter begierd un(d) andácht Der selb mensch jst sicher un(d) gewisß dz jnn got och Erfröwe(n) un(d) tröste(n) wil jn alle(n) sine(n) nötte(n) selich un(d) liblich un(d) jst unmöglich er vo(n) got geláße(n) werde(n) jn sinem Anligen jst bewárt worden et cetera

O Her(r) jhú xpē Du Schin und glantz vätterlicher Er un(d) gl(or)i jch Ermanen din hochi Maýestát un(d) Sünliche Adelkait Der grosen schmach lestru(n)g und schantlichen berobu(n)g Dins göttliche(n) name(n)s jn dine(m) bittre(n) liden Vo(n) den grime(n) juden [614] Die dich namptend ain Toren ain bößwicht un(d) verkerer des folck Da von din göttliche Almächtikait vertruckt Das Ewig vätterlich hertz größklich enderet ward Des bis hüt ermanet Und kum mir ze hilff Und trost Jn alle(n) mine(n) angste(n) un(d) nötten sunder jn diser gegenwürtige(n) sach N<sup>245</sup> P(ater) n(oster) Ave ma(ria).

O Du Vätterlichs wort Du Sun d(er) Ewige(n) gepurt jch Ermanen din süs milt güttig hertz Der andre(n) grose(n) schmach Un(d) berobu(n)g Jn der du richmächtiger Her(r) himelrichs un(d) ertrichs welch(er) Beklaidt tier Und(d) mensche(n) Aller diner claiden schantlich berobet würdt Vor dem Crütz Un(d) an dem Crütz Das all din Lib erzittret vo(n) dots frost Un(d) ellend(er) Anblick nie gesechen ward Uff erd Den von dir dem Hoche(n) edle(n) Sun gotz Des bis hüt ermanet Un(d) erhör mich arme(n) sünderin Jn mine(m) anligen. P(ater) n(oster) Ave ma(ria). et cetera iij

O Du Fröd der Engel un(d) spiegel All(er) clarhait Her(r) jhú xpē du wolgestalt(er) Under den sünen der mensche(n) Jch bitt und Ermane(n) hüt das tieff Abgründ din(er) vätt(er)[615]liche(n) Barmhertzikait Der grosen schand Un(d) schmach so diner göttliche(n) Adelkait erbottle(n) ward Jn der Anspigu(n)g Verspottu(n)g Und verbindu(n)g diner göttliche(n) Ogen Da von All din Nattur erzittret Mit uff opffrende(n) träche(n) zû got Dine(m) himelsche(n) Vatter des bis hüt von mir arme(n) gelopt Un(d) geeret für alli mensche(n) Und kum mir ze hilff jn mine(n) nötten –P(ater) n(oster) Ave ma(ria). et cetera iiij

<sup>244</sup> rōb ist oberhalb von pin ergänzt.

<sup>245</sup> Großbuchstabe, aber nicht rubriziert.

O Starcker got alles gewalts des wýßhait raiget Von end bis zû end Jch Ermanen din minwallend sûs gütig Hertz Der aller tieffosten Demütikait Jn der du dich Edler sun gotz naigtost Under de(n) Gewalt all(er) diner figind Die dich Am hoche(n) Carfritag berobetend Aller diner me(n)schlichen crafft Un(d) macht durch die erschrockenliche(n) Pin un(d) martter Mit der sý dich jn sel un(d) lib durchschnittent Also dz crafftloßer zittrend(er) hertz Un(d) glid(er) uff all(er) erd nie geseche(n) ward Des bis hût ermanet Und tröst Un(d) erfröw mich jn d(er) sach P(ater) n(oster) et cetera v

O Du küng der gl(or)i Un(d) Richer Her(r) alles weßen sitzend ob Cherubin Un(d) Seraphin jn gewaltiger Regieru(n)g Jch er[616]manen die Rich wallende(n) Auder diner güti Der fünften schmach un(d) armüt din(er) hailgen menschait jn dem Das du des gantze(n) ertrichs berobet wûrd dir nit so vil Statt geben ward Du dine füß möchtist setze(n) Un(d) din geb(e)ndýet hopt naigen Vo(n) alle(n) dem das du geschaffen hást Da vo(n) din hertz un(d) all din natur erstarb Jn tieffe(n) ellend un(d) geláßenhait Des bis hût Ermanet Un(d) erhör mich arme(n) me(n)sche(n) jn der sach N nách dinem lob Un(d) miner sel hail P(ater) n(oster) Ave ma(ria). et cetera vj

O Her(r) jhú xpē du Kron un(d) lon all(er) hailgen Jch rüff hût an dz jn(n)igost Marg diner Vätterlichen Min un(d) liebi Die dich Hochen got hát geton mensch werden Und Ermanen din sterbend dot zittrend hertz Jn lidens bitterkait Das du alles dins Rosenvarben blûts jn milter ußgießung berobet bist jn welcher pin Un(d) martter die grime(n) juden sùchtend din Edel blügend Leben Des bis hût ermanet Un(d) von mir arme(n) sùnderin gelopt Un(d) geeret Un(d) erfröw un(d) tröst mich jn der sach P(ater) n(oster) Ave ma(ria). et cetera [617]

O Her(r) jhú xpē wárer got Und mensch Rich jn all Her(r) des lebens jch Bitt un(d) ermane(n) hût din Hoche(n) göttliche mage(n) Crafft der vij schmach un(d) all(er) gröste(n) schand jn d(er) du Edler Jsac wûrd geopffret<sup>246</sup> un(d)<sup>247</sup> gehenckt An des hailig Fron Crütz Un(d) da durch die unme(n)schliche(n) pin Un(d) martter berobet<sup>248</sup> Dins edle(n) Lebens Vo(n) dem grime(n) dot angestosse(n) Eýa<sup>249</sup> got himelscher Vatter Jch rüff jn den schrin diner Vätterliche(n) barmhertzikait Sich an dz dot blaich Antlit dins gekrismete(n) Sun am hailge(n) fron Crütz hangend jn hinziehender sterbend(er) not Un(d) erfröw un(d) tröst mich Durch sin lesten ruck Un(d) grimen hertzen bruch Jn disen sachen N un(d) jn allen mine(n) nôtte(n) selich un(d) liplich Nach dinem

<sup>246</sup> *geopffret* ist am rechten Seitenrand ergänzt.

<sup>247</sup> *un(d)* ist oberhalb von *wûrd* ergänzt.

<sup>248</sup> Vor *berobet* steht durchgestrichen *wûrd*.

<sup>249</sup> Großgeschriebener Anfangsbuchstabe, aber nicht rubriziert.

göttliche(n) wolgefalle(n) un(d) minem hail un(d) noturfft **Amen** **P(ater)**  
**n(oster)** **Ave ma(ria)** et cetera

Item wär diße nachgeschribne(n) iij p(ater) n(oster) Mit fliß un(d) andächt  
spricht **Der** entpfächet da von grose gnad frucht nutz un(d)  
überschwenglichen **Applás** von vil bápsten **Und** sond geordnet werde(n) in  
die iij gröste(n) werch der liebi so der hoch got durch únß geton un(d) gewürckt  
hát **Der** me(n)sch würt vo(n) got in kaine(n) nötte(n) nüm(er) v(er)lon. et  
cetera [618]

**O** Hoch geb(e)n(e)dicte drývaltiakit **Du** urspru(n)g **Anfang** end und zil alles  
weßens **Regierend** **Und** guberniere(n)d **Alli** geschaffenhait in himel und erd  
mit **Ewiger** gewaltsamkait jch **Ermanen** hüt din göttliche **Maýestát** der drige(n)  
grösten werch so du hoher got hást gewürckt **In** himel und erd um(b) erlösung  
menschlicher natur **Und** büt hüt uff **O** got himelscher vatter für die ogen diner  
vätterlichen gl(or)i **Das** erst aller gröst werch **Der** mensch werdu(n)g dins **Suns**  
**Den** glantz und schin diner **Maýestát** ligend jm **Crúpplin** in clainer stinnender  
menschait **Siech** an den tieffen **Undergang** siner **Sünlichen** **Adelkait** vom  
höchsten thron [619] in das nidrest únsrer natur **Von** aller **Er** un(d) gl(or)i in  
als liden elle(n)d und verschmácht bý únß wonend xxxiiij jar warer got un(d)  
me(n)sch<sup>250</sup> **Der** **Sun** der **Ewigen** gepurt der wolgestalttest under den kinder der  
mensch(e)n **In** welchem din vätterlich **Hertz** ain süßes wolgefalle(n) hát erzögt  
mit den wortte(n) **Hic** est fil(us) me(us) dilect(us) et (cetera) **Und** beger durch  
die hohen liebi in der du inn únß gesent **Un(d)** geben hát zú erlösung  
verzichtung **Aller** miner sünd und schuld **Die** jch je begangen hon von minen  
kintlichen tage(n) bis **Uff** die stund in diner göttlichen botten und rätten **In**  
versumlichait gütter wort **Und** werch och aller cristenlichen ordnu(n)g und  
satzung **Und** büt dir hüt mit **Maria** der **Ewige(n)** **Magt** din jungen  
núwgeborne(n) und on end ewig geborne(n) **Sun** um(b) gnad hilff **Un(d)**  
barmhertzikait mir und **Allen** menschen in all únßre(n) angste(n) un(d) nötte(n)  
selich un(d) liplich **N. p(ater) n(oster)** et cetera [620]

**Eýa** got **Himelscher** vatt(er) du spiegel aller clárhait **Du** süße wun **Und** fröd  
aller himelschlichen und **Engelschlichen** gaisten **Ich** büt hüt uff dem glantz  
diner gl(or)i das ander hoch werch diner verborgne(n) haimlichait **Din**  
blútschwitzenden **Sun** am **Ölbárg** sin erbidmete(n) lib **Sin** dotfechtend hertz  
**Sine** haíß wallenden tráchen und cláglich rúffen in sterbend(er) not **Siech** an  
**Din** kind **Din** gl(or)i **Din** ußblügendes wort ligend **Ußgespant** uff dem ertrich  
trurig **Und** durchlitten bis in dot übergossen **Mit** blüttige(m) schwaíß **In**  
getuncket in das tieff me aller bitterkait **Gantz** geláße(n) **Un(d)** ergebe(n) in alli  
pin **Un(d)** martter für mich verlores scháfflin **Min** schwäre schuld **Un(d)** sünd

---

<sup>250</sup> *un(d) me(n)sch* ist am rechten Seitenrand ergänzt.

mit sine(m) großen kampff **U**nd strit ze bützen **D**es bis hüt ermanet **U**nd erbarm dich über mich **U**nd alli arme ver[621]kerti sündige menschen die dir **U**m(b) **D**ine gáben und gnade(n) **O**ch um(b) das liden dins kinds nie gedancket hond **U**nd kum únß ze hilff **U**nd trost **J**n aller angst **U**nd not jn der wir diner hilff **U**nd gnad notturfftig sind N<sup>251</sup> **D**urch **J**hm xpm dinen gehrosame(n) sun **p**(ater) **n**(oster) **ave ma(ria)** et cetera

**O** Vatter der liechter **U**nd künfftigen gütter **J**ch ermanen hüt din hochi<sup>252</sup> **M**aýestát **D**es tritten aller groste(n) werch so du hást gewürckt **J**n dem schloß únßer erlösung **J**n dem grimen bittren unschuldigen dot **D**ins geláßnen **S**uns am stame(n) des hailgen **F**ron crütz **E**ya got himelscher vatter **N**un siech an die **K**ron dins kayßerthúms **D**as zeptor diner gl(or)i **D**en glantz **U**nd schin din(er) **E**wigen maýestát **H**angend am **H**ochen ast des fron **C**rütz jn sterbender not **J**n der aller gröste(n) bitterkait [622] pin **U**nd martter die kain geschaffne creatur nie gesechen noch gelitten hát **M**it zerspannen **A**rmen foll starcker min jn dots fechtender not **F**oll wunden un(d) gar mit blüt berunen **U**nd jm hárgang der nünde(n) stund **A**ngestoßen mit dem leste(n) grimend dots we **D**urch gend all sine glider bain marg **U**nd geäder bis zú dem grimen bruch sins süs vergötteten hertzen **J**n uffgebunf un(d) ußláßung sins **E**dlen gaists **V**om welchem dot himel und erd erbidmet **S**un un(d) mon vertuncklet **J**n blüt kert **A**ll lebendig creature(n) jn forcht erzittru(n)g **U**n(d) schrecken gesetzt sind **D**es bis hüt starcklich ermanet **U**nd erbarm dich über din arme cristenhait **U**m(b) geben mit aller angst und not **N**im hin von únß die gaißel dins zorns **D**en grose(n) unfrid **U**nd unainikait **J**n gaischliche(n) und lipliche(n) **J**n misshállu(n)g **D**es globe(n) **O**ch die erschrockenlichen pestilentz [623] und hungers not **D**urch **j**hm xpm dinen blütnassen sun **D**urch all sin hochwürdigis verdienen schmerzcklich liden **U**nd sterben **M**it welche(m) er all únßer sünd **U**nd schuld hát gebützt **K**um únß ze hilff **J**n alle(m) kumer **U**n(d) liden selich **U**n(d) liplich jetz **N** und an únßerm lesten end **A**men **p**(ater) **n**(oster) et cetera

[624–627: leer]

[628] dis bú ist margrethen ehingerjn am mergstatt

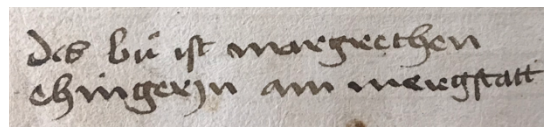

<sup>251</sup> Am Seitenrand ergänzt, Großbuchstabe, aber nicht rubriziert.

<sup>252</sup> *hochi* ist oberhalb von *din* ergänzt.
